# Supplementary material for: The Evolution of an Invasive Plant, Sorghum halepense L. (‘Johnsongrass’)
Source: PubMed Central journal article supplement (PMC7240026; doi:10.3389/fgene.2020.00317), 2020-05-14
Supplement: Presentation_1.pdf [file Presentation_1.pdf]

## *Supplementary Material*

Supplementary Table 1: Coding DNA sequence polymorphism patterns among *Sorghum halepense*, its progenitors *S. propinquum* and wild *S. bicolor*, an elite domesticated *S. bicolor*, and the outgroup *S. timorense*. x indicates sequence divergence, o indicates correspondence (data summarized in Table 1).

*Table is 196,872 lines long, needs to be uploaded separately.*

Supplementary Table 2: Coding DNA sequence polymorphisms with high inferred 'functional impact score' ( $S_i$ ) suggest important consequences for protein function in 5957 *Sh* genes.

*Table comprises 3 sheets, that are up to 5982 lines long, need to be uploaded separately.*

Supplementary Table 3:

Function enrichment test of genes containing potential deleterious SNVs that are unique to *S. halepense* ( $P < 0.05$ ).

|                        | Cellular component                                                                               | Molecular function                                                                                                | Biological process                                                                                                       |
|------------------------|--------------------------------------------------------------------------------------------------|-------------------------------------------------------------------------------------------------------------------|--------------------------------------------------------------------------------------------------------------------------|
| Premature              | Golgi apparatus 163<br>Nucleus 1091<br>Cell wall 112<br>Extracellular 333<br>Plasma membrane 545 | Hydrolase activity 448<br>Kinase activity 248<br>Transferase 475<br>Receptor binding 32<br>Nucleotide binding 620 | Protein metabolism 679<br>Response to stress 674<br>Response to abiotic or biotic stimulus 633<br>DNA/RNA metabolism 156 |
| Loss of stop codon     | Plasma membrane 320                                                                              | Kinase activity 146<br>Receptor binding 21<br>Nucleotide binding 372                                              | Protein metabolism 387<br>DNA/RNA metabolism 99                                                                          |
| Translation initiation | Plasma membrane 33                                                                               | NA                                                                                                                | NA                                                                                                                       |
| Total                  | Extracellular 461<br>Plasma membrane 781                                                         | Hydrolase activity 645<br>Kinase activity 347<br>Transferase 669<br>Receptor binding 48<br>Nucleotide binding 873 | Protein metabolism 967<br>Developmental process 830<br>DNA/RNA metabolism 231                                            |



Supplementary Table 4: Gene expression in *S. halepense* rhizome buds and rhizome-derived shoot buds, and associated statistics, also including *S. bicolor* or *S. propinquum*-associated SNPs.

*Table is 99,501 rows, needs to be uploaded separately.*

Supplementary Table 5: GO analysis of functions enriched in genes differentially expressed in rhizome buds or shoot buds.

| GeneList                 | Fishers_p<br>Val | bonferroni | benjamin<br>i | fdr      | efold | Type     | Term       | Definition                                        |
|--------------------------|------------------|------------|---------------|----------|-------|----------|------------|---------------------------------------------------|
| DEG                      | 0.000918         | 0.186379   | 0.186379      | 0.000918 | 68.10 | PFA<br>M | PF00956    | Nucleosome assembly protein (NAP)                 |
| Rhizome_ON_shoot_OFF     | 0.000019         | 0.003992   | 0.003992      | 0.000019 | 1.97  | GO       | GO:0005524 | ATP binding                                       |
| Rhizome_ON_shoot_OFF     | 0.000238         | 0.049485   | 0.016495      | 0.000240 | 7.71  | GO       | GO:0007018 | microtubule-based movement                        |
| Rhizome_ON_shoot_OFF     | 0.000238         | 0.049485   | 0.012371      | 0.000241 | 7.71  | GO       | GO:0003777 | microtubule motor activity                        |
| RhizomeON_shoot_OFF      | 0.000238         | 0.049485   | 0.009897      | 0.000243 | 7.71  | GO       | GO:0005871 | kinesin complex                                   |
| Rhizome_ON_shoot_OFF     | 0.000065         | 0.008987   | 0.004493      | 0.000066 | 24.70 | KEG<br>G | K10406     | KIFC2_3; kinesin family member C2/C3              |
| Rhizome_ON_shoot_OFF     | 0.000445         | 0.185842   | 0.030974      | 0.000450 | 6.85  | PFA<br>M | PF00225    | Kinesin motor domain                              |
| Rhizome_ON_shoot_OFF     | 0.000920         | 0.384645   | 0.054949      | 0.000934 | 10.96 | PFA<br>M | PF07717    | Oligonucleotide/oligosaccharide-binding (OB)-fold |
| Rhizome_ON_shoot_OFF     | 0.000920         | 0.384645   | 0.048081      | 0.000936 | 10.96 | PFA<br>M | PF04408    | Helicase associated domain (HA2)                  |
| Rhizome_ON_shoot_OFF     | 0.000920         | 0.384645   | 0.042738      | 0.000938 | 10.96 | PFA<br>M | PF13646    | HEAT repeats                                      |
| Shoot_ON_Rhizome_OF<br>F | 0.000469         | 0.031869   | 0.015935      | 0.000476 | 11.79 | GO       | GO:0048544 | recognition of pollen                             |
| Shoot_ON_Rhizome_OF<br>F | 0.000326         | 0.037187   | 0.037187      | 0.000326 | 13.06 | PFA<br>M | PF08276    | PAN-like domain                                   |
| Shoot_ON_Rhizome_OF<br>F | 0.000540         | 0.061514   | 0.020505      | 0.000549 | 11.35 | PFA<br>M | PF00954    | S-locus glycoprotein domain                       |

Supplementary Table 6. Mutations in carotenoid biosynthesis-related genes within QTL likelihood intervals for variation in seed lutein levels.

**Sb01g013520 (chr1: 12577208-12579043)**

**Function annotation:**

NCED3 (NINE-CIS-EPOXYCAROTENOID DIOXYGENASE 3); 9-cis-epoxycarotenoid dioxygenase (20)

<http://sorghum.riken.jp/morokoshi/Data/Sb01g013520.html>

**SNP mutations:**

|              |          |   |   |   |                 |   |     |     |
|--------------|----------|---|---|---|-----------------|---|-----|-----|
| chromosome_1 | 12578413 | - | C | A | Sb01g013520 CDS | 0 | 631 | 631 |
| 211          | E        | * |   |   |                 |   |     |     |
| chromosome_1 | 12578434 | - | C | A | Sb01g013520 CDS | 0 | 610 | 610 |
| 204          | E        | * |   |   |                 |   |     |     |

**QTL interval:**

chr1: 1-15219573 (QTL effect: color, lutein,  $\beta$ -carotene)

**Explanation of gene annotation:**

A key regulated step in abscisic acid (ABA) biosynthesis in plants is catalyzed by 9-*cis* epoxycarotenoid dioxygenase (NCED), which cleaves 9-*cis* xanthophylls to xanthoxin, a precursor of ABA.

**Sb02g026600 (chr2: 61762825-61765740)**

**Function annotation:**

(+)-abscisic acid 8'-hydroxylase/ oxygen binding

<http://sorghum.riken.jp/morokoshi/Data/Sb02g026600.html>

**SNP mutations:**

Sb02g026600 contains several large effect nsSNP and also contains one SNP in intron that is differed between wild SB and domesticated SB.

|              |          |   |   |   |                        |      |
|--------------|----------|---|---|---|------------------------|------|
| chromosome_2 | 61764702 | - | T | G | Sb02g026600 Intron 246 | 1039 |
|              | 1861     | . | . | . |                        |      |

**QTL interval:**

chr2: 61367786-76144244 (QTL effect: lutein,  $\beta$ -carotene, total carotenoids)

**Explanation of gene function (cold tolerance?):**

The plant hormone abscisic acid (ABA) regulates many important physiological and developmental processes in plants as well as adaptive responses to environmental stresses. During seed development and dormancy, ABA content increases as a potential signal to organize expression of many embryo-specific genes. The ABA level is also elevated in response to various environmental stresses such as drought, high salinity, and low temperature conditions. The hydroxylation at the 8'-position of ABA is known as the key step of ABA catabolism, and this reaction is catalyzed by ABA 8'-hydroxylase, a cytochrome P450.

7. Mutations in carotenoid biosynthesis-related genes within QTL likelihood intervals for variation in seed lutein levels.

**Sb01g013520 (chr1: 12577208-12579043)**

**Function annotation:**

NCED3 (NINE-CIS-EPOXYCAROTENOID DIOXYGENASE 3); 9-cis-epoxycarotenoid dioxygenase (20)



<http://sorghum.riken.jp/morokoshi/Data/Sb01g013520.html>

**SNP mutations:**

|              |          |   |   |   |                 |   |     |     |
|--------------|----------|---|---|---|-----------------|---|-----|-----|
| chromosome_1 | 12578413 | - | C | A | Sb01g013520 CDS | 0 | 631 | 631 |
| 211          | E        | * |   |   |                 |   |     |     |
| chromosome_1 | 12578434 | - | C | A | Sb01g013520 CDS | 0 | 610 | 610 |
| 204          | E        | * |   |   |                 |   |     |     |

**QTL interval:**

chr1: 1-15219573 (QTL effect: color, lutein,  $\beta$ -carotene)

**Explanation of gene annotation:**

A key regulated step in abscisic acid (ABA) biosynthesis in plants is catalyzed by *9-cis* epoxy-carotenoid dioxygenase (NCED), which cleaves *9-cis* xanthophylls to xanthoxin, a precursor of ABA.

**Sb02g026600 (chr2: 61762825-61765740)**

**Function annotation:**

(+)-abscisic acid 8'-hydroxylase/ oxygen binding

<http://sorghum.riken.jp/morokoshi/Data/Sb02g026600.html>

**SNP mutations:**

Sb02g026600 contains several large effect nsSNP and also contains one SNP in intron that is differed between wild SB and domesticated SB.

|              |          |   |   |   |                    |     |      |
|--------------|----------|---|---|---|--------------------|-----|------|
| chromosome_2 | 61764702 | - | T | G | Sb02g026600 Intron | 246 | 1039 |
| 1861         | .        | . | . | . | .                  | .   | .    |

**QTL interval:**

chr2: 61367786-76144244 (QTL effect: lutein,  $\beta$ -carotene, total carotenoids)

**Explanation of gene function (cold tolerance?):**

The plant hormone abscisic acid (ABA) regulates many important physiological and developmental processes in plants as well as adaptive responses to environmental stresses. During seed development and dormancy, ABA content increases as a potential signal to organize expression of many embryo-specific genes. The ABA level is also elevated in response to various environmental stresses such as drought, high salinity, and low temperature conditions. The hydroxylation at the 8'-position of ABA is known as the key step of ABA catabolism, and this reaction is catalyzed by ABA 8'-hydroxylase, a cytochrome P450.
