# Supplementary material for: The Evolution of an Invasive Plant, Sorghum halepense L. (‘Johnsongrass’)
Source: Front Genet. 2020 May 14;11:317. doi: 10.3389/fgene.2020.00317 (PMC7240026; doi:10.3389/fgene.2020.00317)
Supplement: Supplementary file 2 [file Table_1.xlsx]

## Sheet: Premature
Chromosome	Position	Strand	Reference allele	Shalepense allele	Gene ID	Codon phase	Position in gene	Position in CDS	Position in protein	Ref. AA	Halepense AA	KOG	PANTHER	PFAM	Locus defline	GO	Ecpathway info.
chromosome_1	390678	+	C	T	Sb01g000490	0	2394	614	205	Q	*	Nuclear transport receptor CRM1/MSN5 (importin beta superfamily)	CHROMOSOME REGION MAINTENANCE PROTEIN	Importin-beta N-terminal domain|Exportin 1-like protein	similar to Putative chromosome region maintenance protein	protein-nucleus import, docking,nucleus,nuclear pore,cytoplasm,protein transporter activity	None
chromosome_1	417612	+	G	A	Sb01g000540	2	89	89	30	W	*	None	None	None	similar to RPT2-like protein	None	None
chromosome_1	552673	+	C	T	Sb01g000605	0	325	325	109	Q	*	None	None	None	Predicted protein	None	None
chromosome_1	664070	+	C	G	Sb01g000693	2	53	53	18	S	*	None	TRANSPOSASE-LIKE PROTEIN	None	similar to Putative pentatricopeptide (PPR) repeat-containing protein	None	None
chromosome_1	704447	-	G	T	Sb01g000705	2	156	156	52	S	*	None	None	None	Predicted protein	None	None
chromosome_1	908906	+	C	A	Sb01g000960	1	1981	1647	549	C	*	None	KELCH-RELATED PROTEINS	None	similar to Putative uncharacterized protein	None	None
chromosome_1	932159	-	G	A	Sb01g001010	0	3358	857	286	R	*	U5 snRNP-specific protein-like factor and related proteins	WD40 REPEAT FAMILY	WD domain, G-beta repeat|WD domain, G-beta repeat|WD domain, G-beta repeat|WD domain, G-beta repeat|WD domain, G-beta repeat	similar to Putative uncharacterized protein OSJNBa0015N08.19	serine-type endopeptidase activity,proteolysis and peptidolysis	None
chromosome_1	943690	-	G	A	Sb01g001030	0	477	477	159	Q	*	None	None	Frigida-like protein	Predicted protein	None	None
chromosome_1	943897	-	G	A	Sb01g001030	0	270	270	90	R	*	None	None	Frigida-like protein	Predicted protein	None	None
chromosome_1	944104	-	G	A	Sb01g001030	0	63	63	21	Q	*	None	None	Frigida-like protein	Predicted protein	None	None
chromosome_1	997907	-	G	A	Sb01g001100	0	1761	408	136	R	*	RNA polymerase II general transcription factor BTF3 and related proteins	TRANSCRIPTION FACTOR BTF3	NAC domain	similar to NAC domain containing protein, expressed	None	None
chromosome_1	1183036	-	G	T	Sb01g001240	1	1677	2886	962	C	*	Uncharacterized membrane protein, predicted efflux pump	MULTIDRUG RESISTANCE PUMP	MatE|MatE	similar to Os03g0571900 protein	multidrug transport,drug transporter activity,antiporter activity,membrane	None
chromosome_1	1283643	-	C	A	Sb01g001380	0	390	390	130	E	*	None	None	None	similar to Putative uncharacterized protein OSJNBb0043P23.6	None	None
chromosome_1	1283745	-	G	A	Sb01g001380	0	288	288	96	R	*	None	None	None	similar to Putative uncharacterized protein OSJNBb0043P23.6	None	None
chromosome_1	1342851	+	C	A	Sb01g001450	1	1004	141	47	Y	*	None	AMP DEPENDENT LIGASE/SYNTHETASE	None	similar to AMP-binding protein, putative, expressed	catalytic activity,metabolism	None
chromosome_1	1379128	-	G	C	Sb01g001510	2	122	122	41	S	*	None	None	None	similar to Putative uncharacterized protein	None	None
chromosome_1	1417352	-	C	A	Sb01g001570	0	2056	2056	686	E	*	None	PENTATRICOPEPTIDE REPEAT-CONTAINING PROTEIN	PPR repeat|PPR repeat|PPR repeat|PPR repeat|PPR repeat|PPR repeat|PPR repeat|PPR repeat	similar to Putative uncharacterized protein	None	None
chromosome_1	1418652	-	A	T	Sb01g001570	1	756	756	252	Y	*	None	PENTATRICOPEPTIDE REPEAT-CONTAINING PROTEIN	PPR repeat|PPR repeat|PPR repeat|PPR repeat|PPR repeat|PPR repeat|PPR repeat|PPR repeat	similar to Putative uncharacterized protein	None	None
chromosome_1	1425558	+	C	T	Sb01g001580	0	5673	501	167	R	*	None	KINETOCHORE PROTEIN NUF2	None	similar to Nuf2 family protein, expressed	None	None
chromosome_1	1428154	-	G	A	Sb01g001585	0	2576	1837	613	R	*	None	PENTATRICOPEPTIDE REPEAT-CONTAINING PROTEIN	PPR repeat|Tetratricopeptide repeat|Tetratricopeptide repeat|Tetratricopeptide repeat|PPR repeat|PPR repeat|PPR repeat|PPR repeat|Tetratricopeptide repeat|PPR repeat|PPR repeat	similar to Putative uncharacterized protein	None	None
chromosome_1	1430463	-	C	T	Sb01g001585	1	267	267	89	W	*	None	PENTATRICOPEPTIDE REPEAT-CONTAINING PROTEIN	PPR repeat|Tetratricopeptide repeat|Tetratricopeptide repeat|Tetratricopeptide repeat|PPR repeat|PPR repeat|PPR repeat|PPR repeat|Tetratricopeptide repeat|PPR repeat|PPR repeat	similar to Putative uncharacterized protein	None	None
chromosome_1	1518173	+	A	T	Sb01g001720	0	7049	1292	431	K	*	Diphthamide biosynthesis protein	DIPTHERIA TOXIN RESISTANCE PROTEIN-RELATED	Putative diphthamide synthesis protein	similar to Diphthamide biosynthesis protein 2	None	None
chromosome_1	1523680	-	G	A	Sb01g001740	0	1707	455	152	Q	*	None	None	None	similar to Os10g0360900 protein	None	None
chromosome_1	1534257	+	G	T	Sb01g001760	0	912	13	5	G	*	Glycogen synthase kinase-3	CDC2-RELATED KINASE	Protein kinase domain	similar to Putative salt-inducible protein kinase	protein kinase activity,protein serine/threonine kinase activity,protein-tyrosine kinase activity,ATP binding,protein amino acid phosphorylation	Phosphotransferases with an alcohol group as acceptor.;\N;\N;\N;Sphingoglycolipid metabolism;Metabolism of Complex Lipids;METABOLIC,Phosphotransferases with an alcohol group as acceptor.;\N;\N;\N;Benzoate degradation via CoA ligation;Biodegradation of Xenobiotics;METABOLIC,Phosphotransferases with an alcohol group as acceptor.;\N;\N;\N;Starch and sucrose metabolism;Metabolism of Complex Carbohydr…
chromosome_1	1630791	-	G	A	Sb01g001896	0	643	643	215	Q	*	Prenylated rab acceptor 1	PRENYLATED RAB ACCEPTOR 1-RELATED	PRA1 family protein	similar to Prenylated Rab acceptor protein 1	None	None
chromosome_1	1663048	+	G	T	Sb01g001910	0	4815	1510	504	G	*	None	None	None	Predicted protein	None	None
chromosome_1	1722617	+	C	T	Sb01g001995	0	968	520	174	Q	*	None	None	None	Predicted protein	None	None
chromosome_1	1821798	-	G	T	Sb01g002160	2	1667	1227	409	S	*	Cytochrome P450 CYP4/CYP19/CYP26 subfamilies	CYTOCHROME P450	Cytochrome P450	similar to Putative uncharacterized protein	monooxygenase activity,electron transport	Acting on paired donors, with incorporation or reduction of;\N;\N;\N;gamma-Hexachlorocyclohexane degradation;Biodegradation of Xenobiotics;METABOLIC,Acting on paired donors, with incorporation or reduction of;\N;\N;\N;Ascorbate and aldarate metabolism;Carbohydrate Metabolism;METABOLIC,Acting on paired donors, with incorporation or reduction of;\N;\N;\N;Flavonoids, stilbene and lignin biosynthesis…
chromosome_1	1831882	+	C	T	Sb01g002170	0	2412	687	229	R	*	Actin and related proteins	ACTIN	Actin	similar to Actin-11	motor activity,structural constituent of cytoskeleton,protein binding,actin filament	None
chromosome_1	1885858	-	C	T	Sb01g002260	2	1260	528	176	W	*	None	None	Protein of unknown function (DUF789)	similar to Expressed protein	None	None
chromosome_1	1915552	+	C	T	Sb01g002300	0	1786	568	190	Q	*	None	CGI-141-RELATED/LIPASE CONTAINING PROTEIN	Lipase (class 3)	similar to Lipase family protein, expressed	catalytic activity,triacylglycerol lipase activity,lipid metabolism	None
chromosome_1	1926186	-	G	A	Sb01g002325	0	844	844	282	Q	*	None	REVERSE TRANSCRIPTASES	Reverse transcriptase (RNA-dependent DNA polymerase)	weakly similar to Putative polyprotein	RNA binding,RNA-directed DNA polymerase activity,RNA-dependent DNA replication	None
chromosome_1	1926356	-	A	C	Sb01g002325	2	674	674	225	L	*	None	REVERSE TRANSCRIPTASES	Reverse transcriptase (RNA-dependent DNA polymerase)	weakly similar to Putative polyprotein	RNA binding,RNA-directed DNA polymerase activity,RNA-dependent DNA replication	None
chromosome_1	1981255	-	C	A	Sb01g002430	0	2800	3424	1142	E	*	Calreticulin	CALRETICULIN AND CALNEXIN	Calreticulin family	similar to Putative calreticulin	calcium ion binding	None
chromosome_1	2000896	+	G	T	Sb01g002460	0	2875	1735	579	E	*	None	PENTATRICOPEPTIDE REPEAT-CONTAINING PROTEIN	PPR repeat|PPR repeat|PPR repeat|PPR repeat|PPR repeat|PPR repeat|PPR repeat|Helix-hairpin-helix motif	similar to Pentatricopeptide (PPR) repeat-containing protein-like	DNA binding	None
chromosome_1	2041835	+	G	A	Sb01g002510	2	656	504	168	W	*	Reductases with broad range of substrate specificities	SHORT-CHAIN DEHYDROGENASES/REDUCTASE	short chain dehydrogenase	similar to Os03g0833100 protein	metabolism,oxidoreductase activity	Carbonyl reductase (NADPH).;R-CHOH-R' + NADP(+) = R-CO-R' + NADPH.;\N;\N;Prostaglandin and leukotriene metabolism;Metabolism of Complex Lipids;METABOLIC
chromosome_1	2249264	+	C	T	Sb01g002723	0	224	130	44	Q	*	None	SENTRIN/SUMO-SPECIFIC PROTEASE	Ulp1 protease family, C-terminal catalytic domain	similar to Ulp1 protease family, C-terminal catalytic domain containing protein	proteolysis and peptidolysis,cysteine-type peptidase activity	Cysteine endopeptidases.;\N;\N;\N;\N;\N;\N
chromosome_1	2250845	+	C	T	Sb01g002723	0	1805	1093	365	Q	*	None	SENTRIN/SUMO-SPECIFIC PROTEASE	Ulp1 protease family, C-terminal catalytic domain	similar to Ulp1 protease family, C-terminal catalytic domain containing protein	proteolysis and peptidolysis,cysteine-type peptidase activity	Cysteine endopeptidases.;\N;\N;\N;\N;\N;\N
chromosome_1	2263699	-	G	T	Sb01g002750	1	1884	1145	382	C	*	None	None	Phosphoesterase family	similar to Phosphoesterase family protein, putative, expressed	hydrolase activity, acting on ester bonds	None
chromosome_1	2359005	-	G	A	Sb01g002870	0	396	396	132	R	*	UDP-glucuronosyl and UDP-glucosyl transferase	GLUCOSYL/GLUCURONOSYL TRANSFERASES	UDP-glucoronosyl and UDP-glucosyl transferase	similar to Os03g0824600 protein	metabolism,transferase activity, transferring hexosyl groups	Limonoid glucosyltransferase.;UDP-glucose + limonin = glucosyl-limonin + UDP.;\N;\N;\N;\N;\N
chromosome_1	2461983	-	G	A	Sb01g003040	0	1758	1758	586	R	*	None	None	Protein of unknown function, DUF1544|Protein of unknown function (DUF 659)	similar to HAT family dimerisation domain containing protein, expressed	DNA binding	None
chromosome_1	2463570	-	G	A	Sb01g003040	0	171	171	57	Q	*	None	None	Protein of unknown function, DUF1544|Protein of unknown function (DUF 659)	similar to HAT family dimerisation domain containing protein, expressed	DNA binding	None
chromosome_1	2474926	-	A	C	Sb01g003070	2	1579	491	164	L	*	Armadillo/beta-catenin-like repeat-containing protein	PROTEIN FOLDING REGULATOR	Armadillo/beta-catenin-like repeat|Armadillo/beta-catenin-like repeat|Armadillo/beta-catenin-like repeat	similar to Putative uncharacterized protein	None	None
chromosome_1	2481470	-	C	A	Sb01g003090	0	7356	573	191	G	*	Cell division protein FtsJ	RIBOSOMAL RNA METHYLTRANSFERASE	FtsJ-like methyltransferase	similar to FtsJ-like methyltransferase family protein, putative, expressed	None	Methyltransferases.;\N;\N;\N;Androgen and estrogen metabolism;Lipid Metabolism;METABOLIC,Methyltransferases.;\N;\N;\N;Aminophosphonate metabolism;Metabolism of Other Amino Acids;METABOLIC,Methyltransferases.;\N;\N;\N;Porphyrin and chlorophyll metabolism;Metabolism of Cofactors and Vitamins;METABOLIC,Methyltransferases.;\N;\N;\N;Ubiquinone biosynthesis;Metabolism of Cofactors and Vitamins;METABOLI…
chromosome_1	2490179	+	T	G	Sb01g003100	1	1061	729	243	Y	*	None	NITROGEN METABOLIC REGULATION PROTEIN NMR-RELATED	None	similar to Putative uncharacterized protein OSJNBb0081B07.22	None	None
chromosome_1	2522650	-	G	C	Sb01g003130	2	1969	354	118	S	*	Serine/threonine protein kinase	SERINE-THREONINE PROTEIN KINASE, PLANT-TYPE	Protein kinase domain|Protein tyrosine kinase	similar to Protein kinase APK1B, chloroplast, putative, expressed	protein kinase activity,protein serine/threonine kinase activity,protein-tyrosine kinase activity,ATP binding,protein amino acid phosphorylation	Phosphotransferases with an alcohol group as acceptor.;\N;\N;\N;Sphingoglycolipid metabolism;Metabolism of Complex Lipids;METABOLIC,Phosphotransferases with an alcohol group as acceptor.;\N;\N;\N;Benzoate degradation via CoA ligation;Biodegradation of Xenobiotics;METABOLIC,Phosphotransferases with an alcohol group as acceptor.;\N;\N;\N;Starch and sucrose metabolism;Metabolism of Complex Carbohydr…
chromosome_1	2535146	+	C	A	Sb01g003150	1	1074	1074	358	Y	*	None	PENTATRICOPEPTIDE REPEAT-CONTAINING PROTEIN	PPR repeat|PPR repeat|PPR repeat|PPR repeat	similar to Putative uncharacterized protein	None	None
chromosome_1	2644147	-	G	A	Sb01g003290	0	7971	2852	951	Q	*	NEDD8-activating complex, APP-BP1/UBA5 component	UBIQUITIN-ACTIVATING ENZYME E1	ThiF family	similar to ThiF family protein, expressed	None	None
chromosome_1	2655905	-	G	A	Sb01g003310	0	2457	285	95	R	*	GTP-binding protein SEC4, small G protein superfamily, and related Ras family GTP-binding proteins	RAS-RELATED GTPASE	Ras family|Miro-like protein	similar to Ras-related protein ARA-3	two-component signal transduction system (phosphorelay),DNA binding,GTP binding,regulation of transcription, DNA-dependent,intracellular protein transport,small GTPase mediated signal transduction,protein transport	None
chromosome_1	2779811	+	T	A	Sb01g003435	1	216	216	72	C	*	None	SERINE-THREONINE PROTEIN KINASE, PLANT-TYPE	None	weakly similar to Chromosome chr15 scaffold_40, whole genome shotgun sequence	protein kinase activity,ATP binding,protein amino acid phosphorylation	None
chromosome_1	2814128	-	G	A	Sb01g003480	0	1751	831	277	Q	*	Flavonol reductase/cinnamoyl-CoA reductase	NAD DEPENDENT EPIMERASE/DEHYDRATASE	NAD dependent epimerase/dehydratase family	similar to Putative uncharacterized protein	None	Dihydrokaempferol 4-reductase.;Cis-3,4-leucopelargonidin + NADP(+) = (+)-dihydrokaempferol + NADPH.;\N;\N;Flavonoids, stilbene and lignin biosynthesis;Biosynthesis of Secondary Metabolites;METABOLIC
chromosome_1	2848261	+	C	A	Sb01g003520	1	2858	925	309	C	*	None	None	Arabidopsis proteins of unknown function	similar to Expressed protein	molecular function unknown	None
chromosome_1	2877831	-	G	T	Sb01g003540	1	1050	816	272	Y	*	Amino acid transporters	AMINO ACID TRANSPORTER	Transmembrane amino acid transporter protein	similar to Putative uncharacterized protein	amino acid-polyamine transporter activity,amino acid metabolism,amino acid transport,membrane	None
chromosome_1	2896583	-	G	A	Sb01g003570	0	7493	4803	1601	Q	*	None	None	WH2 motif	weakly similar to SCAR-like protein 1	ATP synthesis coupled proton transport,membrane,proton-transporting two-sector ATPase complex,hydrogen-transporting ATP synthase activity, rotational mechanism,hydrogen-transporting ATPase activity, rotational mechanism	Exo-alpha-sialidase.;Hydrolysis of alpha-(2->3)-, alpha-(2->6)-, alpha-(2->8)-glycosidic linkages of terminal sialic residues in oligosaccharides, glycoproteins, glycolipids, colominic acid and synthetic substrates.;\N;Sialidosis; MIM:256550.;N-Glycan degradation;Metabolism of Complex Carbohydrates;METABOLIC,Exo-alpha-sialidase.;Hydrolysis of alpha-(2->3)-, alpha-(2->6)-, alpha-(2->8)-glycosidic …
chromosome_1	2897546	-	T	A	Sb01g003570	0	6530	3840	1280	K	*	None	None	WH2 motif	weakly similar to SCAR-like protein 1	ATP synthesis coupled proton transport,membrane,proton-transporting two-sector ATPase complex,hydrogen-transporting ATP synthase activity, rotational mechanism,hydrogen-transporting ATPase activity, rotational mechanism	Exo-alpha-sialidase.;Hydrolysis of alpha-(2->3)-, alpha-(2->6)-, alpha-(2->8)-glycosidic linkages of terminal sialic residues in oligosaccharides, glycoproteins, glycolipids, colominic acid and synthetic substrates.;\N;Sialidosis; MIM:256550.;N-Glycan degradation;Metabolism of Complex Carbohydrates;METABOLIC,Exo-alpha-sialidase.;Hydrolysis of alpha-(2->3)-, alpha-(2->6)-, alpha-(2->8)-glycosidic …
chromosome_1	2899602	-	C	A	Sb01g003570	0	4474	1890	630	G	*	None	None	WH2 motif	weakly similar to SCAR-like protein 1	ATP synthesis coupled proton transport,membrane,proton-transporting two-sector ATPase complex,hydrogen-transporting ATP synthase activity, rotational mechanism,hydrogen-transporting ATPase activity, rotational mechanism	Exo-alpha-sialidase.;Hydrolysis of alpha-(2->3)-, alpha-(2->6)-, alpha-(2->8)-glycosidic linkages of terminal sialic residues in oligosaccharides, glycoproteins, glycolipids, colominic acid and synthetic substrates.;\N;Sialidosis; MIM:256550.;N-Glycan degradation;Metabolism of Complex Carbohydrates;METABOLIC,Exo-alpha-sialidase.;Hydrolysis of alpha-(2->3)-, alpha-(2->6)-, alpha-(2->8)-glycosidic …
chromosome_1	2899789	-	A	T	Sb01g003570	1	4287	1703	568	Y	*	None	None	WH2 motif	weakly similar to SCAR-like protein 1	ATP synthesis coupled proton transport,membrane,proton-transporting two-sector ATPase complex,hydrogen-transporting ATP synthase activity, rotational mechanism,hydrogen-transporting ATPase activity, rotational mechanism	Exo-alpha-sialidase.;Hydrolysis of alpha-(2->3)-, alpha-(2->6)-, alpha-(2->8)-glycosidic linkages of terminal sialic residues in oligosaccharides, glycoproteins, glycolipids, colominic acid and synthetic substrates.;\N;Sialidosis; MIM:256550.;N-Glycan degradation;Metabolism of Complex Carbohydrates;METABOLIC,Exo-alpha-sialidase.;Hydrolysis of alpha-(2->3)-, alpha-(2->6)-, alpha-(2->8)-glycosidic …
chromosome_1	2900505	-	C	T	Sb01g003570	2	3571	1119	373	W	*	None	None	WH2 motif	weakly similar to SCAR-like protein 1	ATP synthesis coupled proton transport,membrane,proton-transporting two-sector ATPase complex,hydrogen-transporting ATP synthase activity, rotational mechanism,hydrogen-transporting ATPase activity, rotational mechanism	Exo-alpha-sialidase.;Hydrolysis of alpha-(2->3)-, alpha-(2->6)-, alpha-(2->8)-glycosidic linkages of terminal sialic residues in oligosaccharides, glycoproteins, glycolipids, colominic acid and synthetic substrates.;\N;Sialidosis; MIM:256550.;N-Glycan degradation;Metabolism of Complex Carbohydrates;METABOLIC,Exo-alpha-sialidase.;Hydrolysis of alpha-(2->3)-, alpha-(2->6)-, alpha-(2->8)-glycosidic …
chromosome_1	2952761	+	G	T	Sb01g003660	0	2313	742	248	G	*	Transcription elongation factor TFIIS/Cofactor of enhancer-binding protein Sp1	TRANSCRIPTION ELONGATION FACTOR S-II	Transcription factor S-II (TFIIS), central domain|Transcription factor S-II (TFIIS)	similar to Putative uncharacterized protein	DNA binding,transcription factor activity,nucleus,transcription,RNA elongation,regulation of transcription, DNA-dependent,defense response	None
chromosome_1	2979723	+	G	T	Sb01g003700	0	3929	1258	420	E	*	5,10-methylenetetrahydrofolate reductase	METHYLTETRAHYDROFOLATE:HOMOCYSTEINE METHYLTRANSFERASE RELATED	Methylenetetrahydrofolate reductase	similar to Methylenetetrahydrofolate reductase 1	methylenetetrahydrofolate reductase (NADPH) activity,ATP binding,methionine metabolism,ATP synthesis coupled proton transport,proton-transporting two-sector ATPase complex,hydrogen-transporting ATP synthase activity, rotational mechanism,hydrogen-transporting ATPase activity, rotational mechanism	Methylenetetrahydrofolate reductase (NADPH).;5-methyltetrahydrofolate + NADP(+) = 5,10-methylenetetrahydrofolate + NADPH.;FAD.;Homocystinuria II (MTHFR deficiency); MIM:236250.;\N;\N;\N
chromosome_1	3045285	+	C	A	Sb01g003775	1	1113	1113	371	Y	*	None	None	No apical meristem (NAM) protein	Predicted protein	None	None
chromosome_1	3128384	+	G	T	Sb01g003870	0	733	421	141	E	*	Predicted esterase of the alpha-beta hydrolase superfamily	ADP-RIBOSYLATION FACTOR	Patatin-like phospholipase	similar to Putative uncharacterized protein	catalytic activity,nutrient reservoir activity	None
chromosome_1	3290353	-	G	A	Sb01g004040	0	294	206	69	R	*	None	ORIGIN RECOGNITION COMPLEX SUBUNIT 2	Origin recognition complex subunit 2	similar to Origin recognition complex subunit 2	origin recognition complex,nucleus,DNA replication	None
chromosome_1	3361801	+	C	G	Sb01g004180	2	1027	789	263	S	*	Ubiquitin-like protein	UBIQUITIN	Ubiquitin family	similar to Putative uncharacterized protein	protein modification	None
chromosome_1	3367962	+	C	A	Sb01g004195	1	600	600	200	C	*	None	None	None	Predicted protein	None	None
chromosome_1	3368101	+	A	T	Sb01g004195	0	739	739	247	K	*	None	None	None	Predicted protein	None	None
chromosome_1	3394274	-	G	C	Sb01g004220	1	1498	1100	367	Y	*	None	None	Glycosyl hydrolases family 28	similar to Putative uncharacterized protein	polygalacturonase activity,carbohydrate metabolism	Galacturan 1,4-alpha-galacturonidase.;{(1,4)-alpha-D-galacturonide}(N) + H(2)O = {(1,4)-alpha-D- galacturonide}(N-1) + D-galacturonate.;\N;\N;Starch and sucrose metabolism;Metabolism of Complex Carbohydrates;METABOLIC
chromosome_1	3552738	-	G	T	Sb01g004440	2	296	206	69	S	*	None	IRON-SULFUR DOMAIN CONTAINING PROTEIN	Rieske [2Fe-2S] domain|Pheophorbide a oxygenase	similar to Putative iron-sulfur cluster-binding protein	electron transport,oxidoreductase activity	None
chromosome_1	3659673	+	A	T	Sb01g004566	0	2134	1420	474	R	*	None	None	None	similar to Homeobox transcription factor Hox7-like protein	None	None
chromosome_1	3865969	-	C	A	Sb01g004800	0	7785	2770	924	G	*	Nucleolar protein fibrillarin NOP77 (RRM superfamily)	RNA-BINDING PROTEIN	RNA recognition motif. (a.k.a. RRM, RBD, or RNP domain)|RNA recognition motif. (a.k.a. RRM, RBD, or RNP domain)|RNA recognition motif. (a.k.a. RRM, RBD, or RNP domain)|RNA recognition motif. (a.k.a. RRM, RBD, or RNP domain)	similar to RNA recognition motif family protein, expressed	nucleic acid binding	None
chromosome_1	3868796	-	T	A	Sb01g004800	0	4958	1368	456	R	*	Nucleolar protein fibrillarin NOP77 (RRM superfamily)	RNA-BINDING PROTEIN	RNA recognition motif. (a.k.a. RRM, RBD, or RNP domain)|RNA recognition motif. (a.k.a. RRM, RBD, or RNP domain)|RNA recognition motif. (a.k.a. RRM, RBD, or RNP domain)|RNA recognition motif. (a.k.a. RRM, RBD, or RNP domain)	similar to RNA recognition motif family protein, expressed	nucleic acid binding	None
chromosome_1	3870013	-	G	T	Sb01g004800	2	3741	906	302	S	*	Nucleolar protein fibrillarin NOP77 (RRM superfamily)	RNA-BINDING PROTEIN	RNA recognition motif. (a.k.a. RRM, RBD, or RNP domain)|RNA recognition motif. (a.k.a. RRM, RBD, or RNP domain)|RNA recognition motif. (a.k.a. RRM, RBD, or RNP domain)|RNA recognition motif. (a.k.a. RRM, RBD, or RNP domain)	similar to RNA recognition motif family protein, expressed	nucleic acid binding	None
chromosome_1	3898457	+	G	T	Sb01g004855	0	511	511	171	G	*	None	FAMILY NOT NAMED	None	similar to Putative uncharacterized protein OSJNBa0052F07.7	None	None
chromosome_1	4028380	-	G	T	Sb01g004930	2	2585	728	243	S	*	Cactin	POLYGLUTAMINE BINDING PROTEIN 1/MARVEL (MEMBRANE-ASSOCIATING) DOMAIN CONTAINING 3	None	similar to F21M11.16 protein	None	None
chromosome_1	4072538	-	G	A	Sb01g004990	0	1547	1409	470	R	*	None	None	Protein of unknown function, DUF593	similar to Expressed protein	None	None
chromosome_1	4072595	-	G	A	Sb01g004990	0	1490	1352	451	R	*	None	None	Protein of unknown function, DUF593	similar to Expressed protein	None	None
chromosome_1	4117905	+	C	A	Sb01g005020	1	2429	393	131	Y	*	40S ribosomal protein S15	40S RIBOSOMAL PROTEIN S15	Ribosomal protein S19	similar to 40S ribosomal protein S15	structural constituent of ribosome,intracellular,ribosome,protein biosynthesis,small ribosomal subunit	None
chromosome_1	4159092	-	G	A	Sb01g005084	0	4192	1869	623	R	*	None	None	BAH domain|BAH domain	similar to Cytosine-specific methyltransferase	DNA binding	DNA (cytosine-5-)-methyltransferase.;S-adenosyl-L-methionine + DNA = S-adenosyl-L-homocysteine + DNA containing 5-methylcytosine.;\N;\N;Methionine metabolism;Amino Acid Metabolism;METABOLIC
chromosome_1	4300405	-	C	A	Sb01g005190	0	1634	1149	383	E	*	None	None	Protein of unknown function (DUF506)	similar to Uncharacterized plant-specific domain TIGR01615 family protein, expressed	None	None
chromosome_1	4320766	-	G	T	Sb01g005200	2	4533	1128	376	S	*	Pyruvate kinase	PYRUVATE KINASE	Pyruvate kinase, barrel domain|Pyruvate kinase, alpha/beta domain	similar to Pyruvate kinase	pyruvate kinase activity,glycolysis	Pyruvate kinase.;ATP + pyruvate = ADP + phosphoenolpyruvate.;\N;Hemolytic anemia due to pyruvate kinase deficiency; MIM:266200.;Purine metabolism;Nucleotide Metabolism;METABOLIC,Pyruvate kinase.;ATP + pyruvate = ADP + phosphoenolpyruvate.;\N;Hemolytic anemia due to pyruvate kinase deficiency; MIM:266200.;Glycolysis / Gluconeogenesis;Carbohydrate Metabolism;METABOLIC,Pyruvate kinase.;ATP + pyruvat…
chromosome_1	4392880	-	C	T	Sb01g005290	2	1148	1148	383	W	*	None	PENTATRICOPEPTIDE REPEAT-CONTAINING PROTEIN	PPR repeat|PPR repeat|PPR repeat|PPR repeat|PPR repeat|PPR repeat|PPR repeat|PPR repeat|PPR repeat|PPR repeat|PPR repeat|PPR repeat|PPR repeat	similar to Expressed protein	None	None
chromosome_1	4418987	+	C	T	Sb01g005330	0	2625	1025	342	Q	*	Acetyl-CoA transporter	DRUG TRANSPORTER-RELATED	Major Facilitator Superfamily|BT1 family	similar to Os03g0795000 protein	membrane	None
chromosome_1	4456037	-	C	T	Sb01g005400	1	402	402	134	W	*	None	None	Acetyltransferase (GNAT) family	similar to Os03g0794300 protein	N-acetyltransferase activity	None
chromosome_1	4521584	-	C	T	Sb01g005480	2	289	250	84	W	*	None	None	None	similar to Plant disease resistance polyprotein-like	None	None
chromosome_1	4555569	+	C	T	Sb01g005560	0	2414	1920	640	R	*	Serine/threonine protein kinase	SERINE-THREONINE PROTEIN KINASE, PLANT-TYPE	Leucine Rich Repeat|Leucine Rich Repeat|Leucine Rich Repeat|Leucine Rich Repeat|Leucine Rich Repeat|Leucine Rich Repeat|Leucine Rich Repeat|Leucine Rich Repeat|Leucine Rich Repeat|Leucine Rich Repeat|Leucine Rich Repeat	similar to Leucine-rich repeat transmembrane protein kinase, putative, expressed	protein kinase activity,protein serine/threonine kinase activity,protein-tyrosine kinase activity,ATP binding,protein amino acid phosphorylation	None
chromosome_1	4654243	-	A	T	Sb01g005660	2	1620	1293	431	L	*	None	REVERSE TRANSCRIPTASES	Reverse transcriptase (RNA-dependent DNA polymerase)	weakly similar to Os06g0484800 protein	RNA binding,RNA-directed DNA polymerase activity,RNA-dependent DNA replication	None
chromosome_1	4655011	-	T	A	Sb01g005660	0	852	852	284	K	*	None	REVERSE TRANSCRIPTASES	Reverse transcriptase (RNA-dependent DNA polymerase)	weakly similar to Os06g0484800 protein	RNA binding,RNA-directed DNA polymerase activity,RNA-dependent DNA replication	None
chromosome_1	4665132	+	C	T	Sb01g005670	0	3435	1425	475	R	*	Xanthine dehydrogenase	XANTHINE DEHYDROGENASE	2Fe-2S iron-sulfur cluster binding domain|[2Fe-2S] binding domain|FAD binding domain in molybdopterin dehydrogenase|CO dehydrogenase flavoprotein C-terminal domain|Aldehyde oxidase and xanthine dehydrogenase, a/b hammerhead domain|Aldehyde oxidase and xanthine dehydrogenase, molybdopterin binding domain	similar to Aldehyde oxidase-2	electron transporter activity,iron ion binding,electron transport,oxidoreductase activity	None
chromosome_1	4921762	-	C	A	Sb01g005910	0	1166	378	126	E	*	Protein with predicted involvement in meiosis (GSG1)	FAMILY NOT NAMED	None	similar to Expressed protein	ATP binding,ATP synthesis coupled proton transport,proton-transporting two-sector ATPase complex,hydrogen-transporting ATP synthase activity, rotational mechanism,hydrogen-transporting ATPase activity, rotational mechanism	None
chromosome_1	5069602	-	G	A	Sb01g006070	0	316	315	105	R	*	Serpin	SERINE PROTEASE INHIBITORS, SERPINS	Serpin (serine protease inhibitor)	weakly similar to Serpin	carboxypeptidase A activity,serine-type endopeptidase inhibitor activity,proteolysis and peptidolysis	None
chromosome_1	5143126	-	G	A	Sb01g006175	0	161	161	54	Q	*	None	REVERSE TRANSCRIPTASES	None	weakly similar to Putative polyprotein	None	None
chromosome_1	5272680	-	T	A	Sb01g006260	0	2539	2539	847	K	*	None	PENTATRICOPEPTIDE REPEAT-CONTAINING PROTEIN	PPR repeat|PPR repeat|PPR repeat|PPR repeat|PPR repeat|PPR repeat|PPR repeat|PPR repeat	similar to Putative uncharacterized protein OSJNBa0091J19.16	None	None
chromosome_1	5521241	-	G	T	Sb01g006530	2	3265	2574	858	S	*	None	None	None	weakly similar to Putative uncharacterized protein	None	None
chromosome_1	5607759	+	G	A	Sb01g006655	1	366	366	122	W	*	None	None	None	similar to Transposon protein, putative, CACTA, En/Spm sub-class	None	None
chromosome_1	5640540	-	G	T	Sb01g006690	1	678	678	226	Y	*	Serine/threonine protein kinase	SERINE-THREONINE PROTEIN KINASE, PLANT-TYPE	Leucine rich repeat N-terminal domain|Leucine Rich Repeat|Leucine Rich Repeat|Leucine Rich Repeat|Leucine Rich Repeat|Leucine Rich Repeat|Leucine Rich Repeat|Leucine Rich Repeat|Leucine Rich Repeat|Leucine Rich Repeat|Leucine Rich Repeat|Leucine Rich Repeat|Leucine Rich Repeat|Leucine Rich Repeat|Leucine Rich Repeat|Leucine Rich Repeat|Leucine Rich Repeat|Leucine Rich Repeat|Leucine Rich Repeat|L…	similar to Putative uncharacterized protein	protein kinase activity,protein serine/threonine kinase activity,protein-tyrosine kinase activity,ATP binding,protein amino acid phosphorylation	Phosphotransferases with an alcohol group as acceptor.;\N;\N;\N;Sphingoglycolipid metabolism;Metabolism of Complex Lipids;METABOLIC,Phosphotransferases with an alcohol group as acceptor.;\N;\N;\N;Benzoate degradation via CoA ligation;Biodegradation of Xenobiotics;METABOLIC,Phosphotransferases with an alcohol group as acceptor.;\N;\N;\N;Starch and sucrose metabolism;Metabolism of Complex Carbohydr…
chromosome_1	5668093	+	T	A	Sb01g006710	1	3591	1952	651	Y	*	Serine/threonine protein kinase	SERINE-THREONINE PROTEIN KINASE, PLANT-TYPE	Leucine rich repeat N-terminal domain|Leucine Rich Repeat|Leucine Rich Repeat|Leucine Rich Repeat	similar to Wound and phytochrome signaling involved receptor like kinase	protein kinase activity,protein serine/threonine kinase activity,protein-tyrosine kinase activity,ATP binding,protein amino acid phosphorylation	Phosphotransferases with an alcohol group as acceptor.;\N;\N;\N;Sphingoglycolipid metabolism;Metabolism of Complex Lipids;METABOLIC,Phosphotransferases with an alcohol group as acceptor.;\N;\N;\N;Benzoate degradation via CoA ligation;Biodegradation of Xenobiotics;METABOLIC,Phosphotransferases with an alcohol group as acceptor.;\N;\N;\N;Starch and sucrose metabolism;Metabolism of Complex Carbohydr…
chromosome_1	5702138	-	G	T	Sb01g006770	2	212	212	71	S	*	Serine/threonine protein kinase	SERINE-THREONINE PROTEIN KINASE, PLANT-TYPE	Legume lectin domain|Protein kinase domain|Protein tyrosine kinase	similar to OSIGBa0125M19.6 protein	protein kinase activity,protein serine/threonine kinase activity,protein-tyrosine kinase activity,ATP binding,protein amino acid phosphorylation	None
chromosome_1	5746579	+	C	T	Sb01g006810	0	1205	815	272	R	*	None	None	None	similar to Expressed protein	None	None
chromosome_1	5912696	-	A	T	Sb01g006960	2	1685	348	116	L	*	None	None	Cold acclimation protein WCOR413	similar to Cold acclimation protein COR413-PM1	None	None
chromosome_1	5916826	+	C	A	Sb01g006970	1	801	801	267	C	*	None	PENTATRICOPEPTIDE REPEAT-CONTAINING PROTEIN	None	similar to Putative uncharacterized protein	None	None
chromosome_1	6070253	-	C	A	Sb01g007140	0	3429	819	273	E	*	RNA polymerase I transcription factor UAF	BRG-1 ASSOCIATED FACTOR 60 (BAF60)	SWIB/MDM2 domain|SWIB/MDM2 domain	similar to SWIB complex BAF60b domain-containing protein, putative, expressed	RNA binding,GTP binding,nucleus,signal recognition particle (sensu Eukaryota),SRP-dependent cotranslational protein-membrane targeting	None
chromosome_1	6145737	+	C	T	Sb01g007195	0	1120	448	150	Q	*	None	None	Protein of unknown function (DUF1723)	Predicted protein	None	None
chromosome_1	6200777	-	G	A	Sb01g007245	0	1526	814	272	R	*	None	None	None	Predicted protein	None	None
chromosome_1	6469114	-	G	A	Sb01g007520	0	3006	1779	593	R	*	None	None	Plant protein of unknown function (DUF863)	similar to Expressed protein	None	None
chromosome_1	6495507	-	G	A	Sb01g007540	0	2360	383	128	R	*	26S proteasome regulatory complex, subunit PSMD10	ANKYRIN REPEAT-CONTAINING	Ankyrin repeat|Ankyrin repeat|Ankyrin repeat|Ankyrin repeat|Ankyrin repeat	similar to Putative ankyrin	None	NAD(+) ADP-ribosyltransferase.;NAD(+) + {ADP-D-ribosyl}(N)-acceptor = nicotinamide + {ADP-D-ribosyl}(N+1)-acceptor.;\N;\N;\N;\N;\N
chromosome_1	6547645	-	C	T	Sb01g007610	2	795	678	226	W	*	UDP-glucuronosyl and UDP-glucosyl transferase	GLUCOSYL/GLUCURONOSYL TRANSFERASES	None	similar to Putative glucosyl transferase	electron transport,metabolism,transferase activity, transferring hexosyl groups	Limonoid glucosyltransferase.;UDP-glucose + limonin = glucosyl-limonin + UDP.;\N;\N;\N;\N;\N
chromosome_1	6787599	-	G	A	Sb01g007860	0	86	86	29	Q	*	None	None	None	Predicted protein	None	Histone acetyltransferase.;Acetyl-CoA + histone = CoA + acetyl-histone.;\N;\N;\N;\N;\N
chromosome_1	6871947	+	C	A	Sb01g007900	1	416	294	98	Y	*	None	ISP4 LIKE PROTEIN	OPT oligopeptide transporter protein	similar to Oligopeptide transporter 3, putative, expressed	None	None
chromosome_1	6885980	+	C	T	Sb01g007940	0	574	466	156	R	*	None	None	None	similar to Putative uncharacterized protein OSJNBa0047E24.20	None	None
chromosome_1	6901973	+	G	A	Sb01g007960	2	2639	1095	365	W	*	Predicted alkaloid synthase/Surface mucin Hemomucin	STRICTOSIDINE SYNTHASE-RELATED	Strictosidine synthase	similar to Os03g0750700 protein	biosynthesis,strictosidine synthase activity	Strictosidine synthase.;3-alpha(S)-strictosidine = tryptamine + secologanin.;\N;\N;Terpenoid biosynthesis;Biosynthesis of Secondary Metabolites;METABOLIC
chromosome_1	6907850	-	C	T	Sb01g007970	2	7724	2568	856	W	*	Kinesin-like protein	KINESIN HEAVY CHAIN	Kinesin motor domain	similar to Kinesin-like protein	microtubule motor activity,ATP binding,microtubule associated complex,microtubule-based movement	Plus-end-directed kinesin ATPase.;ATP + H(2)O = ADP + phosphate.;\N;\N;\N;\N;\N
chromosome_1	6928601	-	G	A	Sb01g008000	0	481	369	123	R	*	None	None	None	similar to Putative defective chloroplasts and leaves (DCL) protein	None	None
chromosome_1	6958423	-	C	A	Sb01g008040	0	3001	5241	1747	G	*	None	None	Glycosyl hydrolase family 3 N terminal domain|Glycosyl hydrolase family 3 C terminal domain	similar to Exoglucanase precursor	hydrolase activity, hydrolyzing O-glycosyl compounds,protein binding,carbohydrate metabolism,regulation of apoptosis	Beta-glucosidase.;Hydrolysis of terminal, non-reducing beta-D-glucose residues with release of beta-D-glucose.;\N;\N;Starch and sucrose metabolism;Metabolism of Complex Carbohydrates;METABOLIC,Beta-glucosidase.;Hydrolysis of terminal, non-reducing beta-D-glucose residues with release of beta-D-glucose.;\N;\N;Cyanoamino acid metabolism;Metabolism of Other Amino Acids;METABOLIC,Beta-glucosidase.;Hy…
chromosome_1	6960663	-	G	A	Sb01g008040	0	761	1075	359	Q	*	None	None	Glycosyl hydrolase family 3 N terminal domain|Glycosyl hydrolase family 3 C terminal domain	similar to Exoglucanase precursor	hydrolase activity, hydrolyzing O-glycosyl compounds,protein binding,carbohydrate metabolism,regulation of apoptosis	Beta-glucosidase.;Hydrolysis of terminal, non-reducing beta-D-glucose residues with release of beta-D-glucose.;\N;\N;Starch and sucrose metabolism;Metabolism of Complex Carbohydrates;METABOLIC,Beta-glucosidase.;Hydrolysis of terminal, non-reducing beta-D-glucose residues with release of beta-D-glucose.;\N;\N;Cyanoamino acid metabolism;Metabolism of Other Amino Acids;METABOLIC,Beta-glucosidase.;Hy…
chromosome_1	7241083	+	C	T	Sb01g008410	0	2416	506	169	Q	*	Uncharacterized conserved protein	BEIGE/BEACH-RELATED	Beige/BEACH domain|WD domain, G-beta repeat|WD domain, G-beta repeat|WD domain, G-beta repeat	similar to WD-40 repeat family protein, putative, expressed	None	None
chromosome_1	7306159	+	C	T	Sb01g008470	0	217	217	73	Q	*	None	None	None	Predicted protein	None	None
chromosome_1	7306895	+	C	T	Sb01g008470	0	953	952	318	Q	*	None	None	None	Predicted protein	None	None
chromosome_1	7464554	+	C	T	Sb01g008643	0	163	94	32	Q	*	None	None	None	Predicted protein	None	None
chromosome_1	7467285	+	C	T	Sb01g008646	0	13	13	5	Q	*	None	HELICASE-RELATED	None	similar to Putative uncharacterized protein	None	None
chromosome_1	7485146	-	C	A	Sb01g008660	0	1310	913	305	G	*	None	None	Uncharacterized protein family, UPF0114	similar to Putative uncharacterized protein	structural constituent of ribosome,intracellular,ribosome,protein biosynthesis	None
chromosome_1	7519413	-	C	A	Sb01g008700	0	13137	7782	2594	E	*	None	ATAXIA TELANGIECTASIA MUTATED (ATM)-RELATED	HEAT repeat|HEAT repeat|HEAT repeat|HEAT repeat|HEAT repeat|Phosphatidylinositol 3- and 4-kinase	similar to Phosphatidylinositol 3-and 4-kinase family protein, expressed	phosphotransferase activity, alcohol group as acceptor	1-phosphatidylinositol 3-kinase.;ATP + 1-phosphatidyl-1D-myo-inositol = ADP + 1-phosphatidyl-1D-myo- inositol 3-phosphate.;\N;\N;Inositol phosphate metabolism;Metabolism of Complex Lipids;METABOLIC
chromosome_1	7528310	-	C	T	Sb01g008700	1	4240	4148	1383	W	*	None	ATAXIA TELANGIECTASIA MUTATED (ATM)-RELATED	HEAT repeat|HEAT repeat|HEAT repeat|HEAT repeat|HEAT repeat|Phosphatidylinositol 3- and 4-kinase	similar to Phosphatidylinositol 3-and 4-kinase family protein, expressed	phosphotransferase activity, alcohol group as acceptor	1-phosphatidylinositol 3-kinase.;ATP + 1-phosphatidyl-1D-myo-inositol = ADP + 1-phosphatidyl-1D-myo- inositol 3-phosphate.;\N;\N;Inositol phosphate metabolism;Metabolism of Complex Lipids;METABOLIC
chromosome_1	7530703	-	G	A	Sb01g008700	0	1847	1755	585	Q	*	None	ATAXIA TELANGIECTASIA MUTATED (ATM)-RELATED	HEAT repeat|HEAT repeat|HEAT repeat|HEAT repeat|HEAT repeat|Phosphatidylinositol 3- and 4-kinase	similar to Phosphatidylinositol 3-and 4-kinase family protein, expressed	phosphotransferase activity, alcohol group as acceptor	1-phosphatidylinositol 3-kinase.;ATP + 1-phosphatidyl-1D-myo-inositol = ADP + 1-phosphatidyl-1D-myo- inositol 3-phosphate.;\N;\N;Inositol phosphate metabolism;Metabolism of Complex Lipids;METABOLIC
chromosome_1	7543810	+	C	A	Sb01g008720	2	1824	728	243	S	*	None	None	None	similar to Putative uncharacterized protein OSJNBb0016H12.28	None	None
chromosome_1	7605909	+	C	T	Sb01g008800	0	4442	1015	339	R	*	None	INOSINE-5-MONOPHOSPHATE DEHYDROGENASE RELATED	CBS domain pair	similar to CBS domain containing protein, expressed	None	None
chromosome_1	7763315	+	C	A	Sb01g009025	2	17318	1268	423	S	*	None	None	None	weakly similar to Putative uncharacterized protein	None	None
chromosome_1	7868145	-	G	T	Sb01g009130	1	165	165	55	Y	*	Transcription factor MEIS1 and related HOX domain proteins	HOMEOBOX PROTEIN	Associated with HOX	similar to Homeodomain protein JUBEL1	DNA binding,transcription factor activity,nucleus,regulation of transcription, DNA-dependent	None
chromosome_1	8133774	+	C	T	Sb01g009436	0	3660	3544	1182	Q	*	None	GAG/POL/ENV POLYPROTEIN	Retrotransposon gag protein|Reverse transcriptase (RNA-dependent DNA polymerase)|Integrase core domain|'chromo' (CHRromatin Organisation MOdifier) domain	similar to OSJNBa0059D20.8 protein	chromatin,DNA binding,chromatin binding,RNA binding,RNA-directed DNA polymerase activity,aspartic-type endopeptidase activity,nucleus,RNA-dependent DNA replication,DNA recombination,chromatin assembly or disassembly,proteolysis and peptidolysis	None
chromosome_1	8205247	-	G	A	Sb01g009475	0	13758	256	86	Q	*	Tam3-transposase (Ac family)	None	Protein of unknown function (DUF 659)|hAT family dimerisation domain	weakly similar to Os05g0232800 protein	protein dimerization activity	None
chromosome_1	8272481	+	C	T	Sb01g009520	0	4913	1356	452	Q	*	None	FAMILY NOT NAMED	None	similar to Expressed protein	None	None
chromosome_1	8382019	-	G	A	Sb01g009610	0	1710	951	317	R	*	RNA lariat debranching enzyme	RNA LARIAT DEBRANCHING ENZYME	Calcineurin-like phosphoesterase|Lariat debranching enzyme, C-terminal domain	similar to Lariat debranching enzyme	None	None
chromosome_1	8388322	-	G	A	Sb01g009615	0	601	601	201	Q	*	None	REVERSE TRANSCRIPTASES	None	similar to Os07g0613900 protein	None	None
chromosome_1	8401497	-	G	A	Sb01g009630	0	4119	947	316	Q	*	None	FIP1-LIKE 1 PROTEIN	Fip1 motif	weakly similar to Putative uncharacterized protein	None	None
chromosome_1	8439261	-	G	A	Sb01g009666	0	284	199	67	Q	*	None	None	None	weakly similar to Putative uncharacterized protein	None	None
chromosome_1	8493140	-	C	T	Sb01g009720	1	348	348	116	W	*	None	None	None	weakly similar to Putative uncharacterized protein	None	None
chromosome_1	8512804	-	G	T	Sb01g009740	1	1338	1302	434	Y	*	None	None	GRAS family transcription factor	similar to GRAS family transcription factor, putative	None	None
chromosome_1	8562704	-	G	A	Sb01g009800	0	4970	2361	787	Q	*	None	SWI/SNF COMPLEX-RELATED	SWIRM domain|Zinc finger, ZZ type|Myb-like DNA-binding domain	similar to Myb-like DNA-binding domain, putative	DNA binding,nucleus,zinc ion binding	None
chromosome_1	8630041	-	C	A	Sb01g009860	0	3034	1269	423	E	*	Protein containing adaptin N-terminal region	TRANSLATIONAL ACTIVATOR GCN1-RELATED	HEAT repeat|PBS lyase HEAT-like repeat|HEAT repeat|HEAT repeat|HEAT repeat|PBS lyase HEAT-like repeat|HEAT repeat|HEAT repeat|HEAT repeat|HEAT repeat|HEAT repeat|HEAT repeat|HEAT repeat|PBS lyase HEAT-like repeat|HEAT repeat|HEAT repeat|HEAT repeat|HEAT repeat|HEAT repeat|HEAT repeat|PBS lyase HEAT-like repeat|HEAT repeat|HEAT repeat|PBS lyase HEAT-like repeat|HEAT repeat|HEAT repeat|HEAT repeat|…	similar to HEAT repeat, putative	None	None
chromosome_1	8810805	+	G	T	Sb01g009970	0	1054	271	91	E	*	None	None	DAK2 domain	similar to 3,4-dihydroxy-2-butanone kinase, putative, expressed	glycerone kinase activity,glycerol metabolism	None
chromosome_1	8873849	-	G	A	Sb01g010025	0	75	75	25	R	*	None	NON-LTR RETROELEMENT REVERSE TRANSCRIPTASE RELATED	None	similar to Putative uncharacterized protein	None	None
chromosome_1	8970744	+	T	G	Sb01g010120	1	1725	931	311	Y	*	PHD Zn-finger proteins	PHD/F-BOX CONTAINING PROTEIN	PHD-finger	similar to Os03g0716200 protein	DNA binding,regulation of transcription, DNA-dependent	None
chromosome_1	9079406	-	G	A	Sb01g010240	0	5850	3309	1103	Q	*	Vacuolar sorting protein VPS1, dynamin, and related proteins	DYNAMIN	Dynamin family|Dynamin central region|Dynamin GTPase effector domain	similar to Putative GTP-binding protein	GTPase activity,GTP binding,oxidoreductase activity	None
chromosome_1	9133186	+	C	A	Sb01g010290	1	789	696	232	C	*	Serine/threonine protein kinase	SERINE-THREONINE PROTEIN KINASE, PLANT-TYPE	Leucine rich repeat N-terminal domain|Leucine Rich Repeat|Leucine Rich Repeat|Leucine Rich Repeat|Leucine Rich Repeat|Leucine Rich Repeat|Leucine Rich Repeat|Protein tyrosine kinase|Protein kinase domain	similar to Atypical receptor-like kinase MARK	peroxidase activity,protein kinase activity,protein serine/threonine kinase activity,protein-tyrosine kinase activity,ATP binding,protein amino acid phosphorylation,response to oxidative stress	Phosphotransferases with an alcohol group as acceptor.;\N;\N;\N;Sphingoglycolipid metabolism;Metabolism of Complex Lipids;METABOLIC,Phosphotransferases with an alcohol group as acceptor.;\N;\N;\N;Benzoate degradation via CoA ligation;Biodegradation of Xenobiotics;METABOLIC,Phosphotransferases with an alcohol group as acceptor.;\N;\N;\N;Starch and sucrose metabolism;Metabolism of Complex Carbohydr…
chromosome_1	9149524	-	A	T	Sb01g010310	1	2742	1289	430	Y	*	RNA-binding Ran Zn-finger protein and related proteins	gb def: Asparagine-rich protein (ARP protein)	Zn-finger in Ran binding protein and others|Zn-finger in Ran binding protein and others|Zn-finger in Ran binding protein and others	similar to Zinc finger family protein, putative, expressed	None	None
chromosome_1	9149862	-	T	A	Sb01g010310	0	2404	951	317	K	*	RNA-binding Ran Zn-finger protein and related proteins	gb def: Asparagine-rich protein (ARP protein)	Zn-finger in Ran binding protein and others|Zn-finger in Ran binding protein and others|Zn-finger in Ran binding protein and others	similar to Zinc finger family protein, putative, expressed	None	None
chromosome_1	9203047	-	G	A	Sb01g010390	0	4310	3375	1125	Q	*	Vesicle coat complex COPI, alpha subunit	COATOMER	WD domain, G-beta repeat|WD domain, G-beta repeat|WD domain, G-beta repeat|WD domain, G-beta repeat|WD domain, G-beta repeat|WD domain, G-beta repeat|Coatomer WD associated region|Coatomer (COPI) alpha subunit C-terminus	similar to Coatomer subunit alpha-1	intracellular protein transport,protein transporter activity,COPI vesicle coat	None
chromosome_1	9277394	-	G	A	Sb01g010460	0	2070	1971	657	R	*	Molecular chaperones GRP78/BiP/KAR2, HSP70 superfamily	HEAT SHOCK PROTEIN 70KDA	Hsp70 protein	similar to DnaK protein	ATP binding	None
chromosome_1	9732710	+	C	T	Sb01g010840	0	1158	745	249	R	*	Beta-glucosidase, lactase phlorizinhydrolase, and related proteins	GLYCOSIDE HYDROLASES	Glycosyl hydrolase family 1	similar to Beta-glucosidase	hydrolase activity, hydrolyzing O-glycosyl compounds,carbohydrate metabolism	None
chromosome_1	9758127	-	G	A	Sb01g010870	0	2174	450	150	R	*	Glucose-6-phosphate/phosphate and phosphoenolpyruvate/phosphate antiporter	SOLUTE CARRIER FAMILY 35	Triose-phosphate Transporter family	similar to Expressed protein	None	None
chromosome_1	9906036	-	G	T	Sb01g011025	2	2678	899	300	S	*	Mn2+ and Fe2+ transporters of the NRAMP family	MANGANESE TRANSPORTER	None	similar to Natural resistance-associated macrophage protein, expressed	prephenate dehydratase activity,transporter activity,transport,L-phenylalanine biosynthesis,membrane	None
chromosome_1	9917951	-	G	C	Sb01g011030	2	2982	4596	1532	S	*	None	LIPOXYGENASE	PLAT/LH2 domain|Lipoxygenase	similar to Lipoxygenase	iron ion binding,electron transport,lipoxygenase activity	None
chromosome_1	9954443	+	C	T	Sb01g011070	0	974	294	98	R	*	Acetyltransferase, (GNAT) family	N-TERMINAL ACETYLTRANSFERASE	Acetyltransferase (GNAT) family	similar to Silencing group B protein	N-acetyltransferase activity	None
chromosome_1	10070051	-	G	T	Sb01g011200	1	4326	408	136	Y	*	None	None	None	Predicted protein	None	None
chromosome_1	10201329	-	G	C	Sb01g011360	2	894	477	159	S	*	Xanthine/uracil transporters	PURINE PERMEASE	Permease family	similar to Nucleobase-ascorbate transporter LPE1	transporter activity,transport,membrane	None
chromosome_1	10249430	+	C	T	Sb01g011420	0	680	303	101	R	*	None	None	Protein of unknown function (DUF1336)	similar to Os03g0693000 protein	None	None
chromosome_1	10376184	+	G	A	Sb01g011540	2	2759	852	284	W	*	None	None	None	similar to Expressed protein, having alternative splicing products	None	None
chromosome_1	10433569	-	G	T	Sb01g011610	2	5517	1572	524	S	*	Plasma membrane H+-transporting ATPase	CATION-TRANSPORTING ATPASE	Cation transporter/ATPase, N-terminus|haloacid dehalogenase-like hydrolase	similar to Chromosome chr17 scaffold_101, whole genome shotgun sequence	catalytic activity,ATP binding,cation transport,metabolism,ATPase activity, coupled to transmembrane movement of ions, phosphorylative mechanism,proton transport,membrane,integral to membrane,hydrolase activity, acting on acid anhydrides, catalyzing transmembrane movement of substances,ATPase activity	Proton-exporting ATPase.;ATP + H(2)O + H(+)(In) = ADP + phosphate + H(+)(Out).;Magnesium.;\N;Oxidative phosphorylation;Energy Metabolism;METABOLIC
chromosome_1	10505559	+	C	G	Sb01g011660	2	662	662	221	S	*	None	None	None	Predicted protein	negative regulation of protein biosynthesis,rRNA N-glycosylase activity	None
chromosome_1	10509536	-	T	A	Sb01g011670	0	863	741	247	K	*	None	None	F-box domain	Predicted protein	None	None
chromosome_1	10594735	-	G	C	Sb01g011710	2	839	591	197	S	*	None	5'-AMP-ACTIVATED PROTEIN KINASE , BETA SUBUNIT	None	weakly similar to Isoamylase N-terminal domain containing protein, expressed	None	None
chromosome_1	10630157	-	G	A	Sb01g011750	0	3721	874	292	Q	*	Predicted glutamine synthetase	GMP SYNTHASE-RELATED	Glutamine amidotransferase class-I	similar to Glutamine amidotransferase class-I family protein, expressed	catalytic activity	None
chromosome_1	10633575	-	G	T	Sb01g011750	1	303	204	68	Y	*	Predicted glutamine synthetase	GMP SYNTHASE-RELATED	Glutamine amidotransferase class-I	similar to Glutamine amidotransferase class-I family protein, expressed	catalytic activity	None
chromosome_1	10698420	+	G	T	Sb01g011845	0	2422	642	214	E	*	E3 ubiquitin protein ligase	UBIQUITIN-PROTEIN LIGASE	HECT-domain (ubiquitin-transferase)	similar to Chromosome chr8 scaffold_23, whole genome shotgun sequence	ubiquitin-protein ligase activity,intracellular,protein modification,ubiquitin cycle	None
chromosome_1	10708275	-	G	C	Sb01g011850	1	857	555	185	Y	*	None	ZINC FINGER FYVE DOMAIN CONTAINING PROTEIN	GDSL-like Lipase/Acylhydrolase	similar to Putative proline-rich protein	catalytic activity	None
chromosome_1	10821850	-	G	A	Sb01g011903	0	42	42	14	Q	*	None	UBIQUILIN	None	similar to Ubiquitin family protein, expressed	None	None
chromosome_1	10950309	-	G	A	Sb01g012020	0	987	153	51	R	*	None	CHAPERONE BINDING PROTEIN	Ankyrin repeat|Ankyrin repeat|Ankyrin repeat|Ankyrin repeat|Tetratricopeptide repeat|Tetratricopeptide repeat|Tetratricopeptide repeat|Tetratricopeptide repeat|Tetratricopeptide repeat|Tetratricopeptide repeat	similar to Putative uncharacterized protein	None	None
chromosome_1	10951035	-	G	C	Sb01g012020	2	261	11	4	S	*	None	CHAPERONE BINDING PROTEIN	Ankyrin repeat|Ankyrin repeat|Ankyrin repeat|Ankyrin repeat|Tetratricopeptide repeat|Tetratricopeptide repeat|Tetratricopeptide repeat|Tetratricopeptide repeat|Tetratricopeptide repeat|Tetratricopeptide repeat	similar to Putative uncharacterized protein	None	None
chromosome_1	11052237	-	T	A	Sb01g012120	0	3385	570	190	R	*	Uncharacterized conserved protein	None	Protein of unknown function DUF55	similar to Os03g0676100 protein	None	None
chromosome_1	11331106	+	C	T	Sb01g012270	0	49	49	17	Q	*	None	WD40 REPEAT PROTEIN	None	similar to Putative small nuclear ribonucleoprotein	None	None
chromosome_1	11455320	-	C	T	Sb01g012410	2	1256	906	302	W	*	None	None	F-box domain	weakly similar to Putative uncharacterized protein OSJNBa0039O18.23	None	None
chromosome_1	11460966	-	G	A	Sb01g012420	0	1096	996	332	R	*	None	None	None	weakly similar to Putative uncharacterized protein OSJNBa0039O18.23	None	None
chromosome_1	11461460	-	T	A	Sb01g012420	0	602	602	201	R	*	None	None	None	weakly similar to Putative uncharacterized protein OSJNBa0039O18.23	None	None
chromosome_1	11692013	-	C	T	Sb01g012703	2	527	527	176	W	*	None	None	None	Predicted protein	None	None
chromosome_1	11692428	-	G	A	Sb01g012703	0	112	112	38	Q	*	None	None	None	Predicted protein	None	None
chromosome_1	11692491	-	G	A	Sb01g012703	0	49	49	17	R	*	None	None	None	Predicted protein	None	None
chromosome_1	11768896	+	G	A	Sb01g012750	1	770	540	180	W	*	None	None	None	Predicted protein	None	None
chromosome_1	11769160	+	G	A	Sb01g012750	1	1034	804	268	W	*	None	None	None	Predicted protein	None	None
chromosome_1	11914832	+	G	A	Sb01g012855	1	750	663	221	W	*	None	None	None	Predicted protein	None	None
chromosome_1	11915840	+	C	T	Sb01g012855	0	1758	1603	535	R	*	None	None	None	Predicted protein	None	None
chromosome_1	11999273	-	A	T	Sb01g012970	2	2901	2675	892	L	*	None	None	FAR1 family|SWIM zinc finger	similar to Putative far-red impaired response protein	None	None
chromosome_1	12046002	+	C	T	Sb01g013030	0	1462	675	225	R	*	Uncharacterized conserved protein	FAMILY NOT NAMED	Protein of unknown function (DUF1637)	similar to Putative uncharacterized protein	None	None
chromosome_1	12068276	+	G	A	Sb01g013045	2	650	650	217	W	*	None	REVERSE TRANSCRIPTASES	Reverse transcriptase (RNA-dependent DNA polymerase)	weakly similar to Os07g0115700 protein	nucleic acid binding,RNA binding,RNA-directed DNA polymerase activity,ATP binding,RNA-dependent DNA replication,ATP-dependent helicase activity	None
chromosome_1	12081038	+	A	T	Sb01g013060	0	1305	1075	359	K	*	Serine/threonine protein kinase	SERINE-THREONINE PROTEIN KINASE, PLANT-TYPE	Calcium binding EGF domain|Protein kinase domain|Protein tyrosine kinase	similar to OSJNBa0083N12.1 protein	protein kinase activity,protein serine/threonine kinase activity,protein-tyrosine kinase activity,calcium ion binding,ATP binding,protein amino acid phosphorylation	None
chromosome_1	12120079	-	G	A	Sb01g013085	0	132	132	44	R	*	None	None	Protein of unknown function (DUF1639)	weakly similar to Putative uncharacterized protein	None	None
chromosome_1	12208931	-	A	T	Sb01g013200	2	774	723	241	L	*	None	None	Protein of unknown function, DUF593	similar to Putative uncharacterized protein	None	None
chromosome_1	12222756	-	C	A	Sb01g013210	0	2236	2236	746	G	*	Translation elongation factor 2/ribosome biogenesis protein RIA1 and related proteins	TRANSLATION FACTOR	Elongation factor Tu GTP binding domain|Elongation factor Tu domain 2|Elongation factor G C-terminus	similar to Putative uncharacterized protein	GTP binding,protein biosynthesis	None
chromosome_1	12228040	-	G	T	Sb01g013215	1	5609	1878	626	C	*	None	None	None	similar to Expressed protein	None	None
chromosome_1	12229491	-	C	T	Sb01g013215	1	4158	1433	478	W	*	None	None	None	similar to Expressed protein	None	None
chromosome_1	12344479	-	G	A	Sb01g013310	0	537	351	117	R	*	Uncharacterized conserved protein	FAMILY NOT NAMED	Pyrimidine 5'-nucleotidase (UMPH-1)	similar to Pyrimidine 5'-nucleotidase-related	None	None
chromosome_1	12352781	+	G	T	Sb01g013320	0	4047	474	158	E	*	None	None	Methyl-CpG binding domain	similar to Putative methyl-binding domain protein MBD115	DNA binding	None
chromosome_1	12352868	+	G	T	Sb01g013320	0	4134	561	187	E	*	None	None	Methyl-CpG binding domain	similar to Putative methyl-binding domain protein MBD115	DNA binding	None
chromosome_1	12385543	-	G	A	Sb01g013390	0	3653	1122	374	R	*	Molecular chaperone (DnaJ superfamily)	DNAJ/HSP40	DnaJ domain|DnaJ central domain (4 repeats)|DnaJ C terminal region	similar to DnaJ-related protein ZMDJ1	protein folding,heat shock protein binding,unfolded protein binding	None
chromosome_1	12661352	-	G	T	Sb01g013630	2	1240	1108	370	S	*	None	None	F-box domain	Predicted protein	None	None
chromosome_1	12855506	+	C	T	Sb01g013800	0	680	51	17	Q	*	Vacuolar assembly/sorting protein DID4	SNF7-RELATED	ESCRT-III complex subunit	similar to SNF7 family protein	molecular function unknown	None
chromosome_1	12965236	+	C	G	Sb01g013846	2	161	161	54	S	*	None	None	None	similar to Putative uncharacterized protein	None	None
chromosome_1	12965316	+	C	T	Sb01g013846	0	241	241	81	Q	*	None	None	None	similar to Putative uncharacterized protein	None	None
chromosome_1	12982081	+	G	T	Sb01g013860	0	256	256	86	G	*	Serine/threonine protein kinase	SERINE-THREONINE PROTEIN KINASE, PLANT-TYPE	D-mannose binding lectin|Protein kinase domain|Protein tyrosine kinase	similar to Putative uncharacterized protein	protein kinase activity,protein serine/threonine kinase activity,protein-tyrosine kinase activity,ATP binding,sugar binding,protein amino acid phosphorylation	None
chromosome_1	13184761	-	G	A	Sb01g014010	0	3491	1008	336	R	*	None	None	Integral membrane protein DUF6|Integral membrane protein DUF6	similar to Nodulin, putative, expressed	membrane	None
chromosome_1	13252664	+	A	T	Sb01g014050	0	3707	823	275	R	*	None	None	Integral membrane protein DUF6|Integral membrane protein DUF6	similar to Nodulin, putative, expressed	membrane	None
chromosome_1	13346534	-	C	A	Sb01g014150	0	190	190	64	G	*	Leucine rich repeat proteins, some proteins contain F-box	F-BOX/LEUCINE RICH REPEAT PROTEIN	Leucine Rich Repeat|Leucine Rich Repeat|Leucine Rich Repeat|Leucine Rich Repeat|Leucine Rich Repeat	similar to Leucine Rich Repeat family protein, expressed	None	None
chromosome_1	13426044	-	C	A	Sb01g014220	0	4341	1425	475	E	*	Adaptor protein Enigma and related PDZ-LIM proteins	LIM DOMAIN	Ubiquitin interaction motif|Ubiquitin interaction motif|C1-like domain|LIM domain	similar to Os03g0626600 protein	proteolysis and peptidolysis,metallopeptidase activity,zinc ion binding	None
chromosome_1	13428519	-	C	A	Sb01g014220	0	1866	366	122	E	*	Adaptor protein Enigma and related PDZ-LIM proteins	LIM DOMAIN	Ubiquitin interaction motif|Ubiquitin interaction motif|C1-like domain|LIM domain	similar to Os03g0626600 protein	proteolysis and peptidolysis,metallopeptidase activity,zinc ion binding	None
chromosome_1	13481540	+	G	A	Sb01g014290	2	4918	720	240	W	*	Exocyst protein Sec3	SEC3/SYNTAXIN-RELATED	None	similar to Roothairless 1	None	None
chromosome_1	13629845	-	G	A	Sb01g014358	0	1064	214	72	Q	*	None	None	None	similar to Putative uncharacterized protein	None	None
chromosome_1	13643199	-	G	A	Sb01g014370	0	770	459	153	R	*	None	None	B3 DNA binding domain|B3 DNA binding domain	similar to B3 DNA binding domain containing protein, expressed	DNA binding,regulation of transcription, DNA-dependent	None
chromosome_1	13643203	-	C	T	Sb01g014370	1	766	455	152	W	*	None	None	B3 DNA binding domain|B3 DNA binding domain	similar to B3 DNA binding domain containing protein, expressed	DNA binding,regulation of transcription, DNA-dependent	None
chromosome_1	13667273	-	C	T	Sb01g014383	1	522	284	95	W	*	None	SENTRIN/SUMO-SPECIFIC PROTEASE	None	weakly similar to Putative uncharacterized protein	proteolysis and peptidolysis,cysteine-type peptidase activity	None
chromosome_1	13684164	-	G	A	Sb01g014386	0	1843	1069	357	Q	*	None	None	None	Predicted protein	None	None
chromosome_1	13691678	-	G	C	Sb01g014400	2	2558	1141	381	S	*	None	REVERSE TRANSCRIPTASES	B3 DNA binding domain|B3 DNA binding domain	weakly similar to Putative uncharacterized protein	DNA binding,regulation of transcription, DNA-dependent	None
chromosome_1	13720076	-	T	A	Sb01g014410	0	1420	841	281	K	*	None	None	B3 DNA binding domain|B3 DNA binding domain	weakly similar to Putative auxin response factor	DNA binding,regulation of transcription, DNA-dependent	None
chromosome_1	13725508	-	G	A	Sb01g014420	0	730	258	86	Q	*	None	None	B3 DNA binding domain|B3 DNA binding domain	weakly similar to Putative auxin response factor	DNA binding,regulation of transcription, DNA-dependent	None
chromosome_1	13738292	-	G	T	Sb01g014430	1	1229	562	188	C	*	None	None	B3 DNA binding domain|B3 DNA binding domain	weakly similar to Putative auxin response factor	DNA binding,regulation of transcription, DNA-dependent	None
chromosome_1	13745490	-	G	T	Sb01g014440	1	951	218	73	C	*	None	None	B3 DNA binding domain|B3 DNA binding domain	weakly similar to Putative auxin response factor	DNA binding,regulation of transcription, DNA-dependent	None
chromosome_1	13792565	-	C	T	Sb01g014490	2	926	621	207	W	*	None	None	B3 DNA binding domain|B3 DNA binding domain	weakly similar to Putative transcirption factor	None	None
chromosome_1	13803754	-	G	T	Sb01g014500	2	1803	750	250	S	*	None	None	B3 DNA binding domain|B3 DNA binding domain	similar to Putative uncharacterized protein	DNA binding,regulation of transcription, DNA-dependent	None
chromosome_1	13804536	-	G	T	Sb01g014500	1	1021	563	188	Y	*	None	None	B3 DNA binding domain|B3 DNA binding domain	similar to Putative uncharacterized protein	DNA binding,regulation of transcription, DNA-dependent	None
chromosome_1	13824761	-	C	T	Sb01g014510	2	3752	639	213	W	*	None	None	B3 DNA binding domain|B3 DNA binding domain	Predicted protein	DNA binding,regulation of transcription, DNA-dependent	None
chromosome_1	13925792	+	G	T	Sb01g014610	0	4787	3466	1156	E	*	Uncharacterized conserved protein	None	HEAT repeat|HEAT repeat|HEAT repeat|HEAT repeat	similar to HEAT repeat family protein	transporter activity,transport,membrane	None
chromosome_1	13977788	-	C	T	Sb01g014660	2	1730	1415	472	W	*	Leucine-rich repeat protein	SERINE-THREONINE PROTEIN KINASE, PLANT-TYPE	Leucine rich repeat N-terminal domain|Leucine Rich Repeat|Leucine Rich Repeat|Leucine Rich Repeat|Leucine Rich Repeat|Leucine Rich Repeat|Leucine Rich Repeat|Leucine Rich Repeat|Leucine Rich Repeat|Leucine Rich Repeat|Leucine Rich Repeat|Leucine Rich Repeat|Leucine Rich Repeat|Leucine Rich Repeat|Leucine Rich Repeat|Leucine Rich Repeat|Leucine Rich Repeat|Leucine Rich Repeat|Leucine Rich Repeat|L…	weakly similar to Putative uncharacterized protein	None	None
chromosome_1	13978900	-	A	T	Sb01g014660	2	618	465	155	L	*	Leucine-rich repeat protein	SERINE-THREONINE PROTEIN KINASE, PLANT-TYPE	Leucine rich repeat N-terminal domain|Leucine Rich Repeat|Leucine Rich Repeat|Leucine Rich Repeat|Leucine Rich Repeat|Leucine Rich Repeat|Leucine Rich Repeat|Leucine Rich Repeat|Leucine Rich Repeat|Leucine Rich Repeat|Leucine Rich Repeat|Leucine Rich Repeat|Leucine Rich Repeat|Leucine Rich Repeat|Leucine Rich Repeat|Leucine Rich Repeat|Leucine Rich Repeat|Leucine Rich Repeat|Leucine Rich Repeat|L…	weakly similar to Putative uncharacterized protein	None	None
chromosome_1	14130881	+	C	T	Sb01g014820	0	517	454	152	Q	*	None	None	Zinc knuckle	similar to OSJNBa0065J03.16 protein	nucleic acid binding	None
chromosome_1	14138357	-	G	A	Sb01g014825	0	145	145	49	Q	*	None	WD40 REPEAT PROTEIN	None	similar to Putative small nuclear ribonucleoprotein	None	None
chromosome_1	14172840	-	T	A	Sb01g014850	0	548	548	183	R	*	G2/Mitotic-specific cyclin A	CYCLINS	Cyclin, N-terminal domain|Cyclin, C-terminal domain	similar to Cyclin-A3-1	regulation of cell cycle,nucleus	None
chromosome_1	14337627	-	G	T	Sb01g014995	1	4056	3028	1010	Y	*	None	PENTATRICOPEPTIDE REPEAT-CONTAINING PROTEIN	PPR repeat|PPR repeat|PPR repeat|PPR repeat|PPR repeat|PPR repeat|PPR repeat|PPR repeat|PPR repeat|PPR repeat|PPR repeat|PPR repeat|PPR repeat|PPR repeat|PPR repeat|PPR repeat|PPR repeat|PPR repeat|PPR repeat|PPR repeat|PPR repeat|PPR repeat	similar to Putative pentatricopeptide repeat-containing protein	None	None
chromosome_1	14337789	-	G	T	Sb01g014995	1	3894	2866	956	C	*	None	PENTATRICOPEPTIDE REPEAT-CONTAINING PROTEIN	PPR repeat|PPR repeat|PPR repeat|PPR repeat|PPR repeat|PPR repeat|PPR repeat|PPR repeat|PPR repeat|PPR repeat|PPR repeat|PPR repeat|PPR repeat|PPR repeat|PPR repeat|PPR repeat|PPR repeat|PPR repeat|PPR repeat|PPR repeat|PPR repeat|PPR repeat	similar to Putative pentatricopeptide repeat-containing protein	None	None
chromosome_1	14338424	-	T	A	Sb01g014995	0	3259	2231	744	R	*	None	PENTATRICOPEPTIDE REPEAT-CONTAINING PROTEIN	PPR repeat|PPR repeat|PPR repeat|PPR repeat|PPR repeat|PPR repeat|PPR repeat|PPR repeat|PPR repeat|PPR repeat|PPR repeat|PPR repeat|PPR repeat|PPR repeat|PPR repeat|PPR repeat|PPR repeat|PPR repeat|PPR repeat|PPR repeat|PPR repeat|PPR repeat	similar to Putative pentatricopeptide repeat-containing protein	None	None
chromosome_1	14338445	-	G	A	Sb01g014995	0	3238	2210	737	Q	*	None	PENTATRICOPEPTIDE REPEAT-CONTAINING PROTEIN	PPR repeat|PPR repeat|PPR repeat|PPR repeat|PPR repeat|PPR repeat|PPR repeat|PPR repeat|PPR repeat|PPR repeat|PPR repeat|PPR repeat|PPR repeat|PPR repeat|PPR repeat|PPR repeat|PPR repeat|PPR repeat|PPR repeat|PPR repeat|PPR repeat|PPR repeat	similar to Putative pentatricopeptide repeat-containing protein	None	None
chromosome_1	14377254	-	G	T	Sb01g015000	1	1891	627	209	Y	*	Glycerophosphoryl diester phosphodiesterase	GLYCEROPHOSPHORYL DIESTER PHOSPHODIESTERASE	Glycerophosphoryl diester phosphodiesterase family	similar to Putative phosphodiesterase family	glycerol metabolism,glycerophosphodiester phosphodiesterase activity	Glycerophosphodiester phosphodiesterase.;A glycerophosphodiester + H(2)O = an alcohol + sn-glycerol 3-phosphate.;\N;\N;Phospholipid degradation;Metabolism of Complex Lipids;METABOLIC,Glycerophosphodiester phosphodiesterase.;A glycerophosphodiester + H(2)O = an alcohol + sn-glycerol 3-phosphate.;\N;\N;Glycerolipid metabolism;Metabolism of Complex Lipids;METABOLIC
chromosome_1	14441138	-	G	C	Sb01g015030	2	60	60	20	S	*	Ribokinase	SUGAR KINASE RELATED	pfkB family carbohydrate kinase	similar to PfkB-type carbohydrate kinase family protein, putative, expressed	None	None
chromosome_1	14445781	-	C	A	Sb01g015040	0	3169	1152	384	G	*	Cytochrome P450 CYP4/CYP19/CYP26 subfamilies	CYTOCHROME P450	Cytochrome P450	similar to Cytochrome P450 85A1	monooxygenase activity,electron transport	Acting on paired donors, with incorporation or reduction of;\N;\N;\N;gamma-Hexachlorocyclohexane degradation;Biodegradation of Xenobiotics;METABOLIC,Acting on paired donors, with incorporation or reduction of;\N;\N;\N;Ascorbate and aldarate metabolism;Carbohydrate Metabolism;METABOLIC,Acting on paired donors, with incorporation or reduction of;\N;\N;\N;Flavonoids, stilbene and lignin biosynthesis…
chromosome_1	14706795	+	C	T	Sb01g015200	0	5910	1701	567	R	*	Chromatin-associated protein Dek and related proteins, contains SAP DNA binding domain	FAMILY NOT NAMED	None	similar to Expressed protein	RNA binding,GTP binding,signal recognition particle (sensu Eukaryota),SRP-dependent cotranslational protein-membrane targeting	None
chromosome_1	14713580	-	G	T	Sb01g015210	1	3052	1126	376	Y	*	Putative transcription factor 5qNCA, contains JmjC domain	JUMONJI DOMAIN CONTAINING PROTEIN-RELATED INCLUDING HAIRLESS	JmjC domain	similar to JmjC domain containing protein, expressed	ubiquitin ligase complex,carboxypeptidase A activity,ubiquitin-protein ligase activity,proteolysis and peptidolysis,zinc ion binding,protein ubiquitination	None
chromosome_1	14789142	-	C	T	Sb01g015310	1	288	204	68	W	*	None	CYTOCHROME P450	None	similar to Os03g0593600 protein	monooxygenase activity,electron transport	None
chromosome_1	14992771	-	G	A	Sb01g015460	0	2093	2093	698	R	*	None	None	None	weakly similar to Expressed protein	None	None
chromosome_1	15008550	-	C	A	Sb01g015480	0	15	15	5	G	*	Predicted transposase	FAMILY NOT NAMED	Transposase DDE domain	similar to Transposon protein, putative, CACTA, En/Spm sub-class	DNA binding,transposase activity,DNA transposition	None
chromosome_1	15031225	-	G	A	Sb01g015520	0	5506	1521	507	R	*	DNA helicase	DNA2/NAM7 HELICASE FAMILY	None	similar to Putative DNA helicase	nucleotide binding,DNA binding,ATP binding,ATP-dependent helicase activity,nucleoside-triphosphatase activity	None
chromosome_1	15066392	+	G	A	Sb01g015540	2	11324	3783	1261	W	*	None	None	None	similar to Expressed protein	None	None
chromosome_1	15068477	+	T	A	Sb01g015550	1	1079	829	277	C	*	Apoptotic ATPase	LEUCINE-RICH REPEAT-CONTAINING PROTEIN	NB-ARC domain|Leucine Rich Repeat|Leucine Rich Repeat|Leucine Rich Repeat|Leucine Rich Repeat|Leucine Rich Repeat|Leucine Rich Repeat|Leucine Rich Repeat|Leucine Rich Repeat|Leucine Rich Repeat|Leucine Rich Repeat|Leucine Rich Repeat|Leucine Rich Repeat|Leucine Rich Repeat|Leucine Rich Repeat|Leucine Rich Repeat|Leucine Rich Repeat|Leucine Rich Repeat|Leucine Rich Repeat	Predicted protein	cysteine-type endopeptidase activity,ATP binding,proteolysis and peptidolysis,apoptosis,defense response,defense response to pathogen	None
chromosome_1	15184496	+	G	A	Sb01g015590	1	4847	1797	599	W	*	None	RETICULON/NOGO	None	similar to Expressed protein	None	None
chromosome_1	15185773	+	C	T	Sb01g015600	0	7	7	3	Q	*	None	SERINE-THREONINE PROTEIN KINASE, PLANT-TYPE	Leucine Rich Repeat|Leucine Rich Repeat	similar to Putative uncharacterized protein P0009G03.26	None	None
chromosome_1	15438284	-	G	A	Sb01g015840	0	2282	1213	405	Q	*	None	None	None	similar to Putative reverse transcriptase	None	None
chromosome_1	15449837	+	G	T	Sb01g015855	0	217	217	73	E	*	None	UNCHARACTERIZED	None	similar to CDNA FLJ45698 fis, clone FEBRA2017811.	None	None
chromosome_1	15481046	-	G	A	Sb01g015880	0	839	612	204	R	*	None	None	FAR1 family	weakly similar to Transposon protein, putative, unclassified, expressed	None	None
chromosome_1	15490111	-	G	A	Sb01g015893	0	1196	464	155	Q	*	None	LEUCINE-RICH REPEAT-CONTAINING PROTEIN	None	similar to Putative disease resistance complex protein	defense response,defense response to pathogen	None
chromosome_1	15552476	-	C	A	Sb01g015930	0	1863	684	228	E	*	None	None	Methyl-CpG binding domain|Methyl-CpG binding domain	similar to OSIGBa0138E08-OSIGBa0161L23.6 protein	DNA binding	None
chromosome_1	15817518	+	G	A	Sb01g016040	1	84	84	28	W	*	None	None	Auxin responsive protein	similar to Auxin induced protein	None	None
chromosome_1	15833328	-	G	A	Sb01g016055	0	298	298	100	Q	*	None	None	FAR1 family	similar to Os03g0164400 protein	None	None
chromosome_1	15835770	-	C	T	Sb01g016060	1	3214	2935	979	W	*	Apoptotic ATPase	LEUCINE-RICH REPEAT-CONTAINING PROTEIN	NB-ARC domain|Leucine Rich Repeat|Leucine Rich Repeat|Leucine Rich Repeat|Leucine Rich Repeat|Leucine Rich Repeat|Leucine Rich Repeat|Leucine Rich Repeat|Leucine Rich Repeat|Leucine Rich Repeat|Leucine Rich Repeat	weakly similar to Putative uncharacterized protein	ATP binding,apoptosis,defense response,defense response to pathogen	None
chromosome_1	15907878	-	G	C	Sb01g016120	2	1481	1119	373	S	*	Uncharacterized membrane protein, predicted efflux pump	MULTIDRUG RESISTANCE PUMP	MatE|MatE	similar to Os03g0571900 protein	multidrug transport,drug transporter activity,antiporter activity,membrane	None
chromosome_1	15920496	+	C	A	Sb01g016140	2	6062	1499	500	S	*	Uncharacterized membrane protein, predicted efflux pump	MULTIDRUG RESISTANCE PUMP	MatE|MatE	similar to MATE efflux family protein, expressed	multidrug transport,drug transporter activity,antiporter activity,membrane	None
chromosome_1	15952911	-	G	A	Sb01g016180	0	1889	1832	611	R	*	None	PENTATRICOPEPTIDE REPEAT-CONTAINING PROTEIN	Tetratricopeptide repeat|Tetratricopeptide repeat|Tetratricopeptide repeat|PPR repeat|PPR repeat|PPR repeat|PPR repeat|PPR repeat|PPR repeat|PPR repeat|PPR repeat|PPR repeat|PPR repeat|PPR repeat|PPR repeat|PPR repeat	similar to Pentatricopeptide, putative, expressed	None	None
chromosome_1	16428811	+	C	T	Sb01g016390	0	3540	1159	387	Q	*	None	None	None	weakly similar to Putative uncharacterized protein	None	None
chromosome_1	16469636	-	G	T	Sb01g016420	1	2152	1282	428	C	*	Acyl-CoA synthetase	AMP DEPENDENT LIGASE/SYNTHETASE	AMP-binding enzyme	similar to Putative uncharacterized protein	catalytic activity,metabolism	4-coumarate--CoA ligase.;ATP + 4-coumarate + CoA = AMP + diphosphate + 4-coumaroyl-CoA.;\N;\N;Flavonoids, stilbene and lignin biosynthesis;Biosynthesis of Secondary Metabolites;METABOLIC
chromosome_1	16505494	-	G	A	Sb01g016455	0	10196	1776	592	R	*	None	None	None	Predicted protein	None	None
chromosome_1	16505575	-	C	A	Sb01g016455	0	10115	1695	565	E	*	None	None	None	Predicted protein	None	None
chromosome_1	16506108	-	C	T	Sb01g016455	1	9582	1399	467	W	*	None	None	None	Predicted protein	None	None
chromosome_1	16515454	-	C	T	Sb01g016455	2	236	236	79	W	*	None	None	None	Predicted protein	None	None
chromosome_1	16534546	+	C	T	Sb01g016464	0	1345	1345	449	Q	*	None	None	Whi5 like|Transposase family tnp2	weakly similar to P0650D04.19 protein	None	None
chromosome_1	16539039	+	G	A	Sb01g016466	2	656	656	219	W	*	None	None	None	Predicted protein	None	None
chromosome_1	16539338	+	C	T	Sb01g016466	0	955	955	319	Q	*	None	None	None	Predicted protein	None	None
chromosome_1	16539413	+	G	T	Sb01g016466	0	1030	1030	344	E	*	None	None	None	Predicted protein	None	None
chromosome_1	16624858	-	C	T	Sb01g016500	2	4537	1156	386	W	*	Predicted mutarotase	ALDOSE-1-EPIMERASE	Aldose 1-epimerase	similar to Os09g0108600 protein	aldose 1-epimerase activity,galactose metabolism	Aldose 1-epimerase.;Alpha-D-glucose = beta-D-glucose.;\N;\N;Glycolysis / Gluconeogenesis;Carbohydrate Metabolism;METABOLIC
chromosome_1	16625037	-	C	T	Sb01g016500	1	4358	977	326	W	*	Predicted mutarotase	ALDOSE-1-EPIMERASE	Aldose 1-epimerase	similar to Os09g0108600 protein	aldose 1-epimerase activity,galactose metabolism	Aldose 1-epimerase.;Alpha-D-glucose = beta-D-glucose.;\N;\N;Glycolysis / Gluconeogenesis;Carbohydrate Metabolism;METABOLIC
chromosome_1	16642192	+	C	A	Sb01g016530	1	456	441	147	Y	*	Predicted RNA-binding protein	LUPUS LA RIBONUCLEOPROTEIN	La domain|RNA recognition motif. (a.k.a. RRM, RBD, or RNP domain)	similar to RNA-binding protein, putative, expressed	None	None
chromosome_1	16732153	+	G	A	Sb01g016580	2	461	461	154	W	*	None	None	Domain of unknown function DUF26|Domain of unknown function DUF26	similar to Os03g0564600 protein	None	None
chromosome_1	16748724	-	C	T	Sb01g016610	2	768	723	241	W	*	None	COATOMER BETA SUBUNIT	HEAT repeat	Predicted protein	None	None
chromosome_1	16923332	+	C	A	Sb01g016770	1	3509	1419	473	C	*	Transporter, ABC superfamily (Breast cancer resistance protein)	ATP-BINDING CASSETTE TRANSPORTER	ABC transporter|ABC-2 type transporter	similar to PDR-like ABC transporter, putative, expressed	nucleotide binding,ATP binding,ATPase activity,nucleoside-triphosphatase activity	None
chromosome_1	16970985	-	G	T	Sb01g016780	1	2646	787	263	C	*	40S ribosomal protein S2/30S ribosomal protein S5	RIBOSOMAL S SUBUNIT	Ribosomal protein S5, N-terminal domain|Ribosomal protein S5, C-terminal domain	similar to Putative ribosomal protein S5	structural constituent of ribosome,intracellular,ribosome,protein biosynthesis,small ribosomal subunit	None
chromosome_1	16992640	-	G	A	Sb01g016800	0	3195	2701	901	Q	*	None	None	SWIM zinc finger	similar to H0322F07.9 protein	transposase activity,DNA transposition	None
chromosome_1	17031487	-	G	A	Sb01g016840	0	3256	1011	337	R	*	Tumor differentially expressed (TDE) protein	TUMOR DIFFERENTIALLY EXPRESSED PROTEIN-RELATED	Serine incorporator (Serinc)	similar to Putative membrane protein	membrane	None
chromosome_1	17218918	+	C	A	Sb01g017000	2	158	158	53	S	*	None	None	SWIM zinc finger|Zinc knuckle|Protein of unknown function (DUF1723)	Predicted protein	nucleic acid binding	None
chromosome_1	17301950	+	C	T	Sb01g017075	0	563	409	137	Q	*	None	None	None	Predicted protein	DNA binding,nucleus	None
chromosome_1	17494225	+	G	A	Sb01g017113	2	80	80	27	W	*	None	None	None	Predicted protein	None	None
chromosome_1	17604132	-	G	A	Sb01g017180	0	1310	1275	425	Q	*	Cytochrome P450 CYP2 subfamily	CYTOCHROME P450	Cytochrome P450	similar to Putative uncharacterized protein	monooxygenase activity,electron transport	Acting on paired donors, with incorporation or reduction of;\N;\N;\N;gamma-Hexachlorocyclohexane degradation;Biodegradation of Xenobiotics;METABOLIC,Acting on paired donors, with incorporation or reduction of;\N;\N;\N;Ascorbate and aldarate metabolism;Carbohydrate Metabolism;METABOLIC,Acting on paired donors, with incorporation or reduction of;\N;\N;\N;Flavonoids, stilbene and lignin biosynthesis…
chromosome_1	17807499	-	G	A	Sb01g017300	0	3173	1179	393	Q	*	Hydrolytic enzymes of the alpha/beta hydrolase fold	PROTEASE S28 PRO-X CARBOXYPEPTIDASE-RELATED	Serine carboxypeptidase S28	similar to Prolyl carboxypeptidase like protein, putative, expressed	proteolysis and peptidolysis,serine-type peptidase activity	Acting on peptide bonds (peptide hydrolases).;\N;\N;\N;Biotin metabolism;Metabolism of Cofactors and Vitamins;METABOLIC,Acting on peptide bonds (peptide hydrolases).;\N;\N;\N;Lysine degradation;Amino Acid Metabolism;METABOLIC
chromosome_1	17809497	-	G	A	Sb01g017300	0	1175	457	153	Q	*	Hydrolytic enzymes of the alpha/beta hydrolase fold	PROTEASE S28 PRO-X CARBOXYPEPTIDASE-RELATED	Serine carboxypeptidase S28	similar to Prolyl carboxypeptidase like protein, putative, expressed	proteolysis and peptidolysis,serine-type peptidase activity	Acting on peptide bonds (peptide hydrolases).;\N;\N;\N;Biotin metabolism;Metabolism of Cofactors and Vitamins;METABOLIC,Acting on peptide bonds (peptide hydrolases).;\N;\N;\N;Lysine degradation;Amino Acid Metabolism;METABOLIC
chromosome_1	17812156	-	G	A	Sb01g017310	0	4855	1383	461	R	*	Hydrolytic enzymes of the alpha/beta hydrolase fold	PROTEASE S28 PRO-X CARBOXYPEPTIDASE-RELATED	Serine carboxypeptidase S28	similar to Prolyl carboxypeptidase like protein, putative, expressed	catalytic activity,proteolysis and peptidolysis,serine-type peptidase activity	Acting on peptide bonds (peptide hydrolases).;\N;\N;\N;Biotin metabolism;Metabolism of Cofactors and Vitamins;METABOLIC,Acting on peptide bonds (peptide hydrolases).;\N;\N;\N;Lysine degradation;Amino Acid Metabolism;METABOLIC
chromosome_1	17892769	-	G	A	Sb01g017380	0	286	174	58	R	*	Actin and related proteins	ACTIN	Actin	similar to Actin-1	motor activity,structural constituent of cytoskeleton,protein binding,actin filament	None
chromosome_1	17909927	-	G	A	Sb01g017430	0	2778	831	277	R	*	Actin and related proteins	ACTIN	Actin	similar to Actin-1	motor activity,structural constituent of cytoskeleton,protein binding,actin filament	None
chromosome_1	17961539	+	C	T	Sb01g017445	0	127	127	43	Q	*	None	None	None	similar to Putative uncharacterized protein	None	None
chromosome_1	18011375	-	T	A	Sb01g017480	0	4615	1524	508	R	*	None	DNA MISMATCH REPAIR MUTS RELATED PROTEINS	None	similar to Putative uncharacterized protein	damaged DNA binding,ATP binding,DNA metabolism,mismatch repair	None
chromosome_1	18050122	+	A	T	Sb01g017540	0	2228	910	304	K	*	Beta-tubulin folding cofactor D	BETA-TUBULIN COFACTOR D	HEAT repeat|HEAT repeat|HEAT repeat|HEAT repeat|HEAT repeat	similar to Os10g0508500 protein	None	None
chromosome_1	18115317	+	C	T	Sb01g017555	0	34	34	12	Q	*	None	None	None	Predicted protein	None	None
chromosome_1	18157062	-	G	A	Sb01g017605	0	475	475	159	Q	*	None	None	FAR1 family	similar to Putative uncharacterized protein	None	None
chromosome_1	18327217	-	G	A	Sb01g017750	0	523	523	175	Q	*	None	None	None	weakly similar to OSJNBa0050F15.15 protein	None	None
chromosome_1	18474368	+	G	A	Sb01g017825	2	164	164	55	W	*	None	None	None	Predicted protein	None	None
chromosome_1	18695442	-	G	A	Sb01g018030	0	891	471	157	R	*	None	FAMILY NOT NAMED	Ribosomal protein S18	weakly similar to Putative uncharacterized protein	structural constituent of ribosome,intracellular,ribosome,protein biosynthesis	None
chromosome_1	18695547	-	G	A	Sb01g018030	0	786	366	122	R	*	None	FAMILY NOT NAMED	Ribosomal protein S18	weakly similar to Putative uncharacterized protein	structural constituent of ribosome,intracellular,ribosome,protein biosynthesis	None
chromosome_1	18862890	-	G	C	Sb01g018140	2	1350	624	208	S	*	None	ALPHA/BETA HYDROLASE RELATED	None	similar to Putative uncharacterized protein	catalytic activity	None
chromosome_1	18882240	-	G	A	Sb01g018200	0	2965	915	305	Q	*	Prolyl 4-hydroxylase alpha subunit	PROLYL 4-HYDROXYLASE ALPHA SUBUNIT	2OG-Fe(II) oxygenase superfamily	similar to Prolyl 4-hydroxylase alpha subunit, putative, expressed	oxidoreductase activity, acting on paired donors, with incorporation or reduction of molecular oxygen, 2-oxoglutarate as one donor, and incorporation of one atom each of oxygen into both donors,protein metabolism	Procollagen-proline,2-oxoglutarate-4-dioxygenase.;Procollagen L-proline + 2-oxoglutarate + O(2) = procollagen trans-4- hydroxy-L-proline + succinate + CO(2).;Iron; Ascorbate.;\N;Arginine and proline metabolism;Amino Acid Metabolism;METABOLIC
chromosome_1	18928124	+	C	G	Sb01g018240	2	729	218	73	S	*	None	None	Dof domain, zinc finger	similar to Os10g0496000 protein	DNA binding	None
chromosome_1	19127668	-	G	A	Sb01g018395	0	2868	3086	1029	Q	*	None	REPLICATION FACTOR A 1, RFA1	None	Predicted protein	nucleic acid binding	None
chromosome_1	19151506	-	G	A	Sb01g018410	0	792	402	134	R	*	Alpha-D-galactosidase (melibiase)	ALPHA-GALACTOSIDASE/ALPHA-N-ACETYLGALACTOSAMINIDASE	None	similar to Putative alpha-galactosidase	hydrolase activity, hydrolyzing O-glycosyl compounds,carbohydrate metabolism	Alpha-galactosidase.;Melibiose + H(2)O = galactose + glucose.;Magnesium; NAD.;Diffuse angiokeratoma (Fabry disease); MIM:301500.;Galactose metabolism;Carbohydrate Metabolism;METABOLIC,Alpha-galactosidase.;Melibiose + H(2)O = galactose + glucose.;Magnesium; NAD.;Diffuse angiokeratoma (Fabry disease); MIM:301500.;Glycerolipid metabolism;Metabolism of Complex Lipids;METABOLIC,Alpha-galactosidase.;Me…
chromosome_1	19181084	-	C	A	Sb01g018440	0	1900	1566	522	G	*	Serine/threonine protein kinase	SERINE-THREONINE PROTEIN KINASE, PLANT-TYPE	Leucine rich repeat N-terminal domain|Leucine Rich Repeat|Leucine Rich Repeat|Leucine Rich Repeat|Leucine Rich Repeat|Leucine Rich Repeat	similar to Protein kinase domain containing protein, expressed	protein kinase activity,protein serine/threonine kinase activity,protein-tyrosine kinase activity,ATP binding,protein amino acid phosphorylation	Phosphotransferases with an alcohol group as acceptor.;\N;\N;\N;Sphingoglycolipid metabolism;Metabolism of Complex Lipids;METABOLIC,Phosphotransferases with an alcohol group as acceptor.;\N;\N;\N;Benzoate degradation via CoA ligation;Biodegradation of Xenobiotics;METABOLIC,Phosphotransferases with an alcohol group as acceptor.;\N;\N;\N;Starch and sucrose metabolism;Metabolism of Complex Carbohydr…
chromosome_1	19280574	+	C	T	Sb01g018513	0	368	262	88	R	*	None	None	None	Predicted protein	None	None
chromosome_1	19301776	+	C	T	Sb01g018540	0	1637	1399	467	Q	*	None	None	FAR1 family|SWIM zinc finger	weakly similar to Putative uncharacterized protein	None	None
chromosome_1	19590350	-	C	A	Sb01g018730	0	4578	783	261	G	*	Protein arginine N-methyltransferase PRMT1 and related enzymes	PROTEIN ARGININE N-METHYLTRANSFERASE	Methyltransferase domain|Methyltransferase domain	similar to Probable protein arginine N-methyltransferase 6.2	S-adenosylmethionine-dependent methyltransferase activity	Methyltransferases.;\N;\N;\N;Androgen and estrogen metabolism;Lipid Metabolism;METABOLIC,Methyltransferases.;\N;\N;\N;Aminophosphonate metabolism;Metabolism of Other Amino Acids;METABOLIC,Methyltransferases.;\N;\N;\N;Porphyrin and chlorophyll metabolism;Metabolism of Cofactors and Vitamins;METABOLIC,Methyltransferases.;\N;\N;\N;Ubiquinone biosynthesis;Metabolism of Cofactors and Vitamins;METABOLI…
chromosome_1	19738699	-	G	A	Sb01g018820	0	1457	522	174	R	*	None	NIBRIN-RELATED	FHA domain|BRCA1 C Terminus (BRCT) domain	similar to DNA damage signaling and repair protein	None	None
chromosome_1	19788884	-	G	A	Sb01g018873	0	792	147	49	Q	*	None	NON-LTR RETROELEMENT REVERSE TRANSCRIPTASE RELATED	None	Predicted protein	None	None
chromosome_1	20239807	-	A	T	Sb01g019120	1	3211	957	319	Y	*	None	HOMEOBOX PROTEIN	Homeobox domain|bZIP transcription factor|START domain|MEKHLA domain	similar to Homeodomain leucine-zipper protein Hox9	DNA binding,transcription factor activity,nucleus,regulation of transcription, DNA-dependent	None
chromosome_1	20399961	+	C	T	Sb01g019200	0	851	459	153	Q	*	None	UBIQUITIN SPECIFIC PROTEASE FAMILY C19-RELATED	MATH domain|MATH domain	Predicted protein	None	None
chromosome_1	20488805	-	C	T	Sb01g019265	2	395	395	132	W	*	None	None	None	Predicted protein	None	None
chromosome_1	20783683	+	G	A	Sb01g019350	2	548	548	183	W	*	None	None	None	weakly similar to Putative uncharacterized protein	None	None
chromosome_1	20826614	-	C	T	Sb01g019390	1	1297	215	72	W	*	Casein kinase (serine/threonine/tyrosine protein kinase)	CASEIN KINASE-RELATED	Protein kinase domain	similar to Casein kinase I, epsilon isoform, putative, expressed	structural constituent of ribosome,protein kinase activity,protein serine/threonine kinase activity,protein-tyrosine kinase activity,ATP binding,intracellular,ribosome,protein biosynthesis,protein amino acid phosphorylation	None
chromosome_1	20871392	-	G	C	Sb01g019440	2	2240	644	215	S	*	Ubiquitin-like protein	UBIQUITIN	Ubiquitin family|Ubiquitin family|Ubiquitin family	similar to Ubiquitin family protein, expressed	protein modification	None
chromosome_1	20887302	+	C	G	Sb01g019460	1	60	60	20	Y	*	Glucose dehydrogenase/choline dehydrogenase/mandelonitrile lyase (GMC oxidoreductase family)	PHYTOENE DEHYDROGENASE	GMC oxidoreductase	similar to GMC oxidoreductase family protein, expressed	None	Cholesterol oxidase.;Cholesterol + O(2) = cholest-4-en-3-one + H(2)O(2).;FAD.;\N;Bile acid biosynthesis;Lipid Metabolism;METABOLIC
chromosome_1	21213619	+	C	T	Sb01g019545	0	259	259	87	Q	*	None	FAMILY NOT NAMED	None	weakly similar to Chromosome chr4 scaffold_6, whole genome shotgun sequence	None	None
chromosome_1	21538584	-	C	A	Sb01g019710	0	935	234	78	E	*	Nuclear localization sequence binding protein	RNA-BINDING PROTEIN	RNA recognition motif. (a.k.a. RRM, RBD, or RNP domain)|RNA recognition motif. (a.k.a. RRM, RBD, or RNP domain)	similar to H0714H04.9 protein	nucleic acid binding	None
chromosome_1	21591691	-	G	A	Sb01g019760	0	713	713	238	Q	*	None	None	None	Predicted protein	None	None
chromosome_1	21592174	-	G	A	Sb01g019760	0	230	230	77	Q	*	None	None	None	Predicted protein	None	None
chromosome_1	21824644	+	G	A	Sb01g019890	2	29	29	10	W	*	None	REVERSE TRANSCRIPTASES	None	weakly similar to Putative uncharacterized protein	None	None
chromosome_1	21825216	+	C	T	Sb01g019890	0	601	295	99	Q	*	None	REVERSE TRANSCRIPTASES	None	weakly similar to Putative uncharacterized protein	None	None
chromosome_1	22102895	-	C	T	Sb01g020093	2	135	135	45	W	*	None	POLYPROTEIN	None	similar to Putative GAG-POL-orf2 protein	None	None
chromosome_1	22251218	+	G	A	Sb01g020130	1	2444	2148	716	W	*	DNA helicase PIF1/RRM3	HELICASE-RELATED	Eukaryotic protein of unknown function (DUF889)	similar to AT hook motif-containing protein, putative	None	None
chromosome_1	22303052	-	G	A	Sb01g020150	0	3147	1209	403	Q	*	3-oxoacyl CoA thiolase	ACETYL-COA C-ACYLTRANSFERASE	Thiolase, N-terminal domain|Thiolase, C-terminal domain	similar to Putative uncharacterized protein	None	None
chromosome_1	22327180	-	G	A	Sb01g020190	0	223	103	35	Q	*	Splicing factor 3b, subunit 4	RNA-BINDING PROTEIN	RNA recognition motif. (a.k.a. RRM, RBD, or RNP domain)|RNA recognition motif. (a.k.a. RRM, RBD, or RNP domain)	similar to Splicing factor 3B subunit 4, putative, expressed	nucleic acid binding	None
chromosome_1	22357421	-	G	T	Sb01g020230	1	2028	459	153	Y	*	Glutamine synthetase	GLUTAMINE SYNTHETASE	Amidohydrolase|Glutamine synthetase, catalytic domain	similar to Os10g0456500 protein	subtilase activity,glutamate-ammonia ligase activity,proteolysis and peptidolysis,glutamine biosynthesis,nitrogen compound metabolism	None
chromosome_1	22368941	-	G	A	Sb01g020250	0	397	397	133	Q	*	None	None	SWIM zinc finger	similar to Putative uncharacterized protein	None	None
chromosome_1	22709116	+	C	T	Sb01g020392	0	457	361	121	R	*	None	None	None	Predicted protein	None	None
chromosome_1	22709636	+	G	A	Sb01g020392	2	977	881	294	W	*	None	None	None	Predicted protein	None	None
chromosome_1	22746978	-	C	A	Sb01g020398	0	88	88	30	E	*	None	None	None	weakly similar to OSIGBa0103I21.5 protein	None	None
chromosome_1	22813806	-	G	A	Sb01g020420	0	88	88	30	Q	*	None	None	None	Predicted protein	None	None
chromosome_1	22867108	+	C	T	Sb01g020440	0	781	781	261	R	*	None	ZINC FINGER PROTEIN	hAT family dimerisation domain	similar to Putative uncharacterized protein	nucleic acid binding,protein dimerization activity	None
chromosome_1	22971122	-	G	T	Sb01g020470	2	806	806	269	S	*	None	None	None	Predicted protein	DNA binding,intracellular	None
chromosome_1	23131615	-	G	A	Sb01g020505	0	297	192	64	Q	*	None	None	None	similar to Expressed protein	None	None
chromosome_1	23162739	+	C	T	Sb01g020530	0	807	408	136	R	*	Predicted E3 ubiquitin ligase	UNCHARACTERIZED	Zinc finger, C3HC4 type (RING finger)	similar to RNA-binding protein, putative, expressed	ubiquitin ligase complex,ubiquitin-protein ligase activity,zinc ion binding,protein ubiquitination	None
chromosome_1	23189836	-	G	A	Sb01g020552	0	877	526	176	Q	*	None	None	None	similar to Putative reverse transcriptase	None	None
chromosome_1	23336254	-	G	A	Sb01g020593	0	475	475	159	Q	*	None	None	None	Predicted protein	zinc ion binding,oxidoreductase activity	None
chromosome_1	23442858	-	G	A	Sb01g020600	0	461	292	98	R	*	None	None	None	Predicted protein	None	None
chromosome_1	23458699	-	C	T	Sb01g020651	2	830	830	277	W	*	None	None	None	Predicted protein	None	None
chromosome_1	23584566	+	C	A	Sb01g020751	1	540	540	180	C	*	None	REVERSE TRANSCRIPTASES	Reverse transcriptase (RNA-dependent DNA polymerase)	Predicted protein	RNA binding,RNA-directed DNA polymerase activity,RNA-dependent DNA replication	None
chromosome_1	23586456	+	G	T	Sb01g020751	0	2430	2122	708	E	*	None	REVERSE TRANSCRIPTASES	Reverse transcriptase (RNA-dependent DNA polymerase)	Predicted protein	RNA binding,RNA-directed DNA polymerase activity,RNA-dependent DNA replication	None
chromosome_1	23881904	+	C	T	Sb01g020860	0	2858	727	243	Q	*	None	None	None	Predicted protein	None	None
chromosome_1	23885908	-	G	A	Sb01g020870	0	8060	562	188	Q	*	None	None	Arabidopsis proteins of unknown function	Predicted protein	None	None
chromosome_1	23896186	-	G	A	Sb01g020875	0	2493	1738	580	R	*	None	None	None	Predicted protein	None	None
chromosome_1	23896881	-	G	A	Sb01g020875	0	1798	1358	453	R	*	None	None	None	Predicted protein	None	None
chromosome_1	23897775	-	G	A	Sb01g020875	0	904	820	274	R	*	None	None	None	Predicted protein	None	None
chromosome_1	23898051	-	G	A	Sb01g020875	0	628	544	182	Q	*	None	None	None	Predicted protein	None	None
chromosome_1	23898461	-	G	A	Sb01g020875	0	218	218	73	Q	*	None	None	None	Predicted protein	None	None
chromosome_1	23934912	+	C	A	Sb01g020900	1	498	498	166	Y	*	Serine/threonine protein kinase	SERINE-THREONINE PROTEIN KINASE, PLANT-TYPE	Protein kinase domain|Protein tyrosine kinase	similar to Protein kinase domain containing protein, expressed	protein kinase activity,protein serine/threonine kinase activity,protein-tyrosine kinase activity,ATP binding,protein amino acid phosphorylation	Phosphotransferases with an alcohol group as acceptor.;\N;\N;\N;Sphingoglycolipid metabolism;Metabolism of Complex Lipids;METABOLIC,Phosphotransferases with an alcohol group as acceptor.;\N;\N;\N;Benzoate degradation via CoA ligation;Biodegradation of Xenobiotics;METABOLIC,Phosphotransferases with an alcohol group as acceptor.;\N;\N;\N;Starch and sucrose metabolism;Metabolism of Complex Carbohydr…
chromosome_1	23986509	+	C	T	Sb01g020925	0	1687	1060	354	R	*	None	None	None	Predicted protein	None	None
chromosome_1	23987580	+	T	A	Sb01g020925	1	2758	1725	575	Y	*	None	None	None	Predicted protein	None	None
chromosome_1	24249814	-	C	T	Sb01g020990	1	1666	773	258	W	*	Synaptic vesicle transporter SV2 (major facilitator superfamily)	SUGAR TRANSPORTER	Sugar (and other) transporter|Major Facilitator Superfamily	similar to H0702G05.6 protein	transporter activity,transport,membrane,integral to membrane	None
chromosome_1	24708800	-	G	A	Sb01g021213	0	773	347	116	Q	*	None	None	None	Predicted protein	proteolysis and peptidolysis,cysteine-type peptidase activity	None
chromosome_1	24717536	-	G	A	Sb01g021220	0	3259	2581	861	R	*	None	HELICASE-RELATED	None	similar to Putative DNA helicase homolog	None	None
chromosome_1	24718148	-	G	A	Sb01g021220	0	2647	1969	657	Q	*	None	HELICASE-RELATED	None	similar to Putative DNA helicase homolog	None	None
chromosome_1	24719177	-	G	A	Sb01g021220	0	1618	1327	443	Q	*	None	HELICASE-RELATED	None	similar to Putative DNA helicase homolog	None	None
chromosome_1	24720456	-	G	A	Sb01g021220	0	339	208	70	Q	*	None	HELICASE-RELATED	None	similar to Putative DNA helicase homolog	None	None
chromosome_1	24851838	+	C	T	Sb01g021300	0	1419	483	161	R	*	Serine/threonine protein kinase	SERINE-THREONINE PROTEIN KINASE, PLANT-TYPE	Protein kinase domain|Protein tyrosine kinase	similar to Protein kinase APK1B, chloroplast, putative, expressed	protein kinase activity,protein serine/threonine kinase activity,protein-tyrosine kinase activity,ATP binding,protein amino acid phosphorylation	None
chromosome_1	25012381	-	C	T	Sb01g021392	1	2597	1712	571	W	*	None	None	None	Predicted protein	None	None
chromosome_1	25014943	-	C	A	Sb01g021392	0	35	35	12	E	*	None	None	None	Predicted protein	None	None
chromosome_1	25104403	-	G	A	Sb01g021420	0	3702	873	291	R	*	None	None	None	similar to Cellulose synthase-like F7	None	None
chromosome_1	25176991	+	G	T	Sb01g021460	0	583	583	195	E	*	Speckle-type POZ protein SPOP and related proteins with TRAF, MATH and BTB/POZ domains	KELCH-RELATED PROTEINS	MATH domain|BTB/POZ domain	weakly similar to Os10g0423800 protein	protein binding	None
chromosome_1	25216229	-	G	A	Sb01g021500	0	10051	699	233	Q	*	Uncharacterized conserved protein, contains double-stranded beta-helix domain	ACIREDUCTONE DIOXYGENASE	ARD/ARD' family|Cupin domain|ARD/ARD' family|Cupin domain	similar to 1,2-dihydroxy-3-keto-5-methylthiopentene dioxygenase 2	regulation of transcription, DNA-dependent	None
chromosome_1	25251773	-	G	A	Sb01g021525	0	1956	1825	609	R	*	None	None	None	Predicted protein	None	None
chromosome_1	25359597	-	G	T	Sb01g021570	2	2638	2369	790	S	*	None	None	None	Predicted protein	None	None
chromosome_1	25361808	-	C	A	Sb01g021570	0	427	331	111	E	*	None	None	None	Predicted protein	None	None
chromosome_1	25361829	-	G	A	Sb01g021570	0	406	310	104	R	*	None	None	None	Predicted protein	None	None
chromosome_1	25387627	-	G	C	Sb01g021600	1	296	296	99	Y	*	None	None	None	Predicted protein	structural molecule activity,microtubule,microtubule-based movement	None
chromosome_1	25387785	-	G	A	Sb01g021600	0	138	138	46	Q	*	None	None	None	Predicted protein	structural molecule activity,microtubule,microtubule-based movement	None
chromosome_1	25477080	-	C	T	Sb01g021617	2	1861	1777	593	W	*	None	None	FAR1 family|SWIM zinc finger	weakly similar to Putative uncharacterized protein	None	None
chromosome_1	25477859	-	G	A	Sb01g021617	0	1082	1082	361	Q	*	None	None	FAR1 family|SWIM zinc finger	weakly similar to Putative uncharacterized protein	None	None
chromosome_1	25478363	-	G	A	Sb01g021617	0	578	578	193	Q	*	None	None	FAR1 family|SWIM zinc finger	weakly similar to Putative uncharacterized protein	None	None
chromosome_1	25496990	+	G	A	Sb01g021620	2	665	665	222	W	*	None	None	None	weakly similar to Putative transposon protein	None	None
chromosome_1	25526808	+	C	T	Sb01g021630	0	385	385	129	Q	*	None	None	None	Predicted protein	None	None
chromosome_1	25527709	+	G	A	Sb01g021630	2	1286	983	328	W	*	None	None	None	Predicted protein	None	None
chromosome_1	25527852	+	C	T	Sb01g021630	0	1429	1126	376	Q	*	None	None	None	Predicted protein	None	None
chromosome_1	25591007	-	G	A	Sb01g021650	0	2172	708	236	Q	*	Uncharacterized conserved protein	None	None	similar to Expressed protein	None	None
chromosome_1	25607483	+	C	A	Sb01g021660	1	1599	1479	493	Y	*	None	MYOSIN I, HIGH MOLECULAR WEIGHT FORM	IQ calmodulin-binding motif|IQ calmodulin-binding motif	weakly similar to IQ calmodulin-binding motif family protein, expressed	None	None
chromosome_1	26034536	-	G	A	Sb01g021815	0	425	285	95	Q	*	None	REVERSE TRANSCRIPTASES	None	weakly similar to Putative reverse transcriptase	None	None
chromosome_1	26067491	-	G	C	Sb01g021822	1	581	581	194	Y	*	None	None	None	Predicted protein	None	None
chromosome_1	26067847	-	G	A	Sb01g021822	0	225	225	75	Q	*	None	None	None	Predicted protein	None	None
chromosome_1	26068033	-	G	A	Sb01g021822	0	39	39	13	Q	*	None	None	None	Predicted protein	None	None
chromosome_1	26254344	+	C	T	Sb01g021865	0	700	547	183	Q	*	None	None	None	similar to Transposon protein, putative, CACTA, En/Spm sub-class, expressed	None	None
chromosome_1	26455125	+	G	T	Sb01g021900	0	1003	907	303	E	*	None	None	None	weakly similar to Putative uncharacterized protein	None	None
chromosome_1	26455170	+	G	T	Sb01g021900	0	1048	952	318	E	*	None	None	None	weakly similar to Putative uncharacterized protein	None	None
chromosome_1	26464895	+	C	T	Sb01g021905	0	247	247	83	Q	*	None	None	None	Predicted protein	None	None
chromosome_1	26657264	+	C	T	Sb01g021943	0	106	106	36	R	*	None	None	None	Predicted protein	None	None
chromosome_1	26661823	+	G	A	Sb01g021946	2	62	62	21	W	*	None	None	None	Predicted protein	None	None
chromosome_1	26748203	+	C	T	Sb01g021980	0	3084	1540	514	R	*	Pyridine nucleotide-disulphide oxidoreductase	DISULFIDE OXIDOREDUCTASE	Pyridine nucleotide-disulphide oxidoreductase|Pyridine nucleotide-disulphide oxidoreductase|Pyridine nucleotide-disulphide oxidoreductase, dimerisation domain	similar to Putative uncharacterized protein	cytoplasm,electron transport,disulfide oxidoreductase activity,oxidoreductase activity,FAD binding	None
chromosome_1	26968636	-	G	A	Sb01g022000	0	1288	1288	430	Q	*	None	None	MuDR family transposase	similar to Transposon protein, putative, Mutator sub-class	aspartic-type endopeptidase activity,proteolysis and peptidolysis	None
chromosome_1	26969320	-	G	A	Sb01g022000	0	604	604	202	Q	*	None	None	MuDR family transposase	similar to Transposon protein, putative, Mutator sub-class	aspartic-type endopeptidase activity,proteolysis and peptidolysis	None
chromosome_1	26979223	-	G	T	Sb01g022020	1	1582	822	274	Y	*	Amino acid transporters	AMINO ACID TRANSPORTER	Transmembrane amino acid transporter protein	similar to Transmembrane amino acid transporter protein, expressed	amino acid-polyamine transporter activity,amino acid transport,membrane	None
chromosome_1	27021563	+	C	A	Sb01g022050	1	2259	2259	753	Y	*	Leucine-rich repeat protein	SERINE-THREONINE PROTEIN KINASE, PLANT-TYPE	Leucine rich repeat N-terminal domain|Leucine Rich Repeat|Leucine Rich Repeat|Leucine Rich Repeat|Leucine Rich Repeat|Leucine Rich Repeat|Leucine Rich Repeat|Leucine Rich Repeat|Leucine Rich Repeat|Leucine Rich Repeat|Leucine Rich Repeat|Leucine Rich Repeat|Leucine Rich Repeat|Leucine Rich Repeat|Leucine Rich Repeat|Leucine Rich Repeat|Leucine Rich Repeat|Leucine Rich Repeat|Leucine Rich Repeat|L…	weakly similar to Putative uncharacterized protein	None	Phosphotransferases with an alcohol group as acceptor.;\N;\N;\N;Sphingoglycolipid metabolism;Metabolism of Complex Lipids;METABOLIC,Phosphotransferases with an alcohol group as acceptor.;\N;\N;\N;Benzoate degradation via CoA ligation;Biodegradation of Xenobiotics;METABOLIC,Phosphotransferases with an alcohol group as acceptor.;\N;\N;\N;Starch and sucrose metabolism;Metabolism of Complex Carbohydr…
chromosome_1	27092644	+	T	G	Sb01g022120	2	1329	785	262	L	*	None	None	None	Predicted protein	None	None
chromosome_1	27226173	-	C	A	Sb01g022175	0	1244	805	269	G	*	None	SENTRIN/SUMO-SPECIFIC PROTEASE	None	Predicted protein	proteolysis and peptidolysis,cysteine-type peptidase activity	None
chromosome_1	27227307	-	C	T	Sb01g022175	2	110	110	37	W	*	None	SENTRIN/SUMO-SPECIFIC PROTEASE	None	Predicted protein	proteolysis and peptidolysis,cysteine-type peptidase activity	None
chromosome_1	27391154	+	C	T	Sb01g022265	0	76	76	26	Q	*	None	None	None	Predicted protein	None	None
chromosome_1	27410070	-	G	A	Sb01g022270	0	184	184	62	Q	*	None	None	None	similar to OSIGBa0092G14.5 protein	None	None
chromosome_1	27682568	-	C	T	Sb01g022360	2	86	86	29	W	*	None	None	Zinc finger, C3HC4 type (RING finger)	similar to Os10g0406200 protein	ubiquitin ligase complex,ubiquitin-protein ligase activity,zinc ion binding,protein ubiquitination	None
chromosome_1	27746432	+	C	T	Sb01g022380	0	598	598	200	R	*	None	None	AP2 domain	similar to AP2 domain containing protein	transcription factor activity,nucleus,regulation of transcription, DNA-dependent	None
chromosome_1	27999499	-	C	T	Sb01g022400	2	1621	346	116	W	*	Serine/threonine protein kinase	SERINE-THREONINE PROTEIN KINASE, PLANT-TYPE	Protein kinase domain|Protein tyrosine kinase	similar to Serine/threonine-protein kinase NAK, putative, expressed	protein kinase activity,protein serine/threonine kinase activity,protein-tyrosine kinase activity,ATP binding,protein amino acid phosphorylation	None
chromosome_1	28065792	+	C	T	Sb01g022405	0	328	328	110	R	*	None	None	None	similar to Transposon protein, putative, CACTA, En/Spm sub-class	None	None
chromosome_1	28100863	-	G	A	Sb01g022414	0	2337	1971	657	Q	*	None	None	MuDR family transposase|SWIM zinc finger	similar to Transposase related protein	None	None
chromosome_1	28100902	-	G	A	Sb01g022414	0	2298	1932	644	Q	*	None	None	MuDR family transposase|SWIM zinc finger	similar to Transposase related protein	None	None
chromosome_1	28275630	+	C	T	Sb01g022423	0	717	358	120	Q	*	None	None	None	weakly similar to OSIGBa0103I21.5 protein	None	None
chromosome_1	29224218	+	G	T	Sb01g022710	0	499	475	159	E	*	None	None	None	similar to Putative uncharacterized protein	None	None
chromosome_1	29224244	+	C	A	Sb01g022710	1	525	501	167	Y	*	None	None	None	similar to Putative uncharacterized protein	None	None
chromosome_1	29460848	-	T	A	Sb01g022745	0	229	229	77	R	*	None	None	None	weakly similar to Putative uncharacterized protein	None	None
chromosome_1	29493131	-	G	A	Sb01g022750	0	1104	586	196	Q	*	None	REVERSE TRANSCRIPTASES	None	similar to Putative uncharacterized protein	None	None
chromosome_1	29493957	-	C	T	Sb01g022750	2	278	222	74	W	*	None	REVERSE TRANSCRIPTASES	None	similar to Putative uncharacterized protein	None	None
chromosome_1	29937129	+	C	T	Sb01g023025	0	163	163	55	Q	*	None	None	None	similar to Putative polyprotein	None	None
chromosome_1	29953464	-	T	A	Sb01g023040	0	2678	2527	843	K	*	None	None	SWIM zinc finger|Zinc knuckle	weakly similar to OSJNBa0091C07.2 protein	nucleic acid binding	None
chromosome_1	30408570	+	C	T	Sb01g023090	0	91	91	31	Q	*	None	None	None	Predicted protein	None	None
chromosome_1	30410046	+	C	T	Sb01g023090	0	1567	1417	473	Q	*	None	None	None	Predicted protein	None	None
chromosome_1	30410099	+	C	A	Sb01g023090	1	1620	1470	490	C	*	None	None	None	Predicted protein	None	None
chromosome_1	30411438	+	C	T	Sb01g023090	0	2959	2731	911	Q	*	None	None	None	Predicted protein	None	None
chromosome_1	30767083	-	G	A	Sb01g023220	0	551	81	27	R	*	None	GLUTAREDOXIN	None	similar to Glutaredoxin-C6	electron transporter activity,electron transport,cell redox homeostasis	None
chromosome_1	30794014	+	G	A	Sb01g023225	2	41	41	14	W	*	None	None	None	similar to Putative transposase	None	None
chromosome_1	30794585	+	G	T	Sb01g023230	0	381	277	93	E	*	None	None	None	similar to Putative transposase	None	None
chromosome_1	30794868	+	G	A	Sb01g023230	2	664	560	187	W	*	None	None	None	similar to Putative transposase	None	None
chromosome_1	30805374	+	G	A	Sb01g023242	2	131	131	44	W	*	None	None	None	similar to Putative transposase	None	None
chromosome_1	31464264	+	C	T	Sb01g023381	0	355	355	119	Q	*	None	None	Protein of unknown function, DUF1544|Protein of unknown function (DUF 659)	Predicted protein	None	None
chromosome_1	31464435	+	C	T	Sb01g023381	0	526	526	176	R	*	None	None	Protein of unknown function, DUF1544|Protein of unknown function (DUF 659)	Predicted protein	None	None
chromosome_1	32221270	+	G	A	Sb01g023851	2	500	500	167	W	*	None	REVERSE TRANSCRIPTASES	Endonuclease/Exonuclease/phosphatase family	Predicted protein	None	None
chromosome_1	32221647	+	C	T	Sb01g023851	0	877	877	293	R	*	None	REVERSE TRANSCRIPTASES	Endonuclease/Exonuclease/phosphatase family	Predicted protein	None	None
chromosome_1	38645317	-	G	T	Sb01g024380	1	1745	639	213	Y	*	None	None	None	Predicted protein	None	None
chromosome_1	40082460	+	C	T	Sb01g024840	0	394	319	107	Q	*	None	None	Whi5 like	Predicted protein	None	None
chromosome_1	40082475	+	C	T	Sb01g024840	0	409	334	112	Q	*	None	None	Whi5 like	Predicted protein	None	None
chromosome_1	40221001	+	G	A	Sb01g024853	2	35	35	12	W	*	None	GAG/POL/ENV POLYPROTEIN	None	similar to Os07g0410500 protein	None	None
chromosome_1	40221027	+	G	T	Sb01g024853	0	61	61	21	E	*	None	GAG/POL/ENV POLYPROTEIN	None	similar to Os07g0410500 protein	None	None
chromosome_1	40847865	-	C	T	Sb01g025191	1	143	143	48	W	*	None	None	None	weakly similar to Putative transposon protein	None	None
chromosome_1	40847866	-	C	T	Sb01g025191	2	142	142	48	W	*	None	None	None	weakly similar to Putative transposon protein	None	None
chromosome_1	40847933	-	G	A	Sb01g025191	0	75	75	25	Q	*	None	None	None	weakly similar to Putative transposon protein	None	None
chromosome_1	41257592	-	C	T	Sb01g025320	2	1343	1263	421	W	*	None	None	None	Predicted protein	None	None
chromosome_1	41260469	-	G	A	Sb01g025330	0	142	142	48	Q	*	None	None	None	Predicted protein	None	None
chromosome_1	42336289	-	G	A	Sb01g025810	0	1181	340	114	Q	*	None	None	None	Predicted protein	None	Acid--D-amino-acid ligases (peptide synthases).;\N;\N;\N;Tryptophan metabolism;Amino Acid Metabolism;METABOLIC,Acid--D-amino-acid ligases (peptide synthases).;\N;\N;\N;Ubiquinone biosynthesis;Metabolism of Cofactors and Vitamins;METABOLIC
chromosome_1	42405620	+	G	T	Sb01g025830	0	1497	664	222	E	*	None	None	None	Predicted protein	None	None
chromosome_1	42512880	+	T	A	Sb01g025835	2	1412	389	130	L	*	None	None	None	Predicted protein	None	None
chromosome_1	42514253	+	C	T	Sb01g025835	0	2785	1762	588	Q	*	None	None	None	Predicted protein	None	None
chromosome_1	42514349	+	A	T	Sb01g025835	0	2881	1858	620	K	*	None	None	None	Predicted protein	None	None
chromosome_1	42707738	-	G	A	Sb01g025875	0	1051	964	322	Q	*	None	None	None	Predicted protein	dihydropteroate synthase activity,folic acid and derivative biosynthesis	None
chromosome_1	43081742	-	G	A	Sb01g025885	0	2171	1886	629	R	*	None	None	None	Predicted protein	None	None
chromosome_1	43081793	-	G	A	Sb01g025885	0	2120	1835	612	R	*	None	None	None	Predicted protein	None	None
chromosome_1	43091370	-	A	C	Sb01g025890	1	11	11	4	Y	*	None	None	None	Predicted protein	None	None
chromosome_1	43118990	+	C	G	Sb01g025925	2	662	662	221	S	*	None	None	Transposase family tnp2	similar to Putative uncharacterized protein	None	None
chromosome_1	43502462	+	C	G	Sb01g026170	2	805	643	215	S	*	None	None	Protein of unknown function (DUF1210)	similar to Proline-rich protein precursor	None	None
chromosome_1	43689628	-	G	A	Sb01g026200	0	986	986	329	Q	*	None	None	None	Predicted protein	None	None
chromosome_1	43689886	-	C	A	Sb01g026200	0	728	728	243	E	*	None	None	None	Predicted protein	None	None
chromosome_1	43689889	-	G	A	Sb01g026200	0	725	725	242	Q	*	None	None	None	Predicted protein	None	None
chromosome_1	43689896	-	A	C	Sb01g026200	1	718	718	240	Y	*	None	None	None	Predicted protein	None	None
chromosome_1	43690302	-	C	T	Sb01g026200	2	312	312	104	W	*	None	None	None	Predicted protein	None	None
chromosome_1	44107237	-	G	A	Sb01g026310	0	697	601	201	Q	*	None	None	None	Predicted protein	None	None
chromosome_1	44145826	-	G	A	Sb01g026315	0	581	581	194	Q	*	None	None	None	weakly similar to Transposon protein, putative, CACTA, En/Spm sub-class	None	None
chromosome_1	44261876	-	G	A	Sb01g026330	0	5825	429	143	R	*	None	RING FINGER CONTAINING PROTEIN	Zinc finger, C3HC4 type (RING finger)	similar to Zinc finger, C3HC4 type (RING finger), putative	ubiquitin ligase complex,ubiquitin-protein ligase activity,zinc ion binding,protein ubiquitination	None
chromosome_1	44288411	+	A	T	Sb01g026350	0	1665	443	148	K	*	26S proteasome regulatory complex, subunit RPN10/PSMD4	26S PROTEASOME NON-ATPASE REGULATORY SUBUNIT 4	None	weakly similar to OsS5a	None	None
chromosome_1	44323735	+	C	A	Sb01g026390	2	62	62	21	S	*	Glycosyl hydrolase, family 38 - alpha-mannosidase	ALPHA-MANNOSIDASE	Glycosyl hydrolases family 38 N-terminal domain|Glycosyl hydrolases family 38 C-terminal domain	similar to Glycosyl hydrolase family 38 protein, putative, expressed	alpha-mannosidase activity,carbohydrate metabolism	Alpha-mannosidase.;Hydrolysis of terminal, non-reducing alpha-D-mannose residues in alpha-D-mannosides.;\N;Mannosidosis; MIM:248500.;N-Glycan degradation;Metabolism of Complex Carbohydrates;METABOLIC
chromosome_1	44560617	-	G	A	Sb01g026430	0	133	133	45	R	*	None	None	None	Predicted protein	None	None
chromosome_1	44601436	+	C	T	Sb01g026455	0	854	577	193	Q	*	None	None	FBD	weakly similar to F-box domain containing protein, expressed	None	None
chromosome_1	44641276	+	C	T	Sb01g026472	0	472	472	158	R	*	None	None	None	Predicted protein	None	None
chromosome_1	44671602	-	G	C	Sb01g026485	1	444	444	148	Y	*	None	None	None	weakly similar to Putative transposon protein	None	None
chromosome_1	44991527	-	C	T	Sb01g026546	1	4203	452	151	W	*	None	None	Integral membrane protein DUF6	similar to Integral membrane protein DUF6 containing protein, expressed	None	None
chromosome_1	44992048	-	G	T	Sb01g026546	1	3682	177	59	Y	*	None	None	Integral membrane protein DUF6	similar to Integral membrane protein DUF6 containing protein, expressed	None	None
chromosome_1	45083632	+	G	T	Sb01g026560	0	2499	2179	727	E	*	None	None	None	Predicted protein	None	None
chromosome_1	45084434	+	G	A	Sb01g026560	2	3301	2741	914	W	*	None	None	None	Predicted protein	None	None
chromosome_1	45199084	-	G	A	Sb01g026603	0	130	130	44	Q	*	None	None	None	weakly similar to Putative transposase protein	None	None
chromosome_1	45246868	-	G	A	Sb01g026620	0	272	272	91	Q	*	None	None	None	Predicted protein	None	None
chromosome_1	45247425	-	C	T	Sb01g026625	2	14659	204	68	W	*	None	None	None	weakly similar to Os04g0120000 protein	None	None
chromosome_1	45482355	+	G	T	Sb01g026675	0	334	334	112	G	*	None	None	None	similar to Os02g0543900 protein	None	None
chromosome_1	45792207	-	G	T	Sb01g026770	2	706	706	236	S	*	None	None	Protein of unknown function (DUF 659)	weakly similar to Os10g0121300 protein	proteolysis and peptidolysis,metabolism,metallopeptidase activity,zinc ion binding,transferase activity	None
chromosome_1	45810141	+	C	T	Sb01g026780	0	1016	778	260	Q	*	None	None	None	weakly similar to Putative uncharacterized protein	None	None
chromosome_1	45811276	+	C	G	Sb01g026780	1	2151	1026	342	Y	*	None	None	None	weakly similar to Putative uncharacterized protein	None	None
chromosome_1	46050982	-	A	C	Sb01g026910	1	1482	1482	494	Y	*	None	None	FAR1 family|SWIM zinc finger	similar to Putative Mutator-like transposase	None	None
chromosome_1	46069121	-	G	T	Sb01g026925	1	225	225	75	Y	*	None	None	Gibberellin regulated protein	similar to Putative gibberellin-regulated protein	None	None
chromosome_1	46110452	-	G	A	Sb01g026950	0	136	136	46	Q	*	None	None	None	weakly similar to Expressed protein	None	None
chromosome_1	46127266	-	G	C	Sb01g026970	2	1520	1520	507	S	*	DNA helicase PIF1/RRM3	HELICASE-RELATED	Eukaryotic protein of unknown function (DUF889)	similar to DNA helicase homolog, putative	None	None
chromosome_1	46128503	-	G	A	Sb01g026970	0	283	283	95	Q	*	DNA helicase PIF1/RRM3	HELICASE-RELATED	Eukaryotic protein of unknown function (DUF889)	similar to DNA helicase homolog, putative	None	None
chromosome_1	46248280	+	C	T	Sb01g026990	0	34	34	12	Q	*	None	None	None	Predicted protein	None	None
chromosome_1	46298326	-	G	C	Sb01g027010	2	566	366	122	S	*	Aldo/keto reductase family proteins	ALDO/KETO REDUCTASE	Aldo/keto reductase family	similar to NADH-dependent oxidoreductase 2, putative, expressed	oxidoreductase activity	None
chromosome_1	46344065	-	C	T	Sb01g027020	1	8556	1570	524	W	*	Predicted ATP-dependent RNA helicase FAL1, involved in rRNA maturation, DEAD-box superfamily	DNA HELICASE RECQ FAMILY MEMBER	DEAD/DEAH box helicase|Helicase conserved C-terminal domain	similar to ATP-dependent DNA helicase, RecQ family protein, expressed	nucleic acid binding,helicase activity,ATP binding,DNA metabolism,ATP-dependent helicase activity	In phosphorous-containing anhydrides.;\N;\N;\N;Starch and sucrose metabolism;Metabolism of Complex Carbohydrates;METABOLIC,In phosphorous-containing anhydrides.;\N;\N;\N;Folate biosynthesis;Metabolism of Cofactors and Vitamins;METABOLIC
chromosome_1	46344179	-	C	A	Sb01g027020	0	8442	1530	510	G	*	Predicted ATP-dependent RNA helicase FAL1, involved in rRNA maturation, DEAD-box superfamily	DNA HELICASE RECQ FAMILY MEMBER	DEAD/DEAH box helicase|Helicase conserved C-terminal domain	similar to ATP-dependent DNA helicase, RecQ family protein, expressed	nucleic acid binding,helicase activity,ATP binding,DNA metabolism,ATP-dependent helicase activity	In phosphorous-containing anhydrides.;\N;\N;\N;Starch and sucrose metabolism;Metabolism of Complex Carbohydrates;METABOLIC,In phosphorous-containing anhydrides.;\N;\N;\N;Folate biosynthesis;Metabolism of Cofactors and Vitamins;METABOLIC
chromosome_1	46538364	+	C	T	Sb01g027164	0	1248	382	128	Q	*	None	None	SWIM zinc finger	similar to Os06g0484800 protein	None	None
chromosome_1	47061480	+	C	T	Sb01g027360	0	637	637	213	Q	*	Serine/threonine protein kinase	SERINE-THREONINE PROTEIN KINASE, PLANT-TYPE	Domain of unknown function DUF26|Domain of unknown function DUF26|Protein kinase domain|Protein tyrosine kinase	similar to Protein kinase domain containing protein, expressed	protein kinase activity,protein serine/threonine kinase activity,protein-tyrosine kinase activity,ATP binding,protein amino acid phosphorylation	None
chromosome_1	47404975	-	G	A	Sb01g027450	0	53	53	18	Q	*	None	None	None	Predicted protein	None	None
chromosome_1	47579470	+	C	G	Sb01g027500	2	668	668	223	S	*	None	None	None	weakly similar to Putative transposon protein	None	None
chromosome_1	47587941	+	C	T	Sb01g027510	0	28	28	10	R	*	None	None	None	Predicted protein	None	None
chromosome_1	47588010	+	C	T	Sb01g027510	0	97	97	33	Q	*	None	None	None	Predicted protein	None	None
chromosome_1	47591773	+	G	T	Sb01g027510	0	3860	3352	1118	G	*	None	None	None	Predicted protein	None	None
chromosome_1	47666498	+	A	T	Sb01g027530	0	1668	420	140	K	*	Serine/threonine protein kinase	SERINE-THREONINE PROTEIN KINASE, PLANT-TYPE	Protein kinase domain|Protein tyrosine kinase	similar to Nodulation receptor kinase-like protein	protein kinase activity,protein serine/threonine kinase activity,protein-tyrosine kinase activity,ATP binding,protein amino acid phosphorylation	None
chromosome_1	47854106	-	G	A	Sb01g027560	0	2029	487	163	Q	*	None	None	None	Predicted protein	None	None
chromosome_1	47994495	-	G	A	Sb01g027630	0	8525	3332	1111	Q	*	None	None	None	similar to Putative uncharacterized protein	None	None
chromosome_1	48012709	-	C	T	Sb01g027640	2	55	44	15	W	*	None	STEROIDOGENIC ACUTE REGULATORY (STAR)	PH domain|START domain|Protein of unknown function (DUF1336)	similar to Pleckstriny domain-containing protein, putative, expressed	None	None
chromosome_1	48243751	-	G	A	Sb01g027730	0	1279	420	140	Q	*	H+/oligopeptide symporter	OLIGOPEPTIDE TRANSPORTER-RELATED	POT family	similar to POT family protein, expressed	transporter activity,oligopeptide transport,membrane	None
chromosome_1	48269406	-	G	A	Sb01g027750	0	1050	736	246	Q	*	None	None	None	Predicted protein	None	None
chromosome_1	48270319	-	C	A	Sb01g027750	0	137	137	46	G	*	None	None	None	Predicted protein	None	None
chromosome_1	48277943	+	A	T	Sb01g027753	0	730	535	179	K	*	None	None	BED zinc finger	weakly similar to Os01g0290300 protein	DNA binding	None
chromosome_1	48382407	+	C	T	Sb01g027780	0	2647	2149	717	Q	*	None	None	MuDR family transposase|SWIM zinc finger|Protein of unknown function (DUF1723)	weakly similar to H0124B04.19 protein	None	None
chromosome_1	48515329	+	C	T	Sb01g027855	0	100	100	34	Q	*	None	NON-LTR RETROELEMENT REVERSE TRANSCRIPTASE RELATED	None	weakly similar to Putative uncharacterized protein	None	None
chromosome_1	48532035	-	G	A	Sb01g027880	0	1804	1431	477	Q	*	None	None	Cellulose synthase	similar to Putative uncharacterized protein	membrane,cellulose synthase (UDP-forming) activity,cellulose biosynthesis	None
chromosome_1	48781957	-	G	A	Sb01g028010	0	2241	2077	693	Q	*	E3 ubiquitin ligase involved in syntaxin degradation	MYOSIN HEAVY CHAIN-RELATED	None	Predicted protein	None	None
chromosome_1	48823676	-	G	A	Sb01g028040	0	1723	1723	575	R	*	DNA helicase PIF1/RRM3	HELICASE-RELATED	Eukaryotic protein of unknown function (DUF889)	similar to DNA helicase homolog, putative	None	None
chromosome_1	48824734	-	C	T	Sb01g028040	2	665	665	222	W	*	DNA helicase PIF1/RRM3	HELICASE-RELATED	Eukaryotic protein of unknown function (DUF889)	similar to DNA helicase homolog, putative	None	None
chromosome_1	48825236	-	G	A	Sb01g028040	0	163	163	55	R	*	DNA helicase PIF1/RRM3	HELICASE-RELATED	Eukaryotic protein of unknown function (DUF889)	similar to DNA helicase homolog, putative	None	None
chromosome_1	48827559	-	C	T	Sb01g028045	1	485	485	162	W	*	None	None	None	weakly similar to Putative helicase	None	None
chromosome_1	48913751	-	G	A	Sb01g028070	0	795	699	233	Q	*	None	None	PB1 domain	weakly similar to Putative uncharacterized protein	None	None
chromosome_1	48913849	-	G	C	Sb01g028070	2	697	601	201	S	*	None	None	PB1 domain	weakly similar to Putative uncharacterized protein	None	None
chromosome_1	49114653	+	G	T	Sb01g028160	0	3318	1821	607	E	*	None	HOMEOBOX PROTEIN	Homeobox domain|START domain	similar to OCL4 protein	DNA binding,transcription factor activity,nucleus,regulation of transcription, DNA-dependent	None
chromosome_1	49143089	-	G	A	Sb01g028165	0	38	38	13	Q	*	None	None	None	weakly similar to Putative uncharacterized protein OSJNBa0095C07.29	None	None
chromosome_1	49369164	-	T	A	Sb01g028270	0	6008	1316	439	K	*	Lecithin:cholesterol acyltransferase (LCAT)/Acyl-ceramide synthase	LECITHIN-CHOLESTEROL ACYLTRANSFERASE-RELATED	None	similar to Putative uncharacterized protein	phosphatidylcholine-sterol O-acyltransferase activity,lipid metabolism	Lysophospholipase.;2-lysophosphatidylcholine + H(2)O = glycerophosphocholine + a fatty acid anion.;\N;\N;Phospholipid degradation;Metabolism of Complex Lipids;METABOLIC
chromosome_1	49369175	-	C	T	Sb01g028270	2	5997	1305	435	W	*	Lecithin:cholesterol acyltransferase (LCAT)/Acyl-ceramide synthase	LECITHIN-CHOLESTEROL ACYLTRANSFERASE-RELATED	None	similar to Putative uncharacterized protein	phosphatidylcholine-sterol O-acyltransferase activity,lipid metabolism	Lysophospholipase.;2-lysophosphatidylcholine + H(2)O = glycerophosphocholine + a fatty acid anion.;\N;\N;Phospholipid degradation;Metabolism of Complex Lipids;METABOLIC
chromosome_1	49482910	-	C	A	Sb01g028370	0	200	127	43	G	*	Possible pfkB family carbohydrate kinase	SUGAR KINASE RELATED	pfkB family carbohydrate kinase	similar to Carbohydrate kinase, putative, expressed	ribokinase activity,D-ribose metabolism	Adenosine kinase.;ATP + adenosine = ADP + AMP.;\N;\N;Purine metabolism;Nucleotide Metabolism;METABOLIC
chromosome_1	49583152	+	C	T	Sb01g028400	0	1569	1225	409	Q	*	None	None	AT hook motif|AT hook motif|Domain of unknown function (DUF296)	similar to AT-hook protein 1, putative, expressed	None	None
chromosome_1	49614610	+	A	T	Sb01g028420	0	6925	2664	888	K	*	None	BROMODOMAIN ADJACENT TO ZINC FINGER DOMAIN 1, BAZ1	PHD-finger	similar to Expressed protein	DNA binding,regulation of transcription, DNA-dependent	None
chromosome_1	49806299	+	C	A	Sb01g028560	2	4252	749	250	S	*	Vacuolar sorting protein VPS1, dynamin, and related proteins	DYNAMIN	Dynamin family|Dynamin central region|Dynamin GTPase effector domain	similar to Dynamin-related protein 1C, putative, expressed	GTPase activity,GTP binding	None
chromosome_1	49915260	+	G	T	Sb01g028620	0	1136	300	100	E	*	None	None	None	similar to Peroxidase family protein, expressed	peroxidase activity,response to oxidative stress	None
chromosome_1	50111144	+	C	A	Sb01g028710	1	279	279	93	Y	*	mRNA deadenylase subunit	CCR4-ASSOCIATED FACTOR	CAF1 family ribonuclease	weakly similar to Putative uncharacterized protein	nucleus,negative regulation of transcription,transcriptional repressor activity	None
chromosome_1	50114250	-	C	T	Sb01g028720	2	1858	412	138	W	*	Metacaspase involved in regulation of apoptosis	None	LSD1 zinc finger|Caspase domain	similar to Os10g0565100 protein	proteolysis and peptidolysis,caspase activity	None
chromosome_1	50175036	-	G	A	Sb01g028750	0	1951	348	116	R	*	Ca2+/calmodulin-dependent protein phosphatase (calcineurin subunit B), EF-Hand superfamily protein	CALCINEURIN B	EF hand|EF hand|EF hand	similar to Calcineurin B-like protein 1	calcium ion binding	None
chromosome_1	50298414	-	G	A	Sb01g028870	0	908	459	153	R	*	None	None	Myb-like DNA-binding domain	similar to MCB1 protein, putative, expressed	DNA binding,nucleus	None
chromosome_1	50385019	+	T	A	Sb01g028900	2	2765	1836	612	L	*	Putative serine/threonine protein kinase	SERINE/THREONINE PROTEIN KINASE	Protein kinase domain	similar to Protein kinase PVPK-1, putative, expressed	protein kinase activity,protein serine/threonine kinase activity,protein-tyrosine kinase activity,ATP binding,protein amino acid phosphorylation	Protein kinase.;ATP + a protein = ADP + a phosphoprotein.;\N;\N;\N;\N;\N
chromosome_1	50471688	+	C	A	Sb01g028940	1	12277	393	131	Y	*	Palmitoyl protein thioesterase	PALMITOYL-PROTEIN THIOESTERASE/DOLICHYLDIPHOSPHATASE 1	Palmitoyl protein thioesterase	similar to Palmitoyl protein thioesterase containing protein, expressed	lysosome,protein modification,palmitoyl-(protein) hydrolase activity	Palmitoyl-protein hydrolase.;Palmitoyl-protein + H(2)O = palmitate + protein.;\N;\N;\N;\N;\N
chromosome_1	50616499	-	T	A	Sb01g029000	0	840	504	168	R	*	Transcription factor HEX, contains HOX and HALZ domains	HOMEOBOX PROTEIN	HD-ZIP protein N terminus|Homeobox domain|Homeobox associated leucine zipper	similar to DNA-binding protein	DNA binding,transcription factor activity,nucleus,transcription,regulation of transcription, DNA-dependent,transcriptional activator activity	None
chromosome_1	50883163	+	C	T	Sb01g029120	0	2984	2349	783	R	*	None	None	Agenet domain	weakly similar to Agenet domain containing protein, expressed	RNA binding,ATP binding,ATP synthesis coupled proton transport,proton-transporting two-sector ATPase complex,hydrogen-transporting ATP synthase activity, rotational mechanism,hydrogen-transporting ATPase activity, rotational mechanism	Exo-alpha-sialidase.;Hydrolysis of alpha-(2->3)-, alpha-(2->6)-, alpha-(2->8)-glycosidic linkages of terminal sialic residues in oligosaccharides, glycoproteins, glycolipids, colominic acid and synthetic substrates.;\N;Sialidosis; MIM:256550.;N-Glycan degradation;Metabolism of Complex Carbohydrates;METABOLIC,Exo-alpha-sialidase.;Hydrolysis of alpha-(2->3)-, alpha-(2->6)-, alpha-(2->8)-glycosidic …
chromosome_1	51085082	-	G	A	Sb01g029240	0	874	557	186	Q	*	None	None	None	similar to A protein	DNA binding,nucleus	None
chromosome_1	51085352	-	G	C	Sb01g029240	2	604	337	113	S	*	None	None	None	similar to A protein	DNA binding,nucleus	None
chromosome_1	51085458	-	G	A	Sb01g029240	0	498	231	77	Q	*	None	None	None	similar to A protein	DNA binding,nucleus	None
chromosome_1	51118546	-	C	T	Sb01g029265	1	3732	1246	416	W	*	None	None	None	similar to Putative transposon protein	None	None
chromosome_1	51172748	-	G	A	Sb01g029290	0	936	642	214	Q	*	None	TRANSCRIPTIONAL ADAPTOR 2 (ADA2)-RELATED	Myb-like DNA-binding domain	Predicted protein	DNA binding,nucleus	None
chromosome_1	51199030	-	G	T	Sb01g029315	1	4657	1680	560	Y	*	None	REVERSE TRANSCRIPTASES	None	Predicted protein	None	None
chromosome_1	51199077	-	G	A	Sb01g029315	0	4610	1633	545	Q	*	None	REVERSE TRANSCRIPTASES	None	Predicted protein	None	None
chromosome_1	51203379	-	C	T	Sb01g029315	2	308	308	103	W	*	None	REVERSE TRANSCRIPTASES	None	Predicted protein	None	None
chromosome_1	51281316	-	C	T	Sb01g029360	2	1445	253	85	W	*	Nuclear distribution protein NUDC	NUCLEAR MOVEMENT PROTEIN NUDC	CS domain	similar to Nuclear movement protein-like	None	None
chromosome_1	51291215	-	C	A	Sb01g029366	0	918	828	276	G	*	None	None	Zinc knuckle	similar to P0041A24.2 protein	nucleic acid binding	None
chromosome_1	51291518	-	G	A	Sb01g029366	0	615	525	175	Q	*	None	None	Zinc knuckle	similar to P0041A24.2 protein	nucleic acid binding	None
chromosome_1	51419418	-	G	A	Sb01g029430	0	1650	909	303	Q	*	Flavin-containing monooxygenase	DIMETHYLANILINE MONOOXYGENASE	None	similar to Putative uncharacterized protein	monooxygenase activity,electron transport,disulfide oxidoreductase activity,oxidoreductase activity	Dimethylaniline monooxygenase (N-oxide forming).;N,N-dimethylaniline + NADPH + O(2) = N,N-dimethylaniline N-oxide + NADP(+) + H(2)O.;FAD.;Trimethylaminuria; MIM:602079,;\N;\N;\N
chromosome_1	51419445	-	C	A	Sb01g029430	0	1623	882	294	G	*	Flavin-containing monooxygenase	DIMETHYLANILINE MONOOXYGENASE	None	similar to Putative uncharacterized protein	monooxygenase activity,electron transport,disulfide oxidoreductase activity,oxidoreductase activity	Dimethylaniline monooxygenase (N-oxide forming).;N,N-dimethylaniline + NADPH + O(2) = N,N-dimethylaniline N-oxide + NADP(+) + H(2)O.;FAD.;Trimethylaminuria; MIM:602079,;\N;\N;\N
chromosome_1	51437628	+	C	T	Sb01g029440	0	79	79	27	Q	*	None	None	None	weakly similar to Transposon protein, putative, CACTA, En/Spm sub-class	None	None
chromosome_1	51437712	+	C	T	Sb01g029440	0	163	163	55	R	*	None	None	None	weakly similar to Transposon protein, putative, CACTA, En/Spm sub-class	None	None
chromosome_1	51453299	+	G	T	Sb01g029460	0	935	736	246	G	*	None	DIMETHYLANILINE MONOOXYGENASE	None	similar to Putative uncharacterized protein	monooxygenase activity,electron transport,disulfide oxidoreductase activity,oxidoreductase activity	Dimethylaniline monooxygenase (N-oxide forming).;N,N-dimethylaniline + NADPH + O(2) = N,N-dimethylaniline N-oxide + NADP(+) + H(2)O.;FAD.;Trimethylaminuria; MIM:602079,;\N;\N;\N
chromosome_1	51553569	+	C	T	Sb01g029510	0	833	546	182	R	*	Flavin-containing monooxygenase	DIMETHYLANILINE MONOOXYGENASE	None	similar to Flavin-containing monooxygenase family protein, putative, expressed	monooxygenase activity,transporter activity,electron transport,transport,disulfide oxidoreductase activity,oxidoreductase activity	Dimethylaniline monooxygenase (N-oxide forming).;N,N-dimethylaniline + NADPH + O(2) = N,N-dimethylaniline N-oxide + NADP(+) + H(2)O.;FAD.;Trimethylaminuria; MIM:602079,;\N;\N;\N
chromosome_1	51769269	-	G	T	Sb01g029680	2	2576	1971	657	S	*	None	None	None	Predicted protein	None	None
chromosome_1	51784964	+	G	T	Sb01g029710	0	1574	625	209	G	*	None	NOTUM-RELATED	Pectinacetylesterase	similar to Os10g0550500 protein	None	None
chromosome_1	51815846	-	G	A	Sb01g029735	0	2145	1980	660	R	*	None	REVERSE TRANSCRIPTASES	Reverse transcriptase (RNA-dependent DNA polymerase)	weakly similar to Os07g0115700 protein	nucleic acid binding,RNA binding,RNA-directed DNA polymerase activity,ATP binding,RNA-dependent DNA replication,ATP-dependent helicase activity	None
chromosome_1	51815891	-	G	A	Sb01g029735	0	2100	1935	645	R	*	None	REVERSE TRANSCRIPTASES	Reverse transcriptase (RNA-dependent DNA polymerase)	weakly similar to Os07g0115700 protein	nucleic acid binding,RNA binding,RNA-directed DNA polymerase activity,ATP binding,RNA-dependent DNA replication,ATP-dependent helicase activity	None
chromosome_1	51815954	-	G	A	Sb01g029735	0	2037	1872	624	R	*	None	REVERSE TRANSCRIPTASES	Reverse transcriptase (RNA-dependent DNA polymerase)	weakly similar to Os07g0115700 protein	nucleic acid binding,RNA binding,RNA-directed DNA polymerase activity,ATP binding,RNA-dependent DNA replication,ATP-dependent helicase activity	None
chromosome_1	51907034	-	C	T	Sb01g029820	2	959	1329	443	W	*	None	None	Rare lipoprotein A (RlpA)-like double-psi beta-barrel|Pollen allergen	similar to Expansin-B1 precursor	transporter activity,extracellular region,transport,sexual reproduction	None
chromosome_1	51907573	-	G	A	Sb01g029820	0	420	540	180	Q	*	None	None	Rare lipoprotein A (RlpA)-like double-psi beta-barrel|Pollen allergen	similar to Expansin-B1 precursor	transporter activity,extracellular region,transport,sexual reproduction	None
chromosome_1	51929945	-	G	A	Sb01g029840	0	422	264	88	Q	*	None	None	Rare lipoprotein A (RlpA)-like double-psi beta-barrel|Pollen allergen	similar to Expansin-B1 precursor	transporter activity,extracellular region,transport,sexual reproduction	None
chromosome_1	51943806	+	C	A	Sb01g029855	2	467	371	124	S	*	None	None	None	Predicted protein	None	None
chromosome_1	51959165	+	C	T	Sb01g029855	0	15826	2374	792	R	*	None	None	None	Predicted protein	None	None
chromosome_1	52006981	-	G	T	Sb01g029880	2	1073	2037	679	S	*	None	None	Rare lipoprotein A (RlpA)-like double-psi beta-barrel|Pollen allergen	similar to Expansin-B1 precursor	cysteine-type endopeptidase activity,extracellular region,proteolysis and peptidolysis,sexual reproduction	None
chromosome_1	52017480	+	C	A	Sb01g029890	1	443	204	68	Y	*	None	None	None	similar to Transposon protein, putative, CACTA, En/Spm sub-class	None	None
chromosome_1	52030139	+	C	T	Sb01g029910	0	1438	1438	480	Q	*	None	PENTATRICOPEPTIDE REPEAT-CONTAINING PROTEIN	PPR repeat|PPR repeat|PPR repeat|PPR repeat	similar to Putative uncharacterized protein	None	None
chromosome_1	52236109	+	G	T	Sb01g030020	0	1966	1966	656	E	*	None	None	None	similar to Putative uncharacterized protein	None	None
chromosome_1	52543937	+	C	T	Sb01g030233	0	133	133	45	Q	*	None	REVERSE TRANSCRIPTASES	None	similar to Os07g0115700 protein	None	None
chromosome_1	52593424	-	G	T	Sb01g030290	1	595	441	147	Y	*	Serine/threonine protein kinase	SERINE-THREONINE PROTEIN KINASE, PLANT-TYPE	Tetratricopeptide repeat|Tetratricopeptide repeat	similar to Protein kinase-like protein	protein kinase activity,protein serine/threonine kinase activity,protein-tyrosine kinase activity,calcium ion binding,ATP binding,protein amino acid phosphorylation	Phosphotransferases with an alcohol group as acceptor.;\N;\N;\N;Sphingoglycolipid metabolism;Metabolism of Complex Lipids;METABOLIC,Phosphotransferases with an alcohol group as acceptor.;\N;\N;\N;Benzoate degradation via CoA ligation;Biodegradation of Xenobiotics;METABOLIC,Phosphotransferases with an alcohol group as acceptor.;\N;\N;\N;Starch and sucrose metabolism;Metabolism of Complex Carbohydr…
chromosome_1	52726703	-	C	T	Sb01g030350	2	3324	1187	396	W	*	N-acetylglucosaminyltransferase complex, subunit PIG-Q/GPI1, required for phosphatidylinositol biosynthesis	N-ACETYLGLUCOSAMINYL TRANSFERASE COMPONENT GPI1-RELATED	N-acetylglucosaminyl transferase component (Gpi1)	weakly similar to Chromosome chr8 scaffold_34, whole genome shotgun sequence	GPI anchor biosynthesis,integral to membrane,phosphatidylinositol N-acetylglucosaminyltransferase activity	None
chromosome_1	52817632	-	G	C	Sb01g030380	2	1416	405	135	S	*	Serine/threonine protein phosphatase	PROTEIN PHOSPHATASE 2C	Protein phosphatase 2C	similar to Protein phosphatase 2C containing protein, expressed	catalytic activity,protein serine/threonine phosphatase activity,protein amino acid dephosphorylation,protein serine/threonine phosphatase complex	Serine/threonine specific protein phosphatase.;A phosphoprotein + H(2)O = a protein + phosphate.;\N;\N;\N;\N;\N
chromosome_1	52831336	+	C	T	Sb01g030390	0	2163	694	232	Q	*	None	None	None	Predicted protein	None	None
chromosome_1	52876287	-	G	A	Sb01g030430	0	508	120	40	R	*	Permease of the major facilitator superfamily	SUGAR TRANSPORTER	Sugar (and other) transporter|Major Facilitator Superfamily	similar to Hexose transporter	transporter activity,sugar porter activity,transport,carbohydrate transport,membrane,integral to membrane	L-arabinose isomerase.;L-arabinose = L-ribulose.;\N;\N;Pentose and glucuronate interconversions;Carbohydrate Metabolism;METABOLIC
chromosome_1	52898904	+	C	T	Sb01g030445	0	187	187	63	Q	*	None	None	None	Predicted protein	None	None
chromosome_1	53152953	-	G	A	Sb01g030590	0	417	314	105	R	*	None	None	Rare lipoprotein A (RlpA)-like double-psi beta-barrel|Pollen allergen	similar to Putative expansin-A30 precursor	extracellular region,cell wall organization and biogenesis (sensu Magnoliophyta)	None
chromosome_1	53257527	-	A	T	Sb01g030680	2	673	210	70	L	*	Mitogen-activated protein kinase	CDC2-RELATED KINASE	Protein kinase domain|Protein tyrosine kinase	similar to Mitogen-activated protein kinase 6	protein kinase activity,protein serine/threonine kinase activity,MAP kinase activity,protein-tyrosine kinase activity,ATP binding,protein amino acid phosphorylation	None
chromosome_1	53281378	+	C	A	Sb01g030700	1	2139	1261	421	Y	*	Serine/threonine protein kinase	SERINE-THREONINE PROTEIN KINASE, PLANT-TYPE	Protein tyrosine kinase|Protein kinase domain	similar to Putative uncharacterized protein	protein kinase activity,protein serine/threonine kinase activity,protein-tyrosine kinase activity,ATP binding,protein amino acid phosphorylation	None
chromosome_1	53471073	-	G	A	Sb01g030845	0	1007	404	135	Q	*	None	None	None	similar to Putative transposon protein	None	None
chromosome_1	53531829	-	A	C	Sb01g030920	1	1384	747	249	Y	*	None	None	None	Predicted protein	None	None
chromosome_1	53532007	-	G	T	Sb01g030920	1	1206	658	220	Y	*	None	None	None	Predicted protein	None	None
chromosome_1	53648995	+	C	A	Sb01g031090	2	611	611	204	S	*	None	SUBTILISIN/KEXIN-RELATED SERINE PROTEASE	Subtilisin N-terminal Region|Subtilase family|PA domain	similar to Putative uncharacterized protein	subtilase activity,proteolysis and peptidolysis,peptidase activity,protein self binding,negative regulation of enzyme activity	None
chromosome_1	53663953	+	C	A	Sb01g031100	1	5809	2880	960	Y	*	Phospholipase D1	PHOSPHOLIPASE D	C2 domain|Phospholipase D Active site motif|Phospholipase D Active site motif	similar to Phospholipase D	catalytic activity,phospholipase D activity,calcium ion binding,metabolism,membrane,phosphatidylcholine metabolism	Phospholipase D.;A phosphatidylcholine + H(2)O = choline + a phosphatidate.;\N;\N;Phospholipid degradation;Metabolism of Complex Lipids;METABOLIC,Phospholipase D.;A phosphatidylcholine + H(2)O = choline + a phosphatidate.;\N;\N;Glycerolipid metabolism;Metabolism of Complex Lipids;METABOLIC
chromosome_1	53808155	+	T	A	Sb01g031230	2	1954	798	266	L	*	None	ANKYRIN REPEAT-CONTAINING	Ankyrin repeat|Ankyrin repeat|Ankyrin repeat|Ankyrin repeat|Ankyrin repeat|Zinc finger, C3HC4 type (RING finger)	similar to Pollen ankyrin, putative, expressed	ubiquitin ligase complex,ubiquitin-protein ligase activity,zinc ion binding,protein ubiquitination	None
chromosome_1	54092212	+	G	T	Sb01g031510	0	670	670	224	E	*	None	None	Protein of unknown function, DUF623	similar to Putative uncharacterized protein	None	None
chromosome_1	54101494	+	C	A	Sb01g031520	1	3916	870	290	Y	*	Xanthine dehydrogenase	XANTHINE DEHYDROGENASE	2Fe-2S iron-sulfur cluster binding domain|[2Fe-2S] binding domain|FAD binding domain in molybdopterin dehydrogenase|CO dehydrogenase flavoprotein C-terminal domain|Aldehyde oxidase and xanthine dehydrogenase, a/b hammerhead domain|Aldehyde oxidase and xanthine dehydrogenase, molybdopterin binding domain	similar to Xanthine dehydrogenase, putative	electron transporter activity,iron ion binding,electron transport,oxidoreductase activity	None
chromosome_1	54249946	-	G	T	Sb01g031680	2	726	530	177	S	*	None	None	F-box domain	weakly similar to Putative uncharacterized protein OSJNBa0069I13.10	None	None
chromosome_1	54497191	-	G	A	Sb01g031795	0	511	511	171	Q	*	None	None	Zinc knuckle	similar to P0041A24.2 protein	nucleic acid binding	None
chromosome_1	54501899	-	C	A	Sb01g031800	0	1156	472	158	E	*	None	None	None	weakly similar to Expressed protein	None	None
chromosome_1	54544208	+	C	A	Sb01g031830	2	1520	615	205	S	*	RAB proteins geranylgeranyltransferase component A (RAB escort protein)	RAB GDP-DISSOCIATION INHIBITOR	GDP dissociation inhibitor	similar to Rab GDP dissociation inhibitor alpha, putative, expressed	Rab GDP-dissociation inhibitor activity,protein transport,regulation of GTPase activity	None
chromosome_1	54768129	-	G	C	Sb01g032020	2	1971	1602	534	S	*	None	None	GH3 auxin-responsive promoter	similar to Probable indole-3-acetic acid-amido synthetase GH3.8	None	None
chromosome_1	54802263	-	C	A	Sb01g032025	0	346	346	116	E	*	None	None	None	Predicted protein	None	None
chromosome_1	54887733	+	C	T	Sb01g032060	0	2474	1602	534	R	*	Translation initiation factor 2C (eIF-2C) and related proteins	EUKARYOTIC TRANSLATION INITIATION FACTOR 2C	PAZ domain|Piwi domain	similar to AGO7	transporter activity,transport,membrane	None
chromosome_1	55124700	-	A	T	Sb01g032250	1	2415	1478	493	C	*	Diacylglycerol kinase	DIACYLGLYCEROL KINASE	Phorbol esters/diacylglycerol binding domain (C1 domain)|Phorbol esters/diacylglycerol binding domain (C1 domain)|Diacylglycerol kinase catalytic domain (presumed)|Diacylglycerol kinase accessory domain	similar to Diacylglycerol kinase 1, putative	diacylglycerol kinase activity,protein kinase C activation,intracellular signaling cascade	Diacylglycerol kinase.;ATP + 1,2-diacylglycerol = ADP + 1,2-diacylglycerol 3-phosphate.;\N;\N;Glycerolipid metabolism;Metabolism of Complex Lipids;METABOLIC,Diacylglycerol kinase.;ATP + 1,2-diacylglycerol = ADP + 1,2-diacylglycerol 3-phosphate.;\N;\N;\N;\N;\N
chromosome_1	55264407	+	T	G	Sb01g032360	1	170	120	40	Y	*	Protein involved in the nuclear export of pre-ribosomes	FAMILY NOT NAMED	Nucleolar complex-associated protein|CBF/Mak21 family	similar to Putative uncharacterized protein	magnesium ion binding,metabolism,pyrophosphatase activity	None
chromosome_1	55277376	-	G	A	Sb01g032380	0	4359	1671	557	R	*	RasGAP SH3 binding protein rasputin, contains NTF2 and RRM domains	RNA-BINDING RAS-GAP SH3 BINDING PROTEIN RELATED	Nuclear transport factor 2 (NTF2) domain|RNA recognition motif. (a.k.a. RRM, RBD, or RNP domain)	similar to Putative uncharacterized protein	nucleic acid binding,intracellular,nucleus,protein-nucleus import,protein transporter activity	None
chromosome_1	55301201	-	G	A	Sb01g032400	0	1668	715	239	Q	*	None	None	None	weakly similar to Expressed protein	None	None
chromosome_1	55317475	+	T	A	Sb01g032420	2	4604	825	275	L	*	Vacuolar sorting protein VPS52/suppressor of actin Sac2	SUPPRESSOR OF ACTIN MUTATIONS 2/VACUOLAR PROTEIN SORTING 52	Vps52 / Sac2 family	similar to Putative Vps52 / Sac2 family protein	None	None
chromosome_1	55360195	+	G	T	Sb01g032460	0	2204	878	293	E	*	None	None	Phytochelatin synthetase-like conserved region	similar to COBRA-like 2 protein precursor	None	None
chromosome_1	55360533	+	C	T	Sb01g032470	0	61	61	21	Q	*	None	None	None	Predicted protein	None	None
chromosome_1	55360578	+	C	T	Sb01g032470	0	106	106	36	R	*	None	None	None	Predicted protein	None	None
chromosome_1	55521709	-	G	A	Sb01g032596	0	4417	2196	732	Q	*	None	None	None	Predicted protein	ATP binding,zinc ion binding,ATP synthesis coupled proton transport,proton-transporting two-sector ATPase complex,oxidoreductase activity,hydrogen-transporting ATP synthase activity, rotational mechanism,hydrogen-transporting ATPase activity, rotational mechanism	None
chromosome_1	55522490	-	G	C	Sb01g032596	1	3636	1637	546	Y	*	None	None	None	Predicted protein	ATP binding,zinc ion binding,ATP synthesis coupled proton transport,proton-transporting two-sector ATPase complex,oxidoreductase activity,hydrogen-transporting ATP synthase activity, rotational mechanism,hydrogen-transporting ATPase activity, rotational mechanism	None
chromosome_1	55525573	-	G	A	Sb01g032596	0	553	553	185	Q	*	None	None	None	Predicted protein	ATP binding,zinc ion binding,ATP synthesis coupled proton transport,proton-transporting two-sector ATPase complex,oxidoreductase activity,hydrogen-transporting ATP synthase activity, rotational mechanism,hydrogen-transporting ATPase activity, rotational mechanism	None
chromosome_1	55629697	+	C	A	Sb01g032700	1	5410	1479	493	Y	*	None	UNCHARACTERIZED	None	similar to E3 ubiquitin-protein ligase BRE1-like 2	None	None
chromosome_1	55658557	+	C	A	Sb01g032720	2	1279	1074	358	S	*	Iron/ascorbate family oxidoreductases	FE(II)/ ASCORBATE OXIDASE SUPERFAMILY	2OG-Fe(II) oxygenase superfamily	similar to Os03g0439500 protein	iron ion binding,isopenicillin-N synthase activity,antibiotic biosynthesis	None
chromosome_1	55733844	+	G	T	Sb01g032800	0	82	82	28	E	*	None	None	GRAS family transcription factor	similar to Putative uncharacterized protein	None	None
chromosome_1	55803092	-	A	T	Sb01g032850	2	1167	510	170	L	*	Predicted seven transmembrane receptor - rhodopsin family	ORGANIC SOLUTE TRANSPORTER-RELATED	Domain of unknown function	similar to MAP kinase-activating protein C22orf5, putative, expressed	integral to membrane,photosynthesis, light reaction,inner membrane,light-harvesting complex (sensu Proteobacteria),electron transporter, transferring electrons within the cyclic electron transport pathway of photosynthesis activity	None
chromosome_1	55829319	-	T	A	Sb01g032875	0	1060	409	137	K	*	Elongation factor 1 beta/delta chain	ELONGATION FACTOR 1-BETA	EF-1 guanine nucleotide exchange domain	similar to Elongation factor 1-delta 2	translation elongation factor activity,eukaryotic translation elongation factor 1 complex,translational elongation	None
chromosome_1	56103092	+	C	A	Sb01g033040	1	1374	1257	419	Y	*	None	None	None	weakly similar to Putative uncharacterized protein	None	None
chromosome_1	56182980	+	G	A	Sb01g033060	2	5452	1830	610	W	*	Glycosyltransferase	GLYCOSYLTRANSFERASE	Sucrose synthase|Glycosyl transferases group 1	similar to Sucrose synthase 2	sucrose metabolism,biosynthesis	Sucrose synthase.;UDP-glucose + D-fructose = UDP + sucrose.;\N;\N;Starch and sucrose metabolism;Metabolism of Complex Carbohydrates;METABOLIC
chromosome_1	56328073	-	G	A	Sb01g033156	0	51	51	17	Q	*	None	None	None	similar to Putative uncharacterized protein OJ1512_E04.7	None	None
chromosome_1	56406154	-	C	T	Sb01g033180	2	1118	1008	336	W	*	Sugar transporter/spinster transmembrane protein	DRUG TRANSPORTER-RELATED	Major Facilitator Superfamily	similar to Transporter-like protein	transporter activity,transport,integral to membrane	None
chromosome_1	56407157	-	C	A	Sb01g033180	0	115	115	39	E	*	Sugar transporter/spinster transmembrane protein	DRUG TRANSPORTER-RELATED	Major Facilitator Superfamily	similar to Transporter-like protein	transporter activity,transport,integral to membrane	None
chromosome_1	56436231	-	C	A	Sb01g033215	0	492	333	111	E	*	None	None	None	Predicted protein	None	None
chromosome_1	56453334	-	G	A	Sb01g033220	0	1409	582	194	Q	*	Ca2+/H+ antiporter VCX1 and related proteins	None	Sodium/calcium exchanger protein|Sodium/calcium exchanger protein	similar to Vacuolar cation/proton exchanger 2 (Ca(2+)/H(+) exchanger 2)	cation transport,cation transporter activity,integral to membrane	None
chromosome_1	56527832	-	G	A	Sb01g033290	0	811	660	220	R	*	SWAP mRNA splicing regulator	FAMILY NOT NAMED	None	similar to Expressed protein	None	None
chromosome_1	56591632	+	G	A	Sb01g033350	2	2081	495	165	W	*	None	None	None	similar to Nodulation protein, putative, expressed	None	None
chromosome_1	56861353	-	C	A	Sb01g033520	0	39	39	13	E	*	Flavonol reductase/cinnamoyl-CoA reductase	NAD DEPENDENT EPIMERASE/DEHYDRATASE	NAD dependent epimerase/dehydratase family|3-beta hydroxysteroid dehydrogenase/isomerase family|Male sterility protein	similar to NAD dependent epimerase/dehydratase family protein, expressed	3-beta-hydroxy-delta5-steroid dehydrogenase activity,steroid biosynthesis	3-beta-hydroxy-4-alpha-methylcholestenecarboxylate 3-dehydrogenase (decarboxylating).;3-beta-hydroxy-4-alpha-methyl-5-alpha-cholest-7-ene-4-beta-carboxylate + NAD(+) = 4-alpha-methyl-5-alpha-cholest-7-en-3-one + CO(2) + NADH.;\N;\N;\N;\N;\N
chromosome_1	56984579	+	G	A	Sb01g033670	2	1153	672	224	W	*	None	None	Integral membrane protein DUF6|Integral membrane protein DUF6	similar to Nodulin-like protein	membrane	None
chromosome_1	56989829	+	G	A	Sb01g033680	2	2328	1625	542	W	*	None	REVERSE TRANSCRIPTASES	Leucine rich repeat N-terminal domain	Predicted protein	None	None
chromosome_1	56989893	+	T	G	Sb01g033680	1	2392	1689	563	Y	*	None	REVERSE TRANSCRIPTASES	Leucine rich repeat N-terminal domain	Predicted protein	None	None
chromosome_1	56990128	+	C	T	Sb01g033680	0	2627	1924	642	Q	*	None	REVERSE TRANSCRIPTASES	Leucine rich repeat N-terminal domain	Predicted protein	None	None
chromosome_1	57048247	-	G	A	Sb01g033750	0	4995	536	179	Q	*	20S proteasome, regulatory subunit alpha type PSMA2/PRE8	PROTEASOME SUBUNIT ALPHA/BETA	Proteasome A-type and B-type	similar to Proteasome subunit alpha type	endopeptidase activity,cysteine-type endopeptidase activity,threonine endopeptidase activity,proteasome core complex (sensu Eukaryota),proteolysis and peptidolysis,ubiquitin-dependent protein catabolism	Proteasome endopeptidase complex.;Cleavage at peptide bonds with very broad specificity.;\N;\N;\N;\N;\N
chromosome_1	57062385	-	C	T	Sb01g033760	1	701	531	177	W	*	DEAD box containing helicases	DNA2/NAM7 HELICASE FAMILY	None	similar to Expressed protein	None	None
chromosome_1	57258251	+	C	A	Sb01g033865	1	1539	1539	513	Y	*	Serine/threonine protein kinase	SERINE-THREONINE PROTEIN KINASE, PLANT-TYPE	Protein tyrosine kinase|Protein kinase domain|Protein kinase domain|Protein tyrosine kinase|Protein tyrosine kinase	Predicted protein	protein kinase activity,protein serine/threonine kinase activity,protein-tyrosine kinase activity,ATP binding,protein amino acid phosphorylation	Phosphotransferases with an alcohol group as acceptor.;\N;\N;\N;Sphingoglycolipid metabolism;Metabolism of Complex Lipids;METABOLIC,Phosphotransferases with an alcohol group as acceptor.;\N;\N;\N;Benzoate degradation via CoA ligation;Biodegradation of Xenobiotics;METABOLIC,Phosphotransferases with an alcohol group as acceptor.;\N;\N;\N;Starch and sucrose metabolism;Metabolism of Complex Carbohydr…
chromosome_1	57353293	+	G	A	Sb01g033920	1	612	463	155	W	*	None	None	None	weakly similar to Expressed protein	None	None
chromosome_1	57408962	-	C	T	Sb01g034010	2	4301	1797	599	W	*	None	None	Putative methyltransferase|Methyltransferase domain	similar to Methyltransferase, putative, expressed	molecular function unknown,methyltransferase activity	None
chromosome_1	57637239	-	G	A	Sb01g034190	0	393	393	131	R	*	None	None	X8 domain	similar to Putative glucanase	hydrolase activity, hydrolyzing O-glycosyl compounds,carbohydrate metabolism	Glucan endo-1,3-beta-D-glucosidase.;Hydrolysis of 1,3-beta-D-glucosidic linkages in 1,3-beta-D-glucans.;\N;\N;Starch and sucrose metabolism;Metabolism of Complex Carbohydrates;METABOLIC
chromosome_1	57637263	-	G	A	Sb01g034190	0	369	369	123	Q	*	None	None	X8 domain	similar to Putative glucanase	hydrolase activity, hydrolyzing O-glycosyl compounds,carbohydrate metabolism	Glucan endo-1,3-beta-D-glucosidase.;Hydrolysis of 1,3-beta-D-glucosidic linkages in 1,3-beta-D-glucans.;\N;\N;Starch and sucrose metabolism;Metabolism of Complex Carbohydrates;METABOLIC
chromosome_1	57768292	-	A	T	Sb01g034290	2	1657	378	126	L	*	Cytochrome P450 CYP4/CYP19/CYP26 subfamilies	CYTOCHROME P450	Cytochrome P450	weakly similar to Putative uncharacterized protein	monooxygenase activity,electron transport	Thromboxane-A synthase.;(5Z,13E)-(15S)-9-alpha,11-alpha-epidioxy-15-hydroxyprosta-5,13-dienoate = (5Z,13E)-(15S)-9-alpha,11-alpha-epoxy-15-hydroxythromba-5,13-dienoate.;Heme-thiolate.;Hemorrhagic diathesis due to deficiency of thromboxane; MIM:274180.;Prostaglandin and leukotriene metabolism;Metabolism of Complex Lipids;METABOLIC
chromosome_1	57769667	-	G	A	Sb01g034290	0	282	282	94	Q	*	Cytochrome P450 CYP4/CYP19/CYP26 subfamilies	CYTOCHROME P450	Cytochrome P450	weakly similar to Putative uncharacterized protein	monooxygenase activity,electron transport	Thromboxane-A synthase.;(5Z,13E)-(15S)-9-alpha,11-alpha-epidioxy-15-hydroxyprosta-5,13-dienoate = (5Z,13E)-(15S)-9-alpha,11-alpha-epoxy-15-hydroxythromba-5,13-dienoate.;Heme-thiolate.;Hemorrhagic diathesis due to deficiency of thromboxane; MIM:274180.;Prostaglandin and leukotriene metabolism;Metabolism of Complex Lipids;METABOLIC
chromosome_1	57780320	-	G	A	Sb01g034310	0	252	142	48	R	*	None	CYTOCHROME P450	None	similar to Putative uncharacterized protein	monooxygenase activity,electron transport	None
chromosome_1	57821366	-	G	A	Sb01g034380	0	2920	2820	940	R	*	None	None	Protein of unknown function, DUF537	weakly similar to Expressed protein	None	None
chromosome_1	57821459	-	G	A	Sb01g034380	0	2827	2727	909	R	*	None	None	Protein of unknown function, DUF537	weakly similar to Expressed protein	None	None
chromosome_1	57822990	-	C	T	Sb01g034380	1	1296	1196	399	W	*	None	None	Protein of unknown function, DUF537	weakly similar to Expressed protein	None	None
chromosome_1	57823595	-	G	A	Sb01g034380	0	691	591	197	Q	*	None	None	Protein of unknown function, DUF537	weakly similar to Expressed protein	None	None
chromosome_1	58263702	-	C	T	Sb01g034830	1	1232	1144	382	W	*	None	TRANSPOSASE-LIKE PROTEIN	None	Predicted protein	None	None
chromosome_1	58264016	-	C	A	Sb01g034830	0	918	918	306	E	*	None	TRANSPOSASE-LIKE PROTEIN	None	Predicted protein	None	None
chromosome_1	58420831	-	C	A	Sb01g034950	0	1121	645	215	E	*	Actin regulatory proteins (gelsolin/villin family)	VILLIN	Gelsolin repeat|Gelsolin repeat|Gelsolin repeat|Gelsolin repeat|Gelsolin repeat|Gelsolin repeat|Villin headpiece domain	similar to Putative uncharacterized protein	actin binding,cytoskeleton organization and biogenesis	None
chromosome_1	58421770	-	G	T	Sb01g034950	2	182	87	29	S	*	Actin regulatory proteins (gelsolin/villin family)	VILLIN	Gelsolin repeat|Gelsolin repeat|Gelsolin repeat|Gelsolin repeat|Gelsolin repeat|Gelsolin repeat|Villin headpiece domain	similar to Putative uncharacterized protein	actin binding,cytoskeleton organization and biogenesis	None
chromosome_1	58579141	-	G	T	Sb01g035060	2	2382	875	292	S	*	None	None	ATP synthase regulation protein NCA2	similar to Expressed protein	None	None
chromosome_1	58625528	+	C	T	Sb01g035105	0	346	169	57	Q	*	None	DIPHTHINE SYNTHASE	None	weakly similar to Diphthine synthase	None	None
chromosome_1	58646594	-	C	A	Sb01g035140	0	379	171	57	E	*	None	None	Terpene synthase family, metal binding domain	similar to Terpene synthase 8	None	None
chromosome_1	58721223	-	G	T	Sb01g035200	1	2777	864	288	Y	*	17 beta-hydroxysteroid dehydrogenase type 3, HSD17B3	SHORT-CHAIN DEHYDROGENASES/REDUCTASE	short chain dehydrogenase	similar to Oxidoreductase, short chain dehydrogenase/reductase family protein, expressed	metabolism,oxidoreductase activity	With NAD(+) or NADP(+) as acceptor.;\N;\N;\N;Bile acid biosynthesis;Lipid Metabolism;METABOLIC,With NAD(+) or NADP(+) as acceptor.;\N;\N;\N;Vitamin B6 metabolism;Metabolism of Cofactors and Vitamins;METABOLIC,With NAD(+) or NADP(+) as acceptor.;\N;\N;\N;Glycine, serine and threonine metabolism;Amino Acid Metabolism;METABOLIC,With NAD(+) or NADP(+) as acceptor.;\N;\N;\N;Butanoate metabolism;Carboh…
chromosome_1	58762236	-	G	T	Sb01g035230	1	312	154	52	Y	*	Uncharacterized conserved protein	FAMILY NOT NAMED	None	similar to Aberrant pollen transmission 1	None	None
chromosome_1	58809621	-	A	C	Sb01g035270	2	3622	1650	550	L	*	SNF2 family DNA-dependent ATPase	ATP-DEPENDENT HELICASE SMARCA (SWI/SNF-RELATED MATRIX-ASSOCIATED ACTIN-DEPENDENT REGULATOR OF CHROMATIN A)-RELATED	SNF2 family N-terminal domain|Helicase conserved C-terminal domain	similar to Transcriptional activator, putative, expressed	nucleic acid binding,DNA binding,helicase activity,ATP binding,ATP-dependent helicase activity	Adenosinetriphosphatase.;ATP + H(2)O = ADP + phosphate.;\N;Hemolytic anemia due to deficiency of adenosine triphosphatase; MIM:102800.;Purine metabolism;Nucleotide Metabolism;METABOLIC
chromosome_1	58811132	-	G	C	Sb01g035270	1	2111	728	243	Y	*	SNF2 family DNA-dependent ATPase	ATP-DEPENDENT HELICASE SMARCA (SWI/SNF-RELATED MATRIX-ASSOCIATED ACTIN-DEPENDENT REGULATOR OF CHROMATIN A)-RELATED	SNF2 family N-terminal domain|Helicase conserved C-terminal domain	similar to Transcriptional activator, putative, expressed	nucleic acid binding,DNA binding,helicase activity,ATP binding,ATP-dependent helicase activity	Adenosinetriphosphatase.;ATP + H(2)O = ADP + phosphate.;\N;Hemolytic anemia due to deficiency of adenosine triphosphatase; MIM:102800.;Purine metabolism;Nucleotide Metabolism;METABOLIC
chromosome_1	58811629	-	C	A	Sb01g035270	0	1614	231	77	E	*	SNF2 family DNA-dependent ATPase	ATP-DEPENDENT HELICASE SMARCA (SWI/SNF-RELATED MATRIX-ASSOCIATED ACTIN-DEPENDENT REGULATOR OF CHROMATIN A)-RELATED	SNF2 family N-terminal domain|Helicase conserved C-terminal domain	similar to Transcriptional activator, putative, expressed	nucleic acid binding,DNA binding,helicase activity,ATP binding,ATP-dependent helicase activity	Adenosinetriphosphatase.;ATP + H(2)O = ADP + phosphate.;\N;Hemolytic anemia due to deficiency of adenosine triphosphatase; MIM:102800.;Purine metabolism;Nucleotide Metabolism;METABOLIC
chromosome_1	58932666	-	G	A	Sb01g035380	0	4195	861	287	R	*	UDP-glucose 4-epimerase/UDP-sulfoquinovose synthase	NAD DEPENDENT EPIMERASE/DEHYDRATASE	NAD dependent epimerase/dehydratase family	similar to UDP-glucose-4-epimerase	catalytic activity,UDP-glucose 4-epimerase activity,galactose metabolism,nucleotide-sugar metabolism	UDP-glucose 4-epimerase.;UDP-glucose = UDP-galactose.;NAD.;Galactose epimerase deficiency; MIM:230350.;Galactose metabolism;Carbohydrate Metabolism;METABOLIC,UDP-glucose 4-epimerase.;UDP-glucose = UDP-galactose.;NAD.;Galactose epimerase deficiency; MIM:230350.;Nucleotide sugars metabolism;Nucleotide Metabolism;METABOLIC
chromosome_1	59007207	-	G	C	Sb01g035470	1	310	221	74	Y	*	Peptidyl-tRNA hydrolase	PEPTIDYL-TRNA HYDROLASE	Peptidyl-tRNA hydrolase	similar to Chromosome chr6 scaffold_3, whole genome shotgun sequence	aminoacyl-tRNA hydrolase activity,protein biosynthesis	None
chromosome_1	59209134	+	C	T	Sb01g035565	0	3618	808	270	R	*	None	REVERSE TRANSCRIPTASES	None	Predicted protein	None	None
chromosome_1	59248047	+	G	A	Sb01g035620	1	9902	2989	997	W	*	AAA+-type ATPase	AAA ATPASE	ATPase family associated with various cellular activities (AAA)|ATPase family associated with various cellular activities (AAA)	similar to AAA-type ATPase family protein, putative, expressed	nucleotide binding,ATP binding,nucleoside-triphosphatase activity	Adenosinetriphosphatase.;ATP + H(2)O = ADP + phosphate.;\N;Hemolytic anemia due to deficiency of adenosine triphosphatase; MIM:102800.;Purine metabolism;Nucleotide Metabolism;METABOLIC
chromosome_1	59412282	-	C	A	Sb01g035770	0	1575	825	275	G	*	Uncharacterized conserved protein	FAMILY NOT NAMED	Utp14 protein	similar to Utp14 protein, expressed	None	None
chromosome_1	59422300	+	G	A	Sb01g035785	2	62	62	21	W	*	None	None	None	Predicted protein	None	None
chromosome_1	59654400	-	G	T	Sb01g035980	1	290	255	85	Y	*	Pseudouridylate synthase	PSEUDOURIDYLATE SYNTHASE	tRNA pseudouridine synthase	similar to TRNA pseudouridine synthase family protein, expressed	pseudouridylate synthase activity,tRNA processing	Pseudouridylate synthase.;Uracil + D-ribose 5-phosphate = pseudouridine 5'-phosphate + H(2)O.;\N;\N;Pyrimidine metabolism;Nucleotide Metabolism;METABOLIC
chromosome_1	59689834	-	C	A	Sb01g036050	0	618	424	142	E	*	None	None	K+ potassium transporter	similar to Putative potassium transporter 8	potassium ion transport,potassium ion transporter activity,membrane	None
chromosome_1	59708381	-	G	T	Sb01g036080	1	4812	1406	469	C	*	None	FAMILY NOT NAMED	Nucleotidyltransferase domain|PAP/25A associated domain	weakly similar to Expressed protein	nucleic acid binding,nucleotidyltransferase activity	None
chromosome_1	59763674	-	G	A	Sb01g036160	0	2956	2474	825	R	*	Serine/threonine protein kinase	SERINE-THREONINE PROTEIN KINASE, PLANT-TYPE	Leucine rich repeat N-terminal domain|Leucine Rich Repeat|Leucine Rich Repeat|Leucine Rich Repeat|Leucine Rich Repeat|Leucine Rich Repeat|Leucine Rich Repeat|Leucine Rich Repeat|Leucine Rich Repeat|Leucine Rich Repeat|Leucine Rich Repeat|Leucine Rich Repeat|Leucine Rich Repeat|Leucine Rich Repeat|Leucine Rich Repeat|Leucine Rich Repeat|Leucine Rich Repeat|Leucine Rich Repeat|Leucine Rich Repeat|P…	similar to Leucine-rich repeat transmembrane protein kinase, putative, expressed	protein kinase activity,protein serine/threonine kinase activity,protein-tyrosine kinase activity,ATP binding,protein amino acid phosphorylation	Phosphotransferases with an alcohol group as acceptor.;\N;\N;\N;Sphingoglycolipid metabolism;Metabolism of Complex Lipids;METABOLIC,Phosphotransferases with an alcohol group as acceptor.;\N;\N;\N;Benzoate degradation via CoA ligation;Biodegradation of Xenobiotics;METABOLIC,Phosphotransferases with an alcohol group as acceptor.;\N;\N;\N;Starch and sucrose metabolism;Metabolism of Complex Carbohydr…
chromosome_1	59812454	-	G	A	Sb01g036183	0	32	32	11	Q	*	None	None	None	similar to Putative uncharacterized protein	None	None
chromosome_1	59817460	-	G	A	Sb01g036186	0	2086	1357	453	Q	*	None	None	None	similar to Putative uncharacterized protein	None	None
chromosome_1	59817505	-	G	A	Sb01g036186	0	2041	1312	438	Q	*	None	None	None	similar to Putative uncharacterized protein	None	None
chromosome_1	59817643	-	G	A	Sb01g036186	0	1903	1174	392	Q	*	None	None	None	similar to Putative uncharacterized protein	None	None
chromosome_1	59843497	-	A	T	Sb01g036200	2	3716	2796	932	L	*	P-type ATPase	CATION-TRANSPORTING ATPASE	haloacid dehalogenase-like hydrolase	similar to Phospholipid-translocating P-type ATPase, flippase family protein, expressed	catalytic activity,ATP binding,cation transport,metabolism,ATPase activity, coupled to transmembrane movement of ions, phosphorylative mechanism,membrane,integral to membrane,ATPase activity	Magnesium-ATPase.;ATP + H(2)O = ADP + phosphate.;Magnesium.;Progressive familial intrahepatic cholestasis; MIM:211600. Benign recurrent intrahepatic cholestasis; MIM:243300.;\N;\N;\N
chromosome_1	59893234	-	G	A	Sb01g036260	0	706	520	174	Q	*	Serine/threonine protein kinase	SERINE-THREONINE PROTEIN KINASE, PLANT-TYPE	Protein tyrosine kinase|Protein kinase domain	similar to Putative uncharacterized protein	protein kinase activity,protein serine/threonine kinase activity,protein-tyrosine kinase activity,ATP binding,protein amino acid phosphorylation	None
chromosome_1	59900778	-	G	C	Sb01g036270	2	4494	1929	643	S	*	GTP-binding protein AARP2 involved in 40S ribosome biogenesis	RIBOSOME BIOGENESIS PROTEIN	AARP2CN (NUC121) domain|Protein of unknown function (DUF663)	similar to Os03g0333100 protein	None	None
chromosome_1	59922243	-	A	T	Sb01g036290	2	697	1641	547	L	*	Serine/threonine protein kinase	SERINE-THREONINE PROTEIN KINASE, PLANT-TYPE	Leucine rich repeat N-terminal domain|Leucine Rich Repeat|Leucine Rich Repeat|Leucine Rich Repeat|Leucine Rich Repeat|Leucine Rich Repeat|Leucine Rich Repeat|Protein tyrosine kinase|Protein kinase domain	similar to Protein kinase domain containing protein, expressed	protein kinase activity,ATP binding,protein amino acid phosphorylation	Phosphotransferases with an alcohol group as acceptor.;\N;\N;\N;Sphingoglycolipid metabolism;Metabolism of Complex Lipids;METABOLIC,Phosphotransferases with an alcohol group as acceptor.;\N;\N;\N;Benzoate degradation via CoA ligation;Biodegradation of Xenobiotics;METABOLIC,Phosphotransferases with an alcohol group as acceptor.;\N;\N;\N;Starch and sucrose metabolism;Metabolism of Complex Carbohydr…
chromosome_1	59948998	-	C	A	Sb01g036350	0	4599	1489	497	E	*	None	BROMODOMAIN CONTAINING PROTEIN	Bromodomain	weakly similar to Bromodomain containing protein, expressed	None	None
chromosome_1	59985797	+	C	T	Sb01g036375	0	1379	139	47	Q	*	None	None	None	similar to Fasciclin-like protein FLA33	None	None
chromosome_1	59985845	+	G	T	Sb01g036375	0	1427	187	63	E	*	None	None	None	similar to Fasciclin-like protein FLA33	None	None
chromosome_1	60017699	+	C	T	Sb01g036410	0	3653	1436	479	Q	*	None	None	None	similar to Expressed protein	None	Exo-alpha-sialidase.;Hydrolysis of alpha-(2->3)-, alpha-(2->6)-, alpha-(2->8)-glycosidic linkages of terminal sialic residues in oligosaccharides, glycoproteins, glycolipids, colominic acid and synthetic substrates.;\N;Sialidosis; MIM:256550.;N-Glycan degradation;Metabolism of Complex Carbohydrates;METABOLIC,Exo-alpha-sialidase.;Hydrolysis of alpha-(2->3)-, alpha-(2->6)-, alpha-(2->8)-glycosidic …
chromosome_1	60051411	-	C	A	Sb01g036440	0	2969	2118	706	E	*	None	None	Myb-like DNA-binding domain	similar to Myb-like DNA-binding domain, SHAQKYF class family protein, expressed	None	None
chromosome_1	60132537	+	C	T	Sb01g036510	0	31	31	11	Q	*	Nucleoside phosphatase	ADENOSINE/GUANOSINE DIPHOSPHATASE	GDA1/CD39 (nucleoside phosphatase) family	similar to Putative uncharacterized protein	rhodopsin-like receptor activity,G-protein coupled receptor protein signaling pathway,integral to membrane,hydrolase activity	Nucleoside-triphosphatase.;NTP + H(2)O = NDP + phosphate.;\N;\N;Thiamine metabolism;Metabolism of Cofactors and Vitamins;METABOLIC,Nucleoside-triphosphatase.;NTP + H(2)O = NDP + phosphate.;\N;\N;Purine metabolism;Nucleotide Metabolism;METABOLIC
chromosome_1	60237176	-	C	T	Sb01g036610	1	357	357	119	W	*	None	None	None	Predicted protein	None	None
chromosome_1	60272561	-	C	T	Sb01g036660	2	1979	557	186	W	*	None	None	None	similar to Os03g0325900 protein	None	None
chromosome_1	60370381	-	C	A	Sb01g036750	0	1046	512	171	E	*	None	None	Protease inhibitor/seed storage/LTP family	similar to Protease inhibitor/seed storage/LTP family protein, expressed	None	None
chromosome_1	60406282	+	C	T	Sb01g036803	0	223	223	75	R	*	None	None	None	Predicted protein	None	DNA-directed RNA polymerase.;N nucleoside triphosphate = N diphosphate + {RNA}(N).;\N;\N; RNA polymerase;TRANSCRIPTION;REGULATORY,DNA-directed RNA polymerase.;N nucleoside triphosphate = N diphosphate + {RNA}(N).;\N;\N;Purine metabolism;Nucleotide Metabolism;METABOLIC,DNA-directed RNA polymerase.;N nucleoside triphosphate = N diphosphate + {RNA}(N).;\N;\N;Pyrimidine metabolism;Nucleotide Metaboli…
chromosome_1	60427963	-	G	A	Sb01g036850	0	274	114	38	Q	*	Cytosine deaminase FCY1 and related enzymes	CYTOSINE DEAMINASE	Cytidine and deoxycytidylate deaminase zinc-binding region	similar to Cytidine and deoxycytidylate deaminase zinc-binding region family protein, expressed	zinc ion binding,hydrolase activity	Cytosine deaminase.;Cytosine + H(2)O = uracil + NH(3).;\N;\N;Pyrimidine metabolism;Nucleotide Metabolism;METABOLIC
chromosome_1	60528725	-	G	A	Sb01g036990	0	52	52	18	Q	*	None	None	None	similar to Putative non-LTR retroelement reverse transcriptase	None	None
chromosome_1	60543343	-	G	A	Sb01g037010	0	3221	279	93	R	*	Calmodulin and related proteins (EF-Hand superfamily)	CALCIUM BINDING PROTEIN	EF hand|EF hand|EF hand|EF hand	similar to Calmodulin-2	calcium ion binding	None
chromosome_1	60553125	-	G	A	Sb01g037020	0	1613	1488	496	R	*	None	None	None	similar to Putative uncharacterized protein	None	Acid--D-amino-acid ligases (peptide synthases).;\N;\N;\N;Tryptophan metabolism;Amino Acid Metabolism;METABOLIC,Acid--D-amino-acid ligases (peptide synthases).;\N;\N;\N;Ubiquinone biosynthesis;Metabolism of Cofactors and Vitamins;METABOLIC
chromosome_1	60620140	-	G	A	Sb01g037070	0	5107	2217	739	R	*	Aspartyl protease	PENTATRICOPEPTIDE REPEAT-CONTAINING PROTEIN	PPR repeat|PPR repeat|PPR repeat|PPR repeat|PPR repeat	similar to Pentatricopeptide, putative	aspartic-type endopeptidase activity,pepsin A activity,proteolysis and peptidolysis	None
chromosome_1	60893727	-	G	T	Sb01g037330	1	95	95	32	C	*	None	ZINC FINGER FYVE DOMAIN CONTAINING PROTEIN	GDSL-like Lipase/Acylhydrolase	similar to GDSL-like Lipase/Acylhydrolase family protein, expressed	catalytic activity	None
chromosome_1	60974531	-	C	A	Sb01g037410	0	3056	1431	477	G	*	ATP-dependent RNA helicase	DEAD BOX ATP-DEPENDENT RNA HELICASE	DEAD/DEAH box helicase|Helicase conserved C-terminal domain	similar to DEAD-box ATP-dependent RNA helicase 24	nucleic acid binding,cysteine-type endopeptidase activity,helicase activity,ATP binding,proteolysis and peptidolysis,ATP-dependent helicase activity	In phosphorous-containing anhydrides.;\N;\N;\N;Starch and sucrose metabolism;Metabolism of Complex Carbohydrates;METABOLIC,In phosphorous-containing anhydrides.;\N;\N;\N;Folate biosynthesis;Metabolism of Cofactors and Vitamins;METABOLIC
chromosome_1	61026847	-	G	T	Sb01g037470	2	1360	498	166	S	*	None	None	NHL repeat	similar to Os10g0443000 protein	None	None
chromosome_1	61048574	-	C	T	Sb01g037483	1	2479	455	152	W	*	Dipeptidyl aminopeptidase	PROTEASE FAMILY S9B,C DIPEPTIDYL-PEPTIDASE IV-RELATED	Prolyl oligopeptidase family	similar to Prolyl oligopeptidase family protein, expressed	None	Acylaminoacyl-peptidase.;Acylaminoacyl-peptide + H(2)O = acylamino acid + peptide.;\N;\N;\N;\N;\N
chromosome_1	61060488	-	G	T	Sb01g037490	2	2210	355	119	S	*	None	None	None	similar to Expressed protein	None	None
chromosome_1	61085276	+	G	T	Sb01g037525	0	4657	1204	402	E	*	Mitochondrial ATP-dependent protease PIM1/LON	ATP DEPENDENT LON PROTEASE FAMILY MEMBER	ATP-dependent protease La (LON) domain|ATPase family associated with various cellular activities (AAA)|ATPase family associated with various cellular activities (AAA)|Lon protease (S16) C-terminal proteolytic domain	similar to Lon protease homolog	nucleotide binding,translation elongation factor activity,ATP-dependent peptidase activity,serine-type endopeptidase activity,ATP binding,eukaryotic translation elongation factor 1 complex,translational elongation,proteolysis and peptidolysis,ATP-dependent proteolysis,nucleoside-triphosphatase activity	Serine endopeptidases.;\N;\N;\N;\N;\N;\N
chromosome_1	61204566	-	C	A	Sb01g037640	0	2825	2604	868	E	*	None	NUCLEAR PROTEIN 95	BRCA1 C Terminus (BRCT) domain|BRCA1 C Terminus (BRCT) domain|PHD-finger	weakly similar to BRCA1 C Terminus domain containing protein, expressed	DNA binding,intracellular,regulation of transcription, DNA-dependent	None
chromosome_1	61297219	-	C	T	Sb01g037710	1	594	79	27	W	*	None	None	None	similar to Replication protein A1	None	None
chromosome_1	61388859	-	C	T	Sb01g037820	2	1286	702	234	W	*	None	None	Calmodulin binding protein-like	similar to Calmodulin-binding protein, putative, expressed	None	None
chromosome_1	61394802	-	G	A	Sb01g037830	0	694	694	232	Q	*	None	CCCH ZINC FINGER/TIS11-RELATED	Zinc finger C-x8-C-x5-C-x3-H type (and similar)|Zinc finger C-x8-C-x5-C-x3-H type (and similar)	weakly similar to Zinc finger C-x8-C-x5-C-x3-H type family protein	nucleic acid binding	None
chromosome_1	61462379	-	G	A	Sb01g037910	0	12320	4082	1361	Q	*	Cytosolic Ca2+-dependent cysteine protease (calpain), large subunit (EF-Hand protein superfamily)	CALPAIN	Calpain family cysteine protease	similar to Dek1-calpain-like protein	DNA binding,cysteine-type endopeptidase activity,calpain activity,intracellular,DNA methylation,proteolysis and peptidolysis,N-methyltransferase activity	None
chromosome_1	61774116	-	G	A	Sb01g038220	0	2440	1260	420	Q	*	None	None	Glycosyl hydrolases family 17|X8 domain	similar to Glycosyl hydrolases family 17 protein, expressed	hydrolase activity, hydrolyzing O-glycosyl compounds,carbohydrate metabolism	Glucan endo-1,3-beta-D-glucosidase.;Hydrolysis of 1,3-beta-D-glucosidic linkages in 1,3-beta-D-glucans.;\N;\N;Starch and sucrose metabolism;Metabolism of Complex Carbohydrates;METABOLIC
chromosome_1	61774737	-	C	A	Sb01g038220	0	1819	639	213	E	*	None	None	Glycosyl hydrolases family 17|X8 domain	similar to Glycosyl hydrolases family 17 protein, expressed	hydrolase activity, hydrolyzing O-glycosyl compounds,carbohydrate metabolism	Glucan endo-1,3-beta-D-glucosidase.;Hydrolysis of 1,3-beta-D-glucosidic linkages in 1,3-beta-D-glucans.;\N;\N;Starch and sucrose metabolism;Metabolism of Complex Carbohydrates;METABOLIC
chromosome_1	61788512	-	G	A	Sb01g038245	0	282	282	94	R	*	None	None	None	Predicted protein	None	None
chromosome_1	62133870	-	C	A	Sb01g038620	0	3460	1246	416	E	*	Predicted hydrolase/acyltransferase (alpha/beta hydrolase superfamily)	ALPHA/BETA HYDROLASE RELATED	alpha/beta hydrolase fold	similar to Hydrolase, alpha/beta fold family protein, expressed	catalytic activity	None
chromosome_1	62196626	+	G	T	Sb01g038690	0	244	244	82	E	*	Splicing factor 1/branch point binding protein (RRM superfamily)	RNA-BINDING PROTEIN RELATED	KH domain|Zinc knuckle|Zinc knuckle|RNA recognition motif. (a.k.a. RRM, RBD, or RNP domain)	similar to Putative uncharacterized protein	nucleic acid binding	None
chromosome_1	62333209	-	C	A	Sb01g038840	0	4208	1944	648	G	*	None	TBC1 DOMAIN FAMILY MEMBER GTPASE-ACTIVATING PROTEIN	TBC domain	similar to Os03g0283800 protein	None	None
chromosome_1	62335664	-	G	A	Sb01g038840	0	1753	973	325	Q	*	None	TBC1 DOMAIN FAMILY MEMBER GTPASE-ACTIVATING PROTEIN	TBC domain	similar to Os03g0283800 protein	None	None
chromosome_1	62402064	-	G	T	Sb01g038917	2	2493	2432	811	S	*	Multidrug resistance-associated protein/mitoxantrone resistance protein, ABC superfamily	ATP-BINDING CASSETTE TRANSPORTER	ABC transporter transmembrane region|ABC transporter|ABC transporter transmembrane region	similar to Os01g0173900 protein	nucleotide binding,ATP binding,transport,integral to membrane,ATPase activity,nucleoside-triphosphatase activity,ATPase activity, coupled to transmembrane movement of substances	None
chromosome_1	62448601	+	C	G	Sb01g038980	2	2873	1430	477	S	*	None	FAMILY NOT NAMED	HEAT repeat|HEAT repeat	similar to HEAT repeat family protein, expressed	None	None
chromosome_1	62465303	-	G	T	Sb01g039000	1	2033	1770	590	Y	*	Serine/threonine protein kinase	SERINE-THREONINE PROTEIN KINASE, PLANT-TYPE	Protein kinase domain|Protein tyrosine kinase	similar to Protein kinase, putative, expressed	protein kinase activity,protein serine/threonine kinase activity,protein-tyrosine kinase activity,ATP binding,protein amino acid phosphorylation	None
chromosome_1	62524253	-	T	A	Sb01g039070	0	5543	2643	881	R	*	None	PHOSPHATIDYLINOSITOL N-ACETYLGLUCOSAMINYLTRANSFERASE SUBUNIT P (DOWN SYNDROME CRITICAL REGION PROTEIN 5)-RELATED	None	similar to Expressed protein	None	None
chromosome_1	62572803	-	C	A	Sb01g039130	0	1473	809	270	E	*	Uncharacterized conserved protein	FAMILY NOT NAMED	Zinc finger, C3HC4 type (RING finger)	similar to Zinc finger, C3HC4 type family protein, expressed	ubiquitin ligase complex,ubiquitin-protein ligase activity,zinc ion binding,protein ubiquitination	None
chromosome_1	62621111	+	G	T	Sb01g039160	0	73	73	25	E	*	None	None	None	similar to H0505F09.1 protein	negative regulation of protein biosynthesis,rRNA N-glycosylase activity	Myosin ATPase.;ATP + H(2)O = ADP + phosphate.;\N;\N;Purine metabolism;Nucleotide Metabolism;METABOLIC
chromosome_1	62623865	+	C	A	Sb01g039160	2	2827	956	319	S	*	None	None	None	similar to H0505F09.1 protein	negative regulation of protein biosynthesis,rRNA N-glycosylase activity	Myosin ATPase.;ATP + H(2)O = ADP + phosphate.;\N;\N;Purine metabolism;Nucleotide Metabolism;METABOLIC
chromosome_1	62623960	+	C	T	Sb01g039160	0	2922	985	329	Q	*	None	None	None	similar to H0505F09.1 protein	negative regulation of protein biosynthesis,rRNA N-glycosylase activity	Myosin ATPase.;ATP + H(2)O = ADP + phosphate.;\N;\N;Purine metabolism;Nucleotide Metabolism;METABOLIC
chromosome_1	62625152	+	G	T	Sb01g039160	0	4114	1516	506	E	*	None	None	None	similar to H0505F09.1 protein	negative regulation of protein biosynthesis,rRNA N-glycosylase activity	Myosin ATPase.;ATP + H(2)O = ADP + phosphate.;\N;\N;Purine metabolism;Nucleotide Metabolism;METABOLIC
chromosome_1	62625625	+	G	A	Sb01g039160	1	4587	1989	663	W	*	None	None	None	similar to H0505F09.1 protein	negative regulation of protein biosynthesis,rRNA N-glycosylase activity	Myosin ATPase.;ATP + H(2)O = ADP + phosphate.;\N;\N;Purine metabolism;Nucleotide Metabolism;METABOLIC
chromosome_1	62627207	-	G	A	Sb01g039170	0	1227	570	190	R	*	None	REVERSE TRANSCRIPTASES	None	similar to Putative reverse transcriptase	None	None
chromosome_1	62627572	-	G	T	Sb01g039170	2	862	205	69	S	*	None	REVERSE TRANSCRIPTASES	None	similar to Putative reverse transcriptase	None	None
chromosome_1	62627672	-	G	A	Sb01g039170	0	762	105	35	Q	*	None	REVERSE TRANSCRIPTASES	None	similar to Putative reverse transcriptase	None	None
chromosome_1	62657471	+	C	A	Sb01g039200	1	540	540	180	Y	*	None	None	None	similar to Expressed protein	None	None
chromosome_1	62837620	+	C	A	Sb01g039410	2	3249	937	313	S	*	Branching enzyme	GLYCOSYLTRANSFERASE 14 FAMILY MEMBER	Core-2/I-Branching enzyme	similar to Glycosyltransferase family 14 protein, putative, expressed	acetylglucosaminyltransferase activity,membrane	Protein xylosyltransferase.;Transfers a D-xylosyl residue from UDP-D-xylose to the serine hydroxyl group of an acceptor protein substrate.;\N;\N;Chondroitin / heparan sulfate biosynthesis;Metabolism of Complex Carbohydrates;METABOLIC
chromosome_1	62851890	-	G	T	Sb01g039440	2	4849	1439	480	S	*	Molecular chaperones GRP78/BiP/KAR2, HSP70 superfamily	HEAT SHOCK PROTEIN 70KDA	Hsp70 protein	similar to DnaK protein, putative	ATP binding	None
chromosome_1	62871420	-	C	A	Sb01g039450	0	1629	887	296	G	*	Molecular chaperones GRP78/BiP/KAR2, HSP70 superfamily	HEAT SHOCK PROTEIN 70KDA	Hsp70 protein	similar to Heat shock cognate 70 kDa protein	ATP binding	None
chromosome_1	62876882	-	G	T	Sb01g039460	2	2880	1416	472	S	*	Molecular chaperones GRP78/BiP/KAR2, HSP70 superfamily	HEAT SHOCK PROTEIN 70KDA	Hsp70 protein	similar to Heat shock cognate 70 kDa protein	ATP binding	None
chromosome_1	62900272	-	G	T	Sb01g039480	2	1250	468	156	S	*	Molecular chaperones GRP78/BiP/KAR2, HSP70 superfamily	HEAT SHOCK PROTEIN 70KDA	Hsp70 protein	similar to Heat shock cognate 70 kDa protein	ATP binding	None
chromosome_1	62923607	-	G	A	Sb01g039500	0	93	93	31	R	*	Molecular chaperones GRP78/BiP/KAR2, HSP70 superfamily	HEAT SHOCK PROTEIN 70KDA	Hsp70 protein	similar to Heat shock cognate 70 kDa protein	ATP binding	None
chromosome_1	62929144	-	C	T	Sb01g039510	2	1730	1230	410	W	*	Molecular chaperones GRP78/BiP/KAR2, HSP70 superfamily	HEAT SHOCK PROTEIN 70KDA	Hsp70 protein	similar to Heat shock cognate 70 kDa protein	ATP binding	None
chromosome_1	62935165	-	C	T	Sb01g039530	2	2384	1882	628	W	*	Molecular chaperones GRP78/BiP/KAR2, HSP70 superfamily	HEAT SHOCK PROTEIN 70KDA	Hsp70 protein	similar to Heat shock cognate 70 kDa protein	ATP binding	None
chromosome_1	62939570	+	G	T	Sb01g039536	0	172	172	58	E	*	None	None	None	similar to Putative uncharacterized protein	None	None
chromosome_1	62961776	+	G	T	Sb01g039553	0	994	994	332	E	*	None	REVERSE TRANSCRIPTASES	None	weakly similar to Os07g0115700 protein	None	None
chromosome_1	63193665	+	C	T	Sb01g039700	0	710	607	203	Q	*	None	None	Protein of unknown function, DUF1544|Protein of unknown function (DUF 659)|hAT family dimerisation domain	Predicted protein	protein dimerization activity	None
chromosome_1	63353390	+	G	T	Sb01g039910	0	232	232	78	E	*	None	GLYCOSYLTRANSFERASE	None	similar to Name	None	None
chromosome_1	63547000	+	C	A	Sb01g040160	1	460	384	128	C	*	SETA binding protein SB1 and related proteins, contain BTB/POZ domain	None	None	similar to Putative uncharacterized protein	voltage-gated potassium channel activity,potassium ion transport,voltage-gated potassium channel complex,membrane	None
chromosome_1	63792407	+	C	T	Sb01g040440	0	1847	730	244	Q	*	None	REVERSE TRANSCRIPTASES	None	similar to Putative reverse transcriptase	None	None
chromosome_1	63896962	-	G	A	Sb01g040540	0	542	264	88	R	*	None	None	Plastocyanin-like domain	similar to Chemocyanin, putative, expressed	electron transporter activity,copper ion binding,electron transport	None
chromosome_1	64104063	+	G	A	Sb01g040800	2	7480	3189	1063	W	*	WD40 repeat-containing protein	WD40 REPEAT PROTEIN	LisH|WD domain, G-beta repeat|WD domain, G-beta repeat|WD domain, G-beta repeat|WD domain, G-beta repeat|WD domain, G-beta repeat|WD domain, G-beta repeat|WD domain, G-beta repeat|WD domain, G-beta repeat|WD domain, G-beta repeat	similar to Expressed protein	None	None
chromosome_1	64452322	+	G	T	Sb01g041140	0	3862	2362	788	E	*	Guanine nucleotide exchange factor	GUANYL-NUCLEOTIDE EXCHANGE FACTOR	Sec7 domain	similar to Guanine nucleotide-exchange protein GEP2	None	None
chromosome_1	64547926	-	C	A	Sb01g041240	0	2191	462	154	E	*	None	DIHYDRODIPICOLINATE REDUCTASE	Dihydrodipicolinate reductase, N-terminus|Dihydrodipicolinate reductase, C-terminus	similar to Probable dihydrodipicolinate reductase 2, chloroplast precursor	dihydrodipicolinate reductase activity,lysine biosynthesis via diaminopimelate	Dihydrodipicolinate reductase.;2,3,4,5-tetrahydrodipicolinate + NAD(P)(+) = 2,3-dihydrodipicolinate + NAD(P)H.;\N;\N;Lysine biosynthesis;Amino Acid Metabolism;METABOLIC
chromosome_1	64592242	-	C	T	Sb01g041280	2	703	1266	422	W	*	None	None	Thaumatin family	similar to SCUTL1, putative, expressed	None	None
chromosome_1	64645538	+	C	T	Sb01g041340	0	293	55	19	Q	*	Actin depolymerizing factor	ACTIN DEPOLYMERIZING FACTOR	Cofilin/tropomyosin-type actin-binding protein	similar to Actin-depolymerizing factor 5	actin binding,intracellular	None
chromosome_1	64786563	-	G	T	Sb01g041470	1	1404	1404	468	Y	*	None	None	None	similar to Os03g0240400 protein	None	None
chromosome_1	64845247	-	C	T	Sb01g041540	2	1304	324	108	W	*	None	ACID PHOSPHATASE-RELATED	None	similar to Purple acid phosphatase 1, putative, expressed	None	Acid phosphatase.;An orthophosphoric monoester + H(2)O = an alcohol + phosphate.;\N;Acid phosphatase deficiency; MIM:200950.;gamma-Hexachlorocyclohexane degradation;Biodegradation of Xenobiotics;METABOLIC,Acid phosphatase.;An orthophosphoric monoester + H(2)O = an alcohol + phosphate.;\N;Acid phosphatase deficiency; MIM:200950.;Riboflavin metabolism;Metabolism of Cofactors and Vitamins;METABOLIC
chromosome_1	64855788	+	C	T	Sb01g041560	0	187	187	63	Q	*	None	None	None	similar to Putative uncharacterized protein	None	None
chromosome_1	65151481	-	G	A	Sb01g041910	0	2790	1110	370	Q	*	Serine/threonine protein kinase	SERINE-THREONINE PROTEIN KINASE, PLANT-TYPE	Protein kinase domain|Protein tyrosine kinase	similar to Putative uncharacterized protein	protein kinase activity,protein serine/threonine kinase activity,protein-tyrosine kinase activity,ATP binding,protein amino acid phosphorylation	Phosphotransferases with an alcohol group as acceptor.;\N;\N;\N;Sphingoglycolipid metabolism;Metabolism of Complex Lipids;METABOLIC,Phosphotransferases with an alcohol group as acceptor.;\N;\N;\N;Benzoate degradation via CoA ligation;Biodegradation of Xenobiotics;METABOLIC,Phosphotransferases with an alcohol group as acceptor.;\N;\N;\N;Starch and sucrose metabolism;Metabolism of Complex Carbohydr…
chromosome_1	65153788	-	G	C	Sb01g041910	2	483	483	161	S	*	Serine/threonine protein kinase	SERINE-THREONINE PROTEIN KINASE, PLANT-TYPE	Protein kinase domain|Protein tyrosine kinase	similar to Putative uncharacterized protein	protein kinase activity,protein serine/threonine kinase activity,protein-tyrosine kinase activity,ATP binding,protein amino acid phosphorylation	Phosphotransferases with an alcohol group as acceptor.;\N;\N;\N;Sphingoglycolipid metabolism;Metabolism of Complex Lipids;METABOLIC,Phosphotransferases with an alcohol group as acceptor.;\N;\N;\N;Benzoate degradation via CoA ligation;Biodegradation of Xenobiotics;METABOLIC,Phosphotransferases with an alcohol group as acceptor.;\N;\N;\N;Starch and sucrose metabolism;Metabolism of Complex Carbohydr…
chromosome_1	65216228	+	A	T	Sb01g041965	0	22	22	8	R	*	None	None	None	similar to ENSANGP00000024412	None	None
chromosome_1	65216234	+	A	T	Sb01g041965	0	28	28	10	R	*	None	None	None	similar to ENSANGP00000024412	None	None
chromosome_1	65216240	+	A	T	Sb01g041965	0	34	34	12	R	*	None	None	None	similar to ENSANGP00000024412	None	None
chromosome_1	65216246	+	A	T	Sb01g041965	0	40	40	14	R	*	None	None	None	similar to ENSANGP00000024412	None	None
chromosome_1	65355916	+	A	T	Sb01g042030	0	1225	557	186	R	*	Transcription factor NKX-5/HMX1, contains HOX domain	HOMEOBOX PROTEIN	Homeobox domain|Homeobox associated leucine zipper	weakly similar to Homeobox-leucine zipper protein HAT22	DNA binding,transcription factor activity,nucleus,regulation of transcription, DNA-dependent	None
chromosome_1	65378587	-	G	T	Sb01g042050	2	2286	517	173	S	*	Squalene monooxygenase	SARCOSINE OXIDASE	Squalene epoxidase	similar to Os03g0231800 protein	transcription factor activity,monooxygenase activity,intracellular,electron transport,regulation of transcription, DNA-dependent,aromatic compound metabolism,metabolism,oxidoreductase activity	Squalene monooxygenase.;Squalene + AH(2) + O(2) = (S)-squalene-2,3-epoxide + A + H(2)O.;FAD.;\N;Terpenoid biosynthesis;Biosynthesis of Secondary Metabolites;METABOLIC,Squalene monooxygenase.;Squalene + AH(2) + O(2) = (S)-squalene-2,3-epoxide + A + H(2)O.;FAD.;\N;Sterol biosynthesis;Lipid Metabolism;METABOLIC
chromosome_1	65451884	+	C	T	Sb01g042130	0	1845	1216	406	Q	*	None	REVERSE TRANSCRIPTASES	Endonuclease/Exonuclease/phosphatase family	weakly similar to H0215A08.3 protein	None	None
chromosome_1	65453818	+	G	A	Sb01g042140	1	1324	1152	384	W	*	None	REVERSE TRANSCRIPTASES	Reverse transcriptase (RNA-dependent DNA polymerase)	weakly similar to Putative polyprotein	RNA binding,RNA-directed DNA polymerase activity,RNA-dependent DNA replication	None
chromosome_1	65463386	-	G	A	Sb01g042160	0	679	626	209	R	*	None	PENTATRICOPEPTIDE REPEAT-CONTAINING PROTEIN	PPR repeat|PPR repeat|PPR repeat|PPR repeat|PPR repeat	similar to Drought-inducible protein 1OS	None	None
chromosome_1	65463853	-	A	T	Sb01g042160	2	212	159	53	L	*	None	PENTATRICOPEPTIDE REPEAT-CONTAINING PROTEIN	PPR repeat|PPR repeat|PPR repeat|PPR repeat|PPR repeat	similar to Drought-inducible protein 1OS	None	None
chromosome_1	65569258	-	G	A	Sb01g042280	0	4836	1722	574	R	*	Serine/threonine protein kinase	SERINE-THREONINE PROTEIN KINASE, PLANT-TYPE	Protein kinase domain|Protein tyrosine kinase	similar to Putative uncharacterized protein	protein kinase activity,protein serine/threonine kinase activity,protein-tyrosine kinase activity,ATP binding,protein amino acid phosphorylation	None
chromosome_1	65588207	-	C	A	Sb01g042300	0	1526	1272	424	E	*	None	gb def: Hypothetical protein At2g05120	None	similar to Nup133 nucleoporin family protein, expressed	transporter activity,nuclear pore,RNA transport	None
chromosome_1	65598224	-	G	A	Sb01g042320	0	501	268	90	Q	*	None	ZINC FINGER PROTEIN	None	similar to Putative uncharacterized protein	None	None
chromosome_1	65598230	-	G	A	Sb01g042320	0	495	262	88	Q	*	None	ZINC FINGER PROTEIN	None	similar to Putative uncharacterized protein	None	None
chromosome_1	65651170	+	C	G	Sb01g042380	1	1588	1227	409	Y	*	Trehalose-6-phosphate synthase component TPS1 and related subunits	TREHALOSE-6-PHOSPHATE SYNTHASE	Glycosyltransferase family 20|Trehalose-phosphatase	similar to Os03g0224300 protein	alpha,alpha-trehalose-phosphate synthase (UDP-forming) activity,trehalose-phosphatase activity,trehalose biosynthesis	None
chromosome_1	65731058	+	C	T	Sb01g042470	0	1528	1483	495	Q	*	Cytochrome P450 CYP4/CYP19/CYP26 subfamilies	CYTOCHROME P450	Cytochrome P450	similar to Cytochrome P450 family protein, expressed	monooxygenase activity,electron transport	Acting on paired donors, with incorporation or reduction of;\N;\N;\N;gamma-Hexachlorocyclohexane degradation;Biodegradation of Xenobiotics;METABOLIC,Acting on paired donors, with incorporation or reduction of;\N;\N;\N;Ascorbate and aldarate metabolism;Carbohydrate Metabolism;METABOLIC,Acting on paired donors, with incorporation or reduction of;\N;\N;\N;Flavonoids, stilbene and lignin biosynthesis…
chromosome_1	65931927	+	C	G	Sb01g042680	2	2472	1206	402	S	*	Molecular chaperones HSP70/HSC70, HSP70 superfamily	HEAT SHOCK PROTEIN 70KDA	Hsp70 protein	similar to DnaK protein, expressed	ATP binding	None
chromosome_1	66142577	-	C	T	Sb01g042855	2	1358	917	306	W	*	None	REVERSE TRANSCRIPTASES	Reverse transcriptase (RNA-dependent DNA polymerase)	similar to Os06g0484800 protein	RNA binding,RNA-directed DNA polymerase activity,RNA-dependent DNA replication	None
chromosome_1	66167761	-	C	T	Sb01g042890	1	805	403	135	W	*	Single-stranded DNA-binding replication protein A (RPA), large (70 kD) subunit and related ssDNA-binding proteins	REPLICATION FACTOR A 1, RFA1	Replication factor-A protein 1, N-terminal domain|OB-fold nucleic acid binding domain|Replication factor-A C terminal domain	similar to Replication protein A1	nucleic acid binding,DNA binding,nucleus,DNA replication	None
chromosome_1	66193482	-	G	A	Sb01g042920	0	6087	3462	1154	R	*	None	BLOM7	None	similar to Protein RIK	nucleic acid binding,nucleus,zinc ion binding	None
chromosome_1	66196179	-	G	A	Sb01g042920	0	3390	2375	792	Q	*	None	BLOM7	None	similar to Protein RIK	nucleic acid binding,nucleus,zinc ion binding	None
chromosome_1	66204172	-	G	A	Sb01g042930	0	1848	504	168	Q	*	F0F1-type ATP synthase, gamma subunit	ATP SYNTHASE GAMMA CHAIN	ATP synthase	similar to Chromosome chr17 scaffold_12, whole genome shotgun sequence	ATP synthesis coupled proton transport,membrane,proton-transporting two-sector ATPase complex,hydrogen-transporting ATP synthase activity, rotational mechanism,hydrogen-transporting ATPase activity, rotational mechanism	H(+)-transporting two-sector ATPase.;ATP + H(2)O + H(+)(In) = ADP + phosphate + H(+)(Out).;\N;\N;ATP synthesis;Energy Metabolism;METABOLIC,H(+)-transporting two-sector ATPase.;ATP + H(2)O + H(+)(In) = ADP + phosphate + H(+)(Out).;\N;\N; Flagellar assembly;\N;\N,H(+)-transporting two-sector ATPase.;ATP + H(2)O + H(+)(In) = ADP + phosphate + H(+)(Out).;\N;\N; Type III secretion system;SORTING AND D…
chromosome_1	66366556	+	G	T	Sb01g043040	0	1055	118	40	E	*	None	None	None	Predicted protein	None	None
chromosome_1	66391918	-	G	A	Sb01g043070	0	448	448	150	Q	*	None	FAMILY NOT NAMED	Targeting protein for Xklp2 (TPX2)	similar to Putative uncharacterized protein	None	None
chromosome_1	66413453	+	G	T	Sb01g043130	0	919	919	307	E	*	None	None	None	weakly similar to Putative uncharacterized protein	ATP binding,apoptosis	None
chromosome_1	66463611	-	C	T	Sb01g043210	1	1027	1027	343	W	*	None	None	None	weakly similar to Expressed protein	None	None
chromosome_1	66530040	+	C	T	Sb01g043310	0	1382	1267	423	Q	*	None	None	None	similar to Expressed protein	None	None
chromosome_1	66530508	+	G	T	Sb01g043310	0	1850	1735	579	E	*	None	None	None	similar to Expressed protein	None	None
chromosome_1	66711522	-	G	T	Sb01g043560	2	6985	3578	1193	S	*	None	XP-G/RAD2 DNA REPAIR ENDONUCLEASE FAMILY	XPG N-terminal domain|XPG I-region	similar to XPG I-region family protein, expressed	DNA binding,single-stranded DNA binding,nuclease activity,endonuclease activity,nucleus,DNA repair,nucleotide-excision repair	Exodeoxyribonuclease I.;Degradation of single-stranded DNA. It acts progressively in a 3'- to 5'-direction, releasing 5'-phosphomononucleotides.;\N;\N;\N;\N;\N
chromosome_1	66867042	-	G	A	Sb01g043740	0	2255	603	201	Q	*	None	None	None	similar to Expressed protein	None	None
chromosome_1	66973469	+	C	A	Sb01g043870	1	780	558	186	Y	*	None	None	None	similar to Putative uncharacterized protein	None	None
chromosome_1	67007310	+	A	T	Sb01g043900	0	3442	1003	335	K	*	None	FAMILY NOT NAMED	MT-A70|Methyladenine glycosylase	similar to Putative uncharacterized protein	DNA binding,nucleus,nucleobase, nucleoside, nucleotide and nucleic acid metabolism,DNA repair,DNA methylation,methyltransferase activity,N-methyltransferase activity,DNA-3-methyladenine glycosylase I activity	None
chromosome_1	67084932	-	G	A	Sb01g043960	0	2588	1431	477	Q	*	None	ZINC FINGER PROTEIN	Zinc finger, C2H2 type|RS4NT (NUC023) domain|Zinc finger, C2H2 type|Zinc finger, C2H2 type	similar to Zinc finger, C2H2 type family protein, expressed	nucleic acid binding,nucleus,zinc ion binding	None
chromosome_1	67115549	-	G	A	Sb01g044000	0	1759	3195	1065	R	*	Predicted transporter (major facilitator superfamily)	SUGAR TRANSPORTER	Major Facilitator Superfamily|Sugar (and other) transporter	similar to Sugar transporter family protein, expressed	transporter activity,sugar porter activity,transport,carbohydrate transport,membrane,integral to membrane	None
chromosome_1	67116317	-	G	A	Sb01g044000	0	991	2427	809	R	*	Predicted transporter (major facilitator superfamily)	SUGAR TRANSPORTER	Major Facilitator Superfamily|Sugar (and other) transporter	similar to Sugar transporter family protein, expressed	transporter activity,sugar porter activity,transport,carbohydrate transport,membrane,integral to membrane	None
chromosome_1	67332716	-	T	A	Sb01g044170	0	5128	2473	825	R	*	None	None	SWIM zinc finger|Zinc knuckle	Predicted protein	nucleic acid binding	None
chromosome_1	67388183	-	C	A	Sb01g044250	0	170	170	57	G	*	Translational repressor MPT5/PUF4 and related RNA-binding proteins (Puf superfamily)	RNA BINDING PROTEIN PUMILIO-RELATED	Pumilio-family RNA binding repeat|Pumilio-family RNA binding repeat	Predicted protein	RNA binding,mRNA metabolism	None
chromosome_1	67470828	-	C	T	Sb01g044360	2	1809	287	96	W	*	None	None	None	similar to Putative uncharacterized protein	None	None
chromosome_1	67508463	+	C	T	Sb01g044395	0	2002	1237	413	Q	*	None	NON-LTR RETROELEMENT REVERSE TRANSCRIPTASE RELATED	None	Predicted protein	None	None
chromosome_1	67580168	+	C	T	Sb01g044480	0	3568	819	273	R	*	Uncharacterized conserved protein, contains IPT/TIG domain	IQ CALMODULIN-BINDING MOTIF PROTEINS	CG-1 domain|IPT/TIG domain|Ankyrin repeat|Ankyrin repeat|IQ calmodulin-binding motif|IQ calmodulin-binding motif	similar to Putative uncharacterized protein	None	None
chromosome_1	67753988	+	C	T	Sb01g044620	0	1571	471	157	R	*	Transcription factor HEX, contains HOX and HALZ domains	HOMEOBOX PROTEIN	Homeobox domain|Homeobox associated leucine zipper	similar to Homeobox domain containing protein, expressed	DNA binding,transcription factor activity,nucleus,regulation of transcription, DNA-dependent	None
chromosome_1	67837451	-	G	T	Sb01g044660	2	7625	1251	417	S	*	Uncharacterized membrane protein, predicted efflux pump	MULTIDRUG RESISTANCE PUMP	MatE|MatE	similar to Os03g0188100 protein	multidrug transport,drug transporter activity,antiporter activity,membrane	None
chromosome_1	67882646	-	C	T	Sb01g044710	2	1298	436	146	W	*	None	None	GRAM domain	similar to Putative uncharacterized protein	None	None
chromosome_1	67951538	-	C	T	Sb01g044790	2	539	539	180	W	*	Aspartyl protease	ASPARTYL PROTEASES	None	similar to Radc1	None	Phosphotransferases with an alcohol group as acceptor.;\N;\N;\N;Sphingoglycolipid metabolism;Metabolism of Complex Lipids;METABOLIC,Phosphotransferases with an alcohol group as acceptor.;\N;\N;\N;Benzoate degradation via CoA ligation;Biodegradation of Xenobiotics;METABOLIC,Phosphotransferases with an alcohol group as acceptor.;\N;\N;\N;Starch and sucrose metabolism;Metabolism of Complex Carbohydr…
chromosome_1	68003315	-	A	T	Sb01g044830	1	3094	559	187	Y	*	Uroporphyrinogen III synthase UROS/HEM4	METHYLTETRAHYDROFOLATE:HOMOCYSTEINE METHYLTRANSFERASE RELATED	Uroporphyrinogen-III synthase HemD	similar to Uroporphyrinogen-III synthase family protein, putative, expressed	uroporphyrinogen-III synthase activity,porphyrin biosynthesis,heme biosynthesis	Uroporphyrinogen-III synthase.;Hydroxymethylbilane = uroporphyrinogen-III + H(2)O.;\N;\N;Porphyrin and chlorophyll metabolism;Metabolism of Cofactors and Vitamins;METABOLIC
chromosome_1	68059678	-	C	A	Sb01g044930	0	3989	1509	503	G	*	Glycosyl transferase, family 8 - glycogenin	GLYCOGENIN	Glycosyl transferase family 8	similar to Glycogenin glucosyltransferase, putative, expressed	carbohydrate biosynthesis,transferase activity, transferring hexosyl groups	None
chromosome_1	68155500	-	G	A	Sb01g044990	0	1252	464	155	R	*	None	MONOAMINE OXIDASE N	None	similar to Phytoene dehydrogenase, chloroplast/chromoplast precursor	None	None
chromosome_1	68156227	-	C	T	Sb01g044990	2	525	292	98	W	*	None	MONOAMINE OXIDASE N	None	similar to Phytoene dehydrogenase, chloroplast/chromoplast precursor	None	None
chromosome_1	68188936	-	A	C	Sb01g045010	2	1795	486	162	L	*	Serine/threonine protein kinase	SERINE-THREONINE PROTEIN KINASE, PLANT-TYPE	Leucine rich repeat N-terminal domain|Leucine Rich Repeat|Leucine Rich Repeat|Leucine Rich Repeat|Leucine Rich Repeat|Leucine Rich Repeat|Leucine Rich Repeat|Leucine Rich Repeat|Protein tyrosine kinase|Protein kinase domain	similar to Leucine-rich repeat transmembrane protein kinase 2	protein kinase activity,protein serine/threonine kinase activity,protein-tyrosine kinase activity,ATP binding,protein amino acid phosphorylation	Phosphotransferases with an alcohol group as acceptor.;\N;\N;\N;Sphingoglycolipid metabolism;Metabolism of Complex Lipids;METABOLIC,Phosphotransferases with an alcohol group as acceptor.;\N;\N;\N;Benzoate degradation via CoA ligation;Biodegradation of Xenobiotics;METABOLIC,Phosphotransferases with an alcohol group as acceptor.;\N;\N;\N;Starch and sucrose metabolism;Metabolism of Complex Carbohydr…
chromosome_1	68302341	-	G	A	Sb01g045130	0	2329	1326	442	R	*	None	None	Plant protein of unknown function (DUF936)	similar to Putative uncharacterized protein	nucleic acid binding	None
chromosome_1	68358362	+	C	G	Sb01g045200	1	3180	958	320	Y	*	Beta-1,4-mannosyltransferase	BETA1,4 MANNOSYLTRANSFERASE	Glycosyl transferases group 1	similar to Glycosyl transferase, group 1 family protein, expressed	DNA binding,nucleus,electron transport	Chitobiosyldiphosphodolichol alpha-mannosyltransferase.;GDP-mannose + chitobiosyldiphosphodolichol = GDP + alpha-D-mannosylchitobiosyldiphosphodolichol.;\N;\N;N-Glycans biosynthesis;Metabolism of Complex Carbohydrates;METABOLIC
chromosome_1	68386909	-	G	A	Sb01g045240	0	5253	2088	696	R	*	None	LIPOXYGENASE	PLAT/LH2 domain|Lipoxygenase	similar to Lipoxygenase	iron ion binding,electron transport,lipoxygenase activity	Lipoxygenase.;Linoleate + O(2) = (9Z,11E)-(13S)-13-hydroperoxyoctadeca-9,11-dienoate.;Iron.;\N;\N;\N;\N
chromosome_1	68387735	-	G	A	Sb01g045240	0	4427	1517	506	Q	*	None	LIPOXYGENASE	PLAT/LH2 domain|Lipoxygenase	similar to Lipoxygenase	iron ion binding,electron transport,lipoxygenase activity	Lipoxygenase.;Linoleate + O(2) = (9Z,11E)-(13S)-13-hydroperoxyoctadeca-9,11-dienoate.;Iron.;\N;\N;\N;\N
chromosome_1	68387802	-	C	T	Sb01g045240	1	4360	1450	484	W	*	None	LIPOXYGENASE	PLAT/LH2 domain|Lipoxygenase	similar to Lipoxygenase	iron ion binding,electron transport,lipoxygenase activity	Lipoxygenase.;Linoleate + O(2) = (9Z,11E)-(13S)-13-hydroperoxyoctadeca-9,11-dienoate.;Iron.;\N;\N;\N;\N
chromosome_1	68447461	-	C	T	Sb01g045330	2	1072	525	175	W	*	None	None	YGGT family	similar to YGGT family protein, expressed	membrane	None
chromosome_1	68528250	-	G	A	Sb01g045440	0	1804	672	224	R	*	None	None	None	Predicted protein	None	None
chromosome_1	68579500	-	G	A	Sb01g045490	0	500	202	68	Q	*	Predicted mitochondrial carrier protein	MITOCHONDRIAL CARRIER PROTEIN RELATED	Mitochondrial carrier protein|Mitochondrial carrier protein|Mitochondrial carrier protein	similar to Mitochondrial carrier, putative, expressed	binding,mitochondrial inner membrane,transport,membrane	None
chromosome_1	68611227	-	G	C	Sb01g045510	1	515	397	133	Y	*	Phosphatidylinositol transfer protein SEC14 and related proteins	SEC14 RELATED PROTEIN	CRAL/TRIO, N-terminus|CRAL/TRIO domain	similar to Phosphatidylinositol transfer-like	transporter activity,intracellular,transport	None
chromosome_1	68625951	-	G	T	Sb01g045530	2	1397	510	170	S	*	Replication factor C, subunit RFC4	REPLICATION FACTOR C / DNA POLYMERASE III GAMMA-TAU SUBUNIT	ATPase family associated with various cellular activities (AAA)|Replication factor C	similar to Os12g0176500 protein	nucleotide binding,DNA binding,ATP binding,DNA replication factor C complex,DNA replication,nucleoside-triphosphatase activity	DNA-directed DNA polymerase.;N deoxynucleoside triphosphate = N diphosphate + {DNA}(N).;\N;\N;Purine metabolism;Nucleotide Metabolism;METABOLIC,DNA-directed DNA polymerase.;N deoxynucleoside triphosphate = N diphosphate + {DNA}(N).;\N;\N; DNA polymerase;REPLICATION AND REPAIR;REGULATORY,DNA-directed DNA polymerase.;N deoxynucleoside triphosphate = N diphosphate + {DNA}(N).;\N;\N;Pyrimidine metabo…
chromosome_1	68635870	-	C	A	Sb01g045550	0	7432	5014	1672	G	*	Acetylglucosaminyltransferase EXT1/exostosin 1	EXOSTOSIN (HEPARAN SULFATE GLYCOSYLTRANSFERASE)-RELATED	EGF-like domain|EGF-like domain|EGF-like domain|EGF-like domain|Exostosin family	similar to Putative uncharacterized protein	None	Metalloendopeptidases.;\N;\N;\N;\N;\N;\N
chromosome_1	68651027	-	G	A	Sb01g045570	0	2681	899	300	R	*	Apoptosis-promoting RNA-binding protein TIA-1/TIAR (RRM superfamily)	RNA-BINDING PROTEIN	RNA recognition motif. (a.k.a. RRM, RBD, or RNP domain)|RNA recognition motif. (a.k.a. RRM, RBD, or RNP domain)|RNA recognition motif. (a.k.a. RRM, RBD, or RNP domain)	similar to Os03g0174100 protein	nucleic acid binding	None
chromosome_1	68656495	-	G	A	Sb01g045580	0	3172	563	188	R	*	None	RING FINGER PROTEIN 6/12/38	Zinc finger, C3HC4 type (RING finger)	similar to Zinc finger, C3HC4 type family protein, expressed	ubiquitin ligase complex,ubiquitin-protein ligase activity,cell adhesion,cell-matrix adhesion,zinc ion binding,integrin complex,protein ubiquitination	None
chromosome_1	68677309	+	G	T	Sb01g045620	0	1203	1068	356	E	*	Serine/threonine protein kinase	SERINE-THREONINE PROTEIN KINASE, PLANT-TYPE	Protein kinase domain|Protein tyrosine kinase	similar to Receptor-like kinase TAK33-like protein	protein kinase activity,protein serine/threonine kinase activity,protein-tyrosine kinase activity,transporter activity,ATP binding,protein amino acid phosphorylation,transport,membrane	None
chromosome_1	68887247	+	A	T	Sb01g045780	0	906	240	80	K	*	Serine/threonine protein kinase	SERINE-THREONINE PROTEIN KINASE, PLANT-TYPE	Protein kinase domain|Protein tyrosine kinase	similar to Serine/threonine-protein kinase NAK, putative, expressed	protein kinase activity,protein serine/threonine kinase activity,protein-tyrosine kinase activity,ATP binding,protein amino acid phosphorylation	Phosphotransferases with an alcohol group as acceptor.;\N;\N;\N;Sphingoglycolipid metabolism;Metabolism of Complex Lipids;METABOLIC,Phosphotransferases with an alcohol group as acceptor.;\N;\N;\N;Benzoate degradation via CoA ligation;Biodegradation of Xenobiotics;METABOLIC,Phosphotransferases with an alcohol group as acceptor.;\N;\N;\N;Starch and sucrose metabolism;Metabolism of Complex Carbohydr…
chromosome_1	68906843	+	C	A	Sb01g045820	2	4395	1078	360	S	*	Heme A farnesyltransferase	PRENYLTRANSFERASES	UbiA prenyltransferase family	similar to Putative uncharacterized protein	prenyltransferase activity,heme biosynthesis,protoheme IX farnesyltransferase activity,integral to membrane	None
chromosome_1	68971188	-	G	T	Sb01g045870	1	236	189	63	Y	*	Golgi transport complex COD1 protein	None	COG4 transport protein	similar to Chromosome chr15 scaffold_37, whole genome shotgun sequence	None	None
chromosome_1	68980246	+	C	T	Sb01g045900	0	1341	422	141	Q	*	None	None	Plant protein family	similar to Axi 1 protein, putative, expressed	None	None
chromosome_1	69006588	-	G	A	Sb01g045920	0	1064	521	174	R	*	D-ribulose-5-phosphate 3-epimerase	RIBULOSE-5-PHOSPHATE-3-EPIMERASE	Ribulose-phosphate 3 epimerase family	similar to Ribulose-phosphate 3-epimerase, chloroplast precursor	ribulose-phosphate 3-epimerase activity,carbohydrate metabolism	Ribulose-phosphate 3-epimerase.;D-ribulose 5-phosphate = D-xylulose 5-phosphate.;\N;\N;Pentose phosphate pathway;Carbohydrate Metabolism;METABOLIC,Ribulose-phosphate 3-epimerase.;D-ribulose 5-phosphate = D-xylulose 5-phosphate.;\N;\N;Carbon fixation;Energy Metabolism;METABOLIC,Ribulose-phosphate 3-epimerase.;D-ribulose 5-phosphate = D-xylulose 5-phosphate.;\N;\N;Pentose and glucuronate interconve…
chromosome_1	69133806	+	A	T	Sb01g046060	0	4455	1783	595	K	*	None	None	None	similar to Calmodulin-binding family protein, putative, expressed	None	None
chromosome_1	69231801	-	A	T	Sb01g046180	2	4691	2787	929	L	*	DNA repair protein, SNF2 family	ATP-DEPENDENT HELICASE SMARCA (SWI/SNF-RELATED MATRIX-ASSOCIATED ACTIN-DEPENDENT REGULATOR OF CHROMATIN A)-RELATED	SNF2 family N-terminal domain|Helicase conserved C-terminal domain	similar to Putative uncharacterized protein OJ1123F12.3	nucleic acid binding,DNA binding,helicase activity,ATP binding,ATP-dependent helicase activity	In phosphorous-containing anhydrides.;\N;\N;\N;Starch and sucrose metabolism;Metabolism of Complex Carbohydrates;METABOLIC,In phosphorous-containing anhydrides.;\N;\N;\N;Folate biosynthesis;Metabolism of Cofactors and Vitamins;METABOLIC
chromosome_1	69286032	+	C	T	Sb01g046240	0	736	301	101	R	*	None	None	Integral membrane protein DUF6|Integral membrane protein DUF6	similar to Integral membrane protein DUF6 containing protein, expressed	membrane	None
chromosome_1	69316346	+	T	A	Sb01g046245	2	125	125	42	L	*	None	None	SWIM zinc finger	weakly similar to Putative uncharacterized protein	None	None
chromosome_1	69604229	+	G	A	Sb01g046410	1	5224	1696	566	W	*	Sulfate/bicarbonate/oxalate exchanger SAT-1 and related transporters (SLC26 family)	SULFATE TRANSPORTER	Sulfate transporter family|STAS domain	similar to Sulfate transporter 3.1, putative, expressed	sulfate porter activity,sulfate transport,membrane	None
chromosome_1	69732741	+	T	G	Sb01g046550	1	1885	1209	403	Y	*	Uncharacterized high-glucose-regulated protein	YTH (YT521-B HOMOLOGY) DOMAIN-CONTAINING	YT521-B-like family	similar to YT521-B-like family protein, expressed	None	None
chromosome_1	69734413	+	A	T	Sb01g046550	0	3557	4657	1553	K	*	Uncharacterized high-glucose-regulated protein	YTH (YT521-B HOMOLOGY) DOMAIN-CONTAINING	YT521-B-like family	similar to YT521-B-like family protein, expressed	None	None
chromosome_1	69753225	-	G	A	Sb01g046585	0	2268	718	240	Q	*	None	POLYMYOSITIS/SCLERODERMA AUTOANTIGEN-RELATED	3'-5' exonuclease|HRDC domain	similar to 3'-5' exonuclease family protein, expressed	nucleic acid binding,intracellular,3'-5' exonuclease activity	None
chromosome_1	69858530	-	G	A	Sb01g046720	0	2170	875	292	R	*	Flavonol reductase/cinnamoyl-CoA reductase	NAD DEPENDENT EPIMERASE/DEHYDRATASE	NAD dependent epimerase/dehydratase family	similar to Putative uncharacterized protein	None	Dihydrokaempferol 4-reductase.;Cis-3,4-leucopelargonidin + NADP(+) = (+)-dihydrokaempferol + NADPH.;\N;\N;Flavonoids, stilbene and lignin biosynthesis;Biosynthesis of Secondary Metabolites;METABOLIC
chromosome_1	69881173	-	G	A	Sb01g046730	0	1744	1119	373	Q	*	Kynurenine 3-monooxygenase and related flavoprotein monooxygenases	MONOOXYGENASE	None	similar to FAD binding domain containing protein, expressed	monooxygenase activity,electron transport,aromatic compound metabolism,metabolism,disulfide oxidoreductase activity,oxidoreductase activity	Salicylate 1-monooxygenase.;Salicylate + NADH + O(2) = catechol + NAD(+) + H(2)O + CO(2).;FAD.;\N;Fluorene degradation;Biodegradation of Xenobiotics;METABOLIC,Salicylate 1-monooxygenase.;Salicylate + NADH + O(2) = catechol + NAD(+) + H(2)O + CO(2).;FAD.;\N;Nitorobenzene degradation;Biodegradation of Xenobiotics;METABOLIC
chromosome_1	69988059	-	G	A	Sb01g046870	0	3655	708	236	R	*	Ovo and related transcription factors	ZINC FINGER PROTEIN	Zinc finger, C2H2 type|Zinc finger, C2H2 type|Zinc finger, C2H2 type|Zinc finger, C2H2 type	weakly similar to Zinc finger, C2H2 type family protein, expressed	nucleic acid binding,nucleus,zinc ion binding	None
chromosome_1	70052597	+	C	G	Sb01g046960	2	448	228	76	S	*	None	None	Integral membrane protein DUF6|Integral membrane protein DUF6	similar to Integral membrane protein DUF6 containing protein, expressed	membrane	None
chromosome_1	70056819	-	G	T	Sb01g046970	2	642	548	183	S	*	None	None	None	similar to Putative uncharacterized protein	None	None
chromosome_1	70206331	-	G	T	Sb01g047112	2	55	55	19	S	*	None	None	None	weakly similar to Os03g0110600 protein	None	None
chromosome_1	70290698	-	C	T	Sb01g047190	2	1393	1322	441	W	*	Tam3-transposase (Ac family)	None	Protein of unknown function, DUF1544|Protein of unknown function (DUF 659)|hAT family dimerisation domain	Predicted protein	DNA binding,protein dimerization activity	None
chromosome_1	70350877	+	C	A	Sb01g047250	1	791	693	231	Y	*	Serine/threonine protein kinase	SERINE-THREONINE PROTEIN KINASE, PLANT-TYPE	Leucine rich repeat N-terminal domain|Leucine Rich Repeat|Leucine Rich Repeat|Leucine Rich Repeat|Leucine Rich Repeat|Leucine Rich Repeat|Leucine Rich Repeat|Leucine Rich Repeat|Leucine Rich Repeat|Leucine Rich Repeat|Leucine Rich Repeat|Leucine Rich Repeat|Leucine Rich Repeat|Leucine Rich Repeat|Leucine Rich Repeat|Leucine Rich Repeat|Leucine Rich Repeat|Leucine Rich Repeat|Leucine Rich Repeat|L…	similar to Os03g0145000 protein	protein kinase activity,protein serine/threonine kinase activity,protein-tyrosine kinase activity,ATP binding,protein amino acid phosphorylation	Phosphotransferases with an alcohol group as acceptor.;\N;\N;\N;Sphingoglycolipid metabolism;Metabolism of Complex Lipids;METABOLIC,Phosphotransferases with an alcohol group as acceptor.;\N;\N;\N;Benzoate degradation via CoA ligation;Biodegradation of Xenobiotics;METABOLIC,Phosphotransferases with an alcohol group as acceptor.;\N;\N;\N;Starch and sucrose metabolism;Metabolism of Complex Carbohydr…
chromosome_1	70398705	+	G	A	Sb01g047310	2	1943	1589	530	W	*	Acetylglucosaminyltransferase EXT1/exostosin 1	EXOSTOSIN (HEPARAN SULFATE GLYCOSYLTRANSFERASE)-RELATED	Exostosin family	similar to Xyloglucan galactosyltransferase KATAMARI 1, putative, expressed	membrane	None
chromosome_1	70414412	-	G	A	Sb01g047340	0	17882	3165	1055	Q	*	p53 inducible protein PIR121	P53 INDUCIBLE PROTEIN-RELATED	Cytoplasmic Fragile-X interacting family	similar to PIROGI, putative, expressed	None	None
chromosome_1	70665264	+	G	T	Sb01g047560	0	1416	241	81	E	*	Glutamyl-tRNA synthetase	GLUTAMYL-TRNA SYNTHETASE	tRNA synthetases class I (E and Q), catalytic domain|tRNA synthetases class I (E and Q), anti-codon binding domain	similar to Putative uncharacterized protein	tRNA ligase activity,glutamate-tRNA ligase activity,ATP binding,cytoplasm,tRNA aminoacylation for protein translation,glutamyl-tRNA aminoacylation	Glutamate--tRNA ligase.;ATP + L-glutamate + tRNA(Glu) = AMP + diphosphate + L-glutamyl- tRNA(Glu).;\N;\N;Glutamate metabolism;Amino Acid Metabolism;METABOLIC,Glutamate--tRNA ligase.;ATP + L-glutamate + tRNA(Glu) = AMP + diphosphate + L-glutamyl- tRNA(Glu).;\N;\N;Porphyrin and chlorophyll metabolism;Metabolism of Cofactors and Vitamins;METABOLIC,Glutamate--tRNA ligase.;ATP + L-glutamate + tRNA(Glu…
chromosome_1	70666527	+	G	T	Sb01g047560	0	2679	1419	473	E	*	Glutamyl-tRNA synthetase	GLUTAMYL-TRNA SYNTHETASE	tRNA synthetases class I (E and Q), catalytic domain|tRNA synthetases class I (E and Q), anti-codon binding domain	similar to Putative uncharacterized protein	tRNA ligase activity,glutamate-tRNA ligase activity,ATP binding,cytoplasm,tRNA aminoacylation for protein translation,glutamyl-tRNA aminoacylation	Glutamate--tRNA ligase.;ATP + L-glutamate + tRNA(Glu) = AMP + diphosphate + L-glutamyl- tRNA(Glu).;\N;\N;Glutamate metabolism;Amino Acid Metabolism;METABOLIC,Glutamate--tRNA ligase.;ATP + L-glutamate + tRNA(Glu) = AMP + diphosphate + L-glutamyl- tRNA(Glu).;\N;\N;Porphyrin and chlorophyll metabolism;Metabolism of Cofactors and Vitamins;METABOLIC,Glutamate--tRNA ligase.;ATP + L-glutamate + tRNA(Glu…
chromosome_1	70676828	-	G	A	Sb01g047585	0	3110	889	297	Q	*	None	REVERSE TRANSCRIPTASES	None	similar to Putative uncharacterized protein	None	None
chromosome_1	70703548	-	G	A	Sb01g047615	0	277	277	93	Q	*	None	AMP DEPENDENT LIGASE/SYNTHETASE	None	similar to EST AU070346(S12172) corresponds to a region of the predicted gene	None	None
chromosome_1	70898883	+	G	A	Sb01g047760	1	2629	1818	606	W	*	None	REVERSE TRANSCRIPTASES	None	similar to Putative non-LTR retroelement reverse transcriptase	None	None
chromosome_1	70931651	-	A	T	Sb01g047810	1	670	636	212	Y	*	Uncharacterized conserved protein	PROBABLE MEMBRANE PROTEIN DUF221-RELATED	None	similar to Putative uncharacterized protein	None	None
chromosome_1	70943780	-	C	A	Sb01g047830	0	1264	354	118	G	*	Protein phosphatase 2C/pyruvate dehydrogenase (lipoamide) phosphatase	PROTEIN PHOSPHATASE 2C	Protein phosphatase 2C	similar to Putative uncharacterized protein	catalytic activity	[Pyruvate dehydrogenase (lipoamide)]-phosphatase.;[Pyruvate dehydrogenase (lipoamide)] phosphate + H(2)O = [pyruvate dehydrogenase (lipoamide)] + phosphate.;\N;\N;\N;\N;\N
chromosome_1	71067675	+	G	A	Sb01g047985	2	512	365	122	W	*	None	None	None	weakly similar to Putative uncharacterized protein	None	None
chromosome_1	71071185	-	G	A	Sb01g047990	0	370	253	85	Q	*	None	None	GRF zinc finger	similar to Putative uncharacterized protein OSJNBa0047D12.28	zinc ion binding	None
chromosome_1	71198757	-	G	T	Sb01g048160	1	740	420	140	Y	*	Serine/threonine protein kinase	SERINE-THREONINE PROTEIN KINASE, PLANT-TYPE	Protein kinase domain	similar to Protein kinase family protein, putative, expressed	protein kinase activity,protein serine/threonine kinase activity,protein-tyrosine kinase activity,ATP binding,protein amino acid phosphorylation	Phosphotransferases with an alcohol group as acceptor.;\N;\N;\N;Sphingoglycolipid metabolism;Metabolism of Complex Lipids;METABOLIC,Phosphotransferases with an alcohol group as acceptor.;\N;\N;\N;Benzoate degradation via CoA ligation;Biodegradation of Xenobiotics;METABOLIC,Phosphotransferases with an alcohol group as acceptor.;\N;\N;\N;Starch and sucrose metabolism;Metabolism of Complex Carbohydr…
chromosome_1	71267700	-	G	A	Sb01g048230	0	1431	198	66	Q	*	Ca2+-binding protein, EF-Hand protein superfamily	CALPAIN	EF hand|EF hand|EF hand|EF hand|EF hand	similar to Chromosome chr3 scaffold_8, whole genome shotgun sequence	calcium ion binding	None
chromosome_1	71329129	-	G	T	Sb01g048310	1	255	164	55	Y	*	Serine/threonine protein kinase	SERINE-THREONINE PROTEIN KINASE, PLANT-TYPE	Protein kinase domain|Protein tyrosine kinase	similar to Serine/threonine-protein kinase RLCKVII, putative, expressed	protein kinase activity,protein serine/threonine kinase activity,protein-tyrosine kinase activity,ATP binding,protein amino acid phosphorylation	Phosphotransferases with an alcohol group as acceptor.;\N;\N;\N;Sphingoglycolipid metabolism;Metabolism of Complex Lipids;METABOLIC,Phosphotransferases with an alcohol group as acceptor.;\N;\N;\N;Benzoate degradation via CoA ligation;Biodegradation of Xenobiotics;METABOLIC,Phosphotransferases with an alcohol group as acceptor.;\N;\N;\N;Starch and sucrose metabolism;Metabolism of Complex Carbohydr…
chromosome_1	71368193	+	G	T	Sb01g048330	0	1791	471	157	E	*	None	FAMILY NOT NAMED	Protein of unknown function, DUF265	similar to Chromosome chr4 scaffold_205, whole genome shotgun sequence	nucleotide binding,ATP binding,molecular function unknown,nucleoside-triphosphatase activity	None
chromosome_1	71498011	+	A	T	Sb01g048480	0	9966	2511	837	R	*	Exosomal 3'-5' exoribonuclease complex, subunit Rrp44/Dis3	RIBONUCLEASE	RNB-like protein	similar to Putative uncharacterized protein	nucleic acid binding,RNA binding,ribonuclease activity	Exoribonucleases producing 5'-phosphomonoesters.;\N;\N;\N;\N;\N;\N
chromosome_1	71499030	-	C	A	Sb01g048490	0	2434	939	313	G	*	Predicted membrane protein	None	Membrane transport protein	similar to Gb|AAD32907.1	molecular function unknown,integral to membrane	None
chromosome_1	71534278	+	C	T	Sb01g048550	0	256	256	86	Q	*	None	DNA TOPOISOMERASE/GYRASE	None	similar to DNA topoisomerase 2	DNA binding,DNA topoisomerase (ATP-hydrolyzing) activity,ATP binding,DNA metabolism,DNA topological change	DNA topoisomerase (ATP-hydrolysing).;ATP-dependent breakage, passage and rejoining of double-stranded DNA.;\N;Ataxia-telangiectasia; MIM:208900.;\N;\N;\N
chromosome_1	71534419	+	A	T	Sb01g048550	0	397	397	133	K	*	None	DNA TOPOISOMERASE/GYRASE	None	similar to DNA topoisomerase 2	DNA binding,DNA topoisomerase (ATP-hydrolyzing) activity,ATP binding,DNA metabolism,DNA topological change	DNA topoisomerase (ATP-hydrolysing).;ATP-dependent breakage, passage and rejoining of double-stranded DNA.;\N;Ataxia-telangiectasia; MIM:208900.;\N;\N;\N
chromosome_1	71553940	-	G	A	Sb01g048580	0	961	961	321	Q	*	None	REVERSE TRANSCRIPTASES	None	similar to Putative uncharacterized protein	None	None
chromosome_1	71558028	+	G	T	Sb01g048590	0	1624	435	145	E	*	DNA polymerase delta, regulatory subunit 55	DNA POLYMERASE DELTA SMALL SUBUNIT	DNA polymerase alpha/epsilon subunit B	similar to DNA polymerase delta small subunit	None	DNA-directed DNA polymerase.;N deoxynucleoside triphosphate = N diphosphate + {DNA}(N).;\N;\N;Purine metabolism;Nucleotide Metabolism;METABOLIC,DNA-directed DNA polymerase.;N deoxynucleoside triphosphate = N diphosphate + {DNA}(N).;\N;\N; DNA polymerase;REPLICATION AND REPAIR;REGULATORY,DNA-directed DNA polymerase.;N deoxynucleoside triphosphate = N diphosphate + {DNA}(N).;\N;\N;Pyrimidine metabo…
chromosome_1	71654056	+	A	T	Sb01g048700	0	4677	2180	727	R	*	None	None	FHA domain	similar to FHA domain containing protein, expressed	None	None
chromosome_1	71708161	+	C	A	Sb01g048740	2	914	167	56	S	*	None	None	None	similar to Putative uncharacterized protein	None	None
chromosome_1	71832768	+	G	A	Sb01g048850	1	9892	866	289	W	*	Riboflavin kinase	RIBOFLAVIN KINASE/FMN ADENYLYLTRANSFERASE	haloacid dehalogenase-like hydrolase|Riboflavin kinase	similar to HAD-superfamily hydrolase, subfamily IA, variant 3 containing protein, expressed	catalytic activity,metabolism,riboflavin kinase activity,riboflavin biosynthesis,hydrolase activity	Riboflavin kinase.;ATP + riboflavin = ADP + FMN.;\N;\N;Riboflavin metabolism;Metabolism of Cofactors and Vitamins;METABOLIC
chromosome_1	71843728	-	G	A	Sb01g048880	0	2423	759	253	R	*	None	None	Glycosyl hydrolases family 28	similar to Polygalacturonase, putative, expressed	polygalacturonase activity,carbohydrate metabolism	Polygalacturonase.;Random hydrolysis of 1,4-alpha-D-galactosiduronic linkages in pectate and other galacturonans.;\N;\N;Pentose and glucuronate interconversions;Carbohydrate Metabolism;METABOLIC,Polygalacturonase.;Random hydrolysis of 1,4-alpha-D-galactosiduronic linkages in pectate and other galacturonans.;\N;\N;Starch and sucrose metabolism;Metabolism of Complex Carbohydrates;METABOLIC
chromosome_1	72058220	-	C	T	Sb01g049060	2	821	821	274	W	*	None	None	None	similar to Putative uncharacterized protein	None	None
chromosome_1	72205113	+	C	T	Sb01g049190	0	3041	1132	378	Q	*	None	None	Remorin, C-terminal region	similar to Remorin, C-terminal region family protein, expressed	None	None
chromosome_1	72312651	-	G	A	Sb01g049305	0	955	564	188	Q	*	None	ATAXIN-10	None	similar to Putative uncharacterized protein	None	None
chromosome_1	72408223	-	C	A	Sb01g049400	0	94	94	32	E	*	None	None	AP2 domain	similar to AP2 domain containing protein, expressed	transcription factor activity,nucleus,regulation of transcription, DNA-dependent	None
chromosome_1	72466472	-	G	T	Sb01g049520	1	1085	403	135	C	*	Rhomboid family proteins	RHOMBOID-RELATED	Rhomboid family	similar to Membrane protein, putative, expressed	None	Serine endopeptidases.;\N;\N;\N;\N;\N;\N
chromosome_1	72565687	+	C	G	Sb01g049600	1	472	366	122	Y	*	None	PENTATRICOPEPTIDE REPEAT-CONTAINING PROTEIN	PPR repeat|PPR repeat|PPR repeat|PPR repeat|PPR repeat|PPR repeat|PPR repeat|PPR repeat|PPR repeat|PPR repeat	similar to Os03g0115300 protein	None	None
chromosome_1	72582773	+	T	A	Sb01g049620	1	2301	1238	413	Y	*	None	FUCOSE-1-PHOSPHATE GUANYLTRANSFERASE	L-fucokinase|GHMP kinases N terminal domain|GHMP kinases C terminal	similar to Putative uncharacterized protein	ATP binding,cytoplasm,metabolism,kinase activity,phosphorylation,phosphotransferase activity, alcohol group as acceptor	Fucokinase.;ATP + 6-deoxy-L-galactose = ADP + 6-deoxy-L-galactose 1-phosphate.;\N;\N;Fructose and mannose metabolism;Carbohydrate Metabolism;METABOLIC
chromosome_1	72641283	-	G	A	Sb01g049720	0	3376	1407	469	R	*	Kinesin (KAR3 subfamily)	KINESIN HEAVY CHAIN	Kinesin motor domain	similar to Putative uncharacterized protein OSJNBa0090O10.9	microtubule motor activity,ATP binding,microtubule associated complex,microtubule-based movement	None
chromosome_1	72794237	-	C	T	Sb01g049790	2	526	369	123	W	*	WD-repeat protein WDR6, WD repeat superfamily	WD REPEAT PROTEIN	WD domain, G-beta repeat|WD domain, G-beta repeat|WD domain, G-beta repeat|WD domain, G-beta repeat|WD domain, G-beta repeat|WD domain, G-beta repeat|WD domain, G-beta repeat|WD domain, G-beta repeat|WD domain, G-beta repeat	similar to Expressed protein	serine-type endopeptidase activity,proteolysis and peptidolysis	None
chromosome_1	72813198	+	A	T	Sb01g049820	0	4	4	2	K	*	None	None	None	Predicted protein	None	None
chromosome_1	72900828	-	C	T	Sb01g049905	2	2009	486	162	W	*	None	None	KIP1-like protein	similar to Putative uncharacterized protein	None	None
chromosome_1	72923502	-	G	A	Sb01g049940	0	647	559	187	R	*	None	None	Plant protein of unknown function (DUF827)	weakly similar to Putative uncharacterized protein	None	None
chromosome_1	72998457	-	G	T	Sb01g050040	1	942	638	213	Y	*	ATP-dependent RNA helicase	DEAD BOX ATP-DEPENDENT RNA HELICASE	DEAD/DEAH box helicase|Helicase conserved C-terminal domain	similar to DEAD-box ATP-dependent RNA helicase 50	nucleic acid binding,helicase activity,ATP binding,ATP-dependent helicase activity	In phosphorous-containing anhydrides.;\N;\N;\N;Starch and sucrose metabolism;Metabolism of Complex Carbohydrates;METABOLIC,In phosphorous-containing anhydrides.;\N;\N;\N;Folate biosynthesis;Metabolism of Cofactors and Vitamins;METABOLIC
chromosome_1	73012467	+	G	T	Sb01g050070	0	564	360	120	E	*	None	None	Glycosyl hydrolases family 16|Xyloglucan endo-transglycosylase (XET) C-terminus	similar to Glycosyl hydrolases family 16 protein, expressed	hydrolase activity, hydrolyzing O-glycosyl compounds,cell wall,carbohydrate metabolism,glucan metabolism,xyloglucan:xyloglucosyl transferase activity,apoplast	Xyloglucan:xyloglucosyl transferase.;Breaks a beta-(1->4) bond in the backbone of a xyloglucan and transfers the xyloglucanyl segment on to O-4 of the non-reducing terminal glucose residue of an acceptor, which can be a xyloglucan or an oligosaccharide of xyloglucan.;\N;\N;\N;\N;\N
chromosome_1	73070460	-	C	T	Sb01g050110	2	334	269	90	W	*	Acetylglucosaminyltransferase EXT1/exostosin 1	EXOSTOSIN (HEPARAN SULFATE GLYCOSYLTRANSFERASE)-RELATED	Exostosin family	similar to Exostosin family protein, putative, expressed	membrane	None
chromosome_1	73220370	-	C	A	Sb01g050240	0	372	304	102	E	*	None	None	Rare lipoprotein A (RlpA)-like double-psi beta-barrel|Pollen allergen	similar to Expansin-B11 precursor	extracellular region,sexual reproduction	None
chromosome_1	73295428	+	C	T	Sb01g050295	0	2295	1954	652	R	*	None	None	None	similar to Os03g0105800 protein	DNA binding,DNA methylation,N-methyltransferase activity	None
chromosome_1	73308256	-	G	A	Sb01g050310	0	687	480	160	R	*	Beta tubulin	TUBULIN	Tubulin/FtsZ family, GTPase domain|Tubulin/FtsZ family, C-terminal domain	similar to Tubulin beta-2/beta-3 chain	GTPase activity,structural molecule activity,GTP binding,microtubule,microtubule-based movement,protein complex,protein polymerization	None
chromosome_1	73319004	+	C	T	Sb01g050330	0	2868	1330	444	Q	*	Signal recognition particle receptor, alpha subunit	GTPASE CONTAINING FAMILY OF SIGNAL RECOGNITION PARTICLE PROTEINS	Signal recognition particle, alpha subunit, N-terminal|SRP54-type protein, helical bundle domain|SRP54-type protein, GTPase domain	similar to Putative uncharacterized protein	nucleotide binding,RNA binding,GTPase activity,signal recognition particle binding,GTP binding,signal recognition particle receptor complex,signal recognition particle (sensu Eukaryota),SRP-dependent cotranslational protein-membrane targeting,intracellular protein transport,nucleoside-triphosphatase activity	None
chromosome_1	73337040	-	G	A	Sb01g050336	0	2992	2667	889	Q	*	DNA helicase PIF1/RRM3	HELICASE-RELATED	Eukaryotic protein of unknown function (DUF889)	similar to DNA helicase homolog, putative	None	None
chromosome_1	73339895	-	G	C	Sb01g050336	1	137	137	46	Y	*	DNA helicase PIF1/RRM3	HELICASE-RELATED	Eukaryotic protein of unknown function (DUF889)	similar to DNA helicase homolog, putative	None	None
chromosome_1	73504595	-	C	T	Sb01g050442	2	38	38	13	W	*	None	None	None	similar to Malic enzyme	None	None
chromosome_1	73698277	-	G	T	Sb01g050620	2	5245	1974	658	S	*	Plasma membrane H+-transporting ATPase	CATION-TRANSPORTING ATPASE	Cation transporter/ATPase, N-terminus|E1-E2 ATPase|haloacid dehalogenase-like hydrolase	similar to Cation-transporting ATPase	structural constituent of ribosome,catalytic activity,ATP binding,intracellular,ribosome,protein biosynthesis,cation transport,metabolism,ATPase activity, coupled to transmembrane movement of ions, phosphorylative mechanism,proton transport,membrane,integral to membrane,hydrolase activity, acting on acid anhydrides, catalyzing transmembrane movement of substances,ATPase activity	Proton-exporting ATPase.;ATP + H(2)O + H(+)(In) = ADP + phosphate + H(+)(Out).;Magnesium.;\N;Oxidative phosphorylation;Energy Metabolism;METABOLIC
chromosome_1	73809988	+	C	A	Sb01g050660	1	4655	2352	784	Y	*	RNA Methylase, SpoU family	RNA METHYLASE-RELATED	SpoU rRNA Methylase family	similar to RNA methyltransferase, TrmH family protein, expressed	RNA binding,RNA processing,RNA methyltransferase activity	tRNA (guanosine-2'-O-)-methyltransferase.;S-adenosyl-L-methionine + tRNA = S-adenosyl-L-homocysteine + tRNA containing 2'-O-methylguanosine.;\N;\N;\N;\N;\N
chromosome_2	185489	-	A	T	Sb02g000300	2	2040	875	292	L	*	Multicopper oxidases	MULTI-COPPER OXIDASE	Multicopper oxidase|Multicopper oxidase	weakly similar to Laccase-14 precursor	copper ion binding	L-ascorbate oxidase.;2 L-ascorbate + O(2) = 2 dehydroascorbate + 2 H(2)O.;Copper.;\N;Ascorbate and aldarate metabolism;Carbohydrate Metabolism;METABOLIC
chromosome_2	347792	+	C	T	Sb02g000410	0	1068	997	333	Q	*	None	None	None	similar to Putative RIRE2 orf3	None	None
chromosome_2	487658	+	C	A	Sb02g000580	1	1188	1188	396	Y	*	None	None	Protein of unknown function, DUF594	weakly similar to Putative uncharacterized protein P0617C02.119	None	None
chromosome_2	501117	-	G	A	Sb02g000610	0	1343	1248	416	R	*	None	None	None	weakly similar to Putative uncharacterized protein	None	None
chromosome_2	501378	-	C	A	Sb02g000610	0	1082	1072	358	E	*	None	None	None	weakly similar to Putative uncharacterized protein	None	None
chromosome_2	511470	-	G	A	Sb02g000630	0	785	546	182	R	*	1,4-benzoquinone reductase-like; Trp repressor binding protein-like/protoplast-secreted protein	None	Flavodoxin	similar to Putative quinone oxidoreductase	FMN binding,oxidoreductase activity	None
chromosome_2	540954	+	C	A	Sb02g000660	2	3857	1902	634	S	*	HAT (Half-A-TPR) repeat-containing protein	HEPATOCELLULAR CARCINOMA-ASSOCIATED ANTIGEN 66	U3 small nucleolar RNA-associated protein 6	similar to Putative hepatocellular carcinoma-associated antigen 66	intracellular,RNA processing	None
chromosome_2	651784	-	G	A	Sb02g000800	0	531	480	160	Q	*	None	None	Protein of unknown function, DUF594	weakly similar to Putative uncharacterized protein	None	None
chromosome_2	673039	-	C	A	Sb02g000820	0	1204	1204	402	E	*	None	PENTATRICOPEPTIDE REPEAT-CONTAINING PROTEIN	Tetratricopeptide repeat|Tetratricopeptide repeat|PPR repeat|PPR repeat|Tetratricopeptide repeat|Tetratricopeptide repeat|PPR repeat|Tetratricopeptide repeat|PPR repeat|PPR repeat|Tetratricopeptide repeat|PPR repeat|PPR repeat	similar to Pentatricopeptide (PPR) repeat-containing protein-like	None	None
chromosome_2	743593	-	G	T	Sb02g000910	1	1305	1305	435	C	*	None	HEAT SHOCK PROTEIN 70KDA	Hsp70 protein	weakly similar to Putative uncharacterized protein	ATP binding	None
chromosome_2	761286	-	G	A	Sb02g000930	0	1620	1329	443	R	*	Flavin-containing monooxygenase	DIMETHYLANILINE MONOOXYGENASE	None	similar to Putative uncharacterized protein	monooxygenase activity,electron transport,metabolism,oxidoreductase activity	Dimethylaniline monooxygenase (N-oxide forming).;N,N-dimethylaniline + NADPH + O(2) = N,N-dimethylaniline N-oxide + NADP(+) + H(2)O.;FAD.;Trimethylaminuria; MIM:602079,;\N;\N;\N
chromosome_2	1092405	-	G	A	Sb02g001220	0	193	193	65	Q	*	None	None	None	weakly similar to Putative uncharacterized protein	ATP binding,apoptosis	None
chromosome_2	1122119	-	G	C	Sb02g001280	1	723	549	183	Y	*	None	None	None	similar to Putative uncharacterized protein	None	None
chromosome_2	1122258	-	C	T	Sb02g001280	2	584	410	137	W	*	None	None	None	similar to Putative uncharacterized protein	None	None
chromosome_2	1371587	+	C	T	Sb02g001550	0	394	394	132	Q	*	None	None	F-box domain	Predicted protein	None	None
chromosome_2	1371757	+	C	A	Sb02g001550	1	564	564	188	C	*	None	None	F-box domain	Predicted protein	None	None
chromosome_2	1514713	-	G	C	Sb02g001640	1	2096	1152	384	Y	*	None	None	F-box domain	Predicted protein	None	None
chromosome_2	1534077	+	T	G	Sb02g001650	1	555	555	185	Y	*	None	None	None	Predicted protein	None	None
chromosome_2	1771464	+	G	A	Sb02g001806	2	420	146	49	W	*	None	None	None	similar to Putative uncharacterized protein	transcription factor activity,nucleus,regulation of transcription, DNA-dependent	None
chromosome_2	1983780	+	G	A	Sb02g001945	2	47	47	16	W	*	None	FAMILY NOT NAMED	None	similar to Putative uncharacterized protein	None	None
chromosome_2	2112112	-	G	C	Sb02g002090	2	2455	2085	695	S	*	None	None	Glycosyl transferase family 2	similar to Putative uncharacterized protein	None	None
chromosome_2	2112308	-	T	A	Sb02g002090	0	2259	1889	630	K	*	None	None	Glycosyl transferase family 2	similar to Putative uncharacterized protein	None	None
chromosome_2	2200172	-	C	A	Sb02g002170	0	1117	1117	373	E	*	None	None	Protein of unknown function, DUF594	Predicted protein	None	None
chromosome_2	2218913	-	C	A	Sb02g002190	0	24	24	8	E	*	None	None	Protein of unknown function, DUF594	weakly similar to Putative uncharacterized protein	None	None
chromosome_2	2292322	-	G	C	Sb02g002220	2	1202	1193	398	S	*	Serine/threonine protein kinase	SERINE-THREONINE PROTEIN KINASE, PLANT-TYPE	Legume lectin domain|Protein kinase domain|Protein tyrosine kinase	similar to Os07g0130200 protein	protein kinase activity,protein serine/threonine kinase activity,protein-tyrosine kinase activity,ATP binding,protein amino acid phosphorylation	None
chromosome_2	2596841	-	G	T	Sb02g002450	1	675	675	225	Y	*	Serine/threonine protein kinase	SERINE-THREONINE PROTEIN KINASE, PLANT-TYPE	Leucine rich repeat N-terminal domain|Leucine Rich Repeat|Leucine Rich Repeat|Leucine Rich Repeat|Leucine Rich Repeat|Leucine Rich Repeat|Leucine Rich Repeat|Leucine Rich Repeat|Leucine Rich Repeat|Leucine Rich Repeat|Leucine Rich Repeat|Leucine Rich Repeat|Leucine Rich Repeat|Leucine Rich Repeat|Leucine Rich Repeat|Leucine Rich Repeat|Leucine Rich Repeat|Leucine Rich Repeat|Leucine Rich Repeat|L…	similar to Putative uncharacterized protein	catalytic activity,protein kinase activity,protein serine/threonine kinase activity,protein-tyrosine kinase activity,ATP binding,protein amino acid phosphorylation,proteolysis and peptidolysis,metallopeptidase activity,zinc ion binding,biosynthesis	Phosphotransferases with an alcohol group as acceptor.;\N;\N;\N;Sphingoglycolipid metabolism;Metabolism of Complex Lipids;METABOLIC,Phosphotransferases with an alcohol group as acceptor.;\N;\N;\N;Benzoate degradation via CoA ligation;Biodegradation of Xenobiotics;METABOLIC,Phosphotransferases with an alcohol group as acceptor.;\N;\N;\N;Starch and sucrose metabolism;Metabolism of Complex Carbohydr…
chromosome_2	2646631	+	G	A	Sb02g002530	1	3232	1600	534	W	*	Mitochondrial transcription termination factor, mTERF	FAMILY NOT NAMED	mTERF	similar to Putative uncharacterized protein	None	None
chromosome_2	3136811	-	G	A	Sb02g002970	0	6551	1778	593	Q	*	None	FAMILY NOT NAMED	D-ala D-ala ligase N-terminus|D-ala D-ala ligase N-terminus	similar to Putative uncharacterized protein P0034A04.101-1	cell wall,D-alanine-D-alanine ligase activity,peptidoglycan biosynthesis	None
chromosome_2	3279291	-	G	A	Sb02g003036	0	3674	3426	1142	R	*	E3 ubiquitin ligase interacting with arginine methyltransferase	REVERSE TRANSCRIPTASES	Zinc knuckle|Zinc knuckle|Endonuclease/Exonuclease/phosphatase family	Predicted protein	nucleic acid binding	None
chromosome_2	3279759	-	C	A	Sb02g003036	0	3206	2958	986	G	*	E3 ubiquitin ligase interacting with arginine methyltransferase	REVERSE TRANSCRIPTASES	Zinc knuckle|Zinc knuckle|Endonuclease/Exonuclease/phosphatase family	Predicted protein	nucleic acid binding	None
chromosome_2	3280325	-	C	T	Sb02g003036	2	2640	2640	880	W	*	E3 ubiquitin ligase interacting with arginine methyltransferase	REVERSE TRANSCRIPTASES	Zinc knuckle|Zinc knuckle|Endonuclease/Exonuclease/phosphatase family	Predicted protein	nucleic acid binding	None
chromosome_2	3281561	-	C	T	Sb02g003036	2	1404	1404	468	W	*	E3 ubiquitin ligase interacting with arginine methyltransferase	REVERSE TRANSCRIPTASES	Zinc knuckle|Zinc knuckle|Endonuclease/Exonuclease/phosphatase family	Predicted protein	nucleic acid binding	None
chromosome_2	3281948	-	C	T	Sb02g003036	2	1017	1017	339	W	*	E3 ubiquitin ligase interacting with arginine methyltransferase	REVERSE TRANSCRIPTASES	Zinc knuckle|Zinc knuckle|Endonuclease/Exonuclease/phosphatase family	Predicted protein	nucleic acid binding	None
chromosome_2	3348572	+	C	T	Sb02g003070	0	292	292	98	Q	*	None	None	TCP family transcription factor	similar to Os07g0152000 protein	None	None
chromosome_2	3357298	-	C	T	Sb02g003080	1	2736	2641	881	W	*	Serine/threonine protein kinase	SERINE-THREONINE PROTEIN KINASE, PLANT-TYPE	Leucine rich repeat N-terminal domain|Leucine Rich Repeat|Leucine Rich Repeat|Leucine Rich Repeat|Leucine Rich Repeat|Leucine Rich Repeat|Leucine Rich Repeat|Leucine Rich Repeat|Leucine Rich Repeat|Leucine Rich Repeat|Leucine Rich Repeat|Leucine Rich Repeat|Leucine Rich Repeat|Leucine Rich Repeat|Leucine Rich Repeat|Leucine Rich Repeat|Leucine Rich Repeat|Leucine Rich Repeat|Leucine Rich Repeat|L…	similar to Os07g0152200 protein	protein kinase activity,protein serine/threonine kinase activity,protein-tyrosine kinase activity,ATP binding,protein amino acid phosphorylation	Phosphotransferases with an alcohol group as acceptor.;\N;\N;\N;Sphingoglycolipid metabolism;Metabolism of Complex Lipids;METABOLIC,Phosphotransferases with an alcohol group as acceptor.;\N;\N;\N;Benzoate degradation via CoA ligation;Biodegradation of Xenobiotics;METABOLIC,Phosphotransferases with an alcohol group as acceptor.;\N;\N;\N;Starch and sucrose metabolism;Metabolism of Complex Carbohydr…
chromosome_2	3728130	-	T	A	Sb02g003260	0	6625	2699	900	K	*	Uncharacterized conserved protein	None	None	similar to Os07g0154400 protein	None	None
chromosome_2	3733999	-	G	T	Sb02g003260	2	756	720	240	S	*	Uncharacterized conserved protein	None	None	similar to Os07g0154400 protein	None	None
chromosome_2	3769577	+	G	T	Sb02g003300	0	2101	583	195	E	*	TatD-related DNase	TATD DNASE-RELATED	TatD related DNase	similar to Hydrolase, TatD family like protein	None	Endodeoxyribonucleases producing 5'-phosphomonoesters.;\N;\N;\N;\N;\N;\N
chromosome_2	3819410	+	C	T	Sb02g003360	0	318	159	53	R	*	Uncharacterized conserved protein, contains ML domain	None	ML domain	similar to Putative uncharacterized protein	None	None
chromosome_2	3880518	-	G	A	Sb02g003420	0	476	311	104	Q	*	None	None	None	weakly similar to Putative uncharacterized protein	None	None
chromosome_2	3929373	-	G	T	Sb02g003470	1	363	363	121	Y	*	Cytochrome P450 CYP2 subfamily	CYTOCHROME P450	Cytochrome P450	similar to Putative uncharacterized protein	monooxygenase activity,electron transport	Flavonoid 3'-monooxygenase.;A flavonoid + NADPH + O(2) = 3'-hydroxyflavonoid + NADP(+) + H(2)O.;\N;\N;Flavonoids, stilbene and lignin biosynthesis;Biosynthesis of Secondary Metabolites;METABOLIC
chromosome_2	4060609	-	G	A	Sb02g003640	0	2925	950	317	Q	*	Proteins containing the FAD binding domain	D-LACTATE DEHYDROGENASE	FAD binding domain|FAD linked oxidases, C-terminal domain	similar to Putative uncharacterized protein	electron transport	(R,R)-butanediol dehydrogenase.;(R,R)-butane-2,3-diol + NAD(+) = (R)-acetoin + NADH.;\N;\N;Butanoate metabolism;Carbohydrate Metabolism;METABOLIC
chromosome_2	4116610	-	G	A	Sb02g003680	0	3618	2100	700	R	*	Uncharacterized conserved protein HEN1/CORYMBOSA2	UNCHARACTERIZED	Double-stranded RNA binding motif|Methyltransferase domain	similar to Os07g0164000 protein	S-adenosylmethionine-dependent methyltransferase activity	None
chromosome_2	4149804	-	C	A	Sb02g003720	0	4867	3199	1067	E	*	Xanthine dehydrogenase	XANTHINE DEHYDROGENASE	2Fe-2S iron-sulfur cluster binding domain|[2Fe-2S] binding domain|FAD binding domain in molybdopterin dehydrogenase|CO dehydrogenase flavoprotein C-terminal domain|Aldehyde oxidase and xanthine dehydrogenase, a/b hammerhead domain|Aldehyde oxidase and xanthine dehydrogenase, molybdopterin binding domain	similar to Putative uncharacterized protein	protein kinase activity,electron transporter activity,iron ion binding,ATP binding,electron transport,protein amino acid phosphorylation,oxidoreductase activity	None
chromosome_2	4153815	-	G	A	Sb02g003720	0	856	738	246	Q	*	Xanthine dehydrogenase	XANTHINE DEHYDROGENASE	2Fe-2S iron-sulfur cluster binding domain|[2Fe-2S] binding domain|FAD binding domain in molybdopterin dehydrogenase|CO dehydrogenase flavoprotein C-terminal domain|Aldehyde oxidase and xanthine dehydrogenase, a/b hammerhead domain|Aldehyde oxidase and xanthine dehydrogenase, molybdopterin binding domain	similar to Putative uncharacterized protein	protein kinase activity,electron transporter activity,iron ion binding,ATP binding,electron transport,protein amino acid phosphorylation,oxidoreductase activity	None
chromosome_2	4165192	-	G	A	Sb02g003740	0	3469	2191	731	Q	*	None	SYNAPTOTAGMIN	C2 domain|C2 domain|Plant phosphoribosyltransferase C-terminal	similar to Os07g0165100 protein	None	None
chromosome_2	4186611	-	C	T	Sb02g003755	2	610	279	93	W	*	None	None	Protein of unknown function, DUF1544	weakly similar to Os05g0232800 protein	DNA binding	None
chromosome_2	4269903	+	C	T	Sb02g003850	0	271	270	90	R	*	U1 snRNP component	SMALL NUCLEAR RIBONUCLEOPROTEIN-ASSOCIATED PROTEIN	LSM domain	similar to Putative uncharacterized protein	nucleus,small nucleolar ribonucleoprotein complex,mRNA processing,ribonucleoprotein complex	None
chromosome_2	4296770	-	G	A	Sb02g003880	0	9993	2439	813	R	*	Speckle-type POZ protein SPOP and related proteins with TRAF, MATH and BTB/POZ domains	KELCH-RELATED PROTEINS	MATH domain|BTB/POZ domain	similar to Putative uncharacterized protein	protein binding	None
chromosome_2	4306644	-	G	A	Sb02g003880	0	119	540	180	Q	*	Speckle-type POZ protein SPOP and related proteins with TRAF, MATH and BTB/POZ domains	KELCH-RELATED PROTEINS	MATH domain|BTB/POZ domain	similar to Putative uncharacterized protein	protein binding	None
chromosome_2	4351975	+	T	A	Sb02g003910	1	4304	1441	481	C	*	None	None	Glycosyl hydrolases family 17|X8 domain	similar to Putative uncharacterized protein	hydrolase activity, hydrolyzing O-glycosyl compounds,carbohydrate metabolism	Glucan endo-1,3-beta-D-glucosidase.;Hydrolysis of 1,3-beta-D-glucosidic linkages in 1,3-beta-D-glucans.;\N;\N;Starch and sucrose metabolism;Metabolism of Complex Carbohydrates;METABOLIC
chromosome_2	4717993	+	C	A	Sb02g004160	1	495	495	165	Y	*	K+-channel ERG and related proteins, contain PAS/PAC sensor domain	VOLTAGE AND LIGAND GATED POTASSIUM CHANNEL	Ion transport protein|Ion channel|Cyclic nucleotide-binding domain|Ankyrin repeat|Ankyrin repeat|Ankyrin repeat|Ankyrin repeat	similar to Putative AKT1-like potassium channel	ion channel activity,voltage-gated potassium channel activity,cation channel activity,potassium channel activity,ion transport,cation transport,potassium ion transport,membrane	None
chromosome_2	4781611	-	T	A	Sb02g004230	0	1034	171	57	K	*	Inositol polyphosphate 5-phosphatase and related proteins	INOSITOL 5-PHOSPHATASE	Endonuclease/Exonuclease/phosphatase family	similar to Putative uncharacterized protein	inositol or phosphatidylinositol phosphatase activity	Inositol-1,4,5-trisphosphate 5-phosphatase.;D-myo-inositol 1,4,5-trisphosphate + H(2)O = D-myo-inositol 1,4-bisphosphate + phosphate.;\N;\N;Inositol phosphate metabolism;Metabolism of Complex Lipids;METABOLIC
chromosome_2	4781654	-	C	T	Sb02g004230	1	991	128	43	W	*	Inositol polyphosphate 5-phosphatase and related proteins	INOSITOL 5-PHOSPHATASE	Endonuclease/Exonuclease/phosphatase family	similar to Putative uncharacterized protein	inositol or phosphatidylinositol phosphatase activity	Inositol-1,4,5-trisphosphate 5-phosphatase.;D-myo-inositol 1,4,5-trisphosphate + H(2)O = D-myo-inositol 1,4-bisphosphate + phosphate.;\N;\N;Inositol phosphate metabolism;Metabolism of Complex Lipids;METABOLIC
chromosome_2	4798817	-	G	A	Sb02g004240	0	1046	942	314	R	*	None	LEUCINE-RICH REPEAT-CONTAINING PROTEIN	None	similar to Os10g0568600 protein	None	None
chromosome_2	4799847	-	T	A	Sb02g004240	0	16	16	6	K	*	None	LEUCINE-RICH REPEAT-CONTAINING PROTEIN	None	similar to Os10g0568600 protein	None	None
chromosome_2	4869515	+	C	T	Sb02g004300	0	2929	2176	726	R	*	None	DIMETHYLANILINE MONOOXYGENASE	None	similar to Putative uncharacterized protein	monooxygenase activity,electron transport	Dimethylaniline monooxygenase (N-oxide forming).;N,N-dimethylaniline + NADPH + O(2) = N,N-dimethylaniline N-oxide + NADP(+) + H(2)O.;FAD.;Trimethylaminuria; MIM:602079,;\N;\N;\N
chromosome_2	4902893	+	C	T	Sb02g004340	0	546	166	56	Q	*	DNA repair/transcription protein Mms19	DNA REPAIR/TRANSCRIPTION PROTEIN MET18/MMS19	None	similar to DNA repair/transcription protein Mms19-like protein	None	None
chromosome_2	4962966	-	G	A	Sb02g004400	0	67	67	23	Q	*	None	None	None	similar to ESTs AU057825	None	None
chromosome_2	4962972	-	G	A	Sb02g004400	0	61	61	21	Q	*	None	None	None	similar to ESTs AU057825	None	None
chromosome_2	5002783	+	C	T	Sb02g004420	0	100	100	34	Q	*	None	None	None	similar to Putative uncharacterized protein	None	None
chromosome_2	5017326	+	A	T	Sb02g004433	0	541	409	137	K	*	None	None	FAR1 family|SWIM zinc finger	Predicted protein	None	None
chromosome_2	5130083	-	G	A	Sb02g004480	0	1743	273	91	Q	*	None	None	None	similar to Putative uncharacterized protein	None	None
chromosome_2	5145341	+	C	T	Sb02g004500	0	537	267	89	Q	*	None	None	Cupin|Cupin domain	similar to Putative uncharacterized protein	regulation of transcription, DNA-dependent,nutrient reservoir activity	None
chromosome_2	5236970	+	C	A	Sb02g004550	2	2940	1143	381	S	*	Pyruvate kinase	PYRUVATE KINASE	Pyruvate kinase, barrel domain|Pyruvate kinase, alpha/beta domain	similar to Pyruvate kinase	pyruvate kinase activity,glycolysis	Pyruvate kinase.;ATP + pyruvate = ADP + phosphoenolpyruvate.;\N;Hemolytic anemia due to pyruvate kinase deficiency; MIM:266200.;Purine metabolism;Nucleotide Metabolism;METABOLIC,Pyruvate kinase.;ATP + pyruvate = ADP + phosphoenolpyruvate.;\N;Hemolytic anemia due to pyruvate kinase deficiency; MIM:266200.;Glycolysis / Gluconeogenesis;Carbohydrate Metabolism;METABOLIC,Pyruvate kinase.;ATP + pyruvat…
chromosome_2	5284310	-	G	T	Sb02g004623	1	1304	215	72	C	*	Guanylate-binding protein	GUANYLATE-BINDING PROTEIN	Guanylate-binding protein, N-terminal domain	similar to Os07g0181700 protein	GTPase activity,GTP binding,immune response	None
chromosome_2	5312909	+	C	T	Sb02g004640	0	1072	1072	358	Q	*	None	None	None	Predicted protein	None	None
chromosome_2	5673684	+	G	A	Sb02g004920	1	135	135	45	W	*	None	None	F-box domain	Predicted protein	None	None
chromosome_2	5698530	-	G	A	Sb02g004950	0	564	564	188	Q	*	None	None	F-box domain	Predicted protein	None	None
chromosome_2	5743567	-	G	T	Sb02g005000	1	1137	1137	379	Y	*	None	PENTATRICOPEPTIDE REPEAT-CONTAINING PROTEIN	PPR repeat|PPR repeat|PPR repeat|PPR repeat|PPR repeat|PPR repeat|PPR repeat|PPR repeat|PPR repeat|PPR repeat|PPR repeat|PPR repeat|PPR repeat	similar to Protein Rf1, mitochondrial precursor	None	None
chromosome_2	5791560	-	A	T	Sb02g005026	2	1581	1087	363	L	*	None	None	None	Predicted protein	None	None
chromosome_2	5827947	-	G	A	Sb02g005050	0	162	162	54	R	*	None	None	None	Predicted protein	None	1-phosphatidylinositol 4-kinase.;ATP + 1-phosphatidyl-1D-myo-inositol = ADP + 1-phosphatidyl-1D-myo- inositol 4-phosphate.;\N;\N;Inositol phosphate metabolism;Metabolism of Complex Lipids;METABOLIC
chromosome_2	5850072	-	T	A	Sb02g005070	0	2485	993	331	R	*	None	FAMILY NOT NAMED	None	similar to ATPase-like protein	nucleotide binding,ATP binding,nucleoside-triphosphatase activity	None
chromosome_2	5986123	-	T	A	Sb02g005140	0	1263	337	113	K	*	None	None	None	Predicted protein	None	None
chromosome_2	6045759	-	C	A	Sb02g005196	0	16	16	6	E	*	None	None	None	Predicted protein	None	None
chromosome_2	6057933	-	T	A	Sb02g005210	0	5030	3197	1066	R	*	Apoptotic ATPase	LEUCINE-RICH REPEAT-CONTAINING PROTEIN	NB-ARC domain|Leucine Rich Repeat|Leucine Rich Repeat|Leucine Rich Repeat|Leucine Rich Repeat|Leucine Rich Repeat|Leucine Rich Repeat|Leucine Rich Repeat|Leucine Rich Repeat|Leucine Rich Repeat|Leucine Rich Repeat	Predicted protein	ATP binding,apoptosis,defense response,defense response to pathogen	None
chromosome_2	6058195	-	C	T	Sb02g005210	1	4768	2935	979	W	*	Apoptotic ATPase	LEUCINE-RICH REPEAT-CONTAINING PROTEIN	NB-ARC domain|Leucine Rich Repeat|Leucine Rich Repeat|Leucine Rich Repeat|Leucine Rich Repeat|Leucine Rich Repeat|Leucine Rich Repeat|Leucine Rich Repeat|Leucine Rich Repeat|Leucine Rich Repeat|Leucine Rich Repeat	Predicted protein	ATP binding,apoptosis,defense response,defense response to pathogen	None
chromosome_2	6058328	-	C	T	Sb02g005210	2	4635	2802	934	W	*	Apoptotic ATPase	LEUCINE-RICH REPEAT-CONTAINING PROTEIN	NB-ARC domain|Leucine Rich Repeat|Leucine Rich Repeat|Leucine Rich Repeat|Leucine Rich Repeat|Leucine Rich Repeat|Leucine Rich Repeat|Leucine Rich Repeat|Leucine Rich Repeat|Leucine Rich Repeat|Leucine Rich Repeat	Predicted protein	ATP binding,apoptosis,defense response,defense response to pathogen	None
chromosome_2	6058758	-	T	A	Sb02g005210	0	4205	2372	791	K	*	Apoptotic ATPase	LEUCINE-RICH REPEAT-CONTAINING PROTEIN	NB-ARC domain|Leucine Rich Repeat|Leucine Rich Repeat|Leucine Rich Repeat|Leucine Rich Repeat|Leucine Rich Repeat|Leucine Rich Repeat|Leucine Rich Repeat|Leucine Rich Repeat|Leucine Rich Repeat|Leucine Rich Repeat	Predicted protein	ATP binding,apoptosis,defense response,defense response to pathogen	None
chromosome_2	6058774	-	G	T	Sb02g005210	1	4189	2356	786	C	*	Apoptotic ATPase	LEUCINE-RICH REPEAT-CONTAINING PROTEIN	NB-ARC domain|Leucine Rich Repeat|Leucine Rich Repeat|Leucine Rich Repeat|Leucine Rich Repeat|Leucine Rich Repeat|Leucine Rich Repeat|Leucine Rich Repeat|Leucine Rich Repeat|Leucine Rich Repeat|Leucine Rich Repeat	Predicted protein	ATP binding,apoptosis,defense response,defense response to pathogen	None
chromosome_2	6059478	-	G	A	Sb02g005210	0	3485	1652	551	Q	*	Apoptotic ATPase	LEUCINE-RICH REPEAT-CONTAINING PROTEIN	NB-ARC domain|Leucine Rich Repeat|Leucine Rich Repeat|Leucine Rich Repeat|Leucine Rich Repeat|Leucine Rich Repeat|Leucine Rich Repeat|Leucine Rich Repeat|Leucine Rich Repeat|Leucine Rich Repeat|Leucine Rich Repeat	Predicted protein	ATP binding,apoptosis,defense response,defense response to pathogen	None
chromosome_2	6124580	-	C	T	Sb02g005250	1	415	415	139	W	*	None	None	None	Predicted protein	None	None
chromosome_2	6174646	-	C	A	Sb02g005290	0	1274	406	136	G	*	None	None	None	Predicted protein	None	None
chromosome_2	6341651	+	A	T	Sb02g005400	0	4677	739	247	K	*	None	None	None	weakly similar to Transposon protein, putative, CACTA, En/Spm sub-class	None	None
chromosome_2	6343046	+	C	T	Sb02g005400	0	6072	1327	443	Q	*	None	None	None	weakly similar to Transposon protein, putative, CACTA, En/Spm sub-class	None	None
chromosome_2	6371135	+	C	T	Sb02g005405	0	2118	1456	486	Q	*	None	None	Whi5 like	weakly similar to Transposon protein, putative, CACTA, En/Spm sub-class	None	None
chromosome_2	6475625	-	G	A	Sb02g005460	0	3015	678	226	R	*	None	SUBTILISIN/KEXIN-RELATED SERINE PROTEASE	Subtilisin N-terminal Region|Subtilase family|PA domain	weakly similar to Chromosome chr6 scaffold_3, whole genome shotgun sequence	subtilase activity,proteolysis and peptidolysis,peptidase activity,protein self binding,negative regulation of enzyme activity	None
chromosome_2	6498999	+	G	A	Sb02g005500	2	1368	1241	414	W	*	Cytochrome P450 CYP2 subfamily	CYTOCHROME P450	Cytochrome P450	similar to Putative uncharacterized protein	monooxygenase activity,electron transport	Acting on paired donors, with incorporation or reduction of;\N;\N;\N;gamma-Hexachlorocyclohexane degradation;Biodegradation of Xenobiotics;METABOLIC,Acting on paired donors, with incorporation or reduction of;\N;\N;\N;Ascorbate and aldarate metabolism;Carbohydrate Metabolism;METABOLIC,Acting on paired donors, with incorporation or reduction of;\N;\N;\N;Flavonoids, stilbene and lignin biosynthesis…
chromosome_2	6532676	-	C	A	Sb02g005520	0	497	312	104	G	*	None	SUBTILISIN/KEXIN-RELATED SERINE PROTEASE	None	weakly similar to Chromosome chr6 scaffold_15, whole genome shotgun sequence	None	None
chromosome_2	6773961	-	C	T	Sb02g005716	1	93	93	31	W	*	None	None	None	Predicted protein	None	None
chromosome_2	6811005	-	G	A	Sb02g005750	0	1780	450	150	R	*	Prolyl 4-hydroxylase alpha subunit	PROLYL 4-HYDROXYLASE ALPHA SUBUNIT	2OG-Fe(II) oxygenase superfamily|ShK domain-like	similar to Os07g0194500 protein	oxidoreductase activity, acting on paired donors, with incorporation or reduction of molecular oxygen, 2-oxoglutarate as one donor, and incorporation of one atom each of oxygen into both donors,protein metabolism	Procollagen-proline,2-oxoglutarate-4-dioxygenase.;Procollagen L-proline + 2-oxoglutarate + O(2) = procollagen trans-4- hydroxy-L-proline + succinate + CO(2).;Iron; Ascorbate.;\N;Arginine and proline metabolism;Amino Acid Metabolism;METABOLIC
chromosome_2	6984891	-	G	T	Sb02g005850	1	1187	815	272	C	*	None	None	FAR1 family|SWIM zinc finger|Zinc knuckle	Predicted protein	nucleic acid binding	None
chromosome_2	7004727	-	G	C	Sb02g005860	2	411	411	137	S	*	None	None	TIR domain|FAR1 family	similar to TIR/P-loop/LRR disease resistance protein-like protein	transmembrane receptor activity,membrane	None
chromosome_2	7017384	-	G	A	Sb02g005862	0	1195	736	246	Q	*	None	NON-LTR RETROELEMENT REVERSE TRANSCRIPTASE RELATED	None	Predicted protein	None	None
chromosome_2	7017426	-	G	A	Sb02g005862	0	1153	694	232	Q	*	None	NON-LTR RETROELEMENT REVERSE TRANSCRIPTASE RELATED	None	Predicted protein	None	None
chromosome_2	7018400	-	C	T	Sb02g005862	2	179	179	60	W	*	None	NON-LTR RETROELEMENT REVERSE TRANSCRIPTASE RELATED	None	Predicted protein	None	None
chromosome_2	7024908	-	C	T	Sb02g005864	2	1596	812	271	W	*	None	REVERSE TRANSCRIPTASES	None	Predicted protein	None	None
chromosome_2	7025158	-	G	A	Sb02g005864	0	1346	562	188	Q	*	None	REVERSE TRANSCRIPTASES	None	Predicted protein	None	None
chromosome_2	7025287	-	G	A	Sb02g005864	0	1217	433	145	Q	*	None	REVERSE TRANSCRIPTASES	None	Predicted protein	None	None
chromosome_2	7026323	-	T	A	Sb02g005864	0	181	181	61	K	*	None	REVERSE TRANSCRIPTASES	None	Predicted protein	None	None
chromosome_2	7037267	-	C	T	Sb02g005867	2	1664	1493	498	W	*	None	REVERSE TRANSCRIPTASES	None	weakly similar to H0215A08.3 protein	None	None
chromosome_2	7171707	-	G	A	Sb02g005970	0	345	345	115	R	*	None	REVERSE TRANSCRIPTASES	None	similar to Putative uncharacterized protein	None	None
chromosome_2	7253777	+	C	A	Sb02g006000	1	15874	4750	1584	C	*	rRNA processing protein Rrp5	PROGRAMMED CELL DEATH PROTEIN 11 (PRE-RRNA PROCESSING PROTEIN RRP5)	S1 RNA binding domain|S1 RNA binding domain|S1 RNA binding domain|S1 RNA binding domain|S1 RNA binding domain|S1 RNA binding domain|S1 RNA binding domain|S1 RNA binding domain	similar to Putative uncharacterized protein	nucleic acid binding,RNA binding,structural constituent of ribosome,intracellular,ribosome,RNA processing,protein biosynthesis	Polyribonucleotide nucleotidyltransferase.;{RNA}(N+1) + phosphate = {RNA}(N) + a nucleoside diphosphate.;\N;\N;Purine metabolism;Nucleotide Metabolism;METABOLIC,Polyribonucleotide nucleotidyltransferase.;{RNA}(N+1) + phosphate = {RNA}(N) + a nucleoside diphosphate.;\N;\N;Pyrimidine metabolism;Nucleotide Metabolism;METABOLIC
chromosome_2	7340668	-	A	C	Sb02g006050	1	675	675	225	Y	*	Apoptotic ATPase	None	NB-ARC domain|Leucine Rich Repeat|Leucine Rich Repeat|Leucine Rich Repeat	Predicted protein	ATP binding,apoptosis,defense response,defense response to pathogen	None
chromosome_2	7396947	+	C	A	Sb02g006110	1	772	398	133	C	*	None	None	None	similar to Putative uncharacterized protein	None	None
chromosome_2	7603506	-	C	T	Sb02g006147	2	2399	2022	674	W	*	None	REVERSE TRANSCRIPTASES	Endonuclease/Exonuclease/phosphatase family	Predicted protein	None	None
chromosome_2	7714523	-	C	A	Sb02g006190	0	2594	2496	832	G	*	Serine/threonine protein kinase	SERINE-THREONINE PROTEIN KINASE, PLANT-TYPE	Leucine rich repeat N-terminal domain|Leucine Rich Repeat|Leucine Rich Repeat|Leucine Rich Repeat|Leucine Rich Repeat|Leucine Rich Repeat|Leucine Rich Repeat|Leucine Rich Repeat|Leucine Rich Repeat|Leucine Rich Repeat|Leucine Rich Repeat|Leucine Rich Repeat|Leucine Rich Repeat|Leucine Rich Repeat|Leucine Rich Repeat|Leucine Rich Repeat|Leucine Rich Repeat|Leucine Rich Repeat|Protein kinase domain	similar to Os07g0207100 protein	protein kinase activity,protein serine/threonine kinase activity,protein-tyrosine kinase activity,ATP binding,protein amino acid phosphorylation	Phosphotransferases with an alcohol group as acceptor.;\N;\N;\N;Sphingoglycolipid metabolism;Metabolism of Complex Lipids;METABOLIC,Phosphotransferases with an alcohol group as acceptor.;\N;\N;\N;Benzoate degradation via CoA ligation;Biodegradation of Xenobiotics;METABOLIC,Phosphotransferases with an alcohol group as acceptor.;\N;\N;\N;Starch and sucrose metabolism;Metabolism of Complex Carbohydr…
chromosome_2	7762558	+	C	A	Sb02g006230	1	435	387	129	Y	*	Serine/threonine protein kinase	SERINE-THREONINE PROTEIN KINASE, PLANT-TYPE	Leucine rich repeat N-terminal domain|Leucine Rich Repeat|Leucine Rich Repeat|Leucine Rich Repeat|Leucine Rich Repeat|Leucine Rich Repeat|Leucine Rich Repeat|Leucine Rich Repeat|Leucine Rich Repeat|Leucine Rich Repeat|Leucine Rich Repeat|Leucine Rich Repeat|Leucine Rich Repeat|Leucine Rich Repeat|Leucine Rich Repeat|Leucine Rich Repeat|Leucine Rich Repeat|Leucine Rich Repeat|Leucine Rich Repeat|L…	weakly similar to Os01g0153000 protein	protein kinase activity,protein serine/threonine kinase activity,protein-tyrosine kinase activity,ATP binding,protein amino acid phosphorylation	Phosphotransferases with an alcohol group as acceptor.;\N;\N;\N;Sphingoglycolipid metabolism;Metabolism of Complex Lipids;METABOLIC,Phosphotransferases with an alcohol group as acceptor.;\N;\N;\N;Benzoate degradation via CoA ligation;Biodegradation of Xenobiotics;METABOLIC,Phosphotransferases with an alcohol group as acceptor.;\N;\N;\N;Starch and sucrose metabolism;Metabolism of Complex Carbohydr…
chromosome_2	7780397	+	T	A	Sb02g006240	2	3011	2891	964	L	*	Serine/threonine protein kinase	SERINE-THREONINE PROTEIN KINASE, PLANT-TYPE	Leucine rich repeat N-terminal domain|Leucine Rich Repeat|Leucine Rich Repeat|Leucine Rich Repeat|Leucine Rich Repeat|Leucine Rich Repeat|Leucine Rich Repeat|Leucine Rich Repeat|Leucine Rich Repeat|Leucine Rich Repeat|Leucine Rich Repeat|Leucine Rich Repeat|Leucine Rich Repeat|Leucine Rich Repeat|Leucine Rich Repeat|Leucine Rich Repeat|Leucine Rich Repeat|Leucine Rich Repeat|Leucine Rich Repeat|L…	weakly similar to Os01g0152600 protein	protein kinase activity,protein serine/threonine kinase activity,protein-tyrosine kinase activity,ATP binding,protein amino acid phosphorylation	Phosphotransferases with an alcohol group as acceptor.;\N;\N;\N;Sphingoglycolipid metabolism;Metabolism of Complex Lipids;METABOLIC,Phosphotransferases with an alcohol group as acceptor.;\N;\N;\N;Benzoate degradation via CoA ligation;Biodegradation of Xenobiotics;METABOLIC,Phosphotransferases with an alcohol group as acceptor.;\N;\N;\N;Starch and sucrose metabolism;Metabolism of Complex Carbohydr…
chromosome_2	7845965	-	A	T	Sb02g006290	2	2629	1350	450	L	*	None	SUBFAMILY NOT NAMED	Cellulose synthase	similar to Cellulose synthase-9	membrane,cellulose synthase (UDP-forming) activity,cellulose biosynthesis	None
chromosome_2	7973585	+	C	T	Sb02g006360	0	7481	3825	1275	R	*	None	None	None	similar to Putative uncharacterized protein	None	None
chromosome_2	8052510	-	C	A	Sb02g006420	0	528	528	176	G	*	None	UNCHARACTERIZED	Protein of unknown function (DUF630)|Protein of unknown function (DUF632)	similar to Putative bZIP protein	None	None
chromosome_2	8094531	-	G	A	Sb02g006460	0	2789	2503	835	Q	*	None	None	None	Predicted protein	None	Acid--D-amino-acid ligases (peptide synthases).;\N;\N;\N;Tryptophan metabolism;Amino Acid Metabolism;METABOLIC,Acid--D-amino-acid ligases (peptide synthases).;\N;\N;\N;Ubiquinone biosynthesis;Metabolism of Cofactors and Vitamins;METABOLIC
chromosome_2	8095980	-	C	T	Sb02g006460	2	1340	1146	382	W	*	None	None	None	Predicted protein	None	Acid--D-amino-acid ligases (peptide synthases).;\N;\N;\N;Tryptophan metabolism;Amino Acid Metabolism;METABOLIC,Acid--D-amino-acid ligases (peptide synthases).;\N;\N;\N;Ubiquinone biosynthesis;Metabolism of Cofactors and Vitamins;METABOLIC
chromosome_2	8438398	+	G	A	Sb02g006658	2	257	257	86	W	*	None	NON-LTR RETROELEMENT REVERSE TRANSCRIPTASE RELATED	None	Predicted protein	None	None
chromosome_2	8539583	-	G	A	Sb02g006715	0	1240	1144	382	R	*	None	None	None	Predicted protein	None	None
chromosome_2	8556264	+	C	T	Sb02g006720	0	157	157	53	Q	*	None	None	None	similar to Transposon protein, putative, CACTA, En/Spm sub-class	None	None
chromosome_2	8556468	+	C	T	Sb02g006720	0	361	361	121	R	*	None	None	None	similar to Transposon protein, putative, CACTA, En/Spm sub-class	None	None
chromosome_2	8700291	-	G	A	Sb02g006820	0	63	63	21	Q	*	None	None	None	similar to Putative uncharacterized protein	None	None
chromosome_2	8705770	-	C	A	Sb02g006840	0	20883	2721	907	G	*	Apoptotic ATPase	None	NB-ARC domain	similar to NB-ARC domain containing protein, expressed	ATP binding,apoptosis,defense response,defense response to pathogen	None
chromosome_2	8705949	-	G	T	Sb02g006840	2	20704	2542	848	S	*	Apoptotic ATPase	None	NB-ARC domain	similar to NB-ARC domain containing protein, expressed	ATP binding,apoptosis,defense response,defense response to pathogen	None
chromosome_2	8706038	-	G	C	Sb02g006840	1	20615	2453	818	Y	*	Apoptotic ATPase	None	NB-ARC domain	similar to NB-ARC domain containing protein, expressed	ATP binding,apoptosis,defense response,defense response to pathogen	None
chromosome_2	8706042	-	G	C	Sb02g006840	2	20611	2449	817	S	*	Apoptotic ATPase	None	NB-ARC domain	similar to NB-ARC domain containing protein, expressed	ATP binding,apoptosis,defense response,defense response to pathogen	None
chromosome_2	8706830	-	C	T	Sb02g006840	1	19823	1661	554	W	*	Apoptotic ATPase	None	NB-ARC domain	similar to NB-ARC domain containing protein, expressed	ATP binding,apoptosis,defense response,defense response to pathogen	None
chromosome_2	8823130	+	C	T	Sb02g006886	0	154	154	52	Q	*	None	None	None	Predicted protein	None	None
chromosome_2	8898477	-	G	T	Sb02g006930	2	2574	1046	349	S	*	Amino acid transporters	AMINO ACID TRANSPORTER	Transmembrane amino acid transporter protein	similar to Os07g0231400 protein	amino acid-polyamine transporter activity,amino acid transport,membrane	None
chromosome_2	8908775	+	G	T	Sb02g006940	0	753	595	199	E	*	Cation transport ATPase	CATION-TRANSPORTING ATPASE	E1-E2 ATPase|haloacid dehalogenase-like hydrolase	similar to Cation-transporting ATPase	catalytic activity,ATP binding,cation transport,metabolism,ATPase activity, coupled to transmembrane movement of ions, phosphorylative mechanism,membrane,integral to membrane,hydrolase activity, acting on acid anhydrides, in phosphorus-containing anhydrides,hydrolase activity, acting on acid anhydrides, catalyzing transmembrane movement of substances,metal ion transport,metal ion binding,metal io…	None
chromosome_2	8945404	-	G	A	Sb02g006990	0	1531	2452	818	R	*	None	None	F-box domain	Predicted protein	None	None
chromosome_2	8946161	-	G	T	Sb02g006990	1	774	1695	565	C	*	None	None	F-box domain	Predicted protein	None	None
chromosome_2	8946166	-	G	A	Sb02g006990	0	769	1690	564	Q	*	None	None	F-box domain	Predicted protein	None	None
chromosome_2	8953130	+	G	A	Sb02g007000	1	459	459	153	W	*	None	None	AP2 domain|AP2 domain	similar to Putative indeterminate spikelet 1	transcription factor activity,nucleus,regulation of transcription, DNA-dependent	None
chromosome_2	8953321	+	G	A	Sb02g007000	2	650	650	217	W	*	None	None	AP2 domain|AP2 domain	similar to Putative indeterminate spikelet 1	transcription factor activity,nucleus,regulation of transcription, DNA-dependent	None
chromosome_2	9067603	+	C	T	Sb02g007075	0	172	172	58	Q	*	None	WD40 REPEAT PROTEIN	None	similar to Putative small nuclear ribonucleoprotein	None	None
chromosome_2	9067678	+	G	T	Sb02g007075	0	247	247	83	E	*	None	WD40 REPEAT PROTEIN	None	similar to Putative small nuclear ribonucleoprotein	None	None
chromosome_2	9094631	-	C	T	Sb02g007100	1	1712	1375	459	W	*	UDP-glucuronosyl and UDP-glucosyl transferase	GLUCOSYL/GLUCURONOSYL TRANSFERASES	UDP-glucoronosyl and UDP-glucosyl transferase	similar to Putative uncharacterized protein	metabolism,transferase activity, transferring hexosyl groups	Limonoid glucosyltransferase.;UDP-glucose + limonin = glucosyl-limonin + UDP.;\N;\N;\N;\N;\N
chromosome_2	9118783	+	C	T	Sb02g007130	0	1260	625	209	Q	*	None	None	None	Predicted protein	None	None
chromosome_2	9136033	-	C	T	Sb02g007140	1	1322	1203	401	W	*	UDP-glucuronosyl and UDP-glucosyl transferase	GLUCOSYL/GLUCURONOSYL TRANSFERASES	UDP-glucoronosyl and UDP-glucosyl transferase	similar to Putative uncharacterized protein	metabolism,transferase activity, transferring hexosyl groups	Limonoid glucosyltransferase.;UDP-glucose + limonin = glucosyl-limonin + UDP.;\N;\N;\N;\N;\N
chromosome_2	9203278	-	G	A	Sb02g007175	0	106	106	36	Q	*	None	30S RIBOSOMAL PROTEIN S12 FAMILY MEMBER	None	similar to Chloroplast 30S ribosomal protein S12	nucleic acid binding,structural constituent of ribosome,protein biosynthesis,small ribosomal subunit	None
chromosome_2	9208064	-	G	A	Sb02g007180	0	1042	933	311	R	*	None	None	None	similar to Large secreted protein, putative, expressed	None	None
chromosome_2	9221255	-	C	A	Sb02g007190	0	2330	1318	440	E	*	None	HELICASE-RELATED	Eukaryotic protein of unknown function (DUF889)	weakly similar to Os01g0175300 protein	nucleic acid binding	None
chromosome_2	9255510	-	C	A	Sb02g007215	0	319	319	107	E	*	None	WD40 REPEAT PROTEIN	None	similar to Putative small nuclear ribonucleoprotein	None	None
chromosome_2	9473297	-	G	A	Sb02g007480	0	1191	925	309	Q	*	Calreticulin	CALRETICULIN AND CALNEXIN	Calreticulin family	similar to Calreticulin precursor	calcium ion binding	None
chromosome_2	9473496	-	G	A	Sb02g007480	0	992	416	139	R	*	Calreticulin	CALRETICULIN AND CALNEXIN	Calreticulin family	similar to Calreticulin precursor	calcium ion binding	None
chromosome_2	9481366	+	C	T	Sb02g007500	0	1299	856	286	Q	*	None	REVERSE TRANSCRIPTASES	None	Predicted protein	None	None
chromosome_2	9482403	+	A	T	Sb02g007500	0	2336	1240	414	K	*	None	REVERSE TRANSCRIPTASES	None	Predicted protein	None	None
chromosome_2	9482635	+	G	A	Sb02g007500	2	2568	1424	475	W	*	None	REVERSE TRANSCRIPTASES	None	Predicted protein	None	None
chromosome_2	9560551	+	C	G	Sb02g007580	2	1013	858	286	S	*	Soluble epoxide hydrolase	ALPHA/BETA HYDROLASE RELATED	alpha/beta hydrolase fold	similar to Epoxide hydrolase	catalytic activity,aromatic compound metabolism,hydrolase activity	None
chromosome_2	9608693	-	G	A	Sb02g007610	0	378	378	126	R	*	None	PENTATRICOPEPTIDE REPEAT-CONTAINING PROTEIN	PPR repeat|PPR repeat|PPR repeat|PPR repeat|PPR repeat|PPR repeat|PPR repeat|PPR repeat|PPR repeat|PPR repeat|PPR repeat|PPR repeat|PPR repeat|PPR repeat|PPR repeat|PPR repeat|PPR repeat|PPR repeat|PPR repeat|PPR repeat	similar to Putative pentatricopeptide (PPR) repeat-containing protein	None	None
chromosome_2	9613207	-	C	A	Sb02g007615	0	295	177	59	E	*	None	None	MuDR family transposase	weakly similar to Os03g0398400 protein	extracellular region,immune response,chemokine activity	None
chromosome_2	9624623	-	A	T	Sb02g007630	1	1897	724	242	C	*	WD40 repeat protein	WD REPEAT CONTAINING PROTEIN	WD domain, G-beta repeat|WD domain, G-beta repeat|WD domain, G-beta repeat|WD domain, G-beta repeat|WD domain, G-beta repeat|WD domain, G-beta repeat|WD domain, G-beta repeat	similar to Putative WD40 protein Ciao1	None	2-acetyl-1-alkylglycerophosphocholine esterase.;2-acetyl-1-alkyl-sn-glycero-3-phosphocholine + H(2)O = 1-alkyl-sn- glycero-3-phosphocholine + acetate.;\N;\N;Glycerolipid metabolism;Metabolism of Complex Lipids;METABOLIC
chromosome_2	9652302	-	C	A	Sb02g007675	0	97	97	33	E	*	None	None	None	similar to Putative uncharacterized protein At2g19370	None	None
chromosome_2	9686802	+	C	A	Sb02g007720	2	1970	866	289	S	*	None	PROTEASE M20-RELATED	Peptidase family M20/M25/M40|Peptidase dimerisation domain	similar to Putative IAA amidohydrolase	proteolysis and peptidolysis,metallopeptidase activity	In linear amides.;\N;\N;\N;Nicotinate and nicotinamide metabolism;Metabolism of Cofactors and Vitamins;METABOLIC,In linear amides.;\N;\N;\N;Pantothenate and CoA biosynthesis;Metabolism of Cofactors and Vitamins;METABOLIC,In linear amides.;\N;\N;\N;Arginine and proline metabolism;Amino Acid Metabolism;METABOLIC,In linear amides.;\N;\N;\N;Lipopolysaccharide biosynthesis;Metabolism of Complex Carboh…
chromosome_2	9788882	+	C	T	Sb02g007790	0	869	211	71	R	*	None	KINESIN - RELATED	None	weakly similar to Putative uncharacterized protein	None	None
chromosome_2	9861898	-	C	T	Sb02g007830	1	293	95	32	W	*	None	None	None	similar to Putative uncharacterized protein	None	None
chromosome_2	9969500	-	C	A	Sb02g007922	0	48	48	16	G	*	None	None	Transposase family tnp2	similar to TNP2-like protein	None	None
chromosome_2	9969512	-	G	A	Sb02g007922	0	36	36	12	Q	*	None	None	Transposase family tnp2	similar to TNP2-like protein	None	None
chromosome_2	10165226	-	G	C	Sb02g007950	2	4067	1675	559	S	*	None	None	None	Predicted protein	None	None
chromosome_2	10166233	-	G	A	Sb02g007950	0	3060	1260	420	Q	*	None	None	None	Predicted protein	None	None
chromosome_2	10166566	-	G	A	Sb02g007950	0	2727	927	309	R	*	None	None	None	Predicted protein	None	None
chromosome_2	10166593	-	C	A	Sb02g007950	0	2700	900	300	E	*	None	None	None	Predicted protein	None	None
chromosome_2	10250015	+	C	A	Sb02g007960	1	366	366	122	Y	*	None	None	None	Predicted protein	None	None
chromosome_2	10317267	-	G	T	Sb02g008010	2	1530	681	227	S	*	None	None	None	Predicted protein	None	None
chromosome_2	10381769	-	G	A	Sb02g008053	0	625	625	209	Q	*	None	None	Domain of unknown function (DUF1719)	weakly similar to Putative uncharacterized protein	None	None
chromosome_2	10428234	-	G	A	Sb02g008060	0	162	162	54	R	*	None	None	Domain of unknown function (DUF1719)	similar to Putative uncharacterized protein	None	None
chromosome_2	10498495	+	C	T	Sb02g008075	0	136	136	46	Q	*	None	None	None	Predicted protein	None	None
chromosome_2	10499344	+	G	A	Sb02g008075	2	985	527	176	W	*	None	None	None	Predicted protein	None	None
chromosome_2	10591263	+	C	T	Sb02g008116	0	386	385	129	Q	*	None	None	None	similar to Putative uncharacterized protein	None	None
chromosome_2	10797913	+	C	G	Sb02g008150	2	413	413	138	S	*	None	None	None	weakly similar to Putative transposon protein	None	None
chromosome_2	10974755	-	G	A	Sb02g008271	0	3845	2858	953	R	*	None	REVERSE TRANSCRIPTASES	None	weakly similar to Putative non-LTR retroelement reverse transcriptase	None	None
chromosome_2	10977054	-	G	A	Sb02g008271	0	1546	1261	421	Q	*	None	REVERSE TRANSCRIPTASES	None	weakly similar to Putative non-LTR retroelement reverse transcriptase	None	None
chromosome_2	10977897	-	G	T	Sb02g008271	2	703	703	235	S	*	None	REVERSE TRANSCRIPTASES	None	weakly similar to Putative non-LTR retroelement reverse transcriptase	None	None
chromosome_2	11018581	-	G	A	Sb02g008350	0	405	405	135	Q	*	None	None	Domain of unknown function (DUF1719)	weakly similar to Putative uncharacterized protein	None	None
chromosome_2	11118669	-	G	A	Sb02g008380	0	645	645	215	R	*	None	None	F-box domain	weakly similar to Putative uncharacterized protein P0022B05.123	None	None
chromosome_2	11119182	-	G	A	Sb02g008380	0	132	132	44	R	*	None	None	F-box domain	weakly similar to Putative uncharacterized protein P0022B05.123	None	None
chromosome_2	11147249	-	G	C	Sb02g008410	2	547	459	153	S	*	None	None	FBD	Predicted protein	None	None
chromosome_2	11147598	-	G	A	Sb02g008410	0	198	198	66	Q	*	None	None	FBD	Predicted protein	None	None
chromosome_2	11203542	-	G	C	Sb02g008418	1	885	885	295	Y	*	None	None	Transposase family tnp2	similar to Putative transposase protein	None	None
chromosome_2	11204112	-	G	C	Sb02g008418	1	315	315	105	Y	*	None	None	Transposase family tnp2	similar to Putative transposase protein	None	None
chromosome_2	11224821	-	G	A	Sb02g008430	0	239	239	80	Q	*	None	NUCLEOPORIN-RELATED	Dirigent-like protein|Jacalin-like lectin domain	weakly similar to Jasmonate-induced protein, putative, expressed	response to pathogenic fungi	None
chromosome_2	11482635	+	C	T	Sb02g008650	0	589	481	161	Q	*	None	NUCLEAR PROTEIN 95	YDG/SRA domain|Zinc finger, C3HC4 type (RING finger)	similar to Putative uncharacterized protein P0036D10.17	ubiquitin ligase complex,ubiquitin-protein ligase activity,zinc ion binding,protein ubiquitination	None
chromosome_2	11766017	-	G	A	Sb02g008695	0	223	223	75	Q	*	None	None	None	similar to Putative uncharacterized protein	None	None
chromosome_2	11788747	+	G	A	Sb02g008700	2	317	317	106	W	*	None	N-TERMINAL ACETYLTRANSFERASE	Acetyltransferase (GNAT) family	similar to Os07g0264800 protein	N-acetyltransferase activity	None
chromosome_2	11834701	+	C	T	Sb02g008712	0	511	511	171	Q	*	None	REVERSE TRANSCRIPTASES	None	weakly similar to Putative uncharacterized protein	None	None
chromosome_2	11977526	-	A	T	Sb02g008730	2	2760	692	231	L	*	None	NON-LTR RETROELEMENT REVERSE TRANSCRIPTASE RELATED	None	weakly similar to Putative uncharacterized protein	None	None
chromosome_2	11977608	-	C	A	Sb02g008730	0	2678	610	204	E	*	None	NON-LTR RETROELEMENT REVERSE TRANSCRIPTASE RELATED	None	weakly similar to Putative uncharacterized protein	None	None
chromosome_2	12051787	-	G	T	Sb02g008780	1	27	27	9	C	*	None	None	None	weakly similar to Transposon protein, putative, CACTA, En/Spm sub-class	None	None
chromosome_2	12424246	+	C	T	Sb02g008880	0	1624	1624	542	Q	*	Apoptotic ATPase	LEUCINE-RICH REPEAT-CONTAINING PROTEIN	NB-ARC domain|Leucine Rich Repeat|Leucine Rich Repeat|Leucine Rich Repeat|Leucine Rich Repeat|Leucine Rich Repeat|Leucine Rich Repeat|WRKY DNA -binding domain	similar to Os07g0273700 protein	DNA binding,ATP binding,apoptosis,defense response,defense response to pathogen	None
chromosome_2	12468030	-	C	A	Sb02g008910	0	145	145	49	E	*	None	None	None	weakly similar to Putative uncharacterized protein	None	None
chromosome_2	12711456	+	G	T	Sb02g009040	0	334	334	112	E	*	None	None	None	weakly similar to Putative uncharacterized protein	None	None
chromosome_2	12721737	+	C	A	Sb02g009050	1	309	309	103	Y	*	None	None	None	Predicted protein	None	None
chromosome_2	12723374	+	G	A	Sb02g009050	2	1946	1658	553	W	*	None	None	None	Predicted protein	None	None
chromosome_2	12723375	+	G	A	Sb02g009050	1	1947	1659	553	W	*	None	None	None	Predicted protein	None	None
chromosome_2	12733912	+	C	G	Sb02g009060	2	1605	1244	415	S	*	None	None	F-box domain|Leucine Rich Repeat	weakly similar to Putative uncharacterized protein	None	None
chromosome_2	12799798	-	A	T	Sb02g009100	1	2036	1018	340	Y	*	Serine/threonine protein kinase	SERINE-THREONINE PROTEIN KINASE, PLANT-TYPE	Protein kinase domain|Protein tyrosine kinase	weakly similar to Putative wall-associated serine/threonine kinase	protein kinase activity,protein serine/threonine kinase activity,protein-tyrosine kinase activity,ATP binding,protein amino acid phosphorylation	None
chromosome_2	12856469	+	C	T	Sb02g009120	0	9799	3784	1262	Q	*	Xanthine dehydrogenase	XANTHINE DEHYDROGENASE	2Fe-2S iron-sulfur cluster binding domain|[2Fe-2S] binding domain|FAD binding domain in molybdopterin dehydrogenase|CO dehydrogenase flavoprotein C-terminal domain|Aldehyde oxidase and xanthine dehydrogenase, a/b hammerhead domain|Aldehyde oxidase and xanthine dehydrogenase, molybdopterin binding domain	similar to Probable aldehyde oxidase 4	electron transporter activity,iron ion binding,electron transport,oxidoreductase activity	None
chromosome_2	13073014	-	G	A	Sb02g009160	0	1014	1014	338	Q	*	Mitogen-activated protein kinase (MAPK) kinase MKK3/MKK6	SERINE-THREONINE PROTEIN KINASE, PLANT-TYPE	Legume lectin domain|Protein kinase domain|Protein tyrosine kinase	similar to Putative uncharacterized protein	protein kinase activity,protein serine/threonine kinase activity,protein-tyrosine kinase activity,ATP binding,protein amino acid phosphorylation	None
chromosome_2	13158817	+	G	A	Sb02g009195	2	17	17	6	W	*	None	None	None	similar to Putative uncharacterized protein OSJNBa0059G01.5	None	None
chromosome_2	13173594	-	C	T	Sb02g009210	1	87	87	29	W	*	None	None	None	Predicted protein	None	None
chromosome_2	13173614	-	G	A	Sb02g009210	0	67	67	23	Q	*	None	None	None	Predicted protein	None	None
chromosome_2	13227219	-	G	A	Sb02g009236	0	388	388	130	Q	*	None	None	Protein of unknown function (DUF 659)	weakly similar to Chromosome undetermined scaffold_109, whole genome shotgun sequence	None	None
chromosome_2	13227419	-	C	T	Sb02g009236	2	188	188	63	W	*	None	None	Protein of unknown function (DUF 659)	weakly similar to Chromosome undetermined scaffold_109, whole genome shotgun sequence	None	None
chromosome_2	13227426	-	G	A	Sb02g009236	0	181	181	61	Q	*	None	None	Protein of unknown function (DUF 659)	weakly similar to Chromosome undetermined scaffold_109, whole genome shotgun sequence	None	None
chromosome_2	13363403	+	A	T	Sb02g009335	0	916	820	274	K	*	None	None	None	Predicted protein	None	None
chromosome_2	13365896	+	C	A	Sb02g009335	1	3409	2853	951	Y	*	None	None	None	Predicted protein	None	None
chromosome_2	13417752	-	G	A	Sb02g009370	0	193	193	65	Q	*	None	None	Glycosyl hydrolases family 18	similar to Putative uncharacterized protein	catalytic activity,carbohydrate metabolism,metabolism,hydrolase activity	Chitinase.;Hydrolysis of the 1,4-beta-linkages of N-acetyl-D-glucosamine polymers of chitin.;\N;\N;Aminosugars metabolism;Metabolism of Complex Carbohydrates;METABOLIC
chromosome_2	13446324	+	C	T	Sb02g009400	0	799	576	192	R	*	Cytochrome P450 CYP2 subfamily	CYTOCHROME P450	Cytochrome P450	weakly similar to Chromosome chr6 scaffold_3, whole genome shotgun sequence	monooxygenase activity,electron transport	Acting on paired donors, with incorporation or reduction of;\N;\N;\N;gamma-Hexachlorocyclohexane degradation;Biodegradation of Xenobiotics;METABOLIC,Acting on paired donors, with incorporation or reduction of;\N;\N;\N;Ascorbate and aldarate metabolism;Carbohydrate Metabolism;METABOLIC,Acting on paired donors, with incorporation or reduction of;\N;\N;\N;Flavonoids, stilbene and lignin biosynthesis…
chromosome_2	13447412	+	C	T	Sb02g009400	0	1887	1555	519	Q	*	Cytochrome P450 CYP2 subfamily	CYTOCHROME P450	Cytochrome P450	weakly similar to Chromosome chr6 scaffold_3, whole genome shotgun sequence	monooxygenase activity,electron transport	Acting on paired donors, with incorporation or reduction of;\N;\N;\N;gamma-Hexachlorocyclohexane degradation;Biodegradation of Xenobiotics;METABOLIC,Acting on paired donors, with incorporation or reduction of;\N;\N;\N;Ascorbate and aldarate metabolism;Carbohydrate Metabolism;METABOLIC,Acting on paired donors, with incorporation or reduction of;\N;\N;\N;Flavonoids, stilbene and lignin biosynthesis…
chromosome_2	13495882	-	C	A	Sb02g009430	0	211	211	71	E	*	None	FAS-ASSOCIATED PROTEIN	UBX domain	Predicted protein	nitrogen fixation,nitrogenase activity	Peptidylprolyl isomerase.;Peptidylproline (omega=180) = peptidylproline (omega=0).;\N;\N;\N;\N;\N
chromosome_2	13563736	+	A	T	Sb02g009480	0	2061	370	124	R	*	Mitochondrial carrier protein PET8	MITOCHONDRIAL CARRIER PROTEIN RELATED	Mitochondrial carrier protein|Mitochondrial carrier protein|Mitochondrial carrier protein	similar to Mitochondrial aspartate-glutamate carrier protein-like	binding,mitochondrial inner membrane,transport,membrane	None
chromosome_2	13604335	-	C	A	Sb02g009530	0	1370	792	264	E	*	Copper chaperone	COPPER TRANSPORT PROTEIN ATOX1-RELATED	Heavy-metal-associated domain|Heavy-metal-associated domain	weakly similar to Putative heavy-metal-associated domain-containing protein	metal ion transport,metal ion binding	None
chromosome_2	13767107	+	C	T	Sb02g009620	0	447	346	116	R	*	None	None	None	Predicted protein	None	None
chromosome_2	13878498	-	C	A	Sb02g009690	0	2911	2911	971	E	*	None	DNAJ/HSP40	DnaJ domain	Predicted protein	protein folding,heat shock protein binding,unfolded protein binding	None
chromosome_2	13927062	-	T	A	Sb02g009720	0	827	697	233	K	*	None	None	None	similar to Putative uncharacterized protein	catalytic activity	None
chromosome_2	14015237	-	G	A	Sb02g009770	0	278	278	93	Q	*	None	None	GAGA binding protein-like family	similar to GAGA binding protein-like family protein, expressed	None	None
chromosome_2	14092905	-	G	A	Sb02g009796	0	666	666	222	Q	*	None	None	None	Predicted protein	None	None
chromosome_2	14093421	-	G	A	Sb02g009796	0	150	150	50	Q	*	None	None	None	Predicted protein	None	None
chromosome_2	14122282	+	G	A	Sb02g009798	1	741	585	195	W	*	None	GAG-POL-RELATED RETROTRANSPOSON	Zinc knuckle	similar to OSJNBa0079F16.4 protein	nucleic acid binding	None
chromosome_2	14323633	-	C	A	Sb02g009860	0	2058	1275	425	E	*	Transcription factor PHOX2/ARIX, contains HOX domain	HOMEOBOX PROTEIN	Homeobox domain|START domain	Predicted protein	DNA binding,transcription factor activity,nucleus,regulation of transcription, DNA-dependent	None
chromosome_2	14477372	-	G	A	Sb02g009920	0	603	551	184	R	*	None	None	None	Predicted protein	None	None
chromosome_2	14795833	+	G	T	Sb02g010070	0	11470	4180	1394	G	*	Uncharacterized protein CLU1/cluA/TIF31 involved in mitochondrial morphology/distribution, also found associated with eIF-3	EUKARYOTIC TRANSLATION INITIATION FACTOR 3 SUBUNIT (EIF-3)	Tetratricopeptide repeat|Tetratricopeptide repeat|Tetratricopeptide repeat|Tetratricopeptide repeat|Tetratricopeptide repeat|Tetratricopeptide repeat|Tetratricopeptide repeat	similar to Putative tetratricopeptide repeat(TPR)-containing protein	DNA ligase (ATP) activity,ATP binding,DNA replication,DNA repair,DNA recombination	None
chromosome_2	14805730	+	C	T	Sb02g010080	0	840	474	158	R	*	None	None	AWPM-19-like family	similar to Hydrophobic LEA-like protein	None	None
chromosome_2	14834263	+	A	T	Sb02g010090	0	349	217	73	K	*	None	None	F-box domain	weakly similar to Putative uncharacterized protein	None	None
chromosome_2	14847259	-	G	A	Sb02g010110	0	1409	2143	715	R	*	None	SUBFAMILY NOT NAMED	PHD-finger|Cellulose synthase	similar to Cellulose synthase-7	ubiquitin ligase complex,ubiquitin-protein ligase activity,zinc ion binding,membrane,protein ubiquitination,cellulose synthase (UDP-forming) activity,cellulose biosynthesis	None
chromosome_2	14880080	-	C	A	Sb02g010130	0	984	471	157	G	*	None	None	Integral membrane protein DUF6|Integral membrane protein DUF6	similar to Putative uncharacterized protein	membrane	None
chromosome_2	14938321	-	G	A	Sb02g010160	0	2259	659	220	R	*	None	None	BT1 family	similar to Putative uncharacterized protein	membrane	None
chromosome_2	16321173	+	G	T	Sb02g010580	0	1002	907	303	E	*	None	None	None	weakly similar to Putative uncharacterized protein	None	None
chromosome_2	16321218	+	G	T	Sb02g010580	0	1047	952	318	E	*	None	None	None	weakly similar to Putative uncharacterized protein	None	None
chromosome_2	16396099	-	G	A	Sb02g010623	0	640	640	214	Q	*	None	None	None	similar to Transposon protein, putative, CACTA, En/Spm sub-class	None	None
chromosome_2	16396111	-	G	A	Sb02g010623	0	628	628	210	Q	*	None	None	None	similar to Transposon protein, putative, CACTA, En/Spm sub-class	None	None
chromosome_2	16417117	-	C	T	Sb02g010626	2	682	517	173	W	*	None	None	Whi5 like	Predicted protein	None	None
chromosome_2	16417597	-	C	T	Sb02g010626	1	202	202	68	W	*	None	None	Whi5 like	Predicted protein	None	None
chromosome_2	16417761	-	C	A	Sb02g010626	0	38	38	13	E	*	None	None	Whi5 like	Predicted protein	None	None
chromosome_2	16455672	-	G	C	Sb02g010640	2	9248	1233	411	S	*	Predicted 3'-5' exonuclease	POLYMYOSITIS/SCLERODERMA AUTOANTIGEN-RELATED	3'-5' exonuclease|Protein of unknown function DUF82	similar to Os07g0452400 protein	nucleic acid binding,intracellular,3'-5' exonuclease activity	None
chromosome_2	16697899	-	A	T	Sb02g010725	2	2114	1470	490	L	*	None	None	None	Predicted protein	None	None
chromosome_2	16698236	-	G	A	Sb02g010725	0	1777	1133	378	R	*	None	None	None	Predicted protein	None	None
chromosome_2	16699721	-	G	A	Sb02g010725	0	292	292	98	R	*	None	None	None	Predicted protein	None	None
chromosome_2	16725790	-	C	A	Sb02g010740	0	3650	1077	359	G	*	Apoptosis-promoting RNA-binding protein TIA-1/TIAR (RRM superfamily)	RNA-BINDING PROTEIN	RNA recognition motif. (a.k.a. RRM, RBD, or RNP domain)|RNA recognition motif. (a.k.a. RRM, RBD, or RNP domain)|G-patch domain	similar to Putative uncharacterized protein	nucleic acid binding,intracellular	None
chromosome_2	16997503	-	G	A	Sb02g010820	0	19568	809	270	Q	*	None	None	None	Predicted protein	None	None
chromosome_2	16997665	-	G	A	Sb02g010820	0	19406	647	216	Q	*	None	None	None	Predicted protein	None	None
chromosome_2	16997677	-	G	A	Sb02g010820	0	19394	635	212	Q	*	None	None	None	Predicted protein	None	None
chromosome_2	16997812	-	G	A	Sb02g010820	0	19259	500	167	Q	*	None	None	None	Predicted protein	None	None
chromosome_2	17112464	+	C	G	Sb02g010875	2	419	419	140	S	*	None	ARIADNE RING ZINC FINGER	None	similar to Putative uncharacterized protein	ubiquitin ligase complex,ubiquitin-protein ligase activity,zinc ion binding,protein ubiquitination	None
chromosome_2	17410912	-	G	T	Sb02g010950	2	3088	737	246	S	*	None	None	None	similar to Putative transposable element	None	None
chromosome_2	17776767	+	C	T	Sb02g011035	0	2523	1570	524	Q	*	None	ZINC FINGER PROTEIN	hAT family dimerisation domain	similar to Os02g0236500 protein	nucleic acid binding,ATP binding,protein dimerization activity	None
chromosome_2	17778171	-	A	T	Sb02g011040	1	4977	2087	696	C	*	Apoptotic ATPase	None	NB-ARC domain	Predicted protein	ATP binding,apoptosis,defense response,defense response to pathogen	None
chromosome_2	17778243	-	A	T	Sb02g011040	1	4905	2015	672	C	*	Apoptotic ATPase	None	NB-ARC domain	Predicted protein	ATP binding,apoptosis,defense response,defense response to pathogen	None
chromosome_2	17778263	-	G	A	Sb02g011040	0	4885	1995	665	R	*	Apoptotic ATPase	None	NB-ARC domain	Predicted protein	ATP binding,apoptosis,defense response,defense response to pathogen	None
chromosome_2	17778692	-	T	A	Sb02g011040	0	4456	1566	522	K	*	Apoptotic ATPase	None	NB-ARC domain	Predicted protein	ATP binding,apoptosis,defense response,defense response to pathogen	None
chromosome_2	17779172	-	T	A	Sb02g011040	0	3976	1086	362	K	*	Apoptotic ATPase	None	NB-ARC domain	Predicted protein	ATP binding,apoptosis,defense response,defense response to pathogen	None
chromosome_2	17782920	-	C	T	Sb02g011040	2	228	228	76	W	*	Apoptotic ATPase	None	NB-ARC domain	Predicted protein	ATP binding,apoptosis,defense response,defense response to pathogen	None
chromosome_2	17956920	+	C	G	Sb02g011080	1	510	510	170	Y	*	None	None	None	Predicted protein	None	None
chromosome_2	17974121	+	C	A	Sb02g011090	2	2251	1619	540	S	*	None	None	None	Predicted protein	None	None
chromosome_2	17974918	+	G	A	Sb02g011090	2	3048	2144	715	W	*	None	None	None	Predicted protein	None	None
chromosome_2	18003362	-	G	A	Sb02g011095	0	844	844	282	Q	*	None	None	None	Predicted protein	None	None
chromosome_2	18065605	-	C	A	Sb02g011140	0	2447	2200	734	E	*	Tam3-transposase (Ac family)	None	Protein of unknown function, DUF1544|Protein of unknown function (DUF 659)|hAT family dimerisation domain	Predicted protein	DNA binding,protein dimerization activity	None
chromosome_2	18066225	-	G	A	Sb02g011140	0	1827	1747	583	Q	*	Tam3-transposase (Ac family)	None	Protein of unknown function, DUF1544|Protein of unknown function (DUF 659)|hAT family dimerisation domain	Predicted protein	DNA binding,protein dimerization activity	None
chromosome_2	18900676	+	G	T	Sb02g011390	0	2425	1361	454	G	*	None	None	Tetratricopeptide repeat|Tetratricopeptide repeat	similar to Os03g0428800 protein	None	None
chromosome_2	18909709	-	G	A	Sb02g011400	0	2222	1663	555	Q	*	None	None	None	Predicted protein	None	None
chromosome_2	18909975	-	G	T	Sb02g011400	1	1956	1467	489	Y	*	None	None	None	Predicted protein	None	None
chromosome_2	18911085	-	G	T	Sb02g011400	2	846	846	282	S	*	None	None	None	Predicted protein	None	None
chromosome_2	18911485	-	G	A	Sb02g011400	0	446	446	149	Q	*	None	None	None	Predicted protein	None	None
chromosome_2	18995549	-	A	C	Sb02g011432	1	180	180	60	Y	*	None	BED FINGER-RELATED	hAT family dimerisation domain	similar to Putative uncharacterized protein	protein dimerization activity	None
chromosome_2	19234896	-	C	T	Sb02g011546	1	1362	1362	454	W	*	None	REVERSE TRANSCRIPTASES	Reverse transcriptase (RNA-dependent DNA polymerase)	weakly similar to Putative non-LTR retroelement reverse transcriptase	RNA binding,RNA-directed DNA polymerase activity,RNA-dependent DNA replication,proteolysis and peptidolysis,metallopeptidase activity,zinc ion binding	None
chromosome_2	19235516	-	G	A	Sb02g011546	0	742	742	248	Q	*	None	REVERSE TRANSCRIPTASES	Reverse transcriptase (RNA-dependent DNA polymerase)	weakly similar to Putative non-LTR retroelement reverse transcriptase	RNA binding,RNA-directed DNA polymerase activity,RNA-dependent DNA replication,proteolysis and peptidolysis,metallopeptidase activity,zinc ion binding	None
chromosome_2	19235530	-	C	T	Sb02g011546	2	728	728	243	W	*	None	REVERSE TRANSCRIPTASES	Reverse transcriptase (RNA-dependent DNA polymerase)	weakly similar to Putative non-LTR retroelement reverse transcriptase	RNA binding,RNA-directed DNA polymerase activity,RNA-dependent DNA replication,proteolysis and peptidolysis,metallopeptidase activity,zinc ion binding	None
chromosome_2	19236002	-	G	A	Sb02g011546	0	256	256	86	Q	*	None	REVERSE TRANSCRIPTASES	Reverse transcriptase (RNA-dependent DNA polymerase)	weakly similar to Putative non-LTR retroelement reverse transcriptase	RNA binding,RNA-directed DNA polymerase activity,RNA-dependent DNA replication,proteolysis and peptidolysis,metallopeptidase activity,zinc ion binding	None
chromosome_2	19460104	-	G	A	Sb02g011613	0	1019	790	264	Q	*	None	None	None	Predicted protein	None	None
chromosome_2	19460260	-	G	A	Sb02g011613	0	863	634	212	R	*	None	None	None	Predicted protein	None	None
chromosome_2	19759612	-	G	A	Sb02g011791	0	160	160	54	Q	*	None	None	None	Predicted protein	None	None
chromosome_2	19867740	+	A	T	Sb02g011932	0	124	124	42	K	*	None	gb def: WD repeat domain protein	None	similar to Protein HIRA	None	None
chromosome_2	20017581	-	G	A	Sb02g011960	0	180	180	60	R	*	None	None	None	similar to 26S proteasome ATPase subunit Rpt6	None	None
chromosome_2	20049729	+	G	T	Sb02g011975	0	634	145	49	E	*	None	60S RIBOSOMAL PROTEIN L10A - RELATED	None	similar to Putative uncharacterized protein	structural constituent of ribosome,intracellular,ribosome,protein biosynthesis	None
chromosome_2	20109712	-	G	T	Sb02g011996	2	903	840	280	S	*	None	GAG-POL-RELATED RETROTRANSPOSON	Reverse transcriptase (RNA-dependent DNA polymerase)	similar to Os07g0434200 protein	None	None
chromosome_2	20109844	-	C	T	Sb02g011996	2	771	708	236	W	*	None	GAG-POL-RELATED RETROTRANSPOSON	Reverse transcriptase (RNA-dependent DNA polymerase)	similar to Os07g0434200 protein	None	None
chromosome_2	20208458	+	C	T	Sb02g012060	0	196	196	66	Q	*	None	None	None	similar to Putative uncharacterized protein	None	None
chromosome_2	20708032	-	C	T	Sb02g012350	1	929	763	255	W	*	Predicted transposase	FAMILY NOT NAMED	None	similar to Transposon protein, putative, CACTA, En/Spm sub-class	nucleic acid binding	None
chromosome_2	20926306	+	A	T	Sb02g012420	0	1655	498	166	K	*	Dehydrogenases with different specificities (related to short-chain alcohol dehydrogenases)	SHORT-CHAIN DEHYDROGENASES/REDUCTASE	short chain dehydrogenase	similar to Os09g0570300 protein	metabolism,oxidoreductase activity	With NAD(+) or NADP(+) as acceptor.;\N;\N;\N;Bile acid biosynthesis;Lipid Metabolism;METABOLIC,With NAD(+) or NADP(+) as acceptor.;\N;\N;\N;Vitamin B6 metabolism;Metabolism of Cofactors and Vitamins;METABOLIC,With NAD(+) or NADP(+) as acceptor.;\N;\N;\N;Glycine, serine and threonine metabolism;Amino Acid Metabolism;METABOLIC,With NAD(+) or NADP(+) as acceptor.;\N;\N;\N;Butanoate metabolism;Carboh…
chromosome_2	21077125	-	G	A	Sb02g012450	0	4032	3031	1011	Q	*	None	None	None	Predicted protein	None	None
chromosome_2	21078553	-	G	A	Sb02g012450	0	2604	2018	673	R	*	None	None	None	Predicted protein	None	None
chromosome_2	21079209	-	C	T	Sb02g012450	2	1948	1362	454	W	*	None	None	None	Predicted protein	None	None
chromosome_2	21109348	-	G	A	Sb02g012460	0	1134	1134	378	R	*	None	None	None	Predicted protein	None	None
chromosome_2	21109474	-	C	A	Sb02g012460	0	1008	1008	336	E	*	None	None	None	Predicted protein	None	None
chromosome_2	21110209	-	G	A	Sb02g012460	0	273	273	91	R	*	None	None	None	Predicted protein	None	None
chromosome_2	21231614	+	G	A	Sb02g012480	1	616	525	175	W	*	None	FAMILY NOT NAMED	None	similar to Os06g0226000 protein	None	None
chromosome_2	21249244	+	C	T	Sb02g012505	0	676	577	193	Q	*	None	None	None	Predicted protein	None	None
chromosome_2	21420234	+	C	A	Sb02g012515	1	1140	570	190	Y	*	None	None	None	similar to Putative polyprotein	None	None
chromosome_2	21426777	+	C	A	Sb02g012530	1	1452	981	327	Y	*	None	None	None	Predicted protein	None	None
chromosome_2	21427578	+	G	T	Sb02g012530	0	2253	1432	478	E	*	None	None	None	Predicted protein	None	None
chromosome_2	21703682	-	G	A	Sb02g012600	0	106	106	36	Q	*	None	REPLICATION PROTEIN A-RELATED	OB-fold nucleic acid binding domain	similar to Putative replication protein A2	nucleic acid binding	None
chromosome_2	21935784	-	G	A	Sb02g012635	0	218	218	73	Q	*	None	None	None	Predicted protein	None	None
chromosome_2	22405034	-	G	A	Sb02g012863	0	745	745	249	Q	*	None	None	None	Predicted protein	None	None
chromosome_2	22407630	-	C	A	Sb02g012866	0	1216	1216	406	E	*	None	None	Protein of unknown function (DUF1723)	weakly similar to Putative uncharacterized protein P0565A07.109	None	None
chromosome_2	22708697	-	C	A	Sb02g012975	0	16	16	6	E	*	None	ZINC FINGER CCHC DOMAIN CONTAINING PROTEIN	Zinc knuckle|Zinc knuckle	similar to Zinc knuckle family protein	nucleic acid binding	None
chromosome_2	23200414	-	C	T	Sb02g013090	2	14848	2033	678	W	*	None	None	SWIM zinc finger|Zinc knuckle	similar to Transposon protein, putative, Mutator sub-class	nucleic acid binding	None
chromosome_2	23200912	-	C	T	Sb02g013090	2	14350	1535	512	W	*	None	None	SWIM zinc finger|Zinc knuckle	similar to Transposon protein, putative, Mutator sub-class	nucleic acid binding	None
chromosome_2	23214368	-	G	C	Sb02g013090	2	894	780	260	S	*	None	None	SWIM zinc finger|Zinc knuckle	similar to Transposon protein, putative, Mutator sub-class	nucleic acid binding	None
chromosome_2	23214821	-	T	A	Sb02g013090	0	441	441	147	R	*	None	None	SWIM zinc finger|Zinc knuckle	similar to Transposon protein, putative, Mutator sub-class	nucleic acid binding	None
chromosome_2	23215173	-	G	T	Sb02g013090	1	89	89	30	C	*	None	None	SWIM zinc finger|Zinc knuckle	similar to Transposon protein, putative, Mutator sub-class	nucleic acid binding	None
chromosome_2	23222037	-	C	T	Sb02g013100	2	1396	1396	466	W	*	Serine/threonine protein kinase	SERINE-THREONINE PROTEIN KINASE, PLANT-TYPE	Leucine rich repeat N-terminal domain|Leucine Rich Repeat|Leucine Rich Repeat|Leucine Rich Repeat|Leucine Rich Repeat|Leucine Rich Repeat|Leucine Rich Repeat|Protein kinase domain	similar to Putative receptor-like kinase RHG1	protein kinase activity,protein serine/threonine kinase activity,protein-tyrosine kinase activity,ATP binding,protein amino acid phosphorylation	None
chromosome_2	23352929	-	G	T	Sb02g013130	2	2593	1706	569	S	*	None	None	None	similar to Putative uncharacterized protein	None	None
chromosome_2	23354548	-	G	A	Sb02g013130	0	974	180	60	Q	*	None	None	None	similar to Putative uncharacterized protein	None	None
chromosome_2	23475813	-	C	A	Sb02g013138	0	907	907	303	E	*	None	PENTATRICOPEPTIDE REPEAT-CONTAINING PROTEIN	PPR repeat|PPR repeat|PPR repeat|PPR repeat|PPR repeat|PPR repeat|PPR repeat|PPR repeat|PPR repeat|PPR repeat|PPR repeat|PPR repeat|PPR repeat|PPR repeat	similar to PPR protein-like protein	None	None
chromosome_2	23537327	-	T	A	Sb02g013140	0	11903	2238	746	K	*	None	None	None	Predicted protein	None	None
chromosome_2	23621169	+	G	A	Sb02g013155	2	962	785	262	W	*	None	None	None	Predicted protein	None	None
chromosome_2	24660591	+	C	T	Sb02g013291	0	2562	2071	691	Q	*	None	None	None	Predicted protein	None	None
chromosome_2	25003812	-	G	A	Sb02g013323	0	304	304	102	Q	*	None	REVERSE TRANSCRIPTASES	None	similar to Os10g0351300 protein	None	None
chromosome_2	25769965	-	G	A	Sb02g013723	0	351	351	117	R	*	None	None	None	Predicted protein	metabolism,oxidoreductase activity	None
chromosome_2	26326559	-	G	T	Sb02g014030	1	2910	2090	697	Y	*	None	None	MuDR family transposase	Predicted protein	None	None
chromosome_2	26327606	-	G	A	Sb02g014030	0	1863	1446	482	Q	*	None	None	MuDR family transposase	Predicted protein	None	None
chromosome_2	26938197	-	G	A	Sb02g014230	0	985	844	282	Q	*	None	None	None	weakly similar to Putative transposon protein	None	None
chromosome_2	26938254	-	G	A	Sb02g014230	0	928	787	263	Q	*	None	None	None	weakly similar to Putative transposon protein	None	None
chromosome_2	29514795	-	G	T	Sb02g015110	2	4013	5112	1704	S	*	None	SMG-7 (SUPPRESSOR WITH MORPHOLOGICAL EFFECT ON GENITALIA PROTEIN 7)	None	similar to Os08g0305300 protein	None	None
chromosome_2	29768924	+	C	T	Sb02g015310	0	97	97	33	Q	*	None	None	Zinc knuckle|Zinc knuckle	Predicted protein	None	None
chromosome_2	29770458	+	G	A	Sb02g015310	2	1631	1562	521	W	*	None	None	Zinc knuckle|Zinc knuckle	Predicted protein	None	None
chromosome_2	29770809	+	G	A	Sb02g015310	2	1982	1913	638	W	*	None	None	Zinc knuckle|Zinc knuckle	Predicted protein	None	None
chromosome_2	29771312	+	C	T	Sb02g015310	0	2485	2416	806	Q	*	None	None	Zinc knuckle|Zinc knuckle	Predicted protein	None	None
chromosome_2	29775941	-	G	A	Sb02g015315	0	76	76	26	Q	*	None	None	None	Predicted protein	None	None
chromosome_2	31902364	+	C	T	Sb02g015750	0	1797	1399	467	Q	*	None	None	Putative gypsy type transposon	Predicted protein	None	None
chromosome_2	31902643	+	C	T	Sb02g015750	0	2076	1588	530	R	*	None	None	Putative gypsy type transposon	Predicted protein	None	None
chromosome_2	31902767	+	G	A	Sb02g015750	2	2200	1712	571	W	*	None	None	Putative gypsy type transposon	Predicted protein	None	None
chromosome_2	31904025	+	G	T	Sb02g015755	0	316	316	106	E	*	None	None	None	Predicted protein	None	None
chromosome_2	31904604	+	C	T	Sb02g015755	0	895	820	274	R	*	None	None	None	Predicted protein	None	None
chromosome_2	31909636	-	G	A	Sb02g015765	0	734	231	77	R	*	None	RETROELEMENT POL POLYPROTEIN	Retrotransposon gag protein	similar to Putative gag-pol-orf1	None	None
chromosome_2	32041469	-	G	A	Sb02g015767	0	990	381	127	Q	*	None	None	None	similar to Transposon protein, putative, CACTA, En/Spm sub-class	None	None
chromosome_2	32041538	-	G	A	Sb02g015767	0	921	312	104	Q	*	None	None	None	similar to Transposon protein, putative, CACTA, En/Spm sub-class	None	None
chromosome_2	32041616	-	G	A	Sb02g015767	0	843	234	78	Q	*	None	None	None	similar to Transposon protein, putative, CACTA, En/Spm sub-class	None	None
chromosome_2	36799151	-	C	T	Sb02g015990	2	194	194	65	W	*	None	None	None	similar to BRI1-KD interacting protein 128	None	None
chromosome_2	37109653	-	T	A	Sb02g016200	0	11163	17409	5803	R	*	E3 ubiquitin-protein ligase/Putative upstream regulatory element binding protein	UBIQUITIN-PROTEIN LIGASE	Domain of Unknown Function (DUF908)|Domain of Unknown Function (DUF913)|UBA/TS-N domain|Ubiquitin interaction motif|HECT-domain (ubiquitin-transferase)	similar to Putative uncharacterized protein	ubiquitin-protein ligase activity,intracellular,cytoplasm,protein modification,ubiquitin cycle,mRNA transport	Ubiquitin--protein ligase.;ATP + ubiquitin + protein lysine = AMP + diphosphate + protein N-ubiquityllysine.;\N;\N;\N;\N;\N
chromosome_2	37111996	-	C	A	Sb02g016200	0	8820	16417	5473	G	*	E3 ubiquitin-protein ligase/Putative upstream regulatory element binding protein	UBIQUITIN-PROTEIN LIGASE	Domain of Unknown Function (DUF908)|Domain of Unknown Function (DUF913)|UBA/TS-N domain|Ubiquitin interaction motif|HECT-domain (ubiquitin-transferase)	similar to Putative uncharacterized protein	ubiquitin-protein ligase activity,intracellular,cytoplasm,protein modification,ubiquitin cycle,mRNA transport	Ubiquitin--protein ligase.;ATP + ubiquitin + protein lysine = AMP + diphosphate + protein N-ubiquityllysine.;\N;\N;\N;\N;\N
chromosome_2	38882541	+	G	A	Sb02g016953	2	437	401	134	W	*	None	REVERSE TRANSCRIPTASES	None	similar to Os10g0351300 protein	None	None
chromosome_2	39402435	+	C	T	Sb02g017020	0	583	583	195	R	*	None	GAG/POL/ENV POLYPROTEIN	Integrase core domain	similar to Putative GAG-POL-orf2 protein	DNA binding,DNA recombination	None
chromosome_2	40022885	+	G	A	Sb02g017230	2	1950	1553	518	W	*	None	None	None	Predicted protein	None	None
chromosome_2	40187806	-	A	T	Sb02g017250	1	911	815	272	Y	*	None	None	PB1 domain	weakly similar to Putative uncharacterized protein	None	None
chromosome_2	40187919	-	G	A	Sb02g017250	0	798	702	234	R	*	None	None	PB1 domain	weakly similar to Putative uncharacterized protein	None	None
chromosome_2	40188017	-	G	C	Sb02g017250	2	700	604	202	S	*	None	None	PB1 domain	weakly similar to Putative uncharacterized protein	None	None
chromosome_2	40217103	-	G	A	Sb02g017260	0	100	100	34	Q	*	None	None	None	Predicted protein	None	None
chromosome_2	40404388	+	C	T	Sb02g017270	0	67	67	23	Q	*	None	None	None	similar to Transposase family tnp2 protein	None	None
chromosome_2	40407885	+	C	T	Sb02g017275	0	574	574	192	Q	*	None	None	None	Predicted protein	None	None
chromosome_2	40408455	+	C	T	Sb02g017275	0	1144	1144	382	R	*	None	None	None	Predicted protein	None	None
chromosome_2	40408939	+	C	T	Sb02g017275	0	1628	1546	516	Q	*	None	None	None	Predicted protein	None	None
chromosome_2	40529045	+	C	T	Sb02g017290	0	1962	644	215	Q	*	None	None	Glycosyl hydrolases family 17|X8 domain	similar to Putative uncharacterized protein	hydrolase activity, hydrolyzing O-glycosyl compounds,carbohydrate metabolism	Glucan endo-1,3-beta-D-glucosidase.;Hydrolysis of 1,3-beta-D-glucosidic linkages in 1,3-beta-D-glucans.;\N;\N;Starch and sucrose metabolism;Metabolism of Complex Carbohydrates;METABOLIC
chromosome_2	41756733	-	T	A	Sb02g017611	0	9839	526	176	K	*	None	None	None	weakly similar to Transposon protein, putative, CACTA, En/Spm sub-class	None	None
chromosome_2	41757989	-	G	A	Sb02g017611	0	8583	245	82	R	*	None	None	None	weakly similar to Transposon protein, putative, CACTA, En/Spm sub-class	None	None
chromosome_2	41758109	-	G	A	Sb02g017611	0	8463	125	42	R	*	None	None	None	weakly similar to Transposon protein, putative, CACTA, En/Spm sub-class	None	None
chromosome_2	41900520	-	G	T	Sb02g017690	2	134	134	45	S	*	None	None	None	similar to Putative uncharacterized protein orf117-c	None	None
chromosome_2	41928189	-	G	A	Sb02g017799	0	137	137	46	R	*	None	DNA-DIRECTED RNA POLYMERASE I SUBUNIT 2	None	similar to DNA-directed RNA polymerase subunit beta	None	None
chromosome_2	41928279	-	C	A	Sb02g017799	0	47	47	16	E	*	None	DNA-DIRECTED RNA POLYMERASE I SUBUNIT 2	None	similar to DNA-directed RNA polymerase subunit beta	None	None
chromosome_2	43786409	-	G	A	Sb02g018043	0	826	469	157	R	*	None	None	None	Predicted protein	None	None
chromosome_2	43789331	-	G	A	Sb02g018110	0	265	265	89	Q	*	None	None	Putative gypsy type transposon	weakly similar to RIRE2 orf3	None	None
chromosome_2	45081971	+	A	T	Sb02g018540	0	10470	373	125	R	*	None	None	Late embryogenesis abundant (LEA) group 1	similar to Os09g0278000 protein	embryonic development	None
chromosome_2	45977973	+	C	G	Sb02g018900	1	2956	339	113	Y	*	None	None	None	similar to Putative uncharacterized protein	None	None
chromosome_2	45980371	-	G	A	Sb02g018910	0	14761	4698	1566	R	*	Thyroid hormone receptor-associated coactivator complex component (TRAP170)	FAMILY NOT NAMED	Mediator complex subunit MED14	similar to Thyroid hormone receptor-associated protein complex component TRAP170- like protein	rhodopsin-like receptor activity,G-protein coupled receptor protein signaling pathway,integral to membrane	None
chromosome_2	46742249	-	G	C	Sb02g019335	2	647	506	169	S	*	None	None	Transposase family tnp2	weakly similar to OSJNBa0042N22.16 protein	None	None
chromosome_2	46742252	-	C	T	Sb02g019335	2	644	503	168	W	*	None	None	Transposase family tnp2	weakly similar to OSJNBa0042N22.16 protein	None	None
chromosome_2	46756295	-	T	A	Sb02g019350	0	93	93	31	R	*	None	SERINE-THREONINE PROTEIN KINASE, PLANT-TYPE	D-mannose binding lectin|S-locus glycoprotein family|PAN-like domain|PAN domain|Protein kinase domain	similar to Os07g0186200 protein	protein kinase activity,protein serine/threonine kinase activity,protein-tyrosine kinase activity,ATP binding,sugar binding,protein amino acid phosphorylation	None
chromosome_2	46862283	-	C	A	Sb02g019370	0	648	178	60	G	*	None	STRUCTURAL MAINTENANCE OF CHROMOSOMES 5,6 (SMC5, SMC6)	None	similar to Os09g0121000 protein	None	None
chromosome_2	46864920	-	C	T	Sb02g019373	2	260	260	87	W	*	None	NUCLEAR PROTEIN 95	PHD-finger	similar to Putative uncharacterized protein	DNA binding,regulation of transcription, DNA-dependent	None
chromosome_2	46947327	-	G	T	Sb02g019410	2	1993	1035	345	S	*	Cytochrome P450	CYTOCHROME P450	Cytochrome P450	similar to Os05g0416400 protein	monooxygenase activity,electron transport	None
chromosome_2	46951941	+	C	A	Sb02g019420	1	42	42	14	Y	*	None	None	None	similar to OSJNBa0042N22.16 protein	None	None
chromosome_2	46952409	+	G	T	Sb02g019420	0	510	481	161	E	*	None	None	None	similar to OSJNBa0042N22.16 protein	None	None
chromosome_2	46978417	-	G	A	Sb02g019430	0	1049	887	296	Q	*	None	None	None	Predicted protein	None	None
chromosome_2	46978456	-	G	A	Sb02g019430	0	1010	848	283	R	*	None	None	None	Predicted protein	None	None
chromosome_2	46978576	-	G	A	Sb02g019430	0	890	728	243	R	*	None	None	None	Predicted protein	None	None
chromosome_2	47169935	-	G	A	Sb02g019460	0	1707	816	272	Q	*	FKBP-type peptidyl-prolyl cis-trans isomerase	FK506 BINDING PROTEIN	FKBP-type peptidyl-prolyl cis-trans isomerase	similar to Peptidyl-prolyl cis-trans isomerase	protein folding	Peptidylprolyl isomerase.;Peptidylproline (omega=180) = peptidylproline (omega=0).;\N;\N;\N;\N;\N
chromosome_2	47170182	-	G	C	Sb02g019460	1	1460	569	190	Y	*	FKBP-type peptidyl-prolyl cis-trans isomerase	FK506 BINDING PROTEIN	FKBP-type peptidyl-prolyl cis-trans isomerase	similar to Peptidyl-prolyl cis-trans isomerase	protein folding	Peptidylprolyl isomerase.;Peptidylproline (omega=180) = peptidylproline (omega=0).;\N;\N;\N;\N;\N
chromosome_2	47301563	+	G	T	Sb02g019488	0	1402	1402	468	E	*	None	None	Zinc knuckle|Zinc knuckle	Predicted protein	nucleic acid binding	None
chromosome_2	47635227	-	G	A	Sb02g019550	0	168	168	56	Q	*	None	ZINC FINGER FYVE DOMAIN CONTAINING PROTEIN	GDSL-like Lipase/Acylhydrolase	similar to GDSL-lipase-like	catalytic activity	None
chromosome_2	48024754	-	C	A	Sb02g019711	0	5098	994	332	E	*	26S proteasome regulatory complex, subunit PSMD10	ANKYRIN REPEAT-CONTAINING	Ankyrin repeat|Ankyrin repeat|Ankyrin repeat|Ankyrin repeat|Ankyrin repeat	Predicted protein	None	None
chromosome_2	48458103	+	G	T	Sb02g019830	0	514	427	143	E	*	None	None	None	weakly similar to Transposon protein, putative, CACTA, En/Spm sub-class	None	None
chromosome_2	48485454	+	G	T	Sb02g019881	0	37	37	13	E	*	None	None	None	Predicted protein	None	None
chromosome_2	48654167	+	C	T	Sb02g019981	0	91	91	31	Q	*	None	None	None	Predicted protein	None	None
chromosome_2	48654173	+	C	T	Sb02g019981	0	97	97	33	Q	*	None	None	None	Predicted protein	None	None
chromosome_2	48654218	+	C	T	Sb02g019981	0	142	142	48	Q	*	None	None	None	Predicted protein	None	None
chromosome_2	48655748	+	C	T	Sb02g019981	0	1672	1579	527	Q	*	None	None	None	Predicted protein	None	None
chromosome_2	48692557	+	C	T	Sb02g019981	0	38481	3019	1007	Q	*	None	None	None	Predicted protein	None	None
chromosome_2	48713298	-	C	A	Sb02g020030	0	5303	1000	334	E	*	26S proteasome regulatory complex, subunit PSMD10	ANKYRIN REPEAT-CONTAINING	Ankyrin repeat|Ankyrin repeat|Ankyrin repeat|Ankyrin repeat|Ankyrin repeat|Ankyrin repeat|Ankyrin repeat|Tetratricopeptide repeat|Tetratricopeptide repeat	Predicted protein	None	None
chromosome_2	48718125	-	C	A	Sb02g020030	0	476	267	89	G	*	26S proteasome regulatory complex, subunit PSMD10	ANKYRIN REPEAT-CONTAINING	Ankyrin repeat|Ankyrin repeat|Ankyrin repeat|Ankyrin repeat|Ankyrin repeat|Ankyrin repeat|Ankyrin repeat|Tetratricopeptide repeat|Tetratricopeptide repeat	Predicted protein	None	None
chromosome_2	49438728	+	C	T	Sb02g020370	0	115	115	39	Q	*	None	None	Zinc knuckle	similar to Putative uncharacterized protein	nucleic acid binding	None
chromosome_2	49565732	-	G	A	Sb02g020420	0	13678	2133	711	Q	*	None	HELICASE-RELATED	Eukaryotic protein of unknown function (DUF889)	weakly similar to DNA binding protein-like	nucleic acid binding	None
chromosome_2	49741098	+	C	A	Sb02g020465	1	102	102	34	C	*	None	None	None	Predicted protein	None	None
chromosome_2	49761398	-	C	A	Sb02g020475	0	225	225	75	G	*	DNA helicase	DNA2/NAM7 HELICASE FAMILY	None	similar to Os09g0130800 protein	ATP binding,ATP-dependent helicase activity	None
chromosome_2	49770005	-	G	A	Sb02g020480	0	2662	2493	831	R	*	None	None	None	Predicted protein	None	None
chromosome_2	49771181	-	C	A	Sb02g020480	0	1486	1486	496	E	*	None	None	None	Predicted protein	None	None
chromosome_2	49792276	-	C	T	Sb02g020485	1	102	102	34	W	*	None	None	None	weakly similar to Transposon protein, putative, CACTA, En/Spm sub-class	None	None
chromosome_2	49792336	-	A	C	Sb02g020485	1	42	42	14	Y	*	None	None	None	weakly similar to Transposon protein, putative, CACTA, En/Spm sub-class	None	None
chromosome_2	49796628	-	T	A	Sb02g020490	0	217	217	73	K	*	None	None	None	similar to Putative TNP2	None	None
chromosome_2	50386886	+	C	T	Sb02g020753	0	2797	895	299	R	*	None	None	SWIM zinc finger	similar to OSIGBa0115A19.2 protein	None	None
chromosome_2	50510575	+	G	T	Sb02g020756	0	2008	1951	651	E	*	None	REVERSE TRANSCRIPTASES	Zinc knuckle|Zinc knuckle	Predicted protein	nucleic acid binding	None
chromosome_2	50683171	-	G	A	Sb02g020765	0	136	136	46	Q	*	None	None	None	Predicted protein	None	None
chromosome_2	50683285	-	C	A	Sb02g020765	0	22	22	8	E	*	None	None	None	Predicted protein	None	None
chromosome_2	50772022	-	C	A	Sb02g020780	0	6	6	2	E	*	None	None	SWIM zinc finger	Predicted protein	None	None
chromosome_2	51022138	-	T	A	Sb02g020800	0	5075	1174	392	K	*	Zn-finger protein joined to JAZF1 (predicted suppressor)	FAMILY NOT NAMED	None	similar to EMF-like	None	None
chromosome_2	51121608	+	G	T	Sb02g020820	0	877	682	228	E	*	DNA helicase PIF1/RRM3	HELICASE-RELATED	Eukaryotic protein of unknown function (DUF889)	similar to DNA helicase homolog, putative	None	None
chromosome_2	51122589	+	C	T	Sb02g020820	0	1858	1585	529	R	*	DNA helicase PIF1/RRM3	HELICASE-RELATED	Eukaryotic protein of unknown function (DUF889)	similar to DNA helicase homolog, putative	None	None
chromosome_2	51123567	+	C	T	Sb02g020820	0	2836	2563	855	Q	*	DNA helicase PIF1/RRM3	HELICASE-RELATED	Eukaryotic protein of unknown function (DUF889)	similar to DNA helicase homolog, putative	None	None
chromosome_2	51124374	+	G	T	Sb02g020820	0	3643	3370	1124	G	*	DNA helicase PIF1/RRM3	HELICASE-RELATED	Eukaryotic protein of unknown function (DUF889)	similar to DNA helicase homolog, putative	None	None
chromosome_2	51253683	+	G	T	Sb02g020842	0	403	403	135	E	*	None	None	None	similar to Os05g0232800 protein	None	None
chromosome_2	51638197	-	G	C	Sb02g020900	1	720	720	240	Y	*	None	None	AP2 domain	weakly similar to Os09g0309700 protein	transcription factor activity,nucleus,regulation of transcription, DNA-dependent	None
chromosome_2	51929470	-	G	A	Sb02g020990	0	830	734	245	R	*	None	None	None	Predicted protein	None	None
chromosome_2	51929665	-	G	A	Sb02g020990	0	635	539	180	Q	*	None	None	None	Predicted protein	None	None
chromosome_2	51930058	-	G	A	Sb02g020990	0	242	146	49	R	*	None	None	None	Predicted protein	None	None
chromosome_2	51974718	+	C	A	Sb02g021010	1	870	870	290	Y	*	None	None	None	weakly similar to OSIGBa0092J07.2 protein	None	None
chromosome_2	52256498	+	C	T	Sb02g021103	0	1454	721	241	Q	*	None	None	None	similar to Expressed protein	None	None
chromosome_2	52315004	+	C	A	Sb02g021110	2	3644	1595	532	S	*	None	ANKYRIN REPEAT-CONTAINING	Ankyrin repeat|Ankyrin repeat|Ankyrin repeat|Ankyrin repeat|Ankyrin repeat|Ankyrin repeat|Ankyrin repeat	weakly similar to Os09g0322500 protein	None	None
chromosome_2	52398787	-	C	T	Sb02g021140	2	689	689	230	W	*	None	REVERSE TRANSCRIPTASES	Endonuclease/Exonuclease/phosphatase family	weakly similar to H0215A08.3 protein	None	None
chromosome_2	52529115	-	G	A	Sb02g021160	0	779	677	226	Q	*	None	None	None	Predicted protein	None	None
chromosome_2	52529641	-	G	A	Sb02g021160	0	253	253	85	Q	*	None	None	None	Predicted protein	None	None
chromosome_2	52530458	-	G	A	Sb02g021170	0	853	760	254	R	*	None	None	None	Predicted protein	None	None
chromosome_2	52531283	-	G	A	Sb02g021170	0	28	28	10	R	*	None	None	None	Predicted protein	None	None
chromosome_2	52735283	-	T	A	Sb02g021226	0	1300	1300	434	K	*	Apoptotic ATPase	None	NB-ARC domain|WRKY DNA -binding domain|WRKY DNA -binding domain	Predicted protein	DNA binding,ATP binding,apoptosis,defense response,defense response to pathogen	None
chromosome_2	52771815	+	C	T	Sb02g021240	0	901	901	301	Q	*	None	None	None	Predicted protein	None	None
chromosome_2	52772400	+	G	T	Sb02g021240	0	1486	1486	496	E	*	None	None	None	Predicted protein	None	None
chromosome_2	53049703	-	G	A	Sb02g021460	0	221	144	48	Q	*	None	None	None	Predicted protein	None	None
chromosome_2	53049904	-	G	A	Sb02g021460	0	20	20	7	R	*	None	None	None	Predicted protein	None	None
chromosome_2	53149177	-	C	A	Sb02g021470	0	1115	551	184	E	*	None	REVERSE TRANSCRIPTASES	None	Predicted protein	None	None
chromosome_2	53152506	-	C	T	Sb02g021480	1	624	386	129	W	*	None	CARTENOID OXYGENASE	None	similar to Putative Lignostilbene-alpha,beta-dioxygenase and related enzymes	None	None
chromosome_2	53449508	+	C	T	Sb02g021510	0	130	130	44	R	*	None	None	None	Predicted protein	None	None
chromosome_2	53974256	-	G	T	Sb02g021800	1	1885	3071	1024	Y	*	Serine/threonine protein kinase	SERINE-THREONINE PROTEIN KINASE, PLANT-TYPE	D-mannose binding lectin|S-locus glycoprotein family|PAN-like domain|PAN domain|Protein tyrosine kinase|Protein kinase domain	similar to Putative uncharacterized protein	sugar binding,chitin binding	None
chromosome_2	54021776	-	G	A	Sb02g021835	0	1198	727	243	Q	*	None	None	None	Predicted protein	None	None
chromosome_2	54494258	+	G	A	Sb02g022084	2	9130	557	186	W	*	None	None	None	Predicted protein	None	None
chromosome_2	54533100	-	G	A	Sb02g022100	0	1731	1731	577	Q	*	Serine/threonine protein kinase	SERINE-THREONINE PROTEIN KINASE, PLANT-TYPE	Leucine rich repeat N-terminal domain|Leucine Rich Repeat|Leucine Rich Repeat|Leucine Rich Repeat|Leucine Rich Repeat|Leucine Rich Repeat|Leucine Rich Repeat|Leucine Rich Repeat|Leucine Rich Repeat|Leucine Rich Repeat|Leucine Rich Repeat|Leucine Rich Repeat|Leucine Rich Repeat|Leucine Rich Repeat|Leucine Rich Repeat|Leucine Rich Repeat|Leucine Rich Repeat|Leucine Rich Repeat|Leucine Rich Repeat|L…	similar to CLV1 receptor kinase-like	protein kinase activity,protein serine/threonine kinase activity,protein-tyrosine kinase activity,ATP binding,protein amino acid phosphorylation	Phosphotransferases with an alcohol group as acceptor.;\N;\N;\N;Sphingoglycolipid metabolism;Metabolism of Complex Lipids;METABOLIC,Phosphotransferases with an alcohol group as acceptor.;\N;\N;\N;Benzoate degradation via CoA ligation;Biodegradation of Xenobiotics;METABOLIC,Phosphotransferases with an alcohol group as acceptor.;\N;\N;\N;Starch and sucrose metabolism;Metabolism of Complex Carbohydr…
chromosome_2	54557626	-	C	T	Sb02g022110	2	805	360	120	W	*	None	None	None	Predicted protein	None	None
chromosome_2	54619095	-	T	A	Sb02g022180	0	13146	4409	1470	R	*	None	LEUCINE-RICH REPEAT-CONTAINING PROTEIN	NB-ARC domain|Leucine Rich Repeat|Leucine Rich Repeat|Leucine Rich Repeat|Leucine Rich Repeat|Leucine Rich Repeat|Leucine Rich Repeat|Domain of unknown function DUF220	weakly similar to Putative uncharacterized protein	ATP binding,apoptosis,defense response,defense response to pathogen	None
chromosome_2	54667133	+	G	A	Sb02g022200	1	165	117	39	W	*	None	None	None	Predicted protein	None	None
chromosome_2	54667173	+	C	T	Sb02g022200	0	205	157	53	Q	*	None	None	None	Predicted protein	None	None
chromosome_2	55219055	-	A	T	Sb02g022300	1	62	62	21	Y	*	None	CYTOCHROME B5	Cytochrome b5-like Heme/Steroid binding domain	similar to Cytochrome b5-like	None	None
chromosome_2	55332716	-	A	T	Sb02g022340	2	978	978	326	L	*	Serine/threonine protein kinase	SERINE-THREONINE PROTEIN KINASE, PLANT-TYPE	Legume lectin domain|Protein kinase domain|Protein tyrosine kinase	similar to Os09g0334800 protein	protein kinase activity,protein serine/threonine kinase activity,protein-tyrosine kinase activity,ATP binding,protein amino acid phosphorylation	None
chromosome_2	55332774	-	G	A	Sb02g022340	0	920	920	307	Q	*	Serine/threonine protein kinase	SERINE-THREONINE PROTEIN KINASE, PLANT-TYPE	Legume lectin domain|Protein kinase domain|Protein tyrosine kinase	similar to Os09g0334800 protein	protein kinase activity,protein serine/threonine kinase activity,protein-tyrosine kinase activity,ATP binding,protein amino acid phosphorylation	None
chromosome_2	55333006	-	C	T	Sb02g022340	1	688	688	230	W	*	Serine/threonine protein kinase	SERINE-THREONINE PROTEIN KINASE, PLANT-TYPE	Legume lectin domain|Protein kinase domain|Protein tyrosine kinase	similar to Os09g0334800 protein	protein kinase activity,protein serine/threonine kinase activity,protein-tyrosine kinase activity,ATP binding,protein amino acid phosphorylation	None
chromosome_2	55381300	-	G	A	Sb02g022343	0	292	292	98	Q	*	None	HELICASE-RELATED	None	similar to Os04g0206200 protein	None	None
chromosome_2	55513357	+	C	A	Sb02g022440	2	699	608	203	S	*	None	None	Transferase family	similar to Putative uncharacterized protein	None	None
chromosome_2	55809507	-	C	A	Sb02g022650	0	261	261	87	G	*	Fibroblast/platelet-derived growth factor receptor and related receptor tyrosine kinases	SERINE-THREONINE PROTEIN KINASE, PLANT-TYPE	Leucine Rich Repeat|Leucine Rich Repeat|Protein kinase domain|Protein tyrosine kinase	similar to Putative OsD305	protein kinase activity,protein serine/threonine kinase activity,protein-tyrosine kinase activity,ATP binding,protein amino acid phosphorylation	None
chromosome_2	55811080	-	C	T	Sb02g022660	1	403	301	101	W	*	None	None	None	similar to Serine/threonine-specific receptor protein kinase-like	None	None
chromosome_2	55830496	+	C	A	Sb02g022680	1	2683	1806	602	Y	*	None	None	None	Predicted protein	None	None
chromosome_2	55867557	+	C	T	Sb02g022715	0	103	103	35	R	*	None	NON-LTR RETROELEMENT REVERSE TRANSCRIPTASE RELATED	None	Predicted protein	None	None
chromosome_2	55867716	+	C	T	Sb02g022715	0	262	262	88	Q	*	None	NON-LTR RETROELEMENT REVERSE TRANSCRIPTASE RELATED	None	Predicted protein	None	None
chromosome_2	55868186	+	C	T	Sb02g022715	0	732	649	217	Q	*	None	NON-LTR RETROELEMENT REVERSE TRANSCRIPTASE RELATED	None	Predicted protein	None	None
chromosome_2	55932210	+	G	A	Sb02g022720	2	1549	1475	492	W	*	None	None	Zinc knuckle|Zinc knuckle	Predicted protein	None	None
chromosome_2	55963716	-	G	A	Sb02g022740	0	2520	651	217	R	*	None	None	None	weakly similar to Os09g0356000 protein	None	None
chromosome_2	55965914	-	G	A	Sb02g022740	0	322	246	82	R	*	None	None	None	weakly similar to Os09g0356000 protein	None	None
chromosome_2	56114973	-	C	A	Sb02g022850	0	412	412	138	G	*	None	GENERAL TRANSCRIPTION FACTOR 2-RELATED ZINC FINGER PROTEIN	hAT family dimerisation domain	similar to Putative uncharacterized protein	protein dimerization activity	None
chromosome_2	56120534	+	C	T	Sb02g022855	0	109	109	37	Q	*	None	None	None	similar to Hypersensitive-induced response protein	None	None
chromosome_2	56120660	+	G	T	Sb02g022855	0	235	235	79	E	*	None	None	None	similar to Hypersensitive-induced response protein	None	None
chromosome_2	56178252	+	C	A	Sb02g022920	1	3197	1551	517	C	*	Isochorismate synthase	AMINOBENZOATE/ANTHRANILATE SYNTHASE	chorismate binding enzyme	similar to Putative uncharacterized protein	isochorismate synthase activity,biosynthesis	None
chromosome_2	56257366	+	G	A	Sb02g022970	1	2626	925	309	W	*	None	None	None	similar to Putative uncharacterized protein	None	None
chromosome_2	56326042	+	C	T	Sb02g023020	0	3009	2842	948	Q	*	None	None	SWIM zinc finger|Zinc knuckle	similar to OSJNBa0091C07.2 protein	nucleic acid binding	None
chromosome_2	56326162	+	C	T	Sb02g023020	0	3129	2962	988	Q	*	None	None	SWIM zinc finger|Zinc knuckle	similar to OSJNBa0091C07.2 protein	nucleic acid binding	None
chromosome_2	56326843	-	G	A	Sb02g023030	0	511	436	146	Q	*	None	None	GRF zinc finger	Predicted protein	zinc ion binding	None
chromosome_2	56350340	+	C	T	Sb02g023040	0	3835	1635	545	R	*	Uncharacterized conserved protein	UNCHARACTERIZED	Zinc finger C-x8-C-x5-C-x3-H type (and similar)|Zinc finger C-x8-C-x5-C-x3-H type (and similar)|Protein similar to CwfJ C-terminus 1|Protein similar to CwfJ C-terminus 2	similar to CwfJ / zinc finger(CCCH-type)-like protein	nucleic acid binding	None
chromosome_2	56396412	-	C	A	Sb02g023050	0	127	127	43	E	*	None	None	None	Predicted protein	None	None
chromosome_2	56412458	-	G	A	Sb02g023053	0	87	87	29	R	*	None	ZINC FINGER CCHC DOMAIN CONTAINING PROTEIN	Zinc knuckle|Zinc knuckle	Predicted protein	nucleic acid binding	None
chromosome_2	56432336	+	A	T	Sb02g023056	0	1110	913	305	K	*	None	None	None	Predicted protein	None	None
chromosome_2	56726339	+	G	A	Sb02g023190	2	951	80	27	W	*	None	None	None	Predicted protein	None	None
chromosome_2	56910674	-	G	A	Sb02g023290	0	2003	462	154	R	*	Putative cytochrome C oxidase assembly protein	SCO1/SENC	SCO1/SenC	similar to Putative uncharacterized protein	electron transport	None
chromosome_2	56965426	-	G	A	Sb02g023360	0	2575	1521	507	R	*	Sugar transporter/spinster transmembrane protein	DRUG TRANSPORTER-RELATED	Major Facilitator Superfamily	similar to Putative uncharacterized protein	transporter activity,transport,integral to membrane	None
chromosome_2	56965516	-	G	A	Sb02g023360	0	2485	1431	477	R	*	Sugar transporter/spinster transmembrane protein	DRUG TRANSPORTER-RELATED	Major Facilitator Superfamily	similar to Putative uncharacterized protein	transporter activity,transport,integral to membrane	None
chromosome_2	56965747	-	G	A	Sb02g023360	0	2254	1200	400	Q	*	Sugar transporter/spinster transmembrane protein	DRUG TRANSPORTER-RELATED	Major Facilitator Superfamily	similar to Putative uncharacterized protein	transporter activity,transport,integral to membrane	None
chromosome_2	56965822	-	G	A	Sb02g023360	0	2179	1125	375	Q	*	Sugar transporter/spinster transmembrane protein	DRUG TRANSPORTER-RELATED	Major Facilitator Superfamily	similar to Putative uncharacterized protein	transporter activity,transport,integral to membrane	None
chromosome_2	56979132	-	G	T	Sb02g023380	2	605	426	142	S	*	Sugar transporter/spinster transmembrane protein	DRUG TRANSPORTER-RELATED	Major Facilitator Superfamily	similar to Os09g0371200 protein	transporter activity,transport,integral to membrane	None
chromosome_2	57146676	+	C	T	Sb02g023510	0	949	949	317	Q	*	None	None	Arabidopsis proteins of unknown function	similar to Leaf senescence protein-like	molecular function unknown	None
chromosome_2	57157869	-	G	A	Sb02g023530	0	391	391	131	R	*	None	None	None	similar to Putative calmodulin-binding protein	None	None
chromosome_2	57426611	-	G	A	Sb02g023620	0	3980	2289	763	R	*	None	None	K+ potassium transporter	similar to Potassium transporter	potassium ion transport,potassium ion transporter activity,membrane	None
chromosome_2	57429545	-	G	A	Sb02g023620	0	1046	558	186	Q	*	None	None	K+ potassium transporter	similar to Potassium transporter	potassium ion transport,potassium ion transporter activity,membrane	None
chromosome_2	57469428	+	C	T	Sb02g023634	0	2075	1795	599	Q	*	None	None	FAR1 family|SWIM zinc finger	similar to Putative uncharacterized protein	None	None
chromosome_2	57488009	-	C	T	Sb02g023638	2	1886	1217	406	W	*	None	None	None	Predicted protein	None	None
chromosome_2	57508373	-	G	T	Sb02g023655	1	102	102	34	C	*	None	None	B-box zinc finger	weakly similar to Putative uncharacterized protein	DNA binding,intracellular,zinc ion binding	None
chromosome_2	57534120	+	G	T	Sb02g023665	0	853	853	285	E	*	Tam3-transposase (Ac family)	None	Protein of unknown function, DUF1544|Protein of unknown function (DUF 659)|hAT family dimerisation domain	similar to Os05g0232800 protein	DNA binding,protein dimerization activity	None
chromosome_2	57534556	+	G	A	Sb02g023665	2	1289	1289	430	W	*	Tam3-transposase (Ac family)	None	Protein of unknown function, DUF1544|Protein of unknown function (DUF 659)|hAT family dimerisation domain	similar to Os05g0232800 protein	DNA binding,protein dimerization activity	None
chromosome_2	57608889	-	G	A	Sb02g023750	0	2798	753	251	R	*	Tam3-transposase (Ac family)	None	BED zinc finger|hAT family dimerisation domain	weakly similar to Putative uncharacterized protein	DNA binding,protein dimerization activity	None
chromosome_2	57629947	+	T	A	Sb02g023755	1	483	249	83	C	*	None	None	None	similar to Putative uncharacterized protein	None	None
chromosome_2	57678493	-	C	A	Sb02g023780	0	2230	1129	377	E	*	None	None	None	weakly similar to Putative uncharacterized protein	None	None
chromosome_2	57757349	+	G	A	Sb02g023860	2	206	206	69	W	*	None	None	Protein of unknown function (DUF295)	Predicted protein	None	None
chromosome_2	57802028	-	C	T	Sb02g023895	1	849	849	283	W	*	None	None	None	similar to Putative transposase protein	extracellular region	None
chromosome_2	57900025	+	C	T	Sb02g023950	0	19	19	7	R	*	None	None	None	Predicted protein	None	None
chromosome_2	57900941	+	C	T	Sb02g023950	0	935	265	89	Q	*	None	None	None	Predicted protein	None	None
chromosome_2	57901301	+	C	T	Sb02g023950	0	1295	625	209	Q	*	None	None	None	Predicted protein	None	None
chromosome_2	58131061	-	G	A	Sb02g024110	0	45	45	15	Q	*	None	None	None	similar to Os09g0395300 protein	None	None
chromosome_2	58409078	-	G	T	Sb02g024220	2	1499	873	291	S	*	Alcohol dehydrogenase, class V	ALCOHOL DEHYDROGENASE RELATED	Alcohol dehydrogenase GroES-like domain|Zinc-binding dehydrogenase	similar to Os09g0400300 protein	zinc ion binding,oxidoreductase activity	None
chromosome_2	58564459	-	C	T	Sb02g024300	1	3931	2606	869	W	*	Phosphatidylinositol-4-phosphate 5-kinase and related FYVE finger-containing proteins	PHOSPHATIDYLINOSITOL-4-PHOSPHATE 5-KINASE	Phosphatidylinositol-4-phosphate 5-Kinase	similar to Putative uncharacterized protein	protein binding,ATP binding,1-phosphatidylinositol-4-phosphate 5-kinase activity,cellular protein metabolism	1-phosphatidylinositol-4-phosphate kinase.;ATP + 1-phosphatidyl-1D-myo-inositol 4-monophosphate = ADP + 1-phosphatidyl-1D-myo-inositol 4,5-bisphosphate.;\N;\N;Inositol phosphate metabolism;Metabolism of Complex Lipids;METABOLIC
chromosome_2	58567215	-	G	A	Sb02g024300	0	1175	865	289	Q	*	Phosphatidylinositol-4-phosphate 5-kinase and related FYVE finger-containing proteins	PHOSPHATIDYLINOSITOL-4-PHOSPHATE 5-KINASE	Phosphatidylinositol-4-phosphate 5-Kinase	similar to Putative uncharacterized protein	protein binding,ATP binding,1-phosphatidylinositol-4-phosphate 5-kinase activity,cellular protein metabolism	1-phosphatidylinositol-4-phosphate kinase.;ATP + 1-phosphatidyl-1D-myo-inositol 4-monophosphate = ADP + 1-phosphatidyl-1D-myo-inositol 4,5-bisphosphate.;\N;\N;Inositol phosphate metabolism;Metabolism of Complex Lipids;METABOLIC
chromosome_2	58599363	+	C	T	Sb02g024310	0	384	297	99	Q	*	Serine/threonine protein kinase	SERINE-THREONINE PROTEIN KINASE, PLANT-TYPE	Protein kinase domain|Protein tyrosine kinase|U-box domain	similar to U-box domain containing protein, expressed	ubiquitin ligase complex,protein kinase activity,protein serine/threonine kinase activity,protein-tyrosine kinase activity,ubiquitin-protein ligase activity,ATP binding,protein amino acid phosphorylation,metabolism,oxidoreductase activity,protein ubiquitination	None
chromosome_2	58686051	+	C	A	Sb02g024390	1	351	351	117	Y	*	Serine/threonine protein kinase	SERINE-THREONINE PROTEIN KINASE, PLANT-TYPE	Protein kinase domain|Protein tyrosine kinase	similar to Chromosome chr1 scaffold_5, whole genome shotgun sequence	protein kinase activity,protein serine/threonine kinase activity,protein-tyrosine kinase activity,ATP binding,protein amino acid phosphorylation	None
chromosome_2	58690119	+	C	T	Sb02g024390	0	4419	633	211	R	*	Serine/threonine protein kinase	SERINE-THREONINE PROTEIN KINASE, PLANT-TYPE	Protein kinase domain|Protein tyrosine kinase	similar to Chromosome chr1 scaffold_5, whole genome shotgun sequence	protein kinase activity,protein serine/threonine kinase activity,protein-tyrosine kinase activity,ATP binding,protein amino acid phosphorylation	None
chromosome_2	58726434	-	G	A	Sb02g024420	0	2261	549	183	R	*	None	None	None	similar to Putative uncharacterized protein	None	None
chromosome_2	58741482	+	G	A	Sb02g024427	2	1673	1673	558	W	*	None	GAG-POL-RELATED RETROTRANSPOSON	Retrotransposon gag protein|Integrase core domain|Reverse transcriptase (RNA-dependent DNA polymerase)	weakly similar to Os08g0176000 protein	DNA binding,DNA recombination	None
chromosome_2	59084137	+	G	A	Sb02g024630	1	5996	1042	348	W	*	Predicted hydrolase/acyltransferase (alpha/beta hydrolase superfamily)	None	alpha/beta hydrolase fold	similar to Putative uncharacterized protein	None	None
chromosome_2	59163182	+	G	A	Sb02g024670	2	2631	1740	580	W	*	None	None	Putative methyltransferase|Methyltransferase domain	similar to Dehydration-responsive protein-like	molecular function unknown,methyltransferase activity	None
chromosome_2	59222055	+	C	A	Sb02g024730	1	702	504	168	Y	*	mRNA deadenylase subunit	CCR4-ASSOCIATED FACTOR	CAF1 family ribonuclease	similar to Putative uncharacterized protein	nucleus,negative regulation of transcription,transcriptional repressor activity	None
chromosome_2	59434239	+	C	T	Sb02g024790	0	2560	2104	702	Q	*	None	None	Zinc knuckle	Predicted protein	nucleic acid binding	None
chromosome_2	59601332	-	G	C	Sb02g024910	2	848	327	109	S	*	Phospholipase D1	PHOSPHOLIPASE D	Phospholipase D Active site motif|Phospholipase D Active site motif	similar to Phospholipase D lambda	rhodopsin-like receptor activity,catalytic activity,phospholipase D activity,calcium ion binding,G-protein coupled receptor protein signaling pathway,metabolism,membrane,integral to membrane,phosphatidylcholine metabolism	Phospholipase D.;A phosphatidylcholine + H(2)O = choline + a phosphatidate.;\N;\N;Phospholipid degradation;Metabolism of Complex Lipids;METABOLIC,Phospholipase D.;A phosphatidylcholine + H(2)O = choline + a phosphatidate.;\N;\N;Glycerolipid metabolism;Metabolism of Complex Lipids;METABOLIC
chromosome_2	59618589	+	A	T	Sb02g024940	0	205	205	69	R	*	None	None	None	similar to Os08g0419800 protein	None	None
chromosome_2	59633185	-	G	A	Sb02g024960	0	231	231	77	R	*	None	FAMILY NOT NAMED	Zinc finger, C2H2 type|Zinc finger, C2H2 type|Zinc finger, C2H2 type|Zinc finger, C2H2 type|Zinc finger, C2H2 type|Zinc finger, C2H2 type	Predicted protein	nucleic acid binding,nucleus,zinc ion binding	None
chromosome_2	59707819	+	C	T	Sb02g025020	0	641	393	131	R	*	None	SUBFAMILY NOT NAMED	PHD-finger|Cellulose synthase	similar to Cellulose synthase catalytic subunit 12	ubiquitin ligase complex,ubiquitin-protein ligase activity,zinc ion binding,membrane,protein ubiquitination,cellulose synthase (UDP-forming) activity,cellulose biosynthesis	None
chromosome_2	59864641	-	C	T	Sb02g025140	1	4357	2142	714	W	*	None	None	None	weakly similar to Putative uncharacterized protein	None	None
chromosome_2	59864642	-	C	T	Sb02g025140	2	4356	2141	714	W	*	None	None	None	weakly similar to Putative uncharacterized protein	None	None
chromosome_2	59912543	-	T	A	Sb02g025190	0	1157	806	269	K	*	None	None	Integral membrane protein DUF6|Integral membrane protein DUF6	similar to Putative MtN21	None	None
chromosome_2	60036247	-	C	T	Sb02g025280	1	1832	361	121	W	*	None	IONOTROPIC GLUTAMATE RECEPTOR-RELATED	None	similar to Putative uncharacterized protein	ionotropic glutamate receptor activity,transporter activity,glutamate-gated ion channel activity,transport,membrane,periplasmic space (sensu Gram-negative Bacteria)	None
chromosome_2	60089937	-	C	A	Sb02g025320	0	5918	2425	809	E	*	Glutamate-gated kainate-type ion channel receptor subunit GluR5 and related subunits	IONOTROPIC GLUTAMATE RECEPTOR-RELATED	Receptor family ligand binding region|Ligand-gated ion channel	weakly similar to Chromosome undetermined scaffold_107, whole genome shotgun sequence	ionotropic glutamate receptor activity,glutamate-gated ion channel activity,membrane	None
chromosome_2	60504807	-	G	A	Sb02g025552	0	1510	948	316	Q	*	None	SENTRIN/SUMO-SPECIFIC PROTEASE	None	Predicted protein	proteolysis and peptidolysis,cysteine-type peptidase activity	None
chromosome_2	60505345	-	C	T	Sb02g025552	1	972	610	204	W	*	None	SENTRIN/SUMO-SPECIFIC PROTEASE	None	Predicted protein	proteolysis and peptidolysis,cysteine-type peptidase activity	None
chromosome_2	60530220	-	C	A	Sb02g025566	0	1348	1348	450	E	*	None	ARIADNE RING ZINC FINGER	IBR domain	Predicted protein	ubiquitin ligase complex,ubiquitin-protein ligase activity,zinc ion binding,protein ubiquitination	None
chromosome_2	60566635	+	C	T	Sb02g025600	0	244	244	82	R	*	None	NON-LTR RETROELEMENT REVERSE TRANSCRIPTASE RELATED	None	weakly similar to Os07g0115700 protein	None	None
chromosome_2	60900550	+	G	A	Sb02g025870	1	2073	1371	457	W	*	None	None	SWIM zinc finger	similar to Putative uncharacterized protein OSJNBb0007E22.22	None	None
chromosome_2	60903466	-	C	A	Sb02g025880	0	1491	763	255	E	*	None	None	None	Predicted protein	None	None
chromosome_2	61285626	+	C	G	Sb02g026183	2	242	242	81	S	*	None	None	None	similar to OSIGBa0159H11-OSIGBa0137A07.1 protein	None	None
chromosome_2	61375789	-	C	A	Sb02g026235	0	1050	351	117	E	*	None	None	None	similar to Putative uncharacterized protein	None	None
chromosome_2	61376565	-	G	C	Sb02g026235	1	274	274	92	Y	*	None	None	None	similar to Putative uncharacterized protein	None	None
chromosome_2	61376812	-	A	C	Sb02g026235	2	27	27	9	L	*	None	None	None	similar to Putative uncharacterized protein	None	None
chromosome_2	61505360	-	G	A	Sb02g026420	0	974	576	192	Q	*	Predicted serine protease	PROTEASE FAMILY S9A OLIGOPEPTIDASE	Prolyl oligopeptidase, N-terminal beta-propeller domain|Prolyl oligopeptidase family	similar to Putative uncharacterized protein	catalytic activity,serine-type endopeptidase activity,prolyl oligopeptidase activity,proteolysis and peptidolysis,serine-type peptidase activity	Oligopeptidase B.;Hydrolysis of Arg-|-Xaa and Lys-|-Xaa bonds in oligopeptides, even when P1' residue is proline.;\N;\N;\N;\N;\N
chromosome_2	61590270	+	C	T	Sb02g026496	0	154	154	52	Q	*	None	TRANSPOSASE-LIKE PROTEIN	None	similar to Os01g0293600 protein	None	None
chromosome_2	61676000	-	C	T	Sb02g026550	1	4199	1873	625	W	*	Arylacetamide deacetylase	MEMBER OF 'GDXG' FAMILY OF LIPOLYTIC ENZYMES	alpha/beta hydrolase fold|alpha/beta hydrolase fold	similar to Putative uncharacterized protein	catalytic activity	None
chromosome_2	61676311	-	G	A	Sb02g026550	0	3888	1562	521	Q	*	Arylacetamide deacetylase	MEMBER OF 'GDXG' FAMILY OF LIPOLYTIC ENZYMES	alpha/beta hydrolase fold|alpha/beta hydrolase fold	similar to Putative uncharacterized protein	catalytic activity	None
chromosome_2	61936576	+	G	A	Sb02g026730	1	12844	1527	509	W	*	15-hydroxyprostaglandin dehydrogenase and related dehydrogenases	ALCOHOL DEHYDROGENASE RELATED	short chain dehydrogenase|Alcohol dehydrogenase GroES-like domain|Zinc-binding dehydrogenase	similar to Putative uncharacterized protein	metabolism,zinc ion binding,oxidoreductase activity	None
chromosome_2	61993893	+	T	A	Sb02g026811	1	189	189	63	Y	*	None	ATP SYNTHASE	None	similar to ATP synthase subunit alpha	None	None
chromosome_2	62170861	+	G	T	Sb02g026940	0	103	103	35	G	*	None	None	None	weakly similar to Putative transposon protein	None	None
chromosome_2	62170921	+	G	T	Sb02g026940	0	163	163	55	E	*	None	None	None	weakly similar to Putative transposon protein	None	None
chromosome_2	62176720	+	C	T	Sb02g026950	0	307	196	66	R	*	None	None	None	weakly similar to Transposon protein, putative, CACTA, En/Spm sub-class	None	None
chromosome_2	62176916	+	G	A	Sb02g026950	2	503	392	131	W	*	None	None	None	weakly similar to Transposon protein, putative, CACTA, En/Spm sub-class	None	None
chromosome_2	62193736	+	C	T	Sb02g026960	0	372	301	101	R	*	None	None	None	Predicted protein	None	None
chromosome_2	62194316	+	C	A	Sb02g026960	1	952	639	213	Y	*	None	None	None	Predicted protein	None	None
chromosome_2	62402591	-	G	A	Sb02g027200	0	115	109	37	Q	*	None	RING FINGER AND PROTEASE ASSOCIATED DOMAIN-CONTAINING	Zinc finger, C3HC4 type (RING finger)	similar to RING-H2 zinc finger protein ATL6-like	ubiquitin ligase complex,ubiquitin-protein ligase activity,zinc ion binding,protein ubiquitination	None
chromosome_2	62636615	-	G	A	Sb02g027390	0	12158	2278	760	Q	*	None	PENTATRICOPEPTIDE REPEAT-CONTAINING PROTEIN	PPR repeat|PPR repeat|PPR repeat|PPR repeat|PPR repeat|PPR repeat	similar to Putative uncharacterized protein	None	None
chromosome_2	62826121	-	G	A	Sb02g027540	0	949	543	181	Q	*	Acyl-CoA reductase	MALE STERILITY PROTEIN 2-RELATED	Male sterility protein	similar to Putative fatty acyl-CoA reductase	None	None
chromosome_2	62858938	-	C	T	Sb02g027570	2	1849	285	95	W	*	None	None	Cellulose synthase	similar to Cellulose synthase-like protein OsCslE1	metabolism,membrane,oxidoreductase activity,cellulose synthase (UDP-forming) activity,cellulose biosynthesis	None
chromosome_2	62890297	+	C	A	Sb02g027600	1	1417	999	333	Y	*	Serine carboxypeptidases (lysosomal cathepsin A)	SERINE PROTEASE FAMILY S10 SERINE CARBOXYPEPTIDASE	Serine carboxypeptidase	similar to Putative serine carboxypeptidase	catalytic activity,serine carboxypeptidase activity,proteolysis and peptidolysis	Carboxypeptidase D.;Preferential release of a C-terminal arginine or lysine residue.;\N;\N;\N;\N;\N
chromosome_2	62961357	+	G	T	Sb02g027685	0	73	37	13	E	*	None	None	F-box domain	Predicted protein	None	None
chromosome_2	62999697	+	C	G	Sb02g027710	1	2715	2715	905	Y	*	Serine/threonine protein kinase	SERINE-THREONINE PROTEIN KINASE, PLANT-TYPE	Leucine rich repeat N-terminal domain|Leucine Rich Repeat|Leucine Rich Repeat|Leucine Rich Repeat|Leucine Rich Repeat|Leucine Rich Repeat|Leucine Rich Repeat|Leucine Rich Repeat|Leucine Rich Repeat|Leucine Rich Repeat|Leucine Rich Repeat|Leucine Rich Repeat|Leucine Rich Repeat|Leucine Rich Repeat|Leucine Rich Repeat|Leucine Rich Repeat|Leucine Rich Repeat|Leucine Rich Repeat|Leucine Rich Repeat|L…	similar to CLAVATA-like kinase	protein kinase activity,protein serine/threonine kinase activity,protein-tyrosine kinase activity,ATP binding,protein amino acid phosphorylation	None
chromosome_2	63007277	-	G	A	Sb02g027720	0	928	639	213	Q	*	None	PHENYLALANYL-TRNA SYNTHETASE -RELATED	None	similar to Putative uncharacterized protein	None	None
chromosome_2	63051194	+	C	A	Sb02g027780	2	5584	1067	356	S	*	Uncharacterized conserved protein	None	None	Predicted protein	carboxypeptidase A activity,cysteine-type endopeptidase activity,proteolysis and peptidolysis	None
chromosome_2	63166462	+	C	T	Sb02g027880	0	691	186	62	R	*	Phosphatidylinositol transfer protein SEC14 and related proteins	SEC14 RELATED PROTEIN	CRAL/TRIO, N-terminus|CRAL/TRIO domain	similar to Putative phosphatidylinositol transfer-like protein II|	transporter activity,intracellular,transport	None
chromosome_2	63176758	-	G	A	Sb02g027920	0	2732	1485	495	R	*	Actin filament-coating protein tropomyosin	None	None	similar to Putative uncharacterized protein	None	None
chromosome_2	63292289	-	G	T	Sb02g028080	2	305	305	102	S	*	BPI/LBP/CETP family protein	BACTERICIDAL PERMEABILITY-INCREASING (BPI) PROTEIN	LBP / BPI / CETP family, N-terminal domain|LBP / BPI / CETP family, C-terminal domain	similar to Putative uncharacterized protein	lipid binding	None
chromosome_2	63310490	+	G	T	Sb02g028090	0	7712	856	286	E	*	None	None	Protein of unknown function (DUF1664)	similar to Putative uncharacterized protein	None	None
chromosome_2	63436363	+	C	A	Sb02g028240	2	477	185	62	S	*	Predicted Zn-finger protein	PRK1-ASSOCIATED ZINC FINGER PROTEIN	A20-like zinc finger|AN1-like Zinc finger	similar to Zinc finger A20 and AN1 domain-containing stress-associated protein 1	DNA binding,molecular function unknown,zinc ion binding	None
chromosome_2	63585983	-	C	T	Sb02g028400	2	2223	1275	425	W	*	Beta-glucosidase, lactase phlorizinhydrolase, and related proteins	GLYCOSIDE HYDROLASES	Glycosyl hydrolase family 1	similar to Os09g0491100 protein	hydrolase activity, hydrolyzing O-glycosyl compounds,carbohydrate metabolism	None
chromosome_2	63694263	-	A	T	Sb02g028550	2	2479	1725	575	L	*	Protein kinase PCTAIRE and related kinases	SERINE-THREONINE PROTEIN KINASE, PLANT-TYPE	Calcium binding EGF domain|Protein kinase domain	similar to Putative wall-associated serine/threonine kinase	protein kinase activity,protein serine/threonine kinase activity,protein-tyrosine kinase activity,calcium ion binding,ATP binding,protein amino acid phosphorylation	None
chromosome_2	63799178	-	G	A	Sb02g028620	0	3315	630	210	R	*	Flavonol reductase/cinnamoyl-CoA reductase	NAD DEPENDENT EPIMERASE/DEHYDRATASE	None	similar to Putative uncharacterized protein	None	None
chromosome_2	63900139	-	C	T	Sb02g028750	1	1206	1061	354	W	*	None	None	No apical meristem (NAM) protein	similar to Os09g0493700 protein	None	None
chromosome_2	64037127	+	C	T	Sb02g028930	0	196	196	66	R	*	None	None	FAR1 family	similar to Putative far-red impaired response protein	None	None
chromosome_2	64037223	+	C	T	Sb02g028930	0	292	292	98	Q	*	None	None	FAR1 family	similar to Putative far-red impaired response protein	None	None
chromosome_2	64037862	+	C	T	Sb02g028930	0	931	931	311	Q	*	None	None	FAR1 family	similar to Putative far-red impaired response protein	None	None
chromosome_2	64075848	-	G	A	Sb02g028945	0	392	310	104	Q	*	None	None	None	Predicted protein	None	None
chromosome_2	64245833	-	G	A	Sb02g029080	0	524	387	129	R	*	None	None	Glycosyl hydrolases family 17|X8 domain	similar to Os09g0502200 protein	hydrolase activity, hydrolyzing O-glycosyl compounds,carbohydrate metabolism	None
chromosome_2	64520851	-	G	T	Sb02g029430	2	1195	659	220	S	*	Multitransmembrane protein	STROMAL CELL PROTEIN/NODULIN MTN3-RELATED	MtN3/saliva family|MtN3/saliva family	similar to Putative uncharacterized protein	molecular function unknown,membrane	None
chromosome_2	64669016	+	C	A	Sb02g029570	1	423	423	141	Y	*	None	None	None	weakly similar to Putative uncharacterized protein	None	None
chromosome_2	64724364	+	C	T	Sb02g029625	0	388	307	103	Q	*	None	None	None	Predicted protein	None	None
chromosome_2	64825053	+	C	T	Sb02g029730	0	2575	1974	658	Q	*	Serine/threonine protein kinase	SERINE-THREONINE PROTEIN KINASE, PLANT-TYPE	Protein tyrosine kinase|Protein kinase domain	similar to Putative Pti1-like kinase	protein kinase activity,protein serine/threonine kinase activity,protein-tyrosine kinase activity,ATP binding,protein amino acid phosphorylation	None
chromosome_2	64839138	-	G	A	Sb02g029770	0	522	516	172	R	*	None	CALCIUM/CALMODULIN-DEPENDENT PROTEIN KINASE-RELATED	None	weakly similar to Putative uncharacterized protein	protein kinase activity,protein serine/threonine kinase activity,ATP binding,protein amino acid phosphorylation	None
chromosome_2	64956627	-	G	T	Sb02g029870	1	1753	649	217	C	*	None	gb def: Transcription factor HY5 (LONG HYPOCOL5 protein) (AtbZIP56)	Basic region leucine zipper|bZIP transcription factor	similar to Transcription factor RF2a	DNA binding,nucleus,regulation of transcription, DNA-dependent	None
chromosome_2	64977036	-	C	T	Sb02g029900	2	2515	613	205	W	*	Glyoxylase	BETA LACTAMASE DOMAIN	Metallo-beta-lactamase superfamily	similar to Glyoxalase II	metabolism	None
chromosome_2	64981498	-	T	A	Sb02g029910	0	4140	1826	609	R	*	None	None	Plant protein of unknown function (DUF936)	similar to Putative uncharacterized protein OJ1211_G06.22	nucleic acid binding	None
chromosome_2	65069662	+	C	T	Sb02g029980	0	100	100	34	Q	*	None	None	None	similar to Putative uncharacterized protein	None	None
chromosome_2	65136694	-	C	A	Sb02g030040	0	508	508	170	E	*	UDP-glucuronosyl and UDP-glucosyl transferase	GLUCOSYL/GLUCURONOSYL TRANSFERASES	None	similar to Putative uncharacterized protein	electron transporter activity,electron transport,metabolism,transferase activity, transferring hexosyl groups	Limonoid glucosyltransferase.;UDP-glucose + limonin = glucosyl-limonin + UDP.;\N;\N;\N;\N;\N
chromosome_2	65156746	+	C	A	Sb02g030050	1	660	591	197	Y	*	UDP-glucuronosyl and UDP-glucosyl transferase	GLUCOSYL/GLUCURONOSYL TRANSFERASES	None	similar to Putative uncharacterized protein	metabolism,transferase activity, transferring hexosyl groups	None
chromosome_2	65166621	+	C	A	Sb02g030070	1	1878	626	209	C	*	26S proteasome regulatory complex, subunit PSMD10	ANKYRIN REPEAT-CONTAINING	Ankyrin repeat|Ankyrin repeat|Ankyrin repeat|Ankyrin repeat|Ankyrin repeat|Ankyrin repeat|Ankyrin repeat	similar to Ankyrin-like protein	None	None
chromosome_2	65170828	-	G	A	Sb02g030080	0	465	207	69	R	*	None	None	None	similar to Putative uncharacterized protein	None	None
chromosome_2	65256652	-	C	A	Sb02g030130	0	2049	1338	446	G	*	None	None	None	weakly similar to Putative uncharacterized protein	None	None
chromosome_2	65258328	-	G	T	Sb02g030130	1	373	373	125	C	*	None	None	None	weakly similar to Putative uncharacterized protein	None	None
chromosome_2	65258486	-	G	A	Sb02g030130	0	215	215	72	Q	*	None	None	None	weakly similar to Putative uncharacterized protein	None	None
chromosome_2	65273185	+	C	T	Sb02g030150	0	1251	293	98	R	*	Predicted hydrolase/acyltransferase (alpha/beta hydrolase superfamily)	ALPHA/BETA HYDROLASE RELATED	alpha/beta hydrolase fold	similar to T19F6.4 protein	catalytic activity,aromatic compound metabolism,hydrolase activity	Acting on ester bonds.;\N;\N;\N;\N;\N;\N
chromosome_2	65337563	+	G	A	Sb02g030250	1	2482	372	124	W	*	None	None	None	similar to Long-chain fatty acid condensing enzyme	None	None
chromosome_2	65362772	+	G	T	Sb02g030290	0	669	391	131	E	*	None	XP-G/RAD2 DNA REPAIR ENDONUCLEASE FAMILY	XPG N-terminal domain|XPG I-region	similar to Single strand DNA repair-like protein	DNA binding,nuclease activity,DNA repair	Hydrolases.;\N;\N;\N;\N;\N;\N
chromosome_2	65385958	-	T	A	Sb02g030320	0	127	127	43	K	*	None	None	AP2 domain	similar to SbCBF6	transcription factor activity,nucleus,regulation of transcription, DNA-dependent	None
chromosome_2	65565305	-	G	A	Sb02g030510	0	1930	735	245	R	*	None	None	NC domain	similar to NC domain-containing protein	None	None
chromosome_2	65739528	+	C	A	Sb02g030720	1	585	528	176	Y	*	Cytochrome P450 CYP2 subfamily	CYTOCHROME P450	Cytochrome P450	similar to Putative Cytochrome P450	monooxygenase activity,electron transport	Acting on paired donors, with incorporation or reduction of;\N;\N;\N;gamma-Hexachlorocyclohexane degradation;Biodegradation of Xenobiotics;METABOLIC,Acting on paired donors, with incorporation or reduction of;\N;\N;\N;Ascorbate and aldarate metabolism;Carbohydrate Metabolism;METABOLIC,Acting on paired donors, with incorporation or reduction of;\N;\N;\N;Flavonoids, stilbene and lignin biosynthesis…
chromosome_2	65759415	+	C	T	Sb02g030760	0	1121	501	167	Q	*	None	SUBTILISIN/KEXIN-RELATED SERINE PROTEASE	Subtilisin N-terminal Region|Subtilase family|PA domain	similar to Os09g0530800 protein	subtilase activity,proteolysis and peptidolysis,peptidase activity,protein self binding,negative regulation of enzyme activity	None
chromosome_2	65760028	+	C	G	Sb02g030760	2	1734	975	325	S	*	None	SUBTILISIN/KEXIN-RELATED SERINE PROTEASE	Subtilisin N-terminal Region|Subtilase family|PA domain	similar to Os09g0530800 protein	subtilase activity,proteolysis and peptidolysis,peptidase activity,protein self binding,negative regulation of enzyme activity	None
chromosome_2	65760505	+	G	T	Sb02g030760	0	2211	1286	429	E	*	None	SUBTILISIN/KEXIN-RELATED SERINE PROTEASE	Subtilisin N-terminal Region|Subtilase family|PA domain	similar to Os09g0530800 protein	subtilase activity,proteolysis and peptidolysis,peptidase activity,protein self binding,negative regulation of enzyme activity	None
chromosome_2	65859054	-	G	C	Sb02g030865	2	713	631	211	S	*	None	None	FAR1 family	similar to Os08g0143800 protein	None	None
chromosome_2	65924157	+	T	A	Sb02g030920	2	5154	1632	544	L	*	Pantothenate kinase PanK and related proteins	PANTOTHENATE KINASE	Fumble	similar to Putative uncharacterized protein	pantothenate kinase activity,ATP binding,coenzyme A biosynthesis	Pantothenate kinase.;ATP + pantothenate = ADP + D-4'-phosphopantothenate.;\N;\N;Pantothenate and CoA biosynthesis;Metabolism of Cofactors and Vitamins;METABOLIC
chromosome_2	66013731	-	T	A	Sb02g030996	0	88	88	30	R	*	None	SUBFAMILY NOT NAMED	None	similar to Putative uncharacterized protein	None	None
chromosome_2	66013763	-	C	T	Sb02g030996	2	56	56	19	W	*	None	SUBFAMILY NOT NAMED	None	similar to Putative uncharacterized protein	None	None
chromosome_2	66058922	+	G	T	Sb02g031050	0	510	421	141	E	*	Anaphase-promoting complex (APC), subunit 11	ARKADIA-RELATED	Zinc finger, C3HC4 type (RING finger)	similar to Putative uncharacterized protein	ubiquitin ligase complex,ubiquitin-protein ligase activity,zinc ion binding,protein ubiquitination	None
chromosome_2	66064162	-	G	T	Sb02g031053	2	116	116	39	S	*	None	None	None	Predicted protein	None	None
chromosome_2	66143954	-	G	T	Sb02g031160	1	1332	156	52	Y	*	Ribonuclease, T2 family	RIBONUCLEASE T2	Ribonuclease T2 family	similar to RNase S-like protein	RNA binding,endoribonuclease activity	Ribonuclease T2.;Two-stage endonucleolytic cleavage to 3'-phosphomononucleotides and 3'-phosphooligonucleotides with 2',3'-cyclic phosphate intermediates.;\N;\N;\N;\N;\N
chromosome_2	66417147	+	C	T	Sb02g031490	0	2505	1325	442	R	*	None	UNCHARACTERIZED	Protein of unknown function (DUF630)|Protein of unknown function (DUF632)	similar to Bzip-like transcription factor-like protein	None	None
chromosome_2	66475876	-	A	T	Sb02g031560	1	1525	1017	339	Y	*	Ornithine decarboxylase	ARGININE/DIAMINOPIMELATE/ORNITHINE DECARBOXYLASE	Pyridoxal-dependent decarboxylase, pyridoxal binding domain|Pyridoxal-dependent decarboxylase, C-terminal sheet domain	similar to Putative ornithine decarboxylase	catalytic activity,polyamine biosynthesis	Ornithine decarboxylase.;L-ornithine = putrescine + CO(2).;Pyridoxal-phosphate.;\N;Urea cycle and metabolism of amino groups;Amino Acid Metabolism;METABOLIC,Ornithine decarboxylase.;L-ornithine = putrescine + CO(2).;Pyridoxal-phosphate.;\N;Arginine and proline metabolism;Amino Acid Metabolism;METABOLIC,Ornithine decarboxylase.;L-ornithine = putrescine + CO(2).;Pyridoxal-phosphate.;\N;Alkaloid bio…
chromosome_2	66541189	+	C	A	Sb02g031610	2	2465	881	294	S	*	Glutathione S-transferase	GLUTATHIONE S-TRANSFERASE, GST, SUPERFAMILY, GST DOMAIN CONTAINING	Glutathione S-transferase, C-terminal domain	Predicted protein	None	Glucan 1,4-alpha-glucosidase.;Hydrolysis of terminal 1,4-linked alpha-D-glucose residues successively from non-reducing ends of the chains with release of beta-D-glucose.;\N;\N;Starch and sucrose metabolism;Metabolism of Complex Carbohydrates;METABOLIC
chromosome_2	66546145	+	T	A	Sb02g031610	2	7421	5837	1946	L	*	Glutathione S-transferase	GLUTATHIONE S-TRANSFERASE, GST, SUPERFAMILY, GST DOMAIN CONTAINING	Glutathione S-transferase, C-terminal domain	Predicted protein	None	Glucan 1,4-alpha-glucosidase.;Hydrolysis of terminal 1,4-linked alpha-D-glucose residues successively from non-reducing ends of the chains with release of beta-D-glucose.;\N;\N;Starch and sucrose metabolism;Metabolism of Complex Carbohydrates;METABOLIC
chromosome_2	66548885	+	G	T	Sb02g031610	0	10161	8206	2736	E	*	Glutathione S-transferase	GLUTATHIONE S-TRANSFERASE, GST, SUPERFAMILY, GST DOMAIN CONTAINING	Glutathione S-transferase, C-terminal domain	Predicted protein	None	Glucan 1,4-alpha-glucosidase.;Hydrolysis of terminal 1,4-linked alpha-D-glucose residues successively from non-reducing ends of the chains with release of beta-D-glucose.;\N;\N;Starch and sucrose metabolism;Metabolism of Complex Carbohydrates;METABOLIC
chromosome_2	66609387	-	G	A	Sb02g031700	0	125	125	42	R	*	None	None	Auxin responsive protein|Auxin responsive protein	weakly similar to Putative uncharacterized protein	None	None
chromosome_2	66620887	-	G	A	Sb02g031750	0	1355	954	318	Q	*	None	None	None	weakly similar to Putative uncharacterized protein	None	None
chromosome_2	66633105	-	C	T	Sb02g031790	2	26	26	9	W	*	None	None	Auxin responsive protein	similar to Putative uncharacterized protein	None	None
chromosome_2	66648481	-	G	A	Sb02g031850	0	2071	903	301	Q	*	Spindle pole body protein	UNCHARACTERIZED DUF292	Eukaryotic protein of unknown function, DUF292	similar to Os09g0547200 protein	molecular function unknown	None
chromosome_2	66777063	-	G	A	Sb02g032020	0	4724	1152	384	Q	*	None	BROMODOMAIN CONTAINING PROTEIN	Bromodomain	similar to Putative uncharacterized protein P0489D11.5	None	Histone acetyltransferase.;Acetyl-CoA + histone = CoA + acetyl-histone.;\N;\N;\N;\N;\N
chromosome_2	66891582	-	G	A	Sb02g032120	0	2809	2061	687	R	*	Serine/threonine protein kinase	SERINE-THREONINE PROTEIN KINASE, PLANT-TYPE	D-mannose binding lectin|S-locus glycoprotein family|PAN-like domain|PAN domain|Protein kinase domain|Protein tyrosine kinase	similar to Os09g0551000 protein	protein kinase activity,protein serine/threonine kinase activity,protein-tyrosine kinase activity,ATP binding,sugar binding,protein amino acid phosphorylation,chitin binding	None
chromosome_2	66894268	-	G	A	Sb02g032120	0	123	123	41	R	*	Serine/threonine protein kinase	SERINE-THREONINE PROTEIN KINASE, PLANT-TYPE	D-mannose binding lectin|S-locus glycoprotein family|PAN-like domain|PAN domain|Protein kinase domain|Protein tyrosine kinase	similar to Os09g0551000 protein	protein kinase activity,protein serine/threonine kinase activity,protein-tyrosine kinase activity,ATP binding,sugar binding,protein amino acid phosphorylation,chitin binding	None
chromosome_2	67148982	-	G	A	Sb02g032400	0	3790	993	331	Q	*	None	ZINC FINGER PROTEIN	Zinc finger, C2H2 type|RS4NT (NUC023) domain|Zinc finger, C2H2 type|Zinc finger, C2H2 type	similar to INDETERMINATE-related protein 7	nucleic acid binding,nucleus,zinc ion binding	None
chromosome_2	67167157	-	G	T	Sb02g032410	2	58	58	20	S	*	None	ZINC FINGER PROTEIN	Zinc finger, C2H2 type|Zinc finger, C2H2 type|Zinc finger, C2H2 type	similar to INDETERMINATE-related protein 7	nucleic acid binding,nucleus,zinc ion binding	None
chromosome_2	67290141	+	T	A	Sb02g032540	1	135	135	45	C	*	None	None	Plastocyanin-like domain	similar to Putative uncharacterized protein	electron transporter activity,copper ion binding,electron transport	None
chromosome_2	67290174	+	T	A	Sb02g032540	1	168	168	56	Y	*	None	None	Plastocyanin-like domain	similar to Putative uncharacterized protein	electron transporter activity,copper ion binding,electron transport	None
chromosome_2	67360102	+	C	T	Sb02g032680	0	1208	414	138	R	*	None	None	None	similar to Putative uncharacterized protein	None	None
chromosome_2	67388305	-	A	T	Sb02g032725	1	2617	1490	497	Y	*	None	None	HEAT repeat|HEAT repeat|HEAT repeat|HEAT repeat|HEAT repeat	similar to Putative uncharacterized protein	None	None
chromosome_2	67433839	-	G	A	Sb02g032805	0	177	177	59	Q	*	None	None	X8 domain	similar to Putative uncharacterized protein	None	None
chromosome_2	67502848	-	G	T	Sb02g032885	1	3045	1668	556	Y	*	None	EUKARYOTIC TRANSLATION INITIATION FACTOR 2C	PAZ domain	Predicted protein	None	None
chromosome_2	67551627	+	G	T	Sb02g032960	0	3486	2148	716	G	*	MEKK and related serine/threonine protein kinases	IRE1-RELATED	Protein kinase domain|Protein tyrosine kinase|Ribonuclease 2-5A	similar to OsIre1p	protein kinase activity,protein serine/threonine kinase activity,protein-tyrosine kinase activity,ATP binding,mRNA processing,protein amino acid phosphorylation,endoribonuclease activity, producing 5'-phosphomonoesters	Protein kinase.;ATP + a protein = ADP + a phosphoprotein.;\N;\N;\N;\N;\N
chromosome_2	67565342	+	G	A	Sb02g032980	2	1333	1140	380	W	*	Translation initiation factor 2C (eIF-2C) and related proteins	EUKARYOTIC TRANSLATION INITIATION FACTOR 2C	PAZ domain|Piwi domain	weakly similar to OSJNBa0005N02.3 protein	None	None
chromosome_2	67651724	-	G	A	Sb02g033010	0	1233	1233	411	Q	*	None	PENTATRICOPEPTIDE REPEAT-CONTAINING PROTEIN	PPR repeat|PPR repeat|PPR repeat|PPR repeat|PPR repeat|PPR repeat|PPR repeat|PPR repeat|PPR repeat|PPR repeat|PPR repeat|PPR repeat|PPR repeat|PPR repeat|PPR repeat	similar to Crp1-like protein	None	None
chromosome_2	67652732	-	G	A	Sb02g033010	0	225	225	75	R	*	None	PENTATRICOPEPTIDE REPEAT-CONTAINING PROTEIN	PPR repeat|PPR repeat|PPR repeat|PPR repeat|PPR repeat|PPR repeat|PPR repeat|PPR repeat|PPR repeat|PPR repeat|PPR repeat|PPR repeat|PPR repeat|PPR repeat|PPR repeat	similar to Crp1-like protein	None	None
chromosome_2	67652798	-	C	A	Sb02g033010	0	159	159	53	G	*	None	PENTATRICOPEPTIDE REPEAT-CONTAINING PROTEIN	PPR repeat|PPR repeat|PPR repeat|PPR repeat|PPR repeat|PPR repeat|PPR repeat|PPR repeat|PPR repeat|PPR repeat|PPR repeat|PPR repeat|PPR repeat|PPR repeat|PPR repeat	similar to Crp1-like protein	None	None
chromosome_2	67657471	-	C	A	Sb02g033020	0	222	222	74	E	*	None	None	None	similar to Putative uncharacterized protein	None	Exo-alpha-sialidase.;Hydrolysis of alpha-(2->3)-, alpha-(2->6)-, alpha-(2->8)-glycosidic linkages of terminal sialic residues in oligosaccharides, glycoproteins, glycolipids, colominic acid and synthetic substrates.;\N;Sialidosis; MIM:256550.;N-Glycan degradation;Metabolism of Complex Carbohydrates;METABOLIC,Exo-alpha-sialidase.;Hydrolysis of alpha-(2->3)-, alpha-(2->6)-, alpha-(2->8)-glycosidic …
chromosome_2	67686195	-	G	A	Sb02g033060	0	1025	624	208	R	*	None	None	None	similar to Os07g0475000 protein	None	None
chromosome_2	67891058	-	G	A	Sb02g033180	0	2708	321	107	Q	*	Vacuolar sorting protein VPS24	SNF7-RELATED	ESCRT-III complex subunit	similar to Putative uncharacterized protein	molecular function unknown	None
chromosome_2	67905961	-	C	T	Sb02g033210	1	1533	1051	351	W	*	Amidases	AMIDASE	Amidase	similar to OSIGBa0148J22.1 protein	amidase activity	Carbon--nitrogen ligases with glutamine as amido-N-donor.;\N;\N;\N;Glutamate metabolism;Amino Acid Metabolism;METABOLIC,Carbon--nitrogen ligases with glutamine as amido-N-donor.;\N;\N;\N;Alanine and aspartate metabolism;Amino Acid Metabolism;METABOLIC
chromosome_2	67905965	-	G	C	Sb02g033210	2	1529	1047	349	S	*	Amidases	AMIDASE	Amidase	similar to OSIGBa0148J22.1 protein	amidase activity	Carbon--nitrogen ligases with glutamine as amido-N-donor.;\N;\N;\N;Glutamate metabolism;Amino Acid Metabolism;METABOLIC,Carbon--nitrogen ligases with glutamine as amido-N-donor.;\N;\N;\N;Alanine and aspartate metabolism;Amino Acid Metabolism;METABOLIC
chromosome_2	67912759	+	C	T	Sb02g033220	0	1651	1028	343	Q	*	Amidases	AMIDASE	Amidase	similar to OSIGBa0148J22.1 protein	amidase activity	Carbon--nitrogen ligases with glutamine as amido-N-donor.;\N;\N;\N;Glutamate metabolism;Amino Acid Metabolism;METABOLIC,Carbon--nitrogen ligases with glutamine as amido-N-donor.;\N;\N;\N;Alanine and aspartate metabolism;Amino Acid Metabolism;METABOLIC
chromosome_2	68040954	-	A	C	Sb02g033390	1	7148	1450	484	Y	*	E3 ubiquitin ligase	SYNOVIOLIN-RELATED	PHD-finger|Zinc finger, C3HC4 type (RING finger)|CUE domain	similar to Putative zinc finger (C3HC4-type RING finger) protein	ubiquitin ligase complex,ubiquitin-protein ligase activity,zinc ion binding,protein ubiquitination	Ubiquitin--protein ligase.;ATP + ubiquitin + protein lysine = AMP + diphosphate + protein N-ubiquityllysine.;\N;\N;\N;\N;\N
chromosome_2	68056666	+	C	T	Sb02g033410	0	391	129	43	R	*	Uncharacterized conserved protein	None	None	similar to Putative uncharacterized protein OJ1753_E03.102	None	None
chromosome_2	68160434	+	G	T	Sb02g033550	0	1709	1660	554	E	*	Mitochondrial transcription termination factor, mTERF	SUBFAMILY NOT NAMED	None	similar to Putative uncharacterized protein	None	None
chromosome_2	68300286	-	G	A	Sb02g033780	0	1363	919	307	Q	*	Predicted E3 ubiquitin ligase	UNCHARACTERIZED RING ZINC FINGER-CONTAINING PROTEIN	Zinc finger, C3HC4 type (RING finger)	similar to Putative uncharacterized protein OSJNBb0055I24.117	ubiquitin ligase complex,ubiquitin-protein ligase activity,zinc ion binding,protein ubiquitination	Acid--D-amino-acid ligases (peptide synthases).;\N;\N;\N;Tryptophan metabolism;Amino Acid Metabolism;METABOLIC,Acid--D-amino-acid ligases (peptide synthases).;\N;\N;\N;Ubiquinone biosynthesis;Metabolism of Cofactors and Vitamins;METABOLIC
chromosome_2	68546294	-	G	A	Sb02g034030	0	1028	765	255	R	*	None	None	Chalcone and stilbene synthases, N-terminal domain|3-Oxoacyl-[acyl-carrier-protein (ACP)] synthase III|Chalcone and stilbene synthases, C-terminal domain	similar to Putative chalcone synthase	acyltransferase activity,biosynthesis,transferase activity, transferring groups other than amino-acyl groups	Naringenin-chalcone synthase.;3 malonyl-CoA + 4-coumaroyl-CoA = 4 CoA + naringenin-chalcone + 3 CO(2).;\N;\N;Flavonoids, stilbene and lignin biosynthesis;Biosynthesis of Secondary Metabolites;METABOLIC
chromosome_2	68568952	+	C	G	Sb02g034050	2	185	185	62	S	*	Apoptotic ATPase	LEUCINE-RICH REPEAT-CONTAINING PROTEIN	NB-ARC domain|Leucine Rich Repeat|Leucine Rich Repeat|Leucine Rich Repeat|Leucine Rich Repeat|Leucine Rich Repeat	Predicted protein	ATP binding,apoptosis,defense response,defense response to pathogen	None
chromosome_2	68587929	-	G	A	Sb02g034080	0	3466	1533	511	R	*	Predicted E3 ubiquitin ligase	SYNOVIOLIN-RELATED	Zinc finger, C3HC4 type (RING finger)	similar to Putative uncharacterized protein	None	None
chromosome_2	68661410	+	C	A	Sb02g034160	2	1283	1283	428	S	*	UDP-glucuronosyl and UDP-glucosyl transferase	GLUCOSYL/GLUCURONOSYL TRANSFERASES	None	similar to Putative glucosyltransferase	metabolism,transferase activity, transferring hexosyl groups	None
chromosome_2	68677026	-	C	A	Sb02g034190	0	533	100	34	G	*	None	None	None	Predicted protein	None	None
chromosome_2	68721512	-	G	A	Sb02g034230	0	860	422	141	R	*	Uncharacterized conserved protein	FAMILY NOT NAMED	WD domain, G-beta repeat	similar to Putative uncharacterized protein	None	None
chromosome_2	68868212	-	C	A	Sb02g034330	0	47464	795	265	E	*	None	None	K+ potassium transporter	similar to Probable potassium transporter 14	potassium ion transport,potassium ion transporter activity,membrane	None
chromosome_2	69007741	+	C	T	Sb02g034440	0	445	342	114	R	*	Nucleotide excision repair protein RAD16	ATP-DEPENDENT HELICASE SMARCA (SWI/SNF-RELATED MATRIX-ASSOCIATED ACTIN-DEPENDENT REGULATOR OF CHROMATIN A)-RELATED	SNF2 family N-terminal domain|Zinc finger, C3HC4 type (RING finger)|Helicase conserved C-terminal domain	similar to Putative uncharacterized protein	ubiquitin ligase complex,nucleic acid binding,DNA binding,helicase activity,ubiquitin-protein ligase activity,ATP binding,ATP-dependent helicase activity,zinc ion binding,protein ubiquitination	Adenosinetriphosphatase.;ATP + H(2)O = ADP + phosphate.;\N;Hemolytic anemia due to deficiency of adenosine triphosphatase; MIM:102800.;Purine metabolism;Nucleotide Metabolism;METABOLIC
chromosome_2	69008416	+	G	T	Sb02g034440	0	1120	1017	339	E	*	Nucleotide excision repair protein RAD16	ATP-DEPENDENT HELICASE SMARCA (SWI/SNF-RELATED MATRIX-ASSOCIATED ACTIN-DEPENDENT REGULATOR OF CHROMATIN A)-RELATED	SNF2 family N-terminal domain|Zinc finger, C3HC4 type (RING finger)|Helicase conserved C-terminal domain	similar to Putative uncharacterized protein	ubiquitin ligase complex,nucleic acid binding,DNA binding,helicase activity,ubiquitin-protein ligase activity,ATP binding,ATP-dependent helicase activity,zinc ion binding,protein ubiquitination	Adenosinetriphosphatase.;ATP + H(2)O = ADP + phosphate.;\N;Hemolytic anemia due to deficiency of adenosine triphosphatase; MIM:102800.;Purine metabolism;Nucleotide Metabolism;METABOLIC
chromosome_2	69062102	-	C	T	Sb02g034475	2	62	62	21	W	*	None	None	None	Predicted protein	None	None
chromosome_2	69077359	-	G	A	Sb02g034500	0	1826	218	73	Q	*	Microtubule-associated anchor protein involved in autophagy and membrane trafficking	MICROTUBULE-ASSOCIATED PROTEINS 1A/1B LIGHT CHAIN 3-RELATED	Microtubule associated protein 1A/1B, light chain 3	similar to Autophagy-related protein 8A precursor	None	None
chromosome_2	69101078	-	C	A	Sb02g034550	0	534	427	143	E	*	None	None	GRAS family transcription factor	weakly similar to GRAS family transcription factor, putative	None	None
chromosome_2	69134259	+	G	T	Sb02g034600	0	802	802	268	E	*	None	NON-LTR RETROELEMENT REVERSE TRANSCRIPTASE RELATED	None	Predicted protein	None	None
chromosome_2	69135655	-	C	T	Sb02g034610	2	725	725	242	W	*	None	None	Protein of unknown function (DUF1668)	Predicted protein	None	None
chromosome_2	69206497	+	G	T	Sb02g034710	0	19	19	7	E	*	None	None	None	weakly similar to Putative uncharacterized protein OSJNBa0036M16.104	None	None
chromosome_2	69237595	+	C	A	Sb02g034736	1	665	411	137	Y	*	None	RNA-BINDING PROTEIN	RNA recognition motif. (a.k.a. RRM, RBD, or RNP domain)	similar to Os07g0516900 protein	nucleic acid binding	None
chromosome_2	69254366	+	C	A	Sb02g034760	2	50	50	17	S	*	Molecular chaperone (small heat-shock protein Hsp26/Hsp42)	SMALL HEAT-SHOCK PROTEIN (HSP20) FAMILY	Hsp20/alpha crystallin family	similar to Putative uncharacterized protein OSJNBa0036M16.111-1	None	None
chromosome_2	69328842	+	C	T	Sb02g034873	0	40	40	14	R	*	None	TRANSCRIPTIONAL ADAPTOR 2 (ADA2)-RELATED	Myb-like DNA-binding domain|Myb-like DNA-binding domain	Predicted protein	DNA binding,nucleus	None
chromosome_2	69332993	-	G	A	Sb02g034876	0	1703	154	52	Q	*	None	None	None	similar to Putative uncharacterized protein	None	None
chromosome_2	69422818	-	C	A	Sb02g034930	0	3691	2917	973	E	*	Apoptotic ATPase	RAS SUPPRESSOR PROTEIN 1, RSU1	NB-ARC domain|Leucine Rich Repeat|Leucine Rich Repeat|Leucine Rich Repeat|Leucine Rich Repeat|Leucine Rich Repeat|Leucine Rich Repeat|Leucine Rich Repeat	similar to Os07g0521600 protein	ATP binding,sugar binding,apoptosis,defense response,defense response to pathogen	None
chromosome_2	69429582	+	C	T	Sb02g034940	0	1390	1390	464	Q	*	Apoptotic ATPase	LEUCINE-RICH REPEAT-CONTAINING PROTEIN	NB-ARC domain|Leucine Rich Repeat|Leucine Rich Repeat|Leucine Rich Repeat|Leucine Rich Repeat|Leucine Rich Repeat|Leucine Rich Repeat	similar to Os07g0521800 protein	ATP binding,apoptosis,defense response,defense response to pathogen	None
chromosome_2	69460121	+	C	T	Sb02g034960	0	2037	1443	481	Q	*	Glutamate-gated kainate-type ion channel receptor subunit GluR5 and related subunits	IONOTROPIC GLUTAMATE RECEPTOR-RELATED	Receptor family ligand binding region|Ligand-gated ion channel	similar to Putative uncharacterized protein	GABA-B receptor activity,ionotropic glutamate receptor activity,transporter activity,glutamate-gated ion channel activity,transport,membrane	None
chromosome_2	69525195	+	C	A	Sb02g035000	1	6995	1845	615	Y	*	None	SEROLOGICALLY DEFINED BREAST CANCER ANTIGEN NY-BR-84-RELATED	Thioredoxin|Protein of unknown function (DUF1692)	similar to Protein disulfide isomerase	None	None
chromosome_2	69819839	+	C	A	Sb02g035370	1	2014	1047	349	Y	*	None	SERINE-THREONINE PROTEIN KINASE, PLANT-TYPE	Domain of unknown function DUF26|Domain of unknown function DUF26	similar to Receptor-like protein kinase-like	protein kinase activity,protein-tyrosine kinase activity,ATP binding,protein amino acid phosphorylation	None
chromosome_2	69922204	-	G	A	Sb02g035490	0	1164	1014	338	R	*	None	None	Glycosyl hydrolases family 17|X8 domain|X8 domain	similar to Putative uncharacterized protein	hydrolase activity, hydrolyzing O-glycosyl compounds,carbohydrate metabolism	Glucan endo-1,3-beta-D-glucosidase.;Hydrolysis of 1,3-beta-D-glucosidic linkages in 1,3-beta-D-glucans.;\N;\N;Starch and sucrose metabolism;Metabolism of Complex Carbohydrates;METABOLIC
chromosome_2	69923029	-	G	A	Sb02g035490	0	339	189	63	R	*	None	None	Glycosyl hydrolases family 17|X8 domain|X8 domain	similar to Putative uncharacterized protein	hydrolase activity, hydrolyzing O-glycosyl compounds,carbohydrate metabolism	Glucan endo-1,3-beta-D-glucosidase.;Hydrolysis of 1,3-beta-D-glucosidic linkages in 1,3-beta-D-glucans.;\N;\N;Starch and sucrose metabolism;Metabolism of Complex Carbohydrates;METABOLIC
chromosome_2	69964823	-	G	A	Sb02g035550	0	2840	1667	556	Q	*	Serine/threonine protein kinase	SERINE-THREONINE PROTEIN KINASE, PLANT-TYPE	Domain of unknown function DUF26|Domain of unknown function DUF26|Protein kinase domain|Protein tyrosine kinase	similar to Putative uncharacterized protein	protein kinase activity,protein serine/threonine kinase activity,protein-tyrosine kinase activity,ATP binding,protein amino acid phosphorylation	None
chromosome_2	69966128	-	C	T	Sb02g035550	1	1535	923	308	W	*	Serine/threonine protein kinase	SERINE-THREONINE PROTEIN KINASE, PLANT-TYPE	Domain of unknown function DUF26|Domain of unknown function DUF26|Protein kinase domain|Protein tyrosine kinase	similar to Putative uncharacterized protein	protein kinase activity,protein serine/threonine kinase activity,protein-tyrosine kinase activity,ATP binding,protein amino acid phosphorylation	None
chromosome_2	69966965	-	G	A	Sb02g035550	0	698	580	194	Q	*	Serine/threonine protein kinase	SERINE-THREONINE PROTEIN KINASE, PLANT-TYPE	Domain of unknown function DUF26|Domain of unknown function DUF26|Protein kinase domain|Protein tyrosine kinase	similar to Putative uncharacterized protein	protein kinase activity,protein serine/threonine kinase activity,protein-tyrosine kinase activity,ATP binding,protein amino acid phosphorylation	None
chromosome_2	69982431	+	C	A	Sb02g035590	2	593	329	110	S	*	None	None	Glycosyl hydrolase family 14	similar to Beta-amylase	polysaccharide catabolism,beta-amylase activity	Beta-amylase.;Hydrolysis of 1,4-alpha-glucosidic linkages in polysaccharides so as to remove successive maltose units from the non-reducing ends of the chains.;\N;\N;Starch and sucrose metabolism;Metabolism of Complex Carbohydrates;METABOLIC
chromosome_2	70103377	+	G	A	Sb02g035740	2	299	149	50	W	*	None	None	F-box domain	Predicted protein	None	None
chromosome_2	70128491	-	G	A	Sb02g035780	0	20	20	7	R	*	None	None	None	Predicted protein	None	None
chromosome_2	70217918	-	G	A	Sb02g035825	0	205	205	69	R	*	None	REVERSE TRANSCRIPTASES	None	similar to Putative uncharacterized protein	None	None
chromosome_2	70374996	-	G	A	Sb02g035990	0	1061	414	138	Q	*	None	None	Cellulose synthase	similar to Cellulose synthase-like protein OsCslF3	membrane,cellulose synthase (UDP-forming) activity,cellulose biosynthesis	None
chromosome_2	70389552	-	C	A	Sb02g036010	0	197	197	66	G	*	None	None	Cellulose synthase	similar to Cellulose synthase-like protein OsCslF3	membrane,cellulose synthase (UDP-forming) activity,cellulose biosynthesis	None
chromosome_2	70593975	-	G	A	Sb02g036190	0	19305	458	153	Q	*	None	EQUILIBRATIVE NUCLEOSIDE TRANSPORTER ENT (SLC29)	None	similar to Putative equilibrative nucleoside transporter ENT8 splice variant	None	None
chromosome_2	70883686	+	G	T	Sb02g036463	0	1915	571	191	E	*	None	None	None	weakly similar to Putative uncharacterized protein	None	None
chromosome_2	70883852	+	C	T	Sb02g036463	0	2081	643	215	R	*	None	None	None	weakly similar to Putative uncharacterized protein	None	None
chromosome_2	70984498	-	C	T	Sb02g036585	2	2591	2553	851	W	*	None	REVERSE TRANSCRIPTASES	Reverse transcriptase (RNA-dependent DNA polymerase)	weakly similar to H0215A08.3 protein	RNA binding,RNA-directed DNA polymerase activity,RNA-dependent DNA replication	None
chromosome_2	70984627	-	A	T	Sb02g036585	2	2462	2424	808	L	*	None	REVERSE TRANSCRIPTASES	Reverse transcriptase (RNA-dependent DNA polymerase)	weakly similar to H0215A08.3 protein	RNA binding,RNA-directed DNA polymerase activity,RNA-dependent DNA replication	None
chromosome_2	70985047	-	G	T	Sb02g036585	2	2042	2004	668	S	*	None	REVERSE TRANSCRIPTASES	Reverse transcriptase (RNA-dependent DNA polymerase)	weakly similar to H0215A08.3 protein	RNA binding,RNA-directed DNA polymerase activity,RNA-dependent DNA replication	None
chromosome_2	70986261	-	G	T	Sb02g036585	1	828	790	264	Y	*	None	REVERSE TRANSCRIPTASES	Reverse transcriptase (RNA-dependent DNA polymerase)	weakly similar to H0215A08.3 protein	RNA binding,RNA-directed DNA polymerase activity,RNA-dependent DNA replication	None
chromosome_2	70986792	-	G	A	Sb02g036585	0	297	297	99	R	*	None	REVERSE TRANSCRIPTASES	Reverse transcriptase (RNA-dependent DNA polymerase)	weakly similar to H0215A08.3 protein	RNA binding,RNA-directed DNA polymerase activity,RNA-dependent DNA replication	None
chromosome_2	70986813	-	G	A	Sb02g036585	0	276	276	92	R	*	None	REVERSE TRANSCRIPTASES	Reverse transcriptase (RNA-dependent DNA polymerase)	weakly similar to H0215A08.3 protein	RNA binding,RNA-directed DNA polymerase activity,RNA-dependent DNA replication	None
chromosome_2	71054955	+	G	T	Sb02g036650	0	1519	1402	468	E	*	Cytochrome P450	CYTOCHROME P450	Cytochrome P450	similar to Putative uncharacterized protein	monooxygenase activity,electron transport	None
chromosome_2	71056037	-	G	A	Sb02g036660	0	4553	905	302	R	*	Alpha-1,4-N-acetylglucosaminyltransferase	LACTOSYLCERAMIDE 4-ALPHA-GALACTOSYLTRANSFERASE (ALPHA- 1,4-GALACTOSYLTRANSFERASE)	Glycosyltransferase sugar-binding region containing DXD motif|Alpha 1,4-glycosyltransferase conserved region	similar to Os07g0567300 protein	Golgi stack,galactosyltransferase activity	None
chromosome_2	71170076	+	G	A	Sb02g036766	1	1287	285	95	W	*	None	None	None	similar to Putative uncharacterized protein	None	None
chromosome_2	71170085	+	G	A	Sb02g036766	1	1296	294	98	W	*	None	None	None	similar to Putative uncharacterized protein	None	None
chromosome_2	71455221	-	G	A	Sb02g037040	0	748	748	250	Q	*	None	None	Protein of unknown function (DUF295)	weakly similar to Putative F-box domain containing protein	None	None
chromosome_2	71555023	-	G	T	Sb02g037190	1	1890	1768	590	C	*	Serine/threonine protein kinase	SERINE-THREONINE PROTEIN KINASE, PLANT-TYPE	Leucine rich repeat N-terminal domain|Leucine Rich Repeat|Leucine Rich Repeat|Leucine Rich Repeat|Protein tyrosine kinase|Protein kinase domain	similar to Putative uncharacterized protein	DNA binding,protein kinase activity,protein serine/threonine kinase activity,protein-tyrosine kinase activity,ATP binding,DNA methylation,protein amino acid phosphorylation	Phosphotransferases with an alcohol group as acceptor.;\N;\N;\N;Sphingoglycolipid metabolism;Metabolism of Complex Lipids;METABOLIC,Phosphotransferases with an alcohol group as acceptor.;\N;\N;\N;Benzoate degradation via CoA ligation;Biodegradation of Xenobiotics;METABOLIC,Phosphotransferases with an alcohol group as acceptor.;\N;\N;\N;Starch and sucrose metabolism;Metabolism of Complex Carbohydr…
chromosome_2	71661954	+	C	T	Sb02g037340	0	2097	1044	348	R	*	None	PRE-MRNA PROCESSING PROTEIN PRP39-RELATED	Plant protein of unknown function (DUF946)	similar to Putative uncharacterized protein	None	None
chromosome_2	71724783	-	A	C	Sb02g037450	1	1796	373	125	Y	*	None	None	None	similar to Expressed protein	None	None
chromosome_2	71830577	+	C	G	Sb02g037550	2	2430	1795	599	S	*	None	ZINC FINGER PROTEIN	Zinc finger, C2H2 type|Zinc finger, C2H2 type|Zinc finger, C2H2 type	similar to Zinc finger protein-like protein	nucleic acid binding,nucleus,zinc ion binding	None
chromosome_2	71896840	-	G	A	Sb02g037595	0	1225	1088	363	Q	*	None	SUGAR TRANSPORTER	None	similar to Putative uncharacterized protein	transporter activity,sugar porter activity,transport,carbohydrate transport,membrane,integral to membrane	None
chromosome_2	71901091	-	C	A	Sb02g037600	0	1414	753	251	G	*	Predicted transporter (major facilitator superfamily)	SUGAR TRANSPORTER	None	weakly similar to Putative uncharacterized protein	transporter activity,transport,integral to membrane	None
chromosome_2	71916260	-	G	T	Sb02g037623	2	659	534	178	S	*	None	None	None	Predicted protein	None	None
chromosome_2	72204345	-	G	T	Sb02g037920	2	492	492	164	S	*	None	None	None	similar to Putative uncharacterized protein	None	None
chromosome_2	72237268	+	G	T	Sb02g037940	0	205	205	69	E	*	None	BETA CATENIN-RELATED ARMADILLO REPEAT-CONTAINING	Armadillo/beta-catenin-like repeat|Armadillo/beta-catenin-like repeat|Armadillo/beta-catenin-like repeat|Armadillo/beta-catenin-like repeat|Armadillo/beta-catenin-like repeat|Armadillo/beta-catenin-like repeat	similar to Arm repeat-containing protein-like protein	None	None
chromosome_2	72269459	+	C	T	Sb02g037970	0	361	361	121	R	*	None	FORMIN-RELATED	Formin Homology 2 Domain	similar to Os07g0588200 protein	actin binding,cell organization and biogenesis	None
chromosome_2	72333869	+	C	T	Sb02g038030	0	494	333	111	R	*	None	None	Protein of unknown function DUF260	similar to Putative lateral organ boundaries (LOB) domain protein 37	None	None
chromosome_2	72419792	-	T	A	Sb02g038120	0	108	108	36	K	*	Glutathione S-transferase	GLUTATHIONE S-TRANSFERASE, GST, SUPERFAMILY, GST DOMAIN CONTAINING	Glutathione S-transferase, N-terminal domain|Glutathione S-transferase, C-terminal domain	similar to Glutathione transferase	None	Glutathione transferase.;RX + glutathione = HX + R-S-glutathione.;\N;\N;Glutathione metabolism;Metabolism of Other Amino Acids;METABOLIC
chromosome_2	72451440	-	G	T	Sb02g038170	2	1468	1227	409	S	*	None	None	GH3 auxin-responsive promoter	similar to Probable indole-3-acetic acid-amido synthetase GH3.8	None	None
chromosome_2	72485181	-	T	A	Sb02g038230	0	3398	1222	408	R	*	Mismatch repair ATPase MSH2 (MutS family)	DNA MISMATCH REPAIR MUTS RELATED PROTEINS	MutS domain I|MutS domain II|MutS domain III|MutS family domain IV|MutS domain V	similar to DNA mismatch repair protein MSH2	DNA binding,damaged DNA binding,ATP binding,nucleus,DNA metabolism,DNA repair,mismatch repair	None
chromosome_2	72529439	-	C	A	Sb02g038276	0	2423	1614	538	G	*	Clathrin coat dissociation kinase GAK/PTEN/Auxilin and related tyrosine phosphatases	FORMIN-RELATED	None	similar to Putative uncharacterized protein	None	None
chromosome_2	72560861	-	G	A	Sb02g038285	0	123	123	41	R	*	None	None	None	weakly similar to Os08g0141000 protein	None	None
chromosome_2	72626053	-	G	T	Sb02g038345	2	271	227	76	S	*	None	None	None	weakly similar to Chromosome chr17 scaffold_12, whole genome shotgun sequence	None	None
chromosome_2	72679723	+	G	T	Sb02g038400	0	3229	1702	568	E	*	Cobalamin synthesis protein	COBW-RELATED	CobW/HypB/UreG, nucleotide-binding domain|Cobalamin synthesis protein cobW C-terminal domain	similar to Putative cobW protein	None	None
chromosome_2	72752596	-	C	T	Sb02g038530	2	366	264	88	W	*	Flavonol reductase/cinnamoyl-CoA reductase	NAD DEPENDENT EPIMERASE/DEHYDRATASE	NAD dependent epimerase/dehydratase family	similar to Putative uncharacterized protein	None	None
chromosome_2	72872169	+	C	T	Sb02g038650	0	64	64	22	Q	*	Predicted hydrolase/acyltransferase (alpha/beta hydrolase superfamily)	ALPHA/BETA HYDROLASE RELATED	alpha/beta hydrolase fold	similar to Os07g0603600 protein	catalytic activity	None
chromosome_2	73133080	-	G	A	Sb02g039000	0	1875	156	52	R	*	Small Nuclear ribonucleoprotein G	SMALL NUCLEAR RIBONUCLEOPROTEIN	LSM domain	similar to Putative small nuclear ribonucleoprotein G	nucleus,small nucleolar ribonucleoprotein complex,mRNA processing,ribonucleoprotein complex	None
chromosome_2	73406904	-	G	A	Sb02g039260	0	1114	777	259	R	*	40S ribosomal protein SA (P40)/Laminin receptor 1	RIBOSOMAL PROTEIN S2, EUKARYOTIC AND ARCHAEAL FORM	Ribosomal protein S2	similar to Putative uncharacterized protein	nucleic acid binding,structural constituent of ribosome,carboxypeptidase A activity,intracellular,nucleus,ribosome,protein biosynthesis,proteolysis and peptidolysis,zinc ion binding	None
chromosome_2	73411869	-	G	A	Sb02g039270	0	1011	366	122	R	*	40S ribosomal protein SA (P40)/Laminin receptor 1	RIBOSOMAL PROTEIN S2, EUKARYOTIC AND ARCHAEAL FORM	Ribosomal protein S2	similar to Putative uncharacterized protein	structural constituent of ribosome,intracellular,ribosome,protein biosynthesis,small ribosomal subunit	None
chromosome_2	73421133	-	G	A	Sb02g039300	0	1279	930	310	R	*	None	None	AP2 domain	weakly similar to EREB-like protein	transcription factor activity,nucleus,regulation of transcription, DNA-dependent	None
chromosome_2	73421400	-	G	A	Sb02g039300	0	1012	663	221	Q	*	None	None	AP2 domain	weakly similar to EREB-like protein	transcription factor activity,nucleus,regulation of transcription, DNA-dependent	None
chromosome_2	73421793	-	G	A	Sb02g039300	0	619	270	90	Q	*	None	None	AP2 domain	weakly similar to EREB-like protein	transcription factor activity,nucleus,regulation of transcription, DNA-dependent	None
chromosome_2	73494035	-	G	A	Sb02g039380	0	1208	998	333	Q	*	Dihydropteroate synthase/7,8-dihydro-6-hydroxymethylpterin-pyrophosphokinase/Dihydroneopterin aldolase	FOLATE SYNTHESIS PROTEINS	7,8-dihydro-6-hydroxymethylpterin-pyrophosphokinase (HPPK)|Pterin binding enzyme	similar to Putative dihydropterin pyrophosphokinase /dihydropteroate synthase	2-amino-4-hydroxy-6-hydroxymethyldihydropteridine diphosphokinase activity,dihydropteroate synthase activity,folic acid and derivative metabolism,folic acid and derivative biosynthesis	2-amino-4-hydroxy-6-hydroxymethyldihydropteridine pyrophosphokinase.;ATP + 2-amino-4-hydroxy-6-hydroxymethyl-7,8-dihydropteridine = AMP + 2-amino-7,8-dihydro-4-hydroxy-6-(diphosphooxymethyl)pteridine.;\N;\N;Folate biosynthesis;Metabolism of Cofactors and Vitamins;METABOLIC
chromosome_2	73556321	-	A	C	Sb02g039450	2	259	259	87	L	*	None	None	SAP domain	weakly similar to Transcription factor R18-like protein	None	None
chromosome_2	73560712	-	C	T	Sb02g039460	2	2196	813	271	W	*	Ca2+/calmodulin-dependent protein kinase, EF-Hand protein superfamily	CALCIUM/CALMODULIN-DEPENDENT PROTEIN KINASE-RELATED	Protein kinase domain|Protein tyrosine kinase	similar to Putative uncharacterized protein	protein kinase activity,protein serine/threonine kinase activity,protein-tyrosine kinase activity,calcium ion binding,ATP binding,protein amino acid phosphorylation	Phosphotransferases with an alcohol group as acceptor.;\N;\N;\N;Sphingoglycolipid metabolism;Metabolism of Complex Lipids;METABOLIC,Phosphotransferases with an alcohol group as acceptor.;\N;\N;\N;Benzoate degradation via CoA ligation;Biodegradation of Xenobiotics;METABOLIC,Phosphotransferases with an alcohol group as acceptor.;\N;\N;\N;Starch and sucrose metabolism;Metabolism of Complex Carbohydr…
chromosome_2	73736521	-	G	A	Sb02g039680	0	3052	711	237	Q	*	Predicted hydrolase/acyltransferase (alpha/beta hydrolase superfamily)	ALPHA/BETA HYDROLASE RELATED	None	similar to Hydrolase-like protein	catalytic activity,aromatic compound metabolism,hydrolase activity	None
chromosome_2	73819312	+	G	A	Sb02g039763	1	60	60	20	W	*	None	None	None	Predicted protein	None	None
chromosome_2	73820146	+	C	G	Sb02g039763	1	894	162	54	Y	*	None	None	None	Predicted protein	None	None
chromosome_2	73892886	-	A	T	Sb02g039800	1	444	163	55	C	*	None	TREHALOSE-6-PHOSPHATE SYNTHASE	None	similar to Ramosa 3	None	None
chromosome_2	74020582	-	C	A	Sb02g039890	0	78	78	26	E	*	Copper chaperone	COPPER TRANSPORT PROTEIN ATOX1-RELATED	Heavy-metal-associated domain	similar to Putative uncharacterized protein	metal ion transport,metal ion binding	None
chromosome_2	74059822	+	G	T	Sb02g039940	0	376	376	126	E	*	None	None	Protein of unknown function (DUF1618)	Predicted protein	None	None
chromosome_2	74183170	-	G	A	Sb02g040150	0	1535	693	231	R	*	Origin recognition complex, subunit 6	FAMILY NOT NAMED	Origin recognition complex subunit 6 (ORC6)	similar to Origin recognition complex subunit 6-like protein	DNA binding,nuclear origin of replication recognition complex,DNA replication	None
chromosome_2	74256272	+	C	G	Sb02g040260	2	1473	671	224	S	*	Splicing factor 3b, subunit 4	RNA-BINDING PROTEIN	RNA recognition motif. (a.k.a. RRM, RBD, or RNP domain)|RNA recognition motif. (a.k.a. RRM, RBD, or RNP domain)	similar to Chloroplast 29 kDa ribonucleoprotein	nucleic acid binding	None
chromosome_2	74296226	-	G	A	Sb02g040310	0	1069	529	177	Q	*	None	None	None	Predicted protein	None	None
chromosome_2	74296343	-	G	A	Sb02g040310	0	952	412	138	Q	*	None	None	None	Predicted protein	None	None
chromosome_2	74312293	-	G	A	Sb02g040340	0	1808	117	39	R	*	None	None	X8 domain	similar to Beta-1,3-glucanase-like protein	None	None
chromosome_2	74437351	-	G	A	Sb02g040500	0	1261	972	324	R	*	Cytochrome P450 CYP4/CYP19/CYP26 subfamilies	CYTOCHROME P450	Cytochrome P450	similar to Cytochrome P450 CYP709C1	monooxygenase activity,electron transport	Acting on paired donors, with incorporation or reduction of;\N;\N;\N;gamma-Hexachlorocyclohexane degradation;Biodegradation of Xenobiotics;METABOLIC,Acting on paired donors, with incorporation or reduction of;\N;\N;\N;Ascorbate and aldarate metabolism;Carbohydrate Metabolism;METABOLIC,Acting on paired donors, with incorporation or reduction of;\N;\N;\N;Flavonoids, stilbene and lignin biosynthesis…
chromosome_2	74437720	-	G	A	Sb02g040500	0	892	603	201	R	*	Cytochrome P450 CYP4/CYP19/CYP26 subfamilies	CYTOCHROME P450	Cytochrome P450	similar to Cytochrome P450 CYP709C1	monooxygenase activity,electron transport	Acting on paired donors, with incorporation or reduction of;\N;\N;\N;gamma-Hexachlorocyclohexane degradation;Biodegradation of Xenobiotics;METABOLIC,Acting on paired donors, with incorporation or reduction of;\N;\N;\N;Ascorbate and aldarate metabolism;Carbohydrate Metabolism;METABOLIC,Acting on paired donors, with incorporation or reduction of;\N;\N;\N;Flavonoids, stilbene and lignin biosynthesis…
chromosome_2	74443560	+	C	T	Sb02g040510	0	845	543	181	R	*	Cytochrome P450 CYP4/CYP19/CYP26 subfamilies	CYTOCHROME P450	Cytochrome P450	similar to Putative cytochrome P450	monooxygenase activity,electron transport	Acting on paired donors, with incorporation or reduction of;\N;\N;\N;gamma-Hexachlorocyclohexane degradation;Biodegradation of Xenobiotics;METABOLIC,Acting on paired donors, with incorporation or reduction of;\N;\N;\N;Ascorbate and aldarate metabolism;Carbohydrate Metabolism;METABOLIC,Acting on paired donors, with incorporation or reduction of;\N;\N;\N;Flavonoids, stilbene and lignin biosynthesis…
chromosome_2	74451550	+	G	T	Sb02g040530	0	697	697	233	E	*	None	PENTATRICOPEPTIDE REPEAT-CONTAINING PROTEIN	PPR repeat|PPR repeat|PPR repeat|PPR repeat|PPR repeat|PPR repeat|PPR repeat	similar to Selenium-binding protein-like	None	None
chromosome_2	74463078	-	C	T	Sb02g040540	2	356	356	119	W	*	Pseudouridine synthase	CENTROMERE/MICROTUBULE BINDING PROTEIN CBF5	DKCLD (NUC011) domain|TruB family pseudouridylate synthase (N terminal domain)|PUA domain	similar to H/ACA ribonucleoprotein complex subunit 4, putative, expressed	RNA binding,pseudouridylate synthase activity,RNA processing	Transferring other groups.;\N;\N;\N;\N;\N;\N
chromosome_2	74516529	-	G	C	Sb02g040600	2	3005	1597	533	S	*	None	None	Protein of unknown function, DUF537	similar to Putative uncharacterized protein	None	None
chromosome_2	74571179	+	C	A	Sb02g040660	1	1315	1227	409	Y	*	None	None	Peroxidase	similar to Putative uncharacterized protein	rhodopsin-like receptor activity,peroxidase activity,structural constituent of cell wall,response to oxidative stress,G-protein coupled receptor protein signaling pathway,integral to membrane	Peroxidase.;Donor + H(2)O(2) = oxidized donor + 2 H(2)O.;Heme.;Myeloperoxidase deficiency with disseminated candidiasis; MIM:254600.;Flavonoids, stilbene and lignin biosynthesis;Biosynthesis of Secondary Metabolites;METABOLIC,Peroxidase.;Donor + H(2)O(2) = oxidized donor + 2 H(2)O.;Heme.;Myeloperoxidase deficiency with disseminated candidiasis; MIM:254600.;Phenylalanine metabolism;Amino Acid Meta…
chromosome_2	74629832	-	G	A	Sb02g040730	0	364	364	122	Q	*	None	None	Peroxidase	similar to Putative uncharacterized protein	peroxidase activity,structural constituent of cell wall,response to oxidative stress	None
chromosome_2	74834264	-	G	A	Sb02g040930	0	643	603	201	R	*	None	None	Protein of unknown function (DUF1639)	weakly similar to Putative uncharacterized protein	None	None
chromosome_2	74834504	-	C	T	Sb02g040930	1	403	370	124	W	*	None	None	Protein of unknown function (DUF1639)	weakly similar to Putative uncharacterized protein	None	None
chromosome_2	75107196	+	G	A	Sb02g041240	2	480	446	149	W	*	Cysteine proteinase Cathepsin L	CYSTEINE PROTEASE FAMILY C1-RELATED	Cathepsin propeptide inhibitor domain (I29)|Papain family cysteine protease	similar to Putative cysteine proteinase	cysteine-type endopeptidase activity,proteolysis and peptidolysis,cysteine-type peptidase activity	Cysteine endopeptidases.;\N;\N;\N;\N;\N;\N
chromosome_2	75180941	-	C	T	Sb02g041330	2	3532	1476	492	W	*	Cytochrome P450 CYP4/CYP19/CYP26 subfamilies	CYTOCHROME P450	Cytochrome P450	similar to Putative uncharacterized protein	monooxygenase activity,hydrolase activity, hydrolyzing O-glycosyl compounds,carbohydrate metabolism,electron transport	Thromboxane-A synthase.;(5Z,13E)-(15S)-9-alpha,11-alpha-epidioxy-15-hydroxyprosta-5,13-dienoate = (5Z,13E)-(15S)-9-alpha,11-alpha-epoxy-15-hydroxythromba-5,13-dienoate.;Heme-thiolate.;Hemorrhagic diathesis due to deficiency of thromboxane; MIM:274180.;Prostaglandin and leukotriene metabolism;Metabolism of Complex Lipids;METABOLIC
chromosome_2	75182068	-	C	T	Sb02g041330	1	2405	349	117	W	*	Cytochrome P450 CYP4/CYP19/CYP26 subfamilies	CYTOCHROME P450	Cytochrome P450	similar to Putative uncharacterized protein	monooxygenase activity,hydrolase activity, hydrolyzing O-glycosyl compounds,carbohydrate metabolism,electron transport	Thromboxane-A synthase.;(5Z,13E)-(15S)-9-alpha,11-alpha-epidioxy-15-hydroxyprosta-5,13-dienoate = (5Z,13E)-(15S)-9-alpha,11-alpha-epoxy-15-hydroxythromba-5,13-dienoate.;Heme-thiolate.;Hemorrhagic diathesis due to deficiency of thromboxane; MIM:274180.;Prostaglandin and leukotriene metabolism;Metabolism of Complex Lipids;METABOLIC
chromosome_2	75280699	-	T	A	Sb02g041470	0	2422	686	229	K	*	Speckle-type POZ protein SPOP and related proteins with TRAF, MATH and BTB/POZ domains	KELCH-RELATED PROTEINS	MATH domain|BTB/POZ domain	similar to Putative zinc finger POZ domain protein	protein binding	None
chromosome_2	75382637	-	G	A	Sb02g041620	0	503	439	147	Q	*	3-oxoacyl-(acyl-carrier-protein) synthase (I and II)	POLYKETIDE SYNTHASE-RELATED	Beta-ketoacyl synthase, N-terminal domain|Beta-ketoacyl synthase, C-terminal domain	similar to Putative 3-oxoacyl-[acyl-carrier-protein] synthase I, chloroplast	catalytic activity,fatty acid biosynthesis	3-oxoacyl-[acyl-carrier protein] synthase.;Acyl-[acyl-carrier protein] + malonyl-[acyl-carrier protein] = 3-oxoacyl-[acyl-carrier protein] + CO(2) + [acyl-carrier protein].;\N;\N;Fatty acid biosynthesis (path 1);Lipid Metabolism;METABOLIC
chromosome_2	75386938	+	C	T	Sb02g041640	0	98	22	8	Q	*	Vesicle coat complex COPII, subunit SEC31	SEC31-RELATED PROTEIN	WD domain, G-beta repeat|WD domain, G-beta repeat|WD domain, G-beta repeat|WD domain, G-beta repeat|WD domain, G-beta repeat	similar to Putative uncharacterized protein	None	Triacylglycerol lipase.;Triacylglycerol + H(2)O = diacylglycerol + a fatty acid anion.;\N;Hepatic lipase deficiency; MIM:151670. Congenital lipase deficiency; MIM:246600. Wolman disease; MIM:278000.;Glycerolipid metabolism;Metabolism of Complex Lipids;METABOLIC
chromosome_2	75399448	+	G	A	Sb02g041645	2	295	173	58	W	*	None	SEC31-RELATED PROTEIN	None	similar to Putative uncharacterized protein	None	None
chromosome_2	75465560	-	G	A	Sb02g041720	0	1405	711	237	Q	*	Mitochondrial/chloroplast ribosomal protein S9	RIBOSOMAL PROTEIN S9	Ribosomal protein S9/S16	similar to Os07g0658200 protein	structural constituent of ribosome,intracellular,ribosome,protein biosynthesis	None
chromosome_2	75513019	-	C	A	Sb02g041750	0	1326	571	191	E	*	None	None	None	Predicted protein	None	None
chromosome_2	75543667	-	A	T	Sb02g041780	1	1638	388	130	C	*	Myotrophin and similar proteins	ANKYRIN REPEAT-CONTAINING	Ankyrin repeat|Ankyrin repeat	similar to Os07g0659100 protein	None	None
chromosome_2	75572165	-	C	A	Sb02g041830	0	1247	453	151	E	*	None	CONDENSIN	None	similar to Putative condensin subunit 1	None	None
chromosome_2	75670335	+	G	T	Sb02g041940	0	3724	2169	723	G	*	Mitochondrial translation elongation factor EF-Tsmt, catalyzes nucleotide exchange on EF-Tumt	ELONGATION FACTOR TS	S1 RNA binding domain|S1 RNA binding domain|UBA/TS-N domain|Elongation factor TS|UBA/TS-N domain|Elongation factor TS	similar to Elongation factor Ts	nucleic acid binding,RNA binding,structural constituent of ribosome,translation elongation factor activity,ribosome,protein biosynthesis,translational elongation	Exo-alpha-sialidase.;Hydrolysis of alpha-(2->3)-, alpha-(2->6)-, alpha-(2->8)-glycosidic linkages of terminal sialic residues in oligosaccharides, glycoproteins, glycolipids, colominic acid and synthetic substrates.;\N;Sialidosis; MIM:256550.;N-Glycan degradation;Metabolism of Complex Carbohydrates;METABOLIC,Exo-alpha-sialidase.;Hydrolysis of alpha-(2->3)-, alpha-(2->6)-, alpha-(2->8)-glycosidic …
chromosome_2	75686843	-	C	A	Sb02g041960	0	1824	451	151	E	*	Glycosyltransferase	GLUCOSAMINEPHOSPHOTRANSFERASE	Glycosyl transferase family 4	similar to Putative uncharacterized protein	catalytic activity,lipid metabolism,membrane	UDP-N-acetylglucosamine--dolichyl-phosphate N-acetylglucosaminephosphotransferase.;UDP-N-acetyl-D-glucosamine + dolichyl phosphate = UMP + N-acetyl-D- glucosaminyl-diphosphodolichol.;\N;\N;N-Glycans biosynthesis;Metabolism of Complex Carbohydrates;METABOLIC
chromosome_2	75754616	-	T	A	Sb02g042000	0	4482	3254	1085	K	*	None	FAMILY NOT NAMED	DDT domain|PHD-finger|PHD-finger|PHD-finger	similar to Os07g0661500 protein	DNA binding,regulation of transcription, DNA-dependent	Adenosinetriphosphatase.;ATP + H(2)O = ADP + phosphate.;\N;Hemolytic anemia due to deficiency of adenosine triphosphatase; MIM:102800.;Purine metabolism;Nucleotide Metabolism;METABOLIC
chromosome_2	75756286	-	A	T	Sb02g042000	1	2812	1835	612	C	*	None	FAMILY NOT NAMED	DDT domain|PHD-finger|PHD-finger|PHD-finger	similar to Os07g0661500 protein	DNA binding,regulation of transcription, DNA-dependent	Adenosinetriphosphatase.;ATP + H(2)O = ADP + phosphate.;\N;Hemolytic anemia due to deficiency of adenosine triphosphatase; MIM:102800.;Purine metabolism;Nucleotide Metabolism;METABOLIC
chromosome_2	75804215	+	G	A	Sb02g042080	1	1131	1131	377	W	*	None	None	None	Predicted protein	None	None
chromosome_2	75847348	+	G	A	Sb02g042115	2	788	615	205	W	*	Reductases with broad range of substrate specificities	SHORT-CHAIN DEHYDROGENASES/REDUCTASE	short chain dehydrogenase	similar to Os07g0663500 protein	catalytic activity,metabolism,oxidoreductase activity	3-hydroxybutyrate dehydrogenase.;(R)-3-hydroxybutanoate + NAD(+) = acetoacetate + NADH.;\N;\N;Synthesis and degradation of ketone bodies;Lipid Metabolism;METABOLIC,3-hydroxybutyrate dehydrogenase.;(R)-3-hydroxybutanoate + NAD(+) = acetoacetate + NADH.;\N;\N;Butanoate metabolism;Carbohydrate Metabolism;METABOLIC
chromosome_2	75855196	-	C	T	Sb02g042130	2	1156	640	214	W	*	Reductases with broad range of substrate specificities	SHORT-CHAIN DEHYDROGENASES/REDUCTASE	short chain dehydrogenase	similar to Os07g0663600 protein	metabolism,oxidoreductase activity	None
chromosome_2	75859959	-	G	A	Sb02g042140	0	640	513	171	Q	*	Reductases with broad range of substrate specificities	SHORT-CHAIN DEHYDROGENASES/REDUCTASE	short chain dehydrogenase	similar to Os07g0663600 protein	metabolism,oxidoreductase activity	3-oxoacyl-[acyl-carrier protein] reductase.;(3R)-3-hydroxyacyl-[acyl-carrier protein] + NADP(+) = 3-oxoacyl- [acyl-carrier protein] + NADPH.;\N;\N;Fatty acid biosynthesis (path 1);Lipid Metabolism;METABOLIC
chromosome_2	75973784	+	G	T	Sb02g042285	0	229	229	77	E	*	None	WD40 REPEAT PROTEIN	None	similar to Putative small nuclear ribonucleoprotein	None	None
chromosome_2	75976927	-	A	T	Sb02g042290	2	1537	897	299	L	*	Serine/threonine protein kinase	SERINE-THREONINE PROTEIN KINASE, PLANT-TYPE	Domain of unknown function DUF26|Protein tyrosine kinase|Protein kinase domain	similar to Putative uncharacterized protein	protein kinase activity,protein serine/threonine kinase activity,protein-tyrosine kinase activity,ATP binding,protein amino acid phosphorylation	None
chromosome_2	76018254	+	C	A	Sb02g042330	2	11897	4832	1611	S	*	DNA polymerase zeta, catalytic subunit	DNA POLYMERASE B FAMILY MEMBER	DNA polymerase family B	similar to DNA polymerase	nucleotide binding,DNA binding,DNA-directed DNA polymerase activity,DNA replication,proteolysis and peptidolysis,metallopeptidase activity,zinc ion binding,3'-5' exonuclease activity	DNA-directed DNA polymerase.;N deoxynucleoside triphosphate = N diphosphate + {DNA}(N).;\N;\N;Purine metabolism;Nucleotide Metabolism;METABOLIC,DNA-directed DNA polymerase.;N deoxynucleoside triphosphate = N diphosphate + {DNA}(N).;\N;\N; DNA polymerase;REPLICATION AND REPAIR;REGULATORY,DNA-directed DNA polymerase.;N deoxynucleoside triphosphate = N diphosphate + {DNA}(N).;\N;\N;Pyrimidine metabo…
chromosome_2	76269724	+	G	T	Sb02g042560	0	411	249	83	E	*	AAA+-type ATPase	AAA ATPASE	ATPase family associated with various cellular activities (AAA)|ATPase family associated with various cellular activities (AAA)	similar to Putative MSP1(Mitochondrial sorting of proteins) protein	nucleotide binding,trypsin activity,ATP binding,proteolysis and peptidolysis,nucleoside-triphosphatase activity	None
chromosome_2	76278853	+	A	T	Sb02g042560	0	9540	2801	934	K	*	AAA+-type ATPase	AAA ATPASE	ATPase family associated with various cellular activities (AAA)|ATPase family associated with various cellular activities (AAA)	similar to Putative MSP1(Mitochondrial sorting of proteins) protein	nucleotide binding,trypsin activity,ATP binding,proteolysis and peptidolysis,nucleoside-triphosphatase activity	None
chromosome_2	76278891	+	G	A	Sb02g042560	1	9578	2839	947	W	*	AAA+-type ATPase	AAA ATPASE	ATPase family associated with various cellular activities (AAA)|ATPase family associated with various cellular activities (AAA)	similar to Putative MSP1(Mitochondrial sorting of proteins) protein	nucleotide binding,trypsin activity,ATP binding,proteolysis and peptidolysis,nucleoside-triphosphatase activity	None
chromosome_2	76333289	-	G	A	Sb02g042635	0	58	58	20	Q	*	None	None	None	Predicted protein	DNA binding	None
chromosome_2	76346023	-	T	A	Sb02g042650	0	1721	513	171	K	*	None	None	None	Predicted protein	None	None
chromosome_2	76347127	-	C	A	Sb02g042650	0	617	132	44	G	*	None	None	None	Predicted protein	None	None
chromosome_2	76347711	-	A	C	Sb02g042650	1	33	33	11	Y	*	None	None	None	Predicted protein	None	None
chromosome_2	76359371	+	G	A	Sb02g042676	1	174	174	58	W	*	None	CYTOCHROME P450	None	similar to Cytochrome P450 family protein	monooxygenase activity,electron transport	None
chromosome_2	76416202	-	G	T	Sb02g042725	1	2135	667	223	C	*	tRNA-splicing endonuclease positive effector (SEN1)	DNA2/NAM7 HELICASE FAMILY	None	similar to Putative uncharacterized protein	cysteine-type endopeptidase activity,proteolysis and peptidolysis	In phosphorous-containing anhydrides.;\N;\N;\N;Starch and sucrose metabolism;Metabolism of Complex Carbohydrates;METABOLIC,In phosphorous-containing anhydrides.;\N;\N;\N;Folate biosynthesis;Metabolism of Cofactors and Vitamins;METABOLIC
chromosome_2	76458052	+	G	A	Sb02g042745	2	548	548	183	W	*	None	REVERSE TRANSCRIPTASES	None	weakly similar to OSJNBb0050O03.4 protein	None	None
chromosome_2	76465552	-	G	A	Sb02g042760	0	640	396	132	R	*	None	None	AP2 domain	similar to AP2 domain transcription factor EREBP	transcription factor activity,nucleus,regulation of transcription, DNA-dependent	None
chromosome_2	76571916	+	G	T	Sb02g042830	0	166	166	56	G	*	None	None	None	Predicted protein	None	None
chromosome_2	76572884	+	C	T	Sb02g042830	0	1134	811	271	Q	*	None	None	None	Predicted protein	None	None
chromosome_2	76695241	-	G	T	Sb02g042955	1	3449	1367	456	Y	*	None	REVERSE TRANSCRIPTASES	Zinc knuckle|Zinc knuckle|Endonuclease/Exonuclease/phosphatase family	Predicted protein	nucleic acid binding	None
chromosome_2	76742635	-	G	T	Sb02g042980	2	1389	1162	388	S	*	None	None	None	Predicted protein	None	None
chromosome_2	76783806	-	C	T	Sb02g043000	1	6273	2567	856	W	*	None	SUBFAMILY NOT NAMED	B3 DNA binding domain|CW-type Zinc Finger	similar to VP1/ABI3 family regulatory protein-like	DNA binding,regulation of transcription, DNA-dependent,zinc ion binding	None
chromosome_2	76788320	-	C	A	Sb02g043000	0	1759	559	187	E	*	None	SUBFAMILY NOT NAMED	B3 DNA binding domain|CW-type Zinc Finger	similar to VP1/ABI3 family regulatory protein-like	DNA binding,regulation of transcription, DNA-dependent,zinc ion binding	None
chromosome_2	76802684	-	G	A	Sb02g043010	0	1862	387	129	R	*	Uncharacterized conserved protein, contains PA domain	RING FINGER AND PROTEASE ASSOCIATED DOMAIN-CONTAINING	PA domain	similar to Putative vacuolar targeting receptor	calcium ion binding,proteolysis and peptidolysis,peptidase activity	None
chromosome_2	76817843	-	A	C	Sb02g043040	2	10617	4379	1460	L	*	DEAD box-containing helicase-like transcription factor/DNA repair protein	ATP-DEPENDENT HELICASE SMARCA (SWI/SNF-RELATED MATRIX-ASSOCIATED ACTIN-DEPENDENT REGULATOR OF CHROMATIN A)-RELATED	SNF2 family N-terminal domain|PHD-finger|Tetratricopeptide repeat|Helicase conserved C-terminal domain	similar to Putative uncharacterized protein	nucleic acid binding,DNA binding,helicase activity,ATP binding,regulation of transcription, DNA-dependent,ATP-dependent helicase activity	Adenosinetriphosphatase.;ATP + H(2)O = ADP + phosphate.;\N;Hemolytic anemia due to deficiency of adenosine triphosphatase; MIM:102800.;Purine metabolism;Nucleotide Metabolism;METABOLIC
chromosome_2	76826479	-	G	A	Sb02g043040	0	1981	1401	467	Q	*	DEAD box-containing helicase-like transcription factor/DNA repair protein	ATP-DEPENDENT HELICASE SMARCA (SWI/SNF-RELATED MATRIX-ASSOCIATED ACTIN-DEPENDENT REGULATOR OF CHROMATIN A)-RELATED	SNF2 family N-terminal domain|PHD-finger|Tetratricopeptide repeat|Helicase conserved C-terminal domain	similar to Putative uncharacterized protein	nucleic acid binding,DNA binding,helicase activity,ATP binding,regulation of transcription, DNA-dependent,ATP-dependent helicase activity	Adenosinetriphosphatase.;ATP + H(2)O = ADP + phosphate.;\N;Hemolytic anemia due to deficiency of adenosine triphosphatase; MIM:102800.;Purine metabolism;Nucleotide Metabolism;METABOLIC
chromosome_2	76875852	+	G	A	Sb02g043100	2	545	545	182	W	*	None	None	None	Predicted protein	None	None
chromosome_2	77089070	+	C	T	Sb02g043280	0	915	847	283	Q	*	Thioredoxin	THIOREDOXIN-RELATED	Thioredoxin	similar to Putative uncharacterized protein	None	None
chromosome_2	77089306	+	A	T	Sb02g043280	0	1151	1198	400	K	*	Thioredoxin	THIOREDOXIN-RELATED	Thioredoxin	similar to Putative uncharacterized protein	None	None
chromosome_2	77189612	+	C	A	Sb02g043370	2	1039	342	114	S	*	Dehydrogenases with different specificities (related to short-chain alcohol dehydrogenases)	SHORT-CHAIN DEHYDROGENASES/REDUCTASE	None	similar to Carbonyl reductase-like protein	metabolism,oxidoreductase activity	Carbonyl reductase (NADPH).;R-CHOH-R' + NADP(+) = R-CO-R' + NADPH.;\N;\N;Prostaglandin and leukotriene metabolism;Metabolism of Complex Lipids;METABOLIC
chromosome_2	77239914	-	G	A	Sb02g043420	0	426	303	101	Q	*	None	MYB-RELATED	Myb-like DNA-binding domain|Myb-like DNA-binding domain	similar to Typical P-type R2R3 Myb protein	DNA binding,nucleus	None
chromosome_2	77360922	-	G	A	Sb02g043560	0	216	216	72	R	*	ER to golgi transport protein/RAD50-interacting protein 1	FAMILY NOT NAMED	RINT-1 / TIP-1 family	similar to Putative uncharacterized protein	None	None
chromosome_2	77508452	-	G	A	Sb02g043710	0	295	295	99	Q	*	None	CALMODULIN-BINDING HEAT-SHOCK PROTEIN	Lipase 3 N-terminal region	similar to Putative uncharacterized protein	None	None
chromosome_2	77517347	-	C	T	Sb02g043730	2	2138	904	302	W	*	Predicted E3 ubiquitin ligase	UNCHARACTERIZED	Zinc finger, C3HC4 type (RING finger)	similar to Zinc finger, C3HC4 type family protein, expressed	ubiquitin ligase complex,ubiquitin-protein ligase activity,zinc ion binding,protein ubiquitination	None
chromosome_2	77533182	-	G	T	Sb02g043745	1	354	181	61	Y	*	None	None	None	similar to Putative uncharacterized protein	None	None
chromosome_2	77606261	+	G	T	Sb02g043810	0	6319	1684	562	E	*	None	FAMILY NOT NAMED	D-ala D-ala ligase N-terminus	similar to Putative uncharacterized protein P0034A04.101-1	cell wall,D-alanine-D-alanine ligase activity,peptidoglycan biosynthesis	None
chromosome_2	77671969	+	G	T	Sb02g043870	0	2320	1750	584	E	*	DNA repair protein, SNF2 family	ATP-DEPENDENT HELICASE SMARCA (SWI/SNF-RELATED MATRIX-ASSOCIATED ACTIN-DEPENDENT REGULATOR OF CHROMATIN A)-RELATED	SNF2 family N-terminal domain|Helicase conserved C-terminal domain	similar to Putative uncharacterized protein	nucleic acid binding,DNA binding,helicase activity,ATP binding,ATP-dependent helicase activity	Adenosinetriphosphatase.;ATP + H(2)O = ADP + phosphate.;\N;Hemolytic anemia due to deficiency of adenosine triphosphatase; MIM:102800.;Purine metabolism;Nucleotide Metabolism;METABOLIC
chromosome_2	77912494	+	C	A	Sb02g044090	1	997	453	151	Y	*	Serine/threonine protein kinase	SERINE-THREONINE PROTEIN KINASE, PLANT-TYPE	Protein kinase domain|Protein tyrosine kinase	similar to Serine/threonine kinase	protein kinase activity,protein serine/threonine kinase activity,protein-tyrosine kinase activity,ATP binding,protein amino acid phosphorylation	Phosphotransferases with an alcohol group as acceptor.;\N;\N;\N;Sphingoglycolipid metabolism;Metabolism of Complex Lipids;METABOLIC,Phosphotransferases with an alcohol group as acceptor.;\N;\N;\N;Benzoate degradation via CoA ligation;Biodegradation of Xenobiotics;METABOLIC,Phosphotransferases with an alcohol group as acceptor.;\N;\N;\N;Starch and sucrose metabolism;Metabolism of Complex Carbohydr…
[truncated: 4,370 more rows]

## Sheet: Loss of stop codon
Chromosome	Position	Strand	Reference allele	Shalepense allele	Gene ID	Codon phase	Position in gene	Position in CDS	Position in protein	Ref. AA	Halepense AA	KOG	PANTHER	PFAM	Locus defline	GO	Ecpathway info.
chromosome_1	263378	-	A	C	Sb01g000365	0	704	632	211	*	G	None	UNCHARACTERIZED	Protein of unknown function, DUF547	similar to Os03g0859900 protein	None	None
chromosome_1	937499	-	A	T	Sb01g001020	0	956	366	122	*	R	None	None	None	similar to SnRK1-interacting protein 1, putative, expressed	None	None
[truncated: 2,519 more rows]

## Sheet: Translation initiation
Chromosome	Position	Strand	Reference allele	Shalepense allele	Gene ID	Codon phase	Position in gene	Position in CDS	Position in protein	Ref. AA	Halepense AA	KOG	PANTHER	PFAM	Locus defline	GO	Ecpathway info.
[truncated: 236 more rows]
